# Supplementary material for: Synthesis of 1,4-epoxy-2-aryltetrahydro-1-benzazepines via rhodium(iii)-catalyzed C–H allylation/intramolecular 1,3-dipolar cycloaddition
Source: Royal Society of Chemistry journal article supplement (doi:10.1039/d3cc05082c), 2024-01-01
Supplement: d3cc05082c1.pdf [file d3cc05082c1.pdf]

**Supplementary Information for**

**Synthesis of 1,4-Epoxy-2-aryltetrahydro-1-benzazepines via**

**Rhodium(III)-Catalyzed C-H Allylation/Intramolecular 1,3-**

**dipolar Cycloaddition**

*Xuan Wang,<sup>§ab</sup>Jianlong Li,<sup>§ac</sup> Haifang Du,<sup>a</sup> Weihong Liang,<sup>ac</sup> Cheng Luo,<sup>b</sup> Yunshan Wu,<sup>\*ac</sup> Bo Liu,<sup>\*acd</sup>*

*<sup>a</sup> Guangdong Provincial Hospital of Chinese Medicine, The Second Affiliated Hospital of Guangzhou University of Chinese Medicine, Guangzhou 510006, PR China.*

*<sup>b</sup> Zhongshan Institute for Drug Discovery, Shanghai Institute of Materia Medica, Chinese Academy of Sciences, Zhongshan 528400, PR China.*

*<sup>c</sup> Guangzhou Key Laboratory of Chirality Research on Active Components of Traditional Chinese Medicine, Guangzhou 510006, PR China.*

*<sup>d</sup> State Key Laboratory of Dampness Syndrome of Chinese Medicine, Guangzhou, 510006, PR China.*

*<sup>§</sup>These authors contributed equally to this work.*

*E-mail: Bo Liu, doctliu@263.net; Yunshan Wu, wysh2005@hotmail.com.*

## Table of contents

|                                                                                         |      |
|-----------------------------------------------------------------------------------------|------|
| Abbreviations .....                                                                     | S3   |
| General remarks .....                                                                   | S4   |
| General procedure for the preparation of catalysts and nitrones .....                   | S4   |
| List of nitrones : .....                                                                | S6   |
| Optimization of reaction conditions .....                                               | S17  |
| Table S1. Optimization of reaction conditions <sup>a</sup> .....                        | S17  |
| General procedure for the synthesis of 3 (taking 3a as an example): .....               | S21  |
| Experimental procedure for the synthesis of double molecular allylation product 5a..... | S31  |
| Experimental procedure for N-O cleavage of 3a.....                                      | S32  |
| Preliminary mechanistic studies .....                                                   | S33  |
| Scheme S1. Experiments for mechanistic studies. ....                                    | S33  |
| Kinetic Isotope Effect Experiments: intermolecular competitive reactions .....          | S33  |
| Competition between nitrones.....                                                       | S34  |
| Scheme S2 Plausible catalytic mechanism.....                                            | S35  |
| References.....                                                                         | S36  |
| <sup>1</sup> H NMR and <sup>13</sup> C NMR Spectra .....                                | S37  |
| Crystallographic Data.....                                                              | S107 |

## Abbreviations

THF: Tetrahydrofuran

CH<sub>2</sub>Cl<sub>2</sub>: Dichlormethane

CHCl<sub>3</sub>: Chloroform

DMSO: Dimethyl sulfoxide

DMF: N,N-Dimethylformamide

PE: Petroleum ether

EA: Ethyl acetate

EtOH: Ethanol

CH<sub>3</sub>CN: Acetonitrile

TFEA: 2,2,2-Trifluoroethanol

PhCl: Chlorobenzene

PhCF<sub>3</sub>: Trifluoromethylbenzene

CDCl<sub>3</sub>: Deuterated chloroform

equiv: equivalents

TLC: Thin layer chromatography

HRMS: High resolution mass spectrometry

r.t.: room temperature

h: hours

Hz : Hertz

kV : Kilovolt

μA: Microampere

MHz : Megahertz

## General remarks

Reagents were purchased from commercial suppliers (Macklin, Aladdin, Bidepharm, Energy Chemical, etc.) and used without further purification, unless noted otherwise. Solvents were obtained in analytical grade and used as received for reactions, extractions, eluents, precipitation, solid washing etc. unless indicated otherwise. Dry DCE, benzotrifluoride, chlorobenzene, 1,4-dioxane, CH<sub>3</sub>CN, DMSO, DMF for reactions were purchased in a dry form from J&K Scientific, Macklin, Energy Chemical and stored over molecular sieves as well as under an atmosphere of dry N<sub>2</sub>. Deuterated solvents for NMR were obtained from Macklin, and Energy Chemical, in the indicated purity grade and used as received for NMR spectroscopy.

<sup>1</sup>H NMR spectra were recorded on Bruker 600 MHz (with cryoprobe) spectrometers in the indicated deuterated solvents. Data are reported as follows: chemical shift (δ, ppm), multiplicity (s, singlet; d, doublet; t, triplet; q, quartet; m, multiplet), coupling constant(s) (*J*, Hz), integration. All signals were referenced to the internal solvent signal as standard (CDCl<sub>3</sub>, δ 7.26). <sup>13</sup>C NMR spectra were recorded with <sup>1</sup>H-decoupling on Bruker 151 MHz (with cryoprobe) spectrometers in the indicated deuterated solvent. Mass spectra were recorded on a Thermo LTQ Orbitrap xl with an ESI probe (capillary temperature: 350 °C, sheath gas flow: 40.00 arb, aux gas flow: 10.00 arb, sweep gas flow: 2.00 arb, spray voltage: 5.00 kV, source current: 100 μA, capillary voltage: 6.00 V, tube lens: 90.00 V). Column chromatography (petroleum ether/ethyl acetate) was performed on silica gel (200-300 mesh).

## General procedure for the preparation of catalysts and nitrones

[Cp\*RhCl<sub>2</sub>]<sub>2</sub>,<sup>[1]</sup> [Cp\*Rh(CH<sub>3</sub>CN)<sub>3</sub>](SbF<sub>6</sub>)<sub>2</sub>,<sup>[2]</sup> nitrones<sup>[3]</sup> were synthesized according to published procedures.

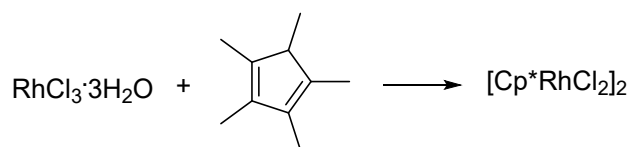



[Cp\*RhCl<sub>2</sub>]<sub>2</sub>: The known title complex was prepared as follows. To RhCl<sub>3</sub>•3H<sub>2</sub>O (1.0 g, 3.8 mmol) in 25 mL of methanol was added excess pentamethylcyclopentadiene (0.9 mL, 5.7 mmol, 1.5 equiv). The mixture was stirred under reflux for 20 h. After the mixture was cooled to room temperature, the product was isolated by filtration and washing with ether. Yield 858 mg (73%).

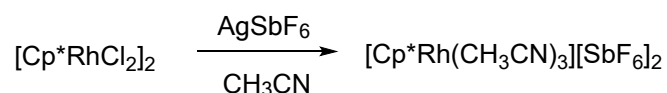

[Cp\*Rh(CH<sub>3</sub>CN)<sub>3</sub>][SbF<sub>6</sub>]<sub>2</sub>: To the suspension of [Cp\*RhCl<sub>2</sub>]<sub>2</sub> (700 mg, 1.13 mmol) in dried CH<sub>3</sub>CN (9 mL), the solution of AgSbF<sub>6</sub> (1.9 g, 5.53 mmol, 4.9 equiv) in dried CH<sub>3</sub>CN (10 mL) was added. Then the white solid precipitated immediately. The reaction was stirred at r.t. for another 3 h. Then the solid was removed by filtration on celite and washed with CH<sub>3</sub>CN (10 mL x 3). The filtrate was evaporated in *vacuo* to 10 mL, Et<sub>2</sub>O (15 mL) was added dropwise and the pale yellow solid precipitated. The pale yellow solid was collected by filtration, washed with EtOAc (10 mL x 3) and Et<sub>2</sub>O (10 mL), dried in *vacuo* to afford [Cp\*Rh(CH<sub>3</sub>CN)<sub>3</sub>][SbF<sub>6</sub>]<sub>2</sub> (858 mg, 76% yield).

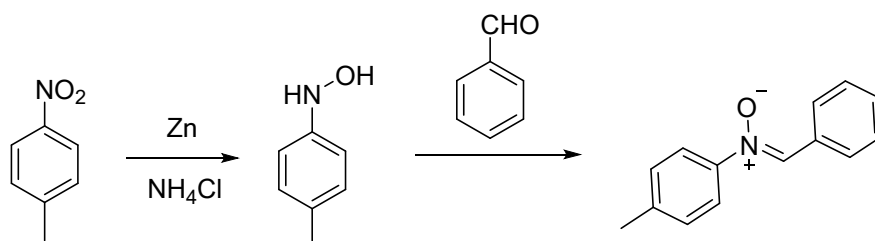

One-pot synthesis

Nitroarene (1.0 equiv), aldehyde (1.1 equiv) and NH<sub>4</sub>Cl (1.2 equiv) were added to a mixture of EtOH (2 mL/mmol of starting material) and H<sub>2</sub>O (2 mL/mmol of starting material). Then the resulting mixture was cooled to 0 °C. Zinc powder (2.0 equiv) was added with several batches over 4 hours at 0 °C, and the reaction mixture was allowed to warm to room temperature and stirred for 16 hours. The reaction mixture was filtered through a pad of celite and washed with CH<sub>2</sub>Cl<sub>2</sub>. The filtrate was extracted with CH<sub>2</sub>Cl<sub>2</sub> and the combined organic layers were dried over Na<sub>2</sub>SO<sub>4</sub>, filtered and

concentrated to give the crude nitrones. Pure nitrones were obtained by recrystallization from ethanol or column chromatography with silica gel.

### List of nitrones:

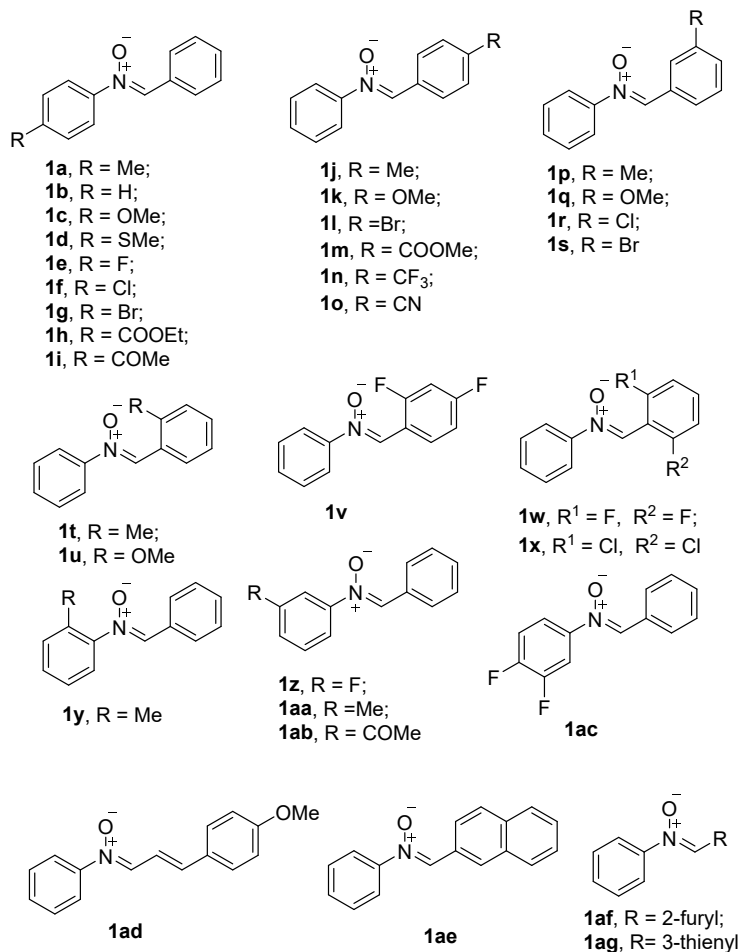

For those nitrones (**1j-1m**, **1o-1q**, **1t-1u**, **1x**, **1ae**) whose analytical data can be easily found in other literature, only <sup>1</sup>H-NMR and LRMS data would be supplied below. For others, <sup>1</sup>H-NMR, <sup>13</sup>C-NMR and HRMS data would be reported in the following part.

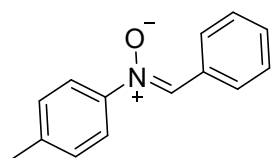

Compound **1a**: Yield 60% from recrystallization, <sup>1</sup>H NMR (600 MHz, CDCl<sub>3</sub>) δ 8.39 (dd, *J* = 7.1, 1.9 Hz, 2H), 7.90 (s, 1H), 7.67 (d, *J* = 8.1 Hz, 2H), 7.50 – 7.44 (m, 3H), 7.27 (d, *J* = 7.9 Hz, 2H), 2.42 (s, 3H); <sup>13</sup>C NMR (151 MHz, CDCl<sub>3</sub>) δ 146.8, 140.2, 134.1, 130.8, 130.8, 129.6, 129.0, 128.6, 121.5, 21.1; HRMS (ESI<sup>+</sup>) *m/z*: calcd for [M+H]<sup>+</sup>C<sub>14</sub>H<sub>14</sub>NO: 212.1070, found: 212.1076.

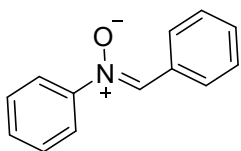

Compound **1b**: Yield 52% from recrystallization;  $^1\text{H}$  NMR (600 MHz,  $\text{CDCl}_3$ )  $\delta$  8.46 – 8.34 (m, 2H), 7.92 (s, 1H), 7.82 – 7.70 (m, 2H), 7.47 (dtd,  $J = 8.0, 5.5, 4.9, 2.4$  Hz, 6H);  $^{13}\text{C}$  NMR (151 MHz,  $\text{CDCl}_3$ )  $\delta$  149.0, 134.6, 130.9, 130.5, 129.9, 129.1, 129.0, 128.6, 121.7; HRMS (ESI $^+$ )  $m/z$ : calcd for  $[\text{M}+\text{H}]^+$   $\text{C}_{13}\text{H}_{12}\text{NO}$ : 198.0913, found: 198.0909.

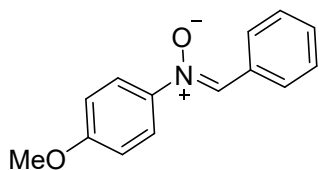

Compound **1c**: Yield 55% from recrystallization,  $^1\text{H}$  NMR (600 MHz,  $\text{CDCl}_3$ )  $\delta$  8.43 – 8.30 (m, 2H), 7.87 (s, 1H), 7.77 – 7.66 (m, 2H), 7.53 – 7.39 (m, 3H), 6.98 – 6.84 (m, 2H), 3.83 (s, 3H);  $^{13}\text{C}$  NMR (151 MHz,  $\text{CDCl}_3$ )  $\delta$  159.5, 141.3, 132.7, 129.7, 129.7, 127.9, 127.6, 121.9, 112.9, 54.6; HRMS (ESI $^+$ )  $m/z$ : calcd for  $[\text{M}+\text{H}]^+$   $\text{C}_{14}\text{H}_{14}\text{NO}_2$ : 228.1019, found: 228.1011.

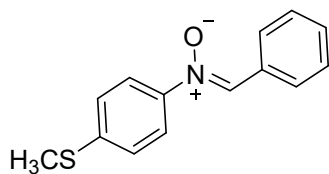

Compound **1d**: Yield 58% from recrystallization;  $^1\text{H}$  NMR (600 MHz,  $\text{CDCl}_3$ )  $\delta$  8.42 – 8.34 (m, 2H), 7.91 (s, 1H), 7.73 – 7.65 (m, 2H), 7.46 (dd,  $J = 5.2, 2.0$  Hz, 3H), 7.32 – 7.24 (m, 2H), 2.50 (s, 3H);  $^{13}\text{C}$  NMR (151 MHz,  $\text{CDCl}_3$ )  $\delta$  145.8, 141.3, 133.9, 130.8, 130.5, 128.9, 128.5, 125.9, 121.8, 15.3; HRMS (ESI $^+$ )  $m/z$ : calcd for  $[\text{M}+\text{H}]^+$   $\text{C}_{14}\text{H}_{14}\text{NOS}$ : 244.0791, found: 244.0796.

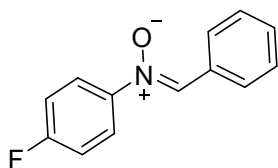

Compound **1e**: Yield 46% from recrystallization;  $^1\text{H}$  NMR (600 MHz,  $\text{CDCl}_3$ )  $\delta$  8.47 – 8.33 (m, 2H), 7.87 (s, 1H), 7.82 – 7.72 (m, 2H), 7.51 – 7.41 (m, 3H), 7.19 – 7.06 (m,

2H);  $^{13}\text{C}$  NMR (151 MHz,  $\text{CDCl}_3$ )  $\delta$  162.9 (d,  $J = 250.7$  Hz), 145.1 (d,  $J = 3.0$  Hz), 134.5, 131.0, 130.4, 129.0, 128.6, 123.6 (d,  $J = 8.8$  Hz), 115.9 (d,  $J = 23.3$  Hz); HRMS (ESI<sup>+</sup>)  $m/z$ : calcd for  $[\text{M}+\text{H}]^+ \text{C}_{13}\text{H}_{11}\text{FNO}$ : 216.0819, found: 216.0812.

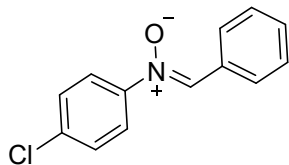

Compound **1f**: Yield 65% from recrystallization,  $^1\text{H}$  NMR (600 MHz,  $\text{CDCl}_3$ )  $\delta$  8.42 – 8.35 (m, 2H), 7.90 (s, 1H), 7.76 – 7.70 (m, 2H), 7.49 – 7.46 (m, 3H), 7.46 – 7.42 (m, 2H);  $^{13}\text{C}$  NMR (151 MHz,  $\text{CDCl}_3$ )  $\delta$  147.3, 135.7, 134.6, 131.2, 130.3, 129.2, 129.0, 128.6, 123.0; HRMS (ESI<sup>+</sup>)  $m/z$ : calcd for  $[\text{M}+\text{H}]^+ \text{C}_{13}\text{H}_{11}\text{ClNO}$ : 232.0524, found: 232.0518.

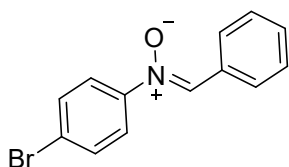

Compound **1g**: Yield 53% from recrystallization,  $^1\text{H}$  NMR (600 MHz,  $\text{CDCl}_3$ )  $\delta$  8.44 – 8.31 (m, 1H), 7.90 (s, 1H), 7.71 – 7.63 (m, 1H), 7.63 – 7.55 (m, 1H), 7.48 (dd,  $J = 4.8$ , 1.9 Hz, 2H);  $^{13}\text{C}$  NMR (151 MHz,  $\text{CDCl}_3$ )  $\delta$  147.8, 134.6, 132.2, 131.2, 130.3, 129.1, 128.7, 123.8, 123.2; HRMS (ESI<sup>+</sup>)  $m/z$ : calcd for  $[\text{M}+\text{H}]^+ \text{C}_{13}\text{H}_{11}\text{BrNO}$ : 276.0019, found: 276.0028.

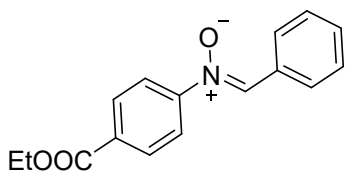

Compound **1h**: Yield 45% from recrystallization,  $^1\text{H}$  NMR (600 MHz,  $\text{CDCl}_3$ )  $\delta$  8.46 – 8.37 (m, 2H), 8.18 – 8.08 (m, 2H), 7.98 (s, 1H), 7.88 – 7.81 (m, 2H), 7.47 (dd,  $J = 5.1$ , 1.9 Hz, 3H), 4.39 (q,  $J = 7.1$  Hz, 2H), 1.40 (t,  $J = 7.1$  Hz, 3H);  $^{13}\text{C}$  NMR (151 MHz,  $\text{CDCl}_3$ )  $\delta$  164.3, 150.7, 134.3, 130.7, 130.4, 129.6, 129.3, 128.2, 127.7, 120.7, 60.5, 13.3; HRMS (ESI<sup>+</sup>)  $m/z$ : calcd for  $[\text{M}+\text{H}]^+ \text{C}_{16}\text{H}_{15}\text{NO}_3$ : 270.1125, found: 270.1133.

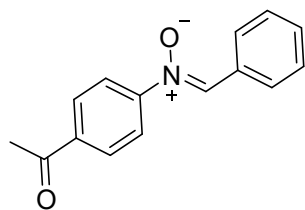

Compound **1i**: Yield 42% from recrystallization;  $^1\text{H}$  NMR (600 MHz,  $\text{CDCl}_3$ )  $\delta$  8.41 (dd,  $J = 6.8, 2.9$  Hz, 2H), 8.06 (d,  $J = 8.3$  Hz, 2H), 7.99 (s, 1H), 7.89 (d,  $J = 8.3$  Hz, 2H), 7.57 – 7.44 (m, 3H), 2.64 (s, 3H);  $^{13}\text{C}$  NMR (151 MHz,  $\text{CDCl}_3$ )  $\delta$  196.7, 151.7, 137.9, 135.4, 131.5, 130.2, 129.4, 129.3, 128.7, 122.0, 26.8; HRMS (ESI $^+$ )  $m/z$ : calcd for  $[\text{M}+\text{H}]^+ \text{C}_{15}\text{H}_{14}\text{NO}_2$ : 240.1019, found: 240.1026.

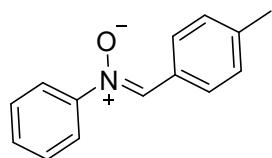

Compound **1j**: Yield 56% from recrystallization,  $^1\text{H}$  NMR (600 MHz,  $\text{CDCl}_3$ )  $\delta$  8.30 (d,  $J = 8.1$  Hz, 2H), 7.89 (s, 1H), 7.78 (dd,  $J = 8.1, 1.6$  Hz, 2H), 7.48 (qd,  $J = 7.6, 6.5, 3.8$  Hz, 3H), 7.30 (d,  $J = 8.0$  Hz, 2H), 2.42 (s, 3H); LRMS (ESI $^+$ )  $m/z$ : calcd for  $[\text{M}+\text{H}]^+ \text{C}_{14}\text{H}_{13}\text{NO}$ : 212.1, found: 212.2.

Analytical data of compound **1j** were identical to previously reported values.<sup>[4]</sup>

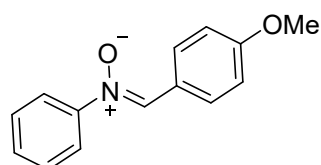

Compound **1k**: Yield 41% from recrystallization,  $^1\text{H}$  NMR (600 MHz,  $\text{CDCl}_3$ )  $\delta$  8.40 (d,  $J = 8.7$  Hz, 2H), 7.85 (s, 1H), 7.76 (dq,  $J = 7.9, 1.5$  Hz, 2H), 7.45 (dddd,  $J = 13.7, 7.1, 3.6, 2.0$  Hz, 3H), 6.98 (dt,  $J = 9.0, 1.7$  Hz, 2H), 3.87 (s, 3H); LRMS (ESI $^+$ )  $m/z$ : calcd for  $[\text{M}+\text{H}]^+ \text{C}_{16}\text{H}_{14}\text{NO}_2$ : 228.1, found: 228.1.

Analytical data of compound **1k** were identical to previously reported values.<sup>[3]</sup>

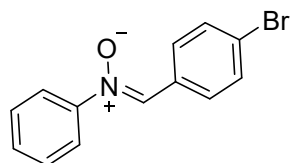

Compound **1l**: Yield 43% from recrystallization,  $^1\text{H}$  NMR (600 MHz,  $\text{CDCl}_3$ )  $\delta$  8.35 – 8.10 (m, 2H), 7.89 (s, 1H), 7.83 – 7.70 (m, 2H), 7.65 – 7.54 (m, 2H), 7.47 (dd,  $J = 5.3, 2.0$  Hz, 3H); LRMS ( $\text{ESI}^+$ )  $m/z$ : calcd for  $[\text{M}+\text{H}]^+$   $\text{C}_{13}\text{H}_{11}\text{BrNO}$ : 276.0, found: 276.1.

Analytical data of compound **1l** were identical to previously reported values.<sup>[5]</sup>

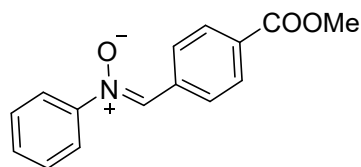

Compound **1m**: Yield 47% from recrystallization,  $^1\text{H}$  NMR (600 MHz,  $\text{CDCl}_3$ )  $\delta$  8.43 (d,  $J = 8.4$  Hz, 2H), 8.17 – 8.08 (m, 2H), 7.99 (s, 1H), 7.82 – 7.71 (m, 2H), 7.57 – 7.41 (m, 3H), 3.93 (s, 3H); LRMS ( $\text{ESI}^+$ )  $m/z$ : calcd for  $[\text{M}+\text{H}]^+$   $\text{C}_{16}\text{H}_{14}\text{NO}_3$ : 256.1, found: 256.1.

Analytical data of compound **1m** were identical to previously reported values.<sup>[3]</sup>

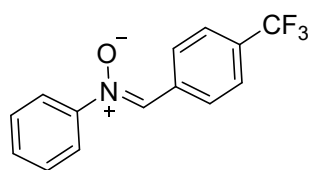

Compound **1n**: Yield 57% from recrystallization,  $^1\text{H}$  NMR (600 MHz,  $\text{CDCl}_3$ )  $\delta$  8.49 (d,  $J = 8.1$  Hz, 2H), 8.00 (s, 1H), 7.83 – 7.65 (m, 4H), 7.58 – 7.35 (m, 3H);  $^{13}\text{C}$  NMR (151 MHz,  $\text{CDCl}_3$ )  $\delta$  148.8, 133.6, 133.1, 131.7 (q,  $J = 32.5$  Hz), 130.4, 129.2, 128.9, 125.5 (q,  $J = 3.8$  Hz), 123.7 (q,  $J = 272.3$  Hz), 121.6; HRMS ( $\text{ESI}^+$ )  $m/z$ : calcd for  $[\text{M}+\text{H}]^+$   $\text{C}_{14}\text{H}_{10}\text{F}_3\text{NO}$ : 266.0787, found: 266.0792.

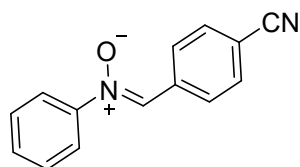

Compound **1o**: Yield 52% from recrystallization,  $^1\text{H}$  NMR (600 MHz,  $\text{CDCl}_3$ )  $\delta$  8.48 (d,  $J = 8.4$  Hz, 2H), 8.00 (s, 1H), 7.92 – 7.71 (m, 4H), 7.52 (h,  $J = 2.7$  Hz, 3H); LRMS ( $\text{ESI}^+$ )  $m/z$ : calcd for  $[\text{M}+\text{H}]^+$   $\text{C}_{14}\text{H}_{11}\text{N}_2\text{O}$ : 223.1, found: 223.1.

Analytical data of compound **1n** were identical to previously reported values.<sup>[4]</sup>

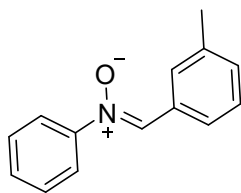

Compound **1p**: Yield 63% from column chromatography (SiO<sub>2</sub>, PE/EA = 5:1 v/v), <sup>1</sup>H NMR (600 MHz, CDCl<sub>3</sub>) δ 8.31 (s, 1H), 8.12 (d, *J* = 7.9 Hz, 1H), 7.88 (s, 1H), 7.84 – 7.72 (m, 2H), 7.47 (d, *J* = 7.6 Hz, 3H), 7.37 (t, *J* = 7.7 Hz, 1H), 7.29 (d, *J* = 7.7 Hz, 1H), 2.42 (s, 3H); LRMS (ESI<sup>+</sup>) *m/z*: calcd for [M+H]<sup>+</sup> C<sub>14</sub>H<sub>14</sub>NO: 212.1, found: 212.2.

Analytical data of compound **1p** were identical to previously reported values.<sup>[6]</sup>

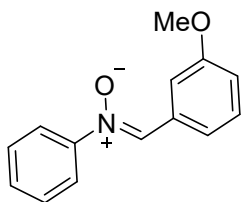

Compound **1q**: Yield 55% from column chromatography (SiO<sub>2</sub>, PE/EA = 5:1 v/v), <sup>1</sup>H NMR (600 MHz, CDCl<sub>3</sub>) δ 8.38 (dd, *J* = 2.7, 1.5 Hz, 1H), 7.92 (s, 1H), 7.85 – 7.69 (m, 2H), 7.65 (dt, *J* = 7.8, 1.1 Hz, 1H), 7.55 – 7.43 (m, 3H), 7.37 (t, *J* = 8.0 Hz, 1H), 7.04 (ddd, *J* = 8.2, 2.7, 0.9 Hz, 1H), 3.89 (s, 3H); LRMS (ESI<sup>+</sup>) *m/z*: calcd for [M+H]<sup>+</sup> C<sub>14</sub>H<sub>14</sub>NO<sub>2</sub>: 228.1, found: 228.3.

Analytical data of compound **1q** were identical to previously reported values.<sup>[4]</sup>

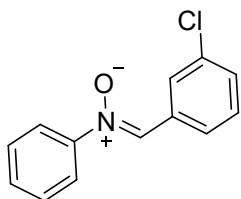

Compound **1r**: Yield 49% from recrystallization, <sup>1</sup>H NMR (600 MHz, CDCl<sub>3</sub>) δ 8.56 (s, 1H), 8.13 (d, *J* = 7.6 Hz, 1H), 7.90 (s, 1H), 7.80 – 7.69 (m, 2H), 7.47 (d, *J* = 5.3 Hz, 3H), 7.40 (dt, *J* = 15.5, 8.0 Hz, 2H); <sup>13</sup>C NMR (151 MHz, CDCl<sub>3</sub>) δ 148.8, 134.6, 133.2, 132.1, 130.7, 130.2, 129.7, 129.2, 128.3, 127.0, 121.6; HRMS (ESI<sup>+</sup>) *m/z*: calcd for [M+H]<sup>+</sup> C<sub>13</sub>H<sub>11</sub>ClNO: 232.0524, found: 232.0521.

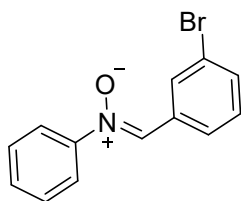

Compound **1s**: Yield 56% from recrystallization,  $^1\text{H}$  NMR (600 MHz,  $\text{CDCl}_3$ )  $\delta$  8.69 (t,  $J = 1.8$  Hz, 1H), 8.19 (d,  $J = 7.9$  Hz, 1H), 7.88 (s, 1H), 7.78 – 7.68 (m, 2H), 7.63 – 7.52 (m, 1H), 7.47 (dd,  $J = 5.1, 2.0$  Hz, 3H), 7.32 (t,  $J = 7.9$  Hz, 1H);  $^{13}\text{C}$  NMR (151 MHz,  $\text{CDCl}_3$ )  $\delta$  148.7, 133.6, 133.0, 132.3, 131.2, 130.2, 130.0, 129.2, 127.4, 122.7, 121.6; HRMS (ESI<sup>+</sup>)  $m/z$ : calcd for  $[\text{M}+\text{H}]^+\text{C}_{13}\text{H}_{11}\text{BrNO}$ : 276.0019, found: 276.0025.

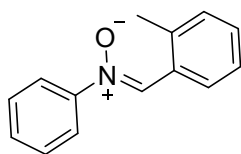

Compound **1t**: Yield 51% from recrystallization,  $^1\text{H}$  NMR (600 MHz,  $\text{CDCl}_3$ )  $\delta$  9.56 – 9.26 (m, 1H), 8.07 (s, 1H), 7.86 – 7.68 (m, 2H), 7.64 – 7.45 (m, 3H), 7.45 – 7.30 (m, 2H), 2.45 (s, 3H); LRMS (ESI<sup>+</sup>)  $m/z$ : calcd for  $[\text{M}+\text{H}]^+\text{C}_{14}\text{H}_{14}\text{NO}$ : 212.1, found: 212.2.

Analytical data of compound **1t** were identical to previously reported values.<sup>[7]</sup>

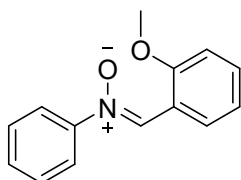

Compound **1u**: Yield 60% from column chromatography ( $\text{SiO}_2$ , PE/EA = 5:1 v/v),  $^1\text{H}$  NMR (600 MHz,  $\text{CDCl}_3$ )  $\delta$  9.48 (dd,  $J = 8.0, 1.7$  Hz, 1H), 8.40 (s, 1H), 7.78 (dt,  $J = 6.5, 1.4$  Hz, 2H), 7.55 – 7.36 (m, 4H), 7.09 (t,  $J = 7.7$  Hz, 1H), 7.00 – 6.76 (m, 1H), 3.87 (s, 3H); LRMS (ESI<sup>+</sup>)  $m/z$ : calcd for  $[\text{M}+\text{H}]^+\text{C}_{14}\text{H}_{14}\text{NO}_2$ : 228.1, found: 228.2.

Analytical data of compound **1u** were identical to previously reported values.<sup>[4]</sup>

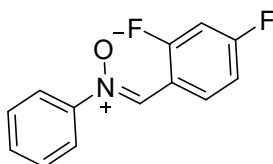

Compound **1v**: Yield 42% from recrystallization,  $^1\text{H}$  NMR (600 MHz,  $\text{CDCl}_3$ )  $\delta$  9.54 (td,  $J = 8.7, 6.8$  Hz, 1H), 8.14 (s, 1H), 7.85 – 7.66 (m, 2H), 7.56 – 7.43 (m, 3H), 7.01 (td,  $J = 8.6, 2.5$  Hz, 1H), 6.88 (ddd,  $J = 11.0, 8.5, 2.6$  Hz, 1H);  $^{13}\text{C}$  NMR (151 MHz,



CDCl<sub>3</sub>)  $\delta$  163.7 (dd,  $J = 256.2, 12.6$  Hz), 161.9 (dd,  $J = 256.6, 11.7$  Hz), 148.9, 130.2 (dd,  $J = 8.6, 2.3$  Hz), 130.2, 129.6, 129.4, 129.2, 125.8 (d,  $J = 6.9$  Hz), 121.6, 115.9 (dd,  $J = 8.8, 3.9$  Hz), 111.6 (dd,  $J = 20.8, 3.6$  Hz), 103.6 (dd,  $J = 25.7, 25.7$  Hz); HRMS (ESI<sup>+</sup>)  $m/z$ : calcd for [M+H]<sup>+</sup> C<sub>13</sub>H<sub>9</sub>F<sub>2</sub>NO: 234.0725, found: 234.0728.

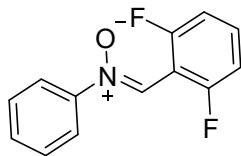

Compound **1w**: Yield 48% from recrystallization, <sup>1</sup>H NMR (600 MHz, CDCl<sub>3</sub>)  $\delta$  7.98 (s, 1H), 7.80 (dd,  $J = 7.6, 2.1$  Hz, 2H), 7.51 – 7.44 (m, 3H), 7.39 (tt,  $J = 8.4, 6.2$  Hz, 1H), 6.98 (t,  $J = 8.6$  Hz, 2H); <sup>13</sup>C NMR (151 MHz, CDCl<sub>3</sub>)  $\delta$  160.6 (dd,  $J = 255.6, 7.2$  Hz), 148.0, 131.7 (t,  $J = 10.4$  Hz), 130.5, 129.0, 123.9, 121.8, 111.7 (dd,  $J = 21.2, 3.6$  Hz), 108.4 (d,  $J = 3.1$  Hz); HRMS (ESI<sup>+</sup>)  $m/z$ : calcd for [M+H]<sup>+</sup> C<sub>13</sub>H<sub>9</sub>F<sub>2</sub>NO: 234.0725, found: 234.0726.

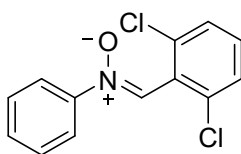

Compound **1x**: Yield 58% from recrystallization, <sup>1</sup>H NMR (600 MHz, CDCl<sub>3</sub>)  $\delta$  8.06 (s, 1H), 7.86 – 7.79 (m, 2H), 7.55 – 7.47 (m, 3H), 7.46 – 7.39 (m, 2H), 7.33 (dd,  $J = 8.7, 7.4$  Hz, 1H); LRMS (ESI<sup>+</sup>)  $m/z$ : calcd for [M+H]<sup>+</sup> C<sub>13</sub>H<sub>10</sub>Cl<sub>2</sub>NO: 266.0, found: 266.3.

Analytical data of compound **1x** were identical to previously reported values.<sup>[8]</sup>

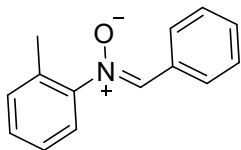

Compound **1y**: Yield 55% from recrystallization, <sup>1</sup>H NMR (600 MHz, CDCl<sub>3</sub>)  $\delta$  8.36 (dd,  $J = 6.7, 3.0$  Hz, 2H), 7.57 (s, 1H), 7.51 – 7.44 (m, 3H), 7.38 (dd,  $J = 7.7, 1.3$  Hz, 1H), 7.34 (td,  $J = 7.5, 1.3$  Hz, 1H), 7.32 – 7.25 (m, 2H), 2.43 (s, 3H); <sup>13</sup>C NMR (151 MHz, CDCl<sub>3</sub>)  $\delta$  148.5, 137.5, 131.6, 131.4, 130.8, 130.2, 129.3, 128.7, 128.6, 126.6, 123.3, 17.0; HRMS (ESI<sup>+</sup>)  $m/z$ : calcd for [M+H]<sup>+</sup> C<sub>14</sub>H<sub>14</sub>NO: 212.1070, found: 212.1073.

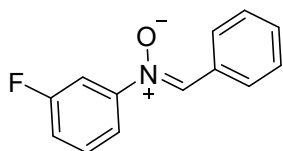

Compound **1z**: Yield 59% from recrystallization,  $^1\text{H}$  NMR (600 MHz,  $\text{CDCl}_3$ )  $\delta$  8.46 – 8.31 (m, 2H), 7.93 (s, 1H), 7.63 – 7.51 (m, 2H), 7.48 (m, 3H), 7.44 (td,  $J = 8.1, 5.8$  Hz, 1H), 7.17 (td,  $J = 8.3, 1.9$  Hz, 1H);  $^{13}\text{C}$  NMR (151 MHz,  $\text{CDCl}_3$ )  $\delta$  162.6 (d,  $J = 249.2$  Hz), 161.7, 150.2 (d,  $J = 9.1$  Hz), 134.9, 131.3, 130.4 (d,  $J = 7.6$  Hz), 130.2, 129.2, 128.7, 117.1 (d,  $J = 3.0$  Hz), 117.0 (d,  $J = 21.1$  Hz), 109.9 (d,  $J = 25.7$ ). HRMS (ESI $^+$ )  $m/z$ : calcd for  $[\text{M}+\text{H}]^+\text{C}_{13}\text{H}_{11}\text{FNO}$ : 216.0819, found: 216.0827.

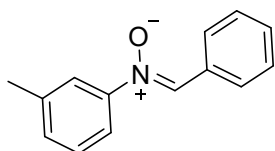

Compound **1aa**: Yield 65% from column chromatography ( $\text{SiO}_2$ , PE/EA = 5:1 v/v),  $^1\text{H}$  NMR (600 MHz,  $\text{CDCl}_3$ )  $\delta$  8.42 – 8.34 (m, 2H), 7.90 (s, 1H), 7.59 (d,  $J = 1.9$  Hz, 1H), 7.52 (dd,  $J = 8.0, 2.1$  Hz, 1H), 7.49 – 7.43 (m, 3H), 7.33 (t,  $J = 7.8$  Hz, 1H), 7.25 (d,  $J = 7.6$  Hz, 1H), 2.41 (s, 3H);  $^{13}\text{C}$  NMR (151 MHz,  $\text{CDCl}_3$ )  $\delta$  148.9, 139.3, 134.5, 130.8, 130.5, 128.9, 128.8, 128.5, 122.3, 118.6, 21.3; HRMS (ESI $^+$ )  $m/z$ : calcd for  $[\text{M}+\text{H}]^+\text{C}_{14}\text{H}_{14}\text{NO}$ : 212.1070, found: 212.1076.

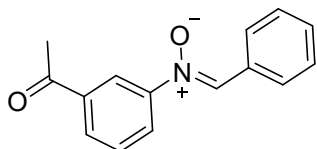

Compound **1ab**: Yield 56% from column chromatography ( $\text{SiO}_2$ , PE/EA = 2:1 v/v),  $^1\text{H}$  NMR (600 MHz,  $\text{CDCl}_3$ )  $\delta$  8.40 (dd,  $J = 6.8, 3.1$  Hz, 2H), 8.34 (t,  $J = 1.9$  Hz, 1H), 8.06 – 8.01 (m, 2H), 8.00 (s, 1H), 7.59 (t,  $J = 7.9$  Hz, 1H), 7.51 – 7.46 (m, 3H), 2.65 (s, 3H);  $^{13}\text{C}$  NMR (151 MHz,  $\text{CDCl}_3$ )  $\delta$  196.7, 149.1, 137.7, 135.0, 131.3, 130.2, 129.6, 129.5, 129.2, 128.7, 126.1, 121.2, 26.8.; HRMS (ESI $^+$ )  $m/z$ : calcd for  $[\text{M}+\text{H}]^+\text{C}_{15}\text{H}_{14}\text{NO}_2$ : 240.1019, found: 240.1025.

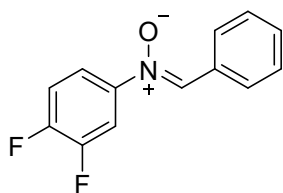

Compound **1ac**: Yield 47% from recrystallization,  $^1\text{H}$  NMR (600 MHz,  $\text{CDCl}_3$ )  $\delta$  8.45 – 8.33 (m, 2H), 7.90 (s, 1H), 7.75 (ddd,  $J = 10.4, 6.9, 2.7$  Hz, 1H), 7.59 – 7.53 (m, 1H), 7.53 – 7.47 (m, 3H), 7.32 – 7.27 (m, 1H);  $^{13}\text{C}$  NMR (151 MHz,  $\text{CDCl}_3$ )  $\delta$  151.0 (dd,  $J = 252.8, 12.5$  Hz), 150.0 (dd,  $J = 251.2, 12.9$  Hz), 145.1 (dd,  $J = 6.6, 3.4$  Hz), 134.7, 131.4, 130.1, 129.1, 128.7, 117.6 (dd,  $J = 6.9, 3.9$  Hz), 117.5 (d,  $J = 18.9$  Hz), 112.1 (d,  $J = 21.1$  Hz); HRMS (ESI<sup>+</sup>)  $m/z$ : calcd for  $[\text{M}+\text{H}]^+\text{C}_{13}\text{H}_{10}\text{F}_2\text{NO}$ : 234.0725, found: 234.0732.

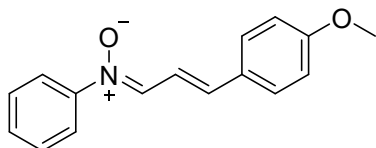

Compound **1ad**: Yield 53% from recrystallization,  $^1\text{H}$  NMR (600 MHz,  $\text{CDCl}_3$ )  $\delta$  7.80 (dd,  $J = 9.7, 0.9$  Hz, 1H), 7.77 – 7.70 (m, 2H), 7.58 (dd,  $J = 16.2, 9.7$  Hz, 1H), 7.55 – 7.47 (m, 2H), 7.48 – 7.39 (m, 3H), 7.10 (d,  $J = 16.2$  Hz, 1H), 6.93 – 6.86 (m, 2H), 3.82 (s, 3H);  $^{13}\text{C}$  NMR (151 MHz,  $\text{CDCl}_3$ )  $\delta$  160.7, 147.3, 139.9, 136.7, 129.7, 129.1, 129.0, 128.8, 121.3, 116.9, 114.3, 55.3; HRMS (ESI<sup>+</sup>)  $m/z$ : calcd for  $[\text{M}+\text{H}]^+\text{C}_{16}\text{H}_{16}\text{NO}_2$ : 254.1176, found: 254.1179.

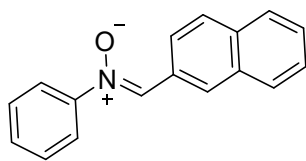

Compound **1ae**: Yield 42% from recrystallization,  $^1\text{H}$  NMR (600 MHz,  $\text{CDCl}_3$ )  $\delta$  8.09 (s, 1H), 8.04 – 7.97 (m, 2H), 7.90 (d,  $J = 8.7$  Hz, 1H), 7.84 (ddd,  $J = 8.0, 6.3, 1.3$  Hz, 3H), 7.60 – 7.46 (m, 6H); LRMS (ESI<sup>+</sup>)  $m/z$ : calcd for  $[\text{M}+\text{H}]^+\text{C}_{17}\text{H}_{14}\text{NO}$ : 248.1, found: 248.3.

Analytical data of compound **1ae** were identical to previously reported values.<sup>[4]</sup>

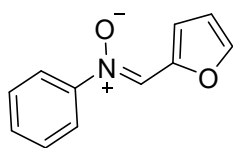

Compound **1af**: Yield 51% from recrystallization,  $^1\text{H}$  NMR (600 MHz,  $\text{CDCl}_3$ )  $\delta$  8.15

(s, 1H), 8.00 (d,  $J = 3.6$  Hz, 1H), 7.78 (d,  $J = 7.6$  Hz, 2H), 7.57 (s, 1H), 7.52 – 7.36 (m, 3H), 6.63 (s, 1H);  $^{13}\text{C}$  NMR (151 MHz,  $\text{CDCl}_3$ )  $\delta$  147.4, 147.1, 144.6, 129.9, 129.1, 124.3, 120.9, 116.4, 112.6; HRMS ( $\text{ESI}^+$ )  $m/z$ : calcd for  $[\text{M}+\text{H}]^+ \text{C}_{11}\text{H}_9\text{NO}_2$ : 188.0706, found: 188.0709.

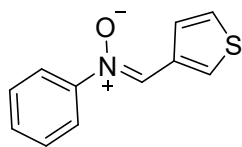

Compound **1ag**: Yield 53% from recrystallization,  $^1\text{H}$  NMR (600 MHz,  $\text{CDCl}_3$ )  $\delta$  9.15 (s, 1H), 8.06 (s, 1H), 7.76 (d,  $J = 7.3$  Hz, 2H), 7.45 (p,  $J = 6.3, 5.5$  Hz, 4H), 7.36 (s, 1H);  $^{13}\text{C}$  NMR (151 MHz,  $\text{CDCl}_3$ )  $\delta$  147.9, 131.4, 129.8, 129.8, 129.1, 128.1, 125.4, 121.4; HRMS ( $\text{ESI}^+$ )  $m/z$ : calcd for  $[\text{M}+\text{H}]^+ \text{C}_{11}\text{H}_9\text{NOS}$ : 204.0478, found: 204.0475.

## Optimization of reaction conditions

Table S1. Optimization of reaction conditions<sup>a</sup>

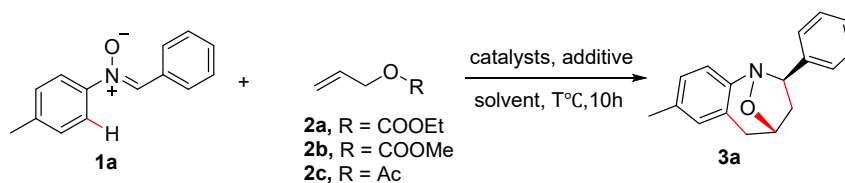

| Entry          | Allyl precursor | Catalysts                                                                 | Additive (equiv.)                     | Solvent            | T (°C) | Yield (%) <sup>c</sup> |
|----------------|-----------------|---------------------------------------------------------------------------|---------------------------------------|--------------------|--------|------------------------|
| 1 <sup>b</sup> | 2a              | [Cp*Rh(CH <sub>3</sub> CN) <sub>3</sub> ](SbF <sub>6</sub> ) <sub>2</sub> | AgOAc (2.0)                           | DCE                | r.t.   | 0                      |
| 2 <sup>b</sup> | 2a              | [Cp*Rh(CH <sub>3</sub> CN) <sub>3</sub> ](SbF <sub>6</sub> ) <sub>2</sub> | AgOAc (2.0)                           | DCE                | 80     | 43                     |
| 3 <sup>b</sup> | 2a              | [Cp*Rh(CH <sub>3</sub> CN) <sub>3</sub> ](SbF <sub>6</sub> ) <sub>2</sub> | AgOAc (2.0)                           | DCE                | 120    | 55                     |
| 4 <sup>b</sup> | 2b              | [Cp*Rh(CH <sub>3</sub> CN) <sub>3</sub> ](SbF <sub>6</sub> ) <sub>2</sub> | AgOAc (2.0)                           | DCE                | 120    | 49                     |
| 5 <sup>b</sup> | 2c              | [Cp*Rh(CH <sub>3</sub> CN) <sub>3</sub> ](SbF <sub>6</sub> ) <sub>2</sub> | AgOAc (2.0)                           | DCE                | 120    | 30                     |
| 6              | 2a              | [Cp*Rh(CH <sub>3</sub> CN) <sub>3</sub> ](SbF <sub>6</sub> ) <sub>2</sub> | AgOAc (2.0)                           | DCE                | 120    | 61                     |
| 7              | 2a              | 2.5% [Cp*RhCl <sub>2</sub> ] <sub>2</sub> /10%<br>AgSbF <sub>6</sub>      | AgOAc (2.0)                           | DCE                | 120    | 56                     |
| 8              | 2a              | -                                                                         | AgOAc (2.0)                           | DCE                | 120    | 0                      |
| 9              | 2a              | [Cp*Rh(CH <sub>3</sub> CN) <sub>3</sub> ](SbF <sub>6</sub> ) <sub>2</sub> | -                                     | DCE                | 120    | 0                      |
| 10             | 2a              | [Cp*Rh(CH <sub>3</sub> CN) <sub>3</sub> ](SbF <sub>6</sub> ) <sub>2</sub> | Cu(OAc) <sub>2</sub> (2.0)            | DCE                | 120    | 0                      |
| 11             | 2a              | [Cp*Rh(CH <sub>3</sub> CN) <sub>3</sub> ](SbF <sub>6</sub> ) <sub>2</sub> | Ag <sub>2</sub> CO <sub>3</sub> (2.0) | DCE                | 120    | < 10                   |
| 12             | 2a              | [Cp*Rh(CH <sub>3</sub> CN) <sub>3</sub> ](SbF <sub>6</sub> ) <sub>2</sub> | Ag <sub>2</sub> O (2.0)               | DCE                | 120    | < 10                   |
| 13             | 2a              | [Cp*Rh(CH <sub>3</sub> CN) <sub>3</sub> ](SbF <sub>6</sub> ) <sub>2</sub> | AgF (2.0)                             | DCE                | 120    | < 5                    |
| 14             | 2a              | [Cp*Rh(CH <sub>3</sub> CN) <sub>3</sub> ](SbF <sub>6</sub> ) <sub>2</sub> | CsOAc (2.0)                           | DCE                | 120    | 20                     |
| 15             | 2a              | [Cp*Rh(CH <sub>3</sub> CN) <sub>3</sub> ](SbF <sub>6</sub> ) <sub>2</sub> | PivOH (2.0)                           | DCE                | 120    | < 10                   |
| 16             | 2a              | [Cp*Rh(CH <sub>3</sub> CN) <sub>3</sub> ](SbF <sub>6</sub> ) <sub>2</sub> | NaOAc (2.0)                           | DCE                | 120    | 18                     |
| 17             | 2a              | [Cp*Rh(CH <sub>3</sub> CN) <sub>3</sub> ](SbF <sub>6</sub> ) <sub>2</sub> | AgOAc (0.5)                           | DCE                | 120    | 28                     |
| 18             | 2a              | [Cp*Rh(CH <sub>3</sub> CN) <sub>3</sub> ](SbF <sub>6</sub> ) <sub>2</sub> | AgOAc (1.0)                           | DCE                | 120    | 54                     |
| 19             | 2a              | [Cp*Rh(CH <sub>3</sub> CN) <sub>3</sub> ](SbF <sub>6</sub> ) <sub>2</sub> | AgOAc (1.5)                           | DCE                | 120    | 61                     |
| 20             | 2a              | [Cp*Rh(CH <sub>3</sub> CN) <sub>3</sub> ](SbF <sub>6</sub> ) <sub>2</sub> | AgOAc (1.5)                           | toluene            | 120    | 41                     |
| 21             | 2a              | [Cp*Rh(CH <sub>3</sub> CN) <sub>3</sub> ](SbF <sub>6</sub> ) <sub>2</sub> | AgOAc (1.5)                           | PhCF <sub>3</sub>  | 120    | 47                     |
| 22             | 2a              | [Cp*Rh(CH <sub>3</sub> CN) <sub>3</sub> ](SbF <sub>6</sub> ) <sub>2</sub> | AgOAc (1.5)                           | PhCl               | 120    | 65                     |
| 23             | 2a              | [Cp*Rh(CH <sub>3</sub> CN) <sub>3</sub> ](SbF <sub>6</sub> ) <sub>2</sub> | AgOAc (1.5)                           | 1,4-dioxane        | 120    | 46                     |
| 24             | 2a              | [Cp*Rh(CH <sub>3</sub> CN) <sub>3</sub> ](SbF <sub>6</sub> ) <sub>2</sub> | AgOAc (1.5)                           | CH <sub>3</sub> CN | 120    | < 10                   |
| 25             | 2a              | [Cp*Rh(CH <sub>3</sub> CN) <sub>3</sub> ](SbF <sub>6</sub> ) <sub>2</sub> | AgOAc (1.5)                           | TFE                | 120    | 19                     |
| 26             | 2a              | [Cp*Rh(CH <sub>3</sub> CN) <sub>3</sub> ](SbF <sub>6</sub> ) <sub>2</sub> | AgOAc (1.5)                           | DMF                | 120    | < 10                   |
| 27             | 2a              | [Cp*Rh(CH <sub>3</sub> CN) <sub>3</sub> ](SbF <sub>6</sub> ) <sub>2</sub> | AgOAc (1.5)                           | DMSO               | 120    | < 10                   |

[a] Reaction conditions: 1a (0.3 mmol), 2 (0.2 mmol), additive (0.3 mmol) and solvent (2 mL) was stirred at indicated temperature for 10 h; [b] 1a (0.2 mmol), 2 (0.3 mmol), catalyst (5 mol%), additive (0.4 mmol) and solvent (2 mL) was stirred at indicated temperature for 10 h; [c] Yield of isolated product. PhCF<sub>3</sub>: benzenetri-fluoride; PhCl: chlorobenzene.

Table S1-1. Screening of temperature<sup>a</sup>

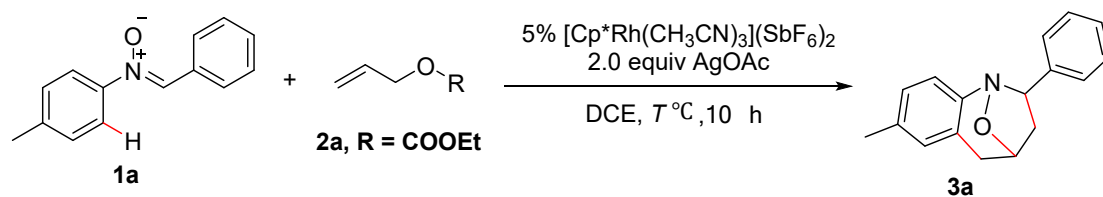

| Entry    | T(°C)      | Yield (%) <sup>c</sup> |
|----------|------------|------------------------|
| 1        | r.t.       | 0                      |
| 2        | 80         | 43                     |
| <b>3</b> | <b>120</b> | <b>55</b>              |

[a] Reaction conditions: **1a** (0.2 mmol), **2a** (0.3 mmol), [Cp\*Rh(CH<sub>3</sub>CN)<sub>3</sub>](SbF<sub>6</sub>)<sub>2</sub> (5 mol%), AgOAc (0.4 mmol) and DCE (2 mL) was stirred at indicated temperature for 10 h; [b] Yield of isolated product.

Table S1-2. Screening of allyl precursor<sup>a</sup>

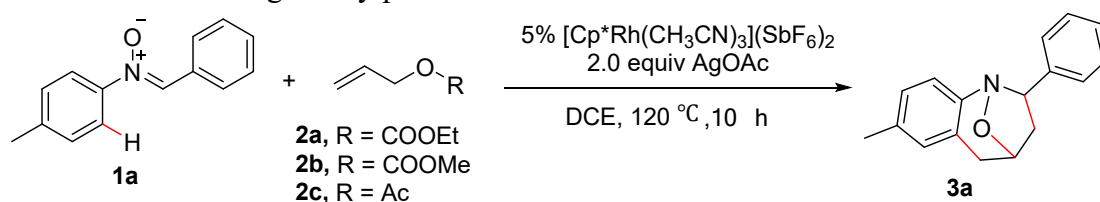

| Entry    | Allyl precursor | Yield (%) <sup>b</sup> |
|----------|-----------------|------------------------|
| <b>3</b> | <b>2a</b>       | <b>55</b>              |
| 4        | <b>2b</b>       | 49                     |
| 5        | <b>2c</b>       | 30                     |

[a] Reaction conditions: **1a** (0.2 mmol), **2** (0.3 mmol), [Cp\*Rh(CH<sub>3</sub>CN)<sub>3</sub>](SbF<sub>6</sub>)<sub>2</sub> (5 mol%), AgOAc (0.4 mmol) and DCE (2 mL) was stirred at 120 °C for 10 h; [b] Yield of isolated product.

Table S1-3. Screening of substrate ratio<sup>a</sup>

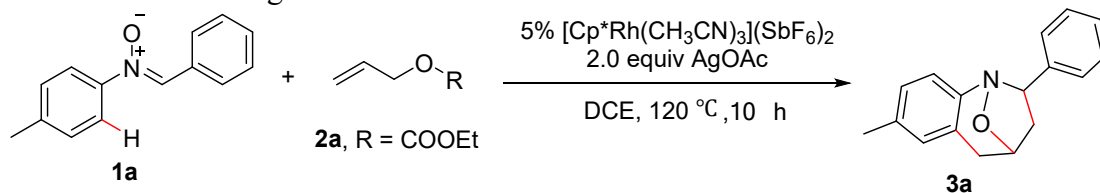

| Entry | <b>1a</b> (mmol) | <b>2a</b> (mmol) | Yield (%) <sup>b</sup> |
|-------|------------------|------------------|------------------------|
| 3     | 0.2              | 0.3              | 55                     |

[a] Reaction conditions: 1a, 2a, [Cp\*Rh(CH<sub>3</sub>CN)<sub>3</sub>](SbF<sub>6</sub>)<sub>2</sub> (5 mol%), AgOAc (0.4 mmol) and DCE (2 mL) was stirred at 120 °C for 10 h; [b] Yield of isolated product.

Table S1-4. Screening of catalyst<sup>a</sup>

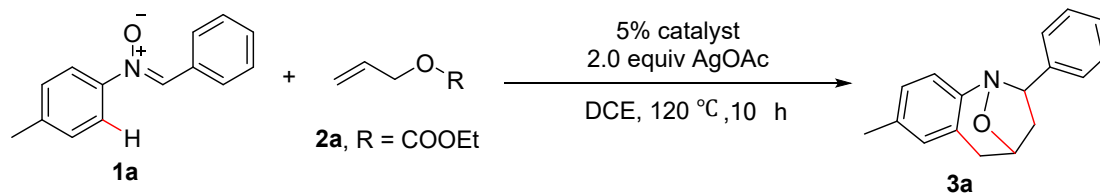

| Entry | Catalyst                                                                  | Yield (%) <sup>c</sup> |
|-------|---------------------------------------------------------------------------|------------------------|
| 6     | [Cp*Rh(CH <sub>3</sub> CN) <sub>3</sub> ](SbF <sub>6</sub> ) <sub>2</sub> | 61                     |
| 7     | 2.5% [Cp*RhCl <sub>2</sub> ] <sub>2</sub> /10% AgSbF <sub>6</sub>         | 56                     |
| 8     | none                                                                      | 0                      |

[a] Reaction conditions: 1a (0.3 mmol), 2a (0.2 mmol), catalyst (5 mol%), AgOAc (0.4 mmol) and DCE (2 mL) was stirred at 120 °C for 10 h; [b] Yield of isolated product.

Table S1-5. Screening of additive<sup>a</sup>

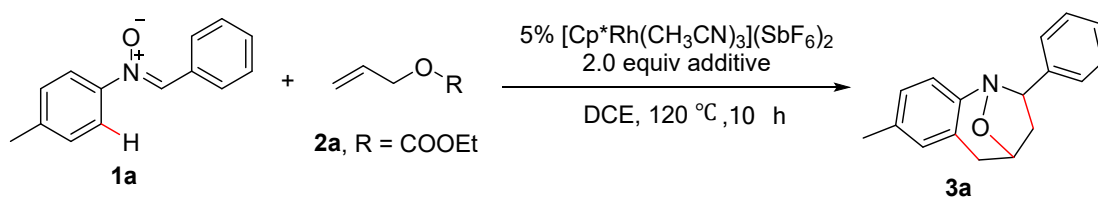

| Entry | additive                        | Yield (%) <sup>b</sup> |
|-------|---------------------------------|------------------------|
| 6     | AgOAc                           | 61                     |
| 9     | none                            | 0                      |
| 10    | Cu(OAc) <sub>2</sub>            | 0                      |
| 11    | Ag <sub>2</sub> CO <sub>3</sub> | < 10                   |
| 12    | Ag <sub>2</sub> O               | < 10                   |
| 13    | AgF                             | < 5                    |
| 14    | CsOAc                           | 20                     |
| 15    | PivOH                           | < 10                   |
| 16    | NaOAc                           | 18                     |

[a] Reaction conditions: 1a (0.3 mmol), 2 (0.2 mmol), [Cp\*Rh(CH<sub>3</sub>CN)<sub>3</sub>](SbF<sub>6</sub>)<sub>2</sub> (5 mol%), additive (0.4 mmol) and DCE (2 mL) was stirred at 120 °C for 10 h; [b] Yield of isolated product.

Table S1-6. Screening of AgOAc equivalent<sup>a</sup>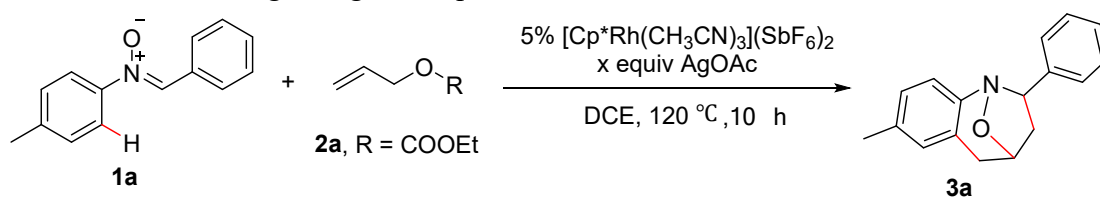

| Entry     | AgOAc equivalent | Yield (%) <sup>b</sup> |
|-----------|------------------|------------------------|
| <b>6</b>  | <b>2.0</b>       | <b>61</b>              |
| <b>17</b> | 0.5              | 28                     |
| <b>18</b> | 1.0              | 54                     |
| <b>19</b> | <b>1.5</b>       | <b>61</b>              |

[a] Reaction conditions: **1a** (0.3 mmol), **2** (0.2 mmol),  $[\text{Cp}^*\text{Rh}(\text{CH}_3\text{CN})_3](\text{SbF}_6)_2$  (5 mol%), AgOAc and DCE (2 mL) was stirred at  $120\text{ }^\circ\text{C}$  for 10 h; [b] Yield of isolated product.

Table S1-7. Screening of solvent<sup>a</sup>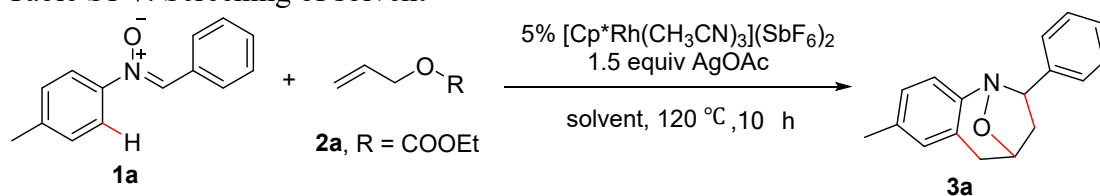

| Entry     | Solvent                | Yield (%) <sup>b</sup> |
|-----------|------------------------|------------------------|
| <b>19</b> | DCE                    | 61                     |
| <b>20</b> | toluene                | 41                     |
| <b>21</b> | $\text{PhCF}_3$        | 47                     |
| <b>22</b> | <b>PhCl</b>            | <b>65</b>              |
| <b>23</b> | 1,4-dioxane            | 46                     |
| <b>24</b> | $\text{CH}_3\text{CN}$ | < 10                   |
| <b>25</b> | TFE                    | 19                     |
| <b>26</b> | DMF                    | < 10                   |
| <b>27</b> | DMSO                   | < 10                   |

[a] Reaction conditions: **1a** (0.3 mmol), **2** (0.2 mmol),  $[\text{Cp}^*\text{Rh}(\text{CH}_3\text{CN})_3](\text{SbF}_6)_2$  (5 mol%), AgOAc (0.3 mmol) and solvent (2 mL) was stirred at  $120\text{ }^\circ\text{C}$  for 10 h; [b] Yield of isolated product.



**General procedure for the synthesis of 3 (taking 3a as an example):**

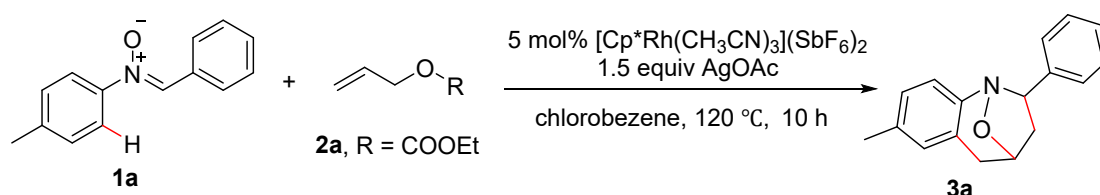

$[\text{Cp}^*\text{Rh}(\text{CH}_3\text{CN})_3](\text{SbF}_6)_2$  (8 mg, 0.01 mmol, 5% equiv), AgOAc (50 mg, 0.3 mmol, 1.5 equiv), nitron **1a** (63 mg, 0.3 mmol, 1.5 equiv), the allyl precursor **2a** (26 mg, 0.2 mmol, 1.0 equiv) and chlorobenzene (2 mL) were added to a test tube. The reaction mixture was stirred at 120 °C for 10 h. After cooling to room temperature, the reaction mixture was filtered through a pad of celite washing with  $\text{CH}_2\text{Cl}_2$ . The solvents were removed under reduced pressure and the crude reaction mixture was purified by column chromatography on silica gel using PE/EA (20:1) as eluents to afford the title compound **3a**.

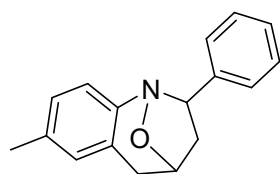

Compound **3a**: Yield 65%,  $^1\text{H}$  NMR (600 MHz,  $\text{CDCl}_3$ )  $\delta$  7.53 – 7.41 (m, 2H), 7.41 – 7.32 (m, 2H), 7.27 – 7.24 (m, 1H), 6.97 (d,  $J = 1.2$  Hz, 2H), 6.94 (q,  $J = 1.1$  Hz, 1H), 4.98 – 4.90 (m, 1H), 4.63 – 4.53 (m, 1H), 3.38 (dd,  $J = 16.5, 5.4$  Hz, 1H), 2.68 – 2.57 (m, 2H), 2.51 (d,  $J = 16.5$  Hz, 1H), 2.31 (s, 3H);  $^{13}\text{C}$  NMR (151 MHz,  $\text{CDCl}_3$ )  $\delta$  148.2, 143.9, 135.5, 130.3, 128.5, 127.2, 126.9, 126.4, 124.9, 121.8, 75.5, 75.1, 42.5, 34.7, 21.0; HRMS (ESI<sup>+</sup>)  $m/z$ : calcd for  $[\text{M}+\text{Na}]^+\text{C}_{17}\text{H}_{18}\text{NO}$ : 252.1383, found: 252.1391.

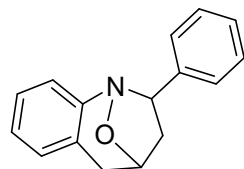

Compound **3b**: Yield 57%,  $^1\text{H}$  NMR (600 MHz,  $\text{CDCl}_3$ )  $\delta$  7.47 (d,  $J = 7.4$  Hz, 2H), 7.36 (t,  $J = 7.7$  Hz, 2H), 7.27 (t,  $J = 7.4$  Hz, 1H), 7.21 – 7.11 (m, 3H), 7.11 – 7.06 (m, 1H), 4.97 (ddd,  $J = 8.0, 4.7, 2.6$  Hz, 1H), 4.63 (dd,  $J = 7.7, 3.6$  Hz, 1H), 3.43 (dd,  $J = 16.5, 5.3$  Hz, 1H), 2.66 – 2.58 (m, 2H), 2.56 (d,  $J = 16.5$  Hz, 1H);  $^{13}\text{C}$  NMR (151

MHz, CDCl<sub>3</sub>)  $\delta$  150.6, 143.7, 129.8, 128.5, 126.9, 126.6, 126.4, 125.9, 125.2, 122.0, 75.4, 75.1, 42.5, 34.7; HRMS (ESI<sup>+</sup>) *m/z*: calcd for [M+H]<sup>+</sup>C<sub>16</sub>H<sub>16</sub>NO: 238.1226, found: 238.1253.

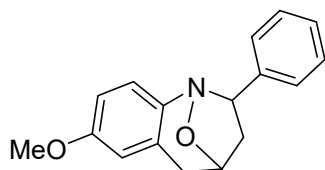

Compound **3c**: Yield 47%, <sup>1</sup>H NMR (600 MHz, CDCl<sub>3</sub>)  $\delta$  7.52 – 7.43 (m, 2H), 7.36 (t, *J* = 7.7 Hz, 2H), 7.31 – 7.21 (m, 1H), 7.02 (d, *J* = 8.6 Hz, 1H), 6.71 (dd, *J* = 8.6, 2.9 Hz, 1H), 6.67 (d, *J* = 2.8 Hz, 1H), 4.94 (td, *J* = 5.8, 3.8 Hz, 1H), 4.56 (dd, *J* = 6.9, 4.5 Hz, 1H), 3.79 (s, 3H), 3.40 (dd, *J* = 16.6, 5.4 Hz, 1H), 2.64 – 2.56 (m, 2H), 2.53 (d, *J* = 16.6 Hz, 1H); <sup>13</sup>C NMR (151 MHz, CDCl<sub>3</sub>)  $\delta$  157.5, 143.8, 143.8, 128.4, 126.9, 126.4, 126.3, 122.9, 114.6, 112.0, 75.5, 74.8, 55.4, 42.5, 35.0; HRMS (ESI<sup>+</sup>) *m/z*: calcd for [M+H]<sup>+</sup>C<sub>17</sub>H<sub>18</sub>NO<sub>2</sub>: 268.1332, found: 268.1266.

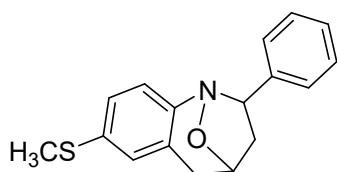

Compound **3d**: Yield 44%, <sup>1</sup>H NMR (600 MHz, CDCl<sub>3</sub>)  $\delta$  7.46 (dd, *J* = 8.0, 1.4 Hz, 2H), 7.36 (t, *J* = 7.7 Hz, 2H), 7.32 – 7.21 (m, 1H), 7.08 (dd, *J* = 8.3, 2.1 Hz, 1H), 7.06 – 6.96 (m, 2H), 4.95 (ddd, *J* = 7.6, 5.4, 2.3 Hz, 1H), 4.58 (dd, *J* = 8.2, 3.2 Hz, 1H), 3.39 (dd, *J* = 16.6, 5.4 Hz, 1H), 2.66 – 2.55 (m, 2H), 2.53 (d, *J* = 16.6 Hz, 1H), 2.47 (s, 3H); <sup>13</sup>C NMR (151 MHz, CDCl<sub>3</sub>)  $\delta$  148.2, 143.6, 135.5, 128.5, 128.2, 127.0, 126.4, 126.0, 125.3, 122.5, 75.4, 74.9, 42.5, 34.7, 16.4; HRMS (ESI<sup>+</sup>) *m/z*: calcd for [M+Na]<sup>+</sup>C<sub>17</sub>H<sub>17</sub>NOSNa: 306.0923, found: 306.0934.

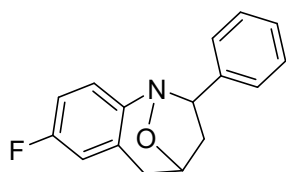

Compound **3e**: Yield 63%, <sup>1</sup>H NMR (600 MHz, CDCl<sub>3</sub>)  $\delta$  7.49 – 7.42 (m, 2H), 7.36 (dd, *J* = 8.5, 7.0 Hz, 2H), 7.32 – 7.25 (m, 1H), 7.05 (dd, *J* = 8.5, 5.2 Hz, 1H), 6.90 – 6.82 (m, 2H), 5.03 – 4.88 (m, 1H), 4.58 (dd, *J* = 8.3, 3.1 Hz, 1H), 3.41 (dd, *J* = 16.8, 5.5 Hz, 1H), 2.66 – 2.56 (m, 2H), 2.58 – 2.51 (m, 1H); <sup>13</sup>C NMR (151 MHz, CDCl<sub>3</sub>)  $\delta$  160.45(d, *J* = 244.0 Hz), 146.4(d, *J* = 2.7 Hz), 143.5, 128.5, 127.3(d, *J* = 8.3 Hz), 127.0, 126.3, 123.5(d, *J* = 8.5 Hz), 116.1(d, *J* = 22.7 Hz), 113.5(d, *J* = 22.7 Hz), 75.4, 74.5, 42.5, 34.8; HRMS (ESI<sup>+</sup>) *m/z*: calcd for [M+H]<sup>+</sup>C<sub>16</sub>H<sub>15</sub>FNO: 256.1132, found: 256.1121.

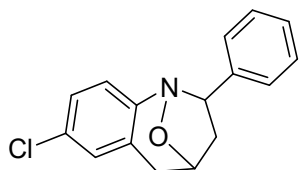

Compound **3f**: Yield 66%,  $^1\text{H NMR}$  (600 MHz,  $\text{CDCl}_3$ )  $\delta$  7.48 – 7.41 (m, 2H), 7.36 (dd,  $J = 8.5, 7.0$  Hz, 2H), 7.29 – 7.26 (m, 1H), 7.17 – 7.11 (m, 2H), 7.02 (d,  $J = 8.1$  Hz, 1H), 4.95 (ddd,  $J = 7.5, 5.3, 2.0$  Hz, 1H), 4.58 (dd,  $J = 8.5, 2.9$  Hz, 1H), 3.39 (ddd,  $J = 16.8, 5.5, 1.2$  Hz, 1H), 2.67 – 2.55 (m, 2H), 2.53 (d,  $J = 16.7$  Hz, 1H);  $^{13}\text{C NMR}$  (151 MHz,  $\text{CDCl}_3$ )  $\delta$  148.10, 142.34, 130.12, 128.62, 127.50, 126.22, 126.07, 125.76, 125.33, 122.33, 74.35, 73.60, 41.48, 33.56; HRMS (ESI $^+$ )  $m/z$ : calcd for  $[\text{M}+\text{H}]^+\text{C}_{16}\text{H}_{15}\text{ClNO}$ : 272.0837, found: 272.0842.

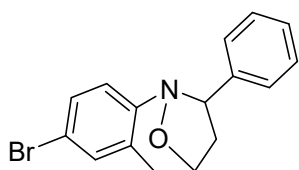

Compound **3g**: Yield 61%,  $^1\text{H NMR}$  (600 MHz,  $\text{CDCl}_3$ )  $\delta$  7.51 – 7.42 (m, 2H), 7.36 (t,  $J = 7.7$  Hz, 2H), 7.32 – 7.24 (m, 3H), 7.06 – 6.93 (m, 1H), 5.05 – 4.76 (m, 1H), 4.58 (dd,  $J = 8.5, 2.9$  Hz, 1H), 3.40 (ddd,  $J = 16.7, 5.4, 1.2$  Hz, 1H), 2.73 – 2.46 (m, 3H);  $^{13}\text{C NMR}$  (151 MHz,  $\text{CDCl}_3$ )  $\delta$  149.6, 143.3, 132.6, 129.7, 128.5, 127.7, 127.1, 126.3, 123.7, 118.9, 75.3, 74.6, 42.5, 34.5; HRMS (ESI $^+$ )  $m/z$ : calcd for  $[\text{M}+\text{H}]^+\text{C}_{16}\text{H}_{15}\text{BrNO}$ : 316.0332, found: 316.0338.

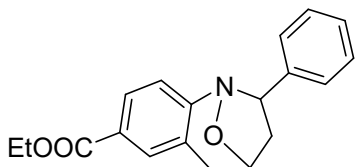

Compound **3h**: Yield 63%,  $^1\text{H NMR}$  (600 MHz,  $\text{CDCl}_3$ )  $\delta$  7.89 – 7.83 (m, 2H), 7.51 – 7.44 (m, 2H), 7.37 (t,  $J = 7.7$  Hz, 2H), 7.30 – 7.26 (m, 1H), 7.13 (d,  $J = 8.0$  Hz, 1H), 4.99 (ddd,  $J = 7.4, 5.3, 1.9$  Hz, 1H), 4.64 (dd,  $J = 8.6, 2.6$  Hz, 1H), 4.37 (q,  $J = 7.1$  Hz, 2H), 3.55 – 3.39 (m, 1H), 2.66 (dddd,  $J = 12.9, 7.7, 2.8, 1.2$  Hz, 1H), 2.63 – 2.55 (m, 2H), 1.39 (dd,  $J = 7.4, 6.7$  Hz, 3H);  $^{13}\text{C NMR}$  (151 MHz,  $\text{CDCl}_3$ )  $\delta$  166.2, 154.6, 143.2, 131.4, 128.5, 128.2, 128.1, 127.1, 126.3, 125.5, 121.9, 75.3, 74.8, 61.0, 42.5, 34.6, 14.3; HRMS (ESI $^+$ )  $m/z$ : calcd for  $[\text{M}+\text{H}]^+\text{C}_{19}\text{H}_{20}\text{NO}_3$ : 310.1438, found: 310.1483.

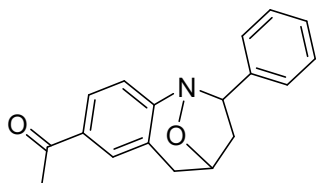

Compound **3i**: Yield 67%,  $^1\text{H}$  NMR (600 MHz,  $\text{CDCl}_3$ )  $\delta$  7.87 – 7.70 (m, 2H), 7.55 – 7.43 (m, 2H), 7.40 – 7.34 (m, 2H), 7.32 – 7.25 (m, 1H), 7.21 – 7.12 (m, 1H), 5.00 (ddd,  $J = 7.5, 5.3, 1.9$  Hz, 1H), 4.64 (dd,  $J = 8.6, 2.7$  Hz, 1H), 3.52 – 3.42 (m, 1H), 2.67 (dddd,  $J = 12.8, 7.7, 2.8, 1.2$  Hz, 1H), 2.65 – 2.55 (m, 5H);  $^{13}\text{C}$  NMR (151 MHz,  $\text{CDCl}_3$ )  $\delta$  197.4, 154.9, 143.1, 134.9, 130.2, 128.5, 127.2, 127.1, 126.3, 125.8, 122.0, 75.2, 74.8, 42.4, 34.7, 26.6; HRMS (ESI<sup>+</sup>)  $m/z$ : calcd for  $[\text{M}+\text{Na}]^+\text{C}_{18}\text{H}_{17}\text{NO}_2\text{Na}$ : 302.1152, found: 302.1156.

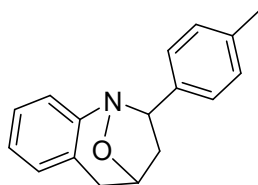

Compound **3j**: Yield 70%,  $^1\text{H}$  NMR (600 MHz,  $\text{CDCl}_3$ )  $\delta$  7.42 – 7.33 (m, 2H), 7.23 – 7.12 (m, 5H), 7.08 (dd,  $J = 7.3, 1.3$  Hz, 1H), 4.97 (ddd,  $J = 7.7, 5.4, 2.4$  Hz, 1H), 4.60 (dd,  $J = 8.1, 3.2$  Hz, 1H), 3.42 (dd,  $J = 16.5, 5.3$  Hz, 1H), 2.66 – 2.57 (m, 2H), 2.55 (d,  $J = 16.5$  Hz, 1H), 2.35 (s, 3H);  $^{13}\text{C}$  NMR (151 MHz,  $\text{CDCl}_3$ )  $\delta$  150.6, 140.8, 136.6, 129.8, 129.1, 126.5, 126.3, 125.9, 125.2, 121.9, 75.3, 75.0, 42.4, 34.7, 21.0; HRMS (ESI<sup>+</sup>)  $m/z$ : calcd for  $[\text{M}+\text{H}]^+\text{C}_{17}\text{H}_{18}\text{NO}$ : 252.1383, found: 252.1358.

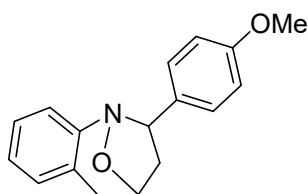

Compound **3k**: Yield 46%,  $^1\text{H}$  NMR (600 MHz,  $\text{CDCl}_3$ )  $\delta$  7.48 – 7.35 (m, 2H), 7.21 – 7.11 (m, 3H), 7.09 (dd,  $J = 7.3, 1.3$  Hz, 1H), 6.95 – 6.81 (m, 2H), 4.98 (ddd,  $J = 7.5, 5.3, 2.3$  Hz, 1H), 4.58 (dd,  $J = 8.1, 3.0$  Hz, 1H), 3.81 (s, 3H), 3.51 – 3.28 (m, 1H), 2.77 – 2.38 (m, 3H);  $^{13}\text{C}$  NMR (151 MHz,  $\text{CDCl}_3$ )  $\delta$  158.57, 150.53, 135.98, 129.88, 129.78, 127.64, 126.53, 125.89, 125.19, 121.94, 113.80, 75.07, 55.31, 42.36, 34.68; HRMS (ESI<sup>+</sup>)  $m/z$ : calcd for  $[\text{M}+\text{H}]^+\text{C}_{17}\text{H}_{18}\text{NO}_2$ : 268.3353, found: 268.3368.

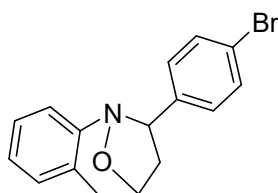

Compound **3l**: Yield 57%,  $^1\text{H}$  NMR (600 MHz,  $\text{CDCl}_3$ )  $\delta$  7.52 – 7.44 (m, 2H), 7.40 – 7.30 (m, 2H), 7.23 – 7.10 (m, 3H), 7.06 (dd,  $J = 7.2, 1.6$  Hz, 1H), 4.95 (ddd,  $J = 7.5, 5.3, 2.0$  Hz, 1H), 4.57 (dd,  $J = 8.5, 2.8$  Hz, 1H), 3.42 (dd,  $J = 16.6, 5.4$  Hz, 1H), 2.65 – 2.50 (m, 3H);  $^{13}\text{C}$  NMR (151 MHz,  $\text{CDCl}_3$ )  $\delta$  150.2, 142.8, 131.5, 129.8, 128.2, 126.6, 126.1, 125.2, 121.9, 120.8, 75.1, 74.7, 42.5, 34.6; HRMS (ESI<sup>+</sup>)  $m/z$ : calcd for  $[\text{M}+\text{H}]^+\text{C}_{16}\text{H}_{15}\text{BrNO}$ : 316.0332, found: 316.0349.

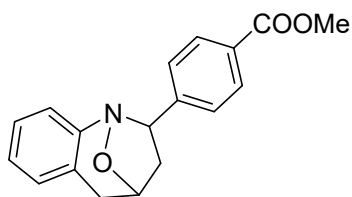

Compound **3m**: Yield 72%,  $^1\text{H}$  NMR (600 MHz,  $\text{CDCl}_3$ )  $\delta$  8.03 (d,  $J = 8.1$  Hz, 2H), 7.54 (d,  $J = 8.1$  Hz, 2H), 7.16 (dtd,  $J = 13.8, 7.1, 4.8$  Hz, 3H), 7.11 – 7.03 (m, 1H), 4.96 (ddd,  $J = 7.7, 5.4, 1.7$  Hz, 1H), 4.66 (dd,  $J = 8.7, 2.8$  Hz, 1H), 3.92 (d,  $J = 0.8$  Hz, 3H), 3.43 (dd,  $J = 16.6, 5.4$  Hz, 1H), 2.72 – 2.50 (m, 3H);  $^{13}\text{C}$  NMR (151 MHz,  $\text{CDCl}_3$ )  $\delta$  167.0, 150.2, 148.8, 129.8, 128.7, 126.6, 126.4, 126.1, 125.2, 121.9, 77.0, 75.1, 74.9, 52.0, 42.6, 34.6; HRMS (ESI<sup>+</sup>)  $m/z$ : calcd for  $[\text{M}+\text{Na}]^+\text{C}_{18}\text{H}_{17}\text{NO}_3\text{Na}$ : 318.1101, found: 318.1112.

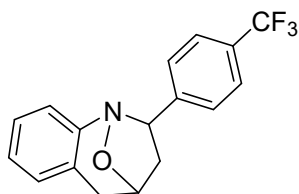

Compound **3n**: Yield 69%,  $^1\text{H}$  NMR (600 MHz,  $\text{CDCl}_3$ )  $\delta$  7.73 – 7.54 (m, 4H), 7.22 – 7.11 (m, 3H), 7.07 (dd,  $J = 7.1, 1.8$  Hz, 1H), 4.97 (ddd,  $J = 7.5, 5.2, 1.9$  Hz, 1H), 4.67 (dd,  $J = 8.7, 2.7$  Hz, 1H), 3.43 (dd,  $J = 16.6, 5.4$  Hz, 1H), 2.66 (ddd,  $J = 12.7, 8.7, 2.0$  Hz, 1H), 2.61 – 2.54 (m, 2H);  $^{13}\text{C}$  NMR (151 MHz,  $\text{CDCl}_3$ )  $\delta$  150.1, 147.6, 129.9, 129.1 (q,  $J = 32.5$  Hz), 126.7, 126.7, 126.2, 125.4 (q,  $J = 3.8$  Hz), 125.2, 124.2 (q,  $J = 271.8$  Hz), 121.9, 75.2, 74.7, 42.6, 34.6; HRMS (ESI<sup>+</sup>)  $m/z$ : calcd for  $[\text{M}+\text{H}]^+\text{C}_{17}\text{H}_{15}\text{F}_3\text{NO}$ : 306.1101, found: 306.1125.

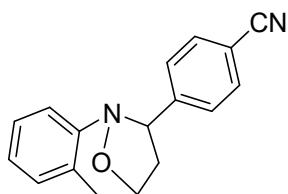

Compound **3o**: Yield 73%,  $^1\text{H}$  NMR (600 MHz,  $\text{CDCl}_3$ )  $\delta$  7.66 – 7.63 (m, 2H), 7.59 (d,  $J = 8.2$  Hz, 2H), 7.22 – 7.11 (m, 3H), 7.11 – 7.02 (m, 1H), 4.96 (ddd,  $J = 7.5, 5.3, 1.7$  Hz, 1H), 4.65 (dd,  $J = 8.8, 2.7$  Hz, 1H), 3.43 (dd,  $J = 16.7, 5.4$  Hz, 1H), 2.66 (ddd,  $J = 12.7, 8.8, 1.9$  Hz, 1H), 2.60 – 2.51 (m, 2H);  $^{13}\text{C}$  NMR (151 MHz,  $\text{CDCl}_3$ )  $\delta$  149.8, 148.9, 132.3, 129.9, 127.1, 126.7, 126.3, 125.1, 121.8, 118.9, 110.7, 75.2, 74.6, 42.6, 34.5; HRMS (ESI<sup>+</sup>)  $m/z$ : calcd for  $[\text{M}+\text{H}]^+\text{C}_{17}\text{H}_{15}\text{N}_2\text{O}$ : 263.1179, found: 263.1185.

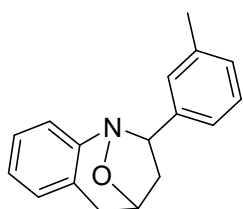

Compound **3p**: Yield 41%,  $^1\text{H}$  NMR (600 MHz,  $\text{CDCl}_3$ )  $\delta$  7.33 (dq,  $J = 1.9, 1.0$  Hz, 1H), 7.25 – 7.21 (m, 2H), 7.19 – 7.15 (m, 1H), 7.15 – 7.12 (m, 2H), 7.08 (dd,  $J = 7.2, 1.3$  Hz, 2H), 4.97 (ddd,  $J = 7.6, 5.4, 2.4$  Hz, 1H), 4.59 (dd,  $J = 8.1, 3.3$  Hz, 1H), 3.43

(dd,  $J = 16.5, 5.4$  Hz, 1H), 2.67 – 2.57 (m, 2H), 2.55 (d,  $J = 16.5$  Hz, 1H), 2.38 (s, 3H);  $^{13}\text{C}$  NMR (151 MHz,  $\text{CDCl}_3$ )  $\delta$  150.7, 143.7, 138.2, 129.8, 128.4, 127.7, 127.0, 126.6, 125.9, 125.3, 123.5, 122.0, 75.4, 75.1, 42.5, 34.7, 21.5; HRMS ( $\text{ESI}^+$ )  $m/z$ : calcd for  $[\text{M}+\text{H}]^+\text{C}_{17}\text{H}_{18}\text{NO}$ : 252.1383, found: 252.1326.

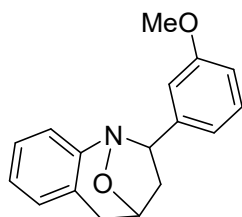

Compound **3q**: Yield 49%,  $^1\text{H}$  NMR (600 MHz,  $\text{CDCl}_3$ )  $\delta$  7.27 (t,  $J = 7.9$  Hz, 1H), 7.20 – 7.14 (m, 1H), 7.16 – 7.10 (m, 2H), 7.08 (dt,  $J = 7.7, 1.5$  Hz, 2H), 7.02 (dp,  $J = 7.6, 0.7$  Hz, 1H), 6.81 (ddd,  $J = 8.2, 2.6, 0.9$  Hz, 1H), 4.96 (ddd,  $J = 7.9, 5.5, 3.0$  Hz, 1H), 4.67 – 4.54 (m, 1H), 3.84 (s, 3H), 3.42 (dd,  $J = 16.5, 5.4$  Hz, 1H), 2.66 – 2.57 (m, 2H), 2.55 (d,  $J = 16.5$  Hz, 1H);  $^{13}\text{C}$  NMR (151 MHz,  $\text{CDCl}_3$ )  $\delta$  160.8, 151.6, 146.4, 130.8, 130.5, 127.6, 127.0, 126.2, 123.0, 119.7, 113.5, 113.0, 76.3, 76.0, 56.3, 43.6, 35.6; HRMS ( $\text{ESI}^+$ )  $m/z$ : calcd for  $[\text{M}+\text{H}]^+\text{C}_{17}\text{H}_{18}\text{NO}_2$ : 268.1333, found: 268.1358.

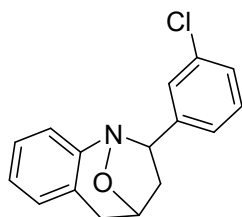

Compound **3r**: Yield 61%,  $^1\text{H}$  NMR (600 MHz,  $\text{CDCl}_3$ )  $\delta$  7.43 (d,  $J = 2.0$  Hz, 1H), 7.31 – 7.23 (m, 2H), 7.22 – 7.13 (m, 2H), 7.13 – 7.03 (m, 3H), 6.99 (dd,  $J = 7.3, 1.6$  Hz, 1H), 4.89 (td,  $J = 7.1, 6.4, 2.5$  Hz, 1H), 4.50 (dd,  $J = 8.1, 3.4$  Hz, 1H), 3.35 (dd,  $J = 16.6, 5.4$  Hz, 1H), 2.62 – 2.36 (m, 3H);  $^{13}\text{C}$  NMR (151 MHz,  $\text{CDCl}_3$ )  $\delta$  150.2, 145.7, 134.4, 129.8, 129.7, 127.1, 126.7, 126.7, 126.1, 125.2, 124.6, 121.9, 75.1, 74.7, 42.5, 34.6; HRMS ( $\text{ESI}^+$ )  $m/z$ : calcd for  $[\text{M}+\text{H}]^+\text{C}_{16}\text{H}_{15}\text{ClNO}$ : 272.0837, found: 272.0825.

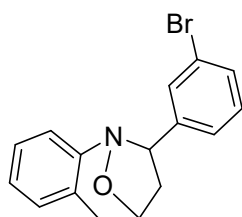

Compound **3s**: Yield 64%,  $^1\text{H}$  NMR (600 MHz,  $\text{CDCl}_3$ )  $\delta$  7.66 (t,  $J = 1.9$  Hz, 1H), 7.42 – 7.35 (m, 2H), 7.22 (t,  $J = 7.8$  Hz, 1H), 7.20 – 7.12 (m, 3H), 7.07 (dd,  $J = 7.2, 1.6$  Hz, 1H), 4.96 (ddd,  $J = 7.3, 5.4, 2.4$  Hz, 1H), 4.58 (dd,  $J = 8.1, 3.3$  Hz, 1H), 3.42 (dd,  $J = 16.6, 5.4$  Hz, 1H), 2.65 – 2.47 (m, 3H);  $^{13}\text{C}$  NMR (151 MHz,  $\text{CDCl}_3$ )  $\delta$  150.1, 146.0, 130.0, 129.8, 129.5, 126.7, 126.1, 125.1, 125.1, 122.6, 121.9, 75.1, 74.7, 42.5, 34.6; HRMS ( $\text{ESI}^+$ )  $m/z$ : calcd for  $[\text{M}+\text{H}]^+\text{C}_{16}\text{H}_{15}\text{BrNO}$ : 317.2053, found: 317.2073.

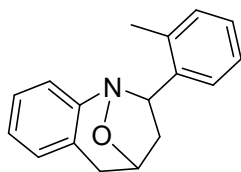

Compound **3t**: Yield 56%,  $^1\text{H}$  NMR (600 MHz,  $\text{CDCl}_3$ )  $\delta$  7.76 (dd,  $J = 7.8, 1.3$  Hz, 1H), 7.28 – 7.24 (m, 1H), 7.21 – 7.12 (m, 5H), 7.07 (dd,  $J = 6.8, 1.5$  Hz, 1H), 4.94 (ddd,  $J = 7.6, 5.4, 1.9$  Hz, 1H), 4.73 (dd,  $J = 8.7, 2.8$  Hz, 1H), 3.43 (dd,  $J = 16.6, 5.4$  Hz, 1H), 2.63 (ddd,  $J = 12.4, 8.6, 1.9$  Hz, 1H), 2.56 (d,  $J = 16.5$  Hz, 1H), 2.46 (dddd,  $J = 12.2, 7.8, 2.9, 1.3$  Hz, 1H), 2.26 (s, 3H);  $^{13}\text{C}$  NMR (151 MHz,  $\text{CDCl}_3$ )  $\delta$  150.8, 141.8, 134.0, 130.0, 129.8, 126.8, 126.6, 126.2, 125.9, 125.8, 125.3, 121.9, 75.0, 72.5, 42.1, 34.7, 19.7; HRMS (ESI<sup>+</sup>)  $m/z$ : calcd for  $[\text{M}+\text{H}]^+\text{C}_{17}\text{H}_{18}\text{NO}$ : 252.1383, found: 252.1394.

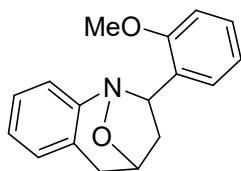

Compound **3u**: Yield 59%,  $^1\text{H}$  NMR (600 MHz,  $\text{CDCl}_3$ )  $\delta$  7.75 (ddd,  $J = 7.5, 1.8, 0.7$  Hz, 1H), 7.25 (td,  $J = 7.8, 1.7$  Hz, 1H), 7.19 – 7.11 (m, 3H), 7.07 (dt,  $J = 7.5, 1.1$  Hz, 1H), 7.01 (td,  $J = 7.5, 1.1$  Hz, 1H), 6.86 (dd,  $J = 8.2, 1.1$  Hz, 1H), 4.89 (td,  $J = 7.9, 7.2, 2.0$  Hz, 2H), 3.81 (s, 3H), 3.41 (dd,  $J = 16.5, 5.4$  Hz, 1H), 2.71 – 2.33 (m, 3H);  $^{13}\text{C}$  NMR (151 MHz,  $\text{CDCl}_3$ )  $\delta$  155.8, 150.8, 131.9, 129.7, 127.8, 126.7, 126.4, 125.7, 125.4, 122.0, 120.5, 109.9, 74.8, 70.0, 55.2, 42.1, 34.8; HRMS (ESI<sup>+</sup>)  $m/z$ : calcd for  $[\text{M}+\text{H}]^+\text{C}_{16}\text{H}_{14}\text{F}_2\text{NO}$ : 268.1332, found: 268.1354.

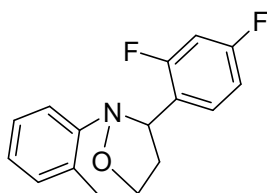

Compound **3v**: Yield 68%,  $^1\text{H}$  NMR (600 MHz,  $\text{CDCl}_3$ )  $\delta$  7.74 (td,  $J = 8.6, 6.5$  Hz, 1H), 7.23 – 7.11 (m, 3H), 7.06 (dd,  $J = 7.2, 1.7$  Hz, 1H), 6.90 (tdd,  $J = 8.5, 2.6, 1.1$  Hz, 1H), 6.78 (ddd,  $J = 10.3, 8.8, 2.5$  Hz, 1H), 4.94 (ddd,  $J = 7.5, 5.3, 1.8$  Hz, 1H), 4.83 (dt,  $J = 8.7, 1.9$  Hz, 1H), 3.50 – 3.34 (m, 1H), 2.63 (ddd,  $J = 12.8, 8.6, 1.9$  Hz, 1H), 2.56 (d,  $J = 16.6$  Hz, 1H), 2.50 (dddt,  $J = 12.9, 7.7, 2.7, 1.3$  Hz, 1H);  $^{13}\text{C}$  NMR (151 MHz,  $\text{CDCl}_3$ )  $\delta$  161.9 (dd,  $J = 247.6, 12.1$  Hz), 159.6 (dd,  $J = 247.6, 12.1$  Hz), 150.1, 129.8, 128.8 (dd,  $J = 9.1, 4.5$  Hz), 126.7 (dd,  $J = 13.6, 4.5$  Hz), 126.7, 126.2, 125.1, 122.0, 111.1 (dd,  $J = 21.1, 3.0$  Hz), 103.3 (dd,  $J = 25.7, 25.7$  Hz), 75.0, 68.5 (d,  $J = 1.5$  Hz), 41.9, 34.6; HRMS (ESI<sup>+</sup>)  $m/z$ : calcd for  $[\text{M}+\text{H}]^+\text{C}_{16}\text{H}_{14}\text{F}_2\text{NO}$ : 274.1038, found: 274.1045.

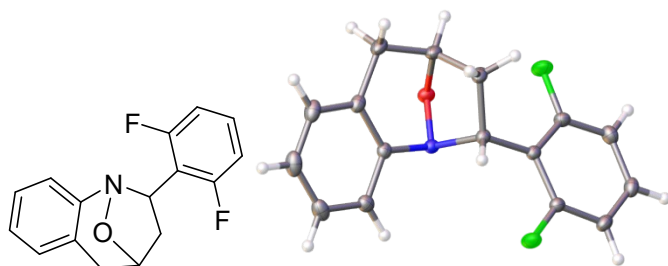

Compound **3w**: Yield 54%,  $^1\text{H NMR}$  (600 MHz,  $\text{CDCl}_3$ )  $\delta$  7.29 – 7.23 (m, 1H), 7.21 (ddd,  $J = 9.5, 5.8, 2.3$  Hz, 1H), 7.18 – 7.13 (m, 3H), 6.98 – 6.85 (m, 2H), 5.12 (ddd,  $J = 7.6, 5.1, 2.2$  Hz, 1H), 4.99 (dd,  $J = 8.9, 2.2$  Hz, 1H), 3.46 (dd,  $J = 16.4, 5.2$  Hz, 1H), 3.14 – 2.99 (m, 1H), 2.58 (d,  $J = 16.3$  Hz, 1H), 2.41 (ddq,  $J = 12.9, 8.9, 2.0$  Hz, 1H);  $^{13}\text{C NMR}$  (151 MHz,  $\text{CDCl}_3$ )  $\delta$  161.1 (dd,  $J = 249.9, 7.8$  Hz), 150.1, 129.8, 129.3 (t,  $J = 10.6$  Hz), 126.6, 126.1, 125.3, 122.0, 117.7 (t,  $J = 16.0$  Hz), 111.8, (dd,  $J = 22.5, 4.8$  Hz), 75.4, 66.3, 37.9 (d,  $J = 2.9$  Hz), 34.9; HRMS (ESI<sup>+</sup>)  $m/z$ : calcd for  $[\text{M}+\text{H}]^+\text{C}_{16}\text{H}_{14}\text{F}_2\text{NO}$ : 274.1038, found: 274.1047.

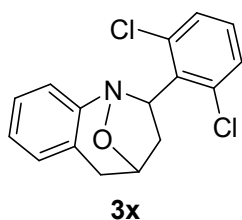

Compound **3x**: Yield <5%, HRMS (ESI<sup>+</sup>)  $m/z$ : calcd for  $[\text{M}+\text{H}]^+\text{C}_{16}\text{H}_{14}\text{Cl}_2\text{NO}$ : 306.0447, found: 306.0451.

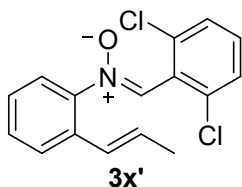

Compound **3x'**: Yield 60%,  $^1\text{H NMR}$  (600 MHz,  $\text{CDCl}_3$ )  $\delta$  7.71 (s, 1H), 7.67 – 7.56 (m, 1H), 7.50 (dd,  $J = 7.9, 1.3$  Hz, 1H), 7.45 – 7.37 (m, 3H), 7.36 – 7.28 (m, 2H), 6.83 (dq,  $J = 15.7, 1.8$  Hz, 1H), 6.36 (dq,  $J = 15.7, 6.6$  Hz, 1H), 1.91 (dd,  $J = 6.7, 1.8$  Hz, 3H);  $^{13}\text{C NMR}$  (151 MHz,  $\text{CDCl}_3$ )  $\delta$  144.9, 134.7, 133.0, 130.8, 130.1, 129.0, 128.8, 127.2, 126.8, 126.4, 125.3, 123.9, 123.0, 17.8; HRMS (ESI<sup>+</sup>)  $m/z$ : calcd for  $[\text{M}+\text{H}]^+\text{C}_{16}\text{H}_{14}\text{Cl}_2\text{NO}$ : 306.0447, found: 306.0453.

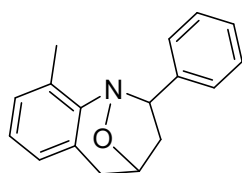

Compound **3y**: Yield 53%,  $^1\text{H NMR}$  (600 MHz,  $\text{CDCl}_3$ )  $\delta$  7.51 (dd,  $J = 7.9, 1.4$  Hz, 2H), 7.38 (t,  $J = 7.7$  Hz, 2H), 7.34 – 7.23 (m, 1H), 7.11 – 6.99 (m, 2H), 6.98 (dd,  $J = 7.0, 2.2$  Hz, 1H), 4.96 (ddd,  $J = 7.5, 5.3, 2.1$  Hz, 1H), 4.55 (dd,  $J = 8.4, 2.9$  Hz, 1H),



3.42 (dd,  $J = 16.5, 5.5$  Hz, 1H), 2.68 – 2.56 (m, 2H), 2.53 (d,  $J = 16.5$  Hz, 1H), 2.31 (s, 3H);  $^{13}\text{C}$  NMR (151 MHz,  $\text{CDCl}_3$ )  $\delta$  148.6, 143.6, 130.6, 128.5, 128.0, 127.3, 126.9, 126.4, 125.3, 124.8, 73.5, 42.6, 34.8, 17.0; HRMS (ESI<sup>+</sup>) $m/z$ : calcd for  $[\text{M}+\text{H}]^+\text{C}_{17}\text{H}_{18}\text{NO}$ : 252.1383, found: 252.1371.

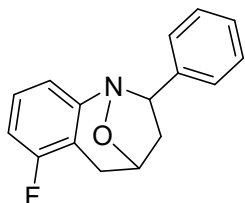

Compound **3z**: Yield 71%,  $^1\text{H}$  NMR (600 MHz,  $\text{CDCl}_3$ )  $\delta$  7.50 – 7.44 (m, 2H), 7.37 (t,  $J = 7.7$  Hz, 2H), 7.33 – 7.26 (m, 1H), 7.16 (td,  $J = 8.0, 6.0$  Hz, 1H), 6.96 – 6.86 (m, 2H), 5.00 (ddd,  $J = 7.5, 5.3, 1.9$  Hz, 1H), 4.63 (dd,  $J = 8.6, 2.8$  Hz, 1H), 3.30 (dd,  $J = 17.0, 5.5$  Hz, 1H), 2.75 – 2.46 (m, 3H);  $^{13}\text{C}$  NMR (151 MHz,  $\text{CDCl}_3$ )  $\delta$  161.3 (d,  $J = 246.7$  Hz), 152.0 (d,  $J = 6.0$  Hz), 143.3, 128.5, 127.4 (d,  $J = 9.4$  Hz), 127.1, 126.3, 117.5 (d,  $J = 3.2$  Hz), 113.2 (d,  $J = 20.2$  Hz), 112.4 (d,  $J = 21.4$  Hz), 75.3, 74.1, 42.7, 29.3 (d,  $J = 2.3$  Hz); HRMS (ESI<sup>+</sup>) $m/z$ : calcd for  $[\text{M}+\text{H}]^+\text{C}_{16}\text{H}_{14}\text{FNO}$ : 256.1132, found: 256.1148.

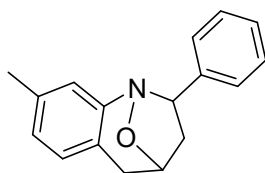

Compound **3aa**: Yield 56%,  $^1\text{H}$  NMR (600 MHz,  $\text{CDCl}_3$ )  $\delta$  7.50 – 7.45 (m, 2H), 7.36 (t,  $J = 7.7$  Hz, 2H), 7.29 – 7.26 (m, 1H), 7.02 (d,  $J = 7.7$  Hz, 1H), 6.96 (dd,  $J = 7.7, 1.7$  Hz, 1H), 6.91 (d,  $J = 1.8$  Hz, 1H), 4.96 (ddd,  $J = 8.4, 4.9, 2.7$  Hz, 1H), 4.71 – 4.54 (m, 1H), 3.38 (dd,  $J = 16.4, 5.4$  Hz, 1H), 2.67 – 2.55 (m, 2H), 2.51 (d,  $J = 16.4$  Hz, 1H), 2.31 (s, 3H);  $^{13}\text{C}$  NMR (151 MHz,  $\text{CDCl}_3$ )  $\delta$  150.3, 143.8, 136.4, 129.5, 128.4, 126.9, 126.7, 126.4, 122.4, 121.9, 75.4, 75.1, 42.5, 34.3, 21.0; HRMS (ESI<sup>+</sup>) $m/z$ : calcd for  $[\text{M}+\text{H}]^+\text{C}_{17}\text{H}_{18}\text{NO}$ : 252.1383, found: 252.1401.

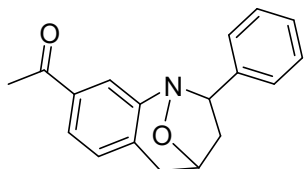

Compound **3ab**: Yield 68%,  $^1\text{H}$  NMR (600 MHz,  $\text{CDCl}_3$ )  $\delta$  7.76 (dd,  $J = 7.9, 1.8$  Hz, 1H), 7.66 (d,  $J = 1.8$  Hz, 1H), 7.53 – 7.43 (m, 2H), 7.40 – 7.36 (m, 2H), 7.30 – 7.27 (m, 1H), 7.24 (d,  $J = 7.8$  Hz, 1H), 4.99 (ddd,  $J = 7.6, 5.3, 1.9$  Hz, 1H), 4.65 (dd,  $J = 8.6, 2.8$  Hz, 1H), 3.45 (ddt,  $J = 17.2, 5.4, 1.2$  Hz, 1H), 2.69 – 2.59 (m, 3H), 2.57 (s, 3H);  $^{13}\text{C}$  NMR (151 MHz,  $\text{CDCl}_3$ )  $\delta$  197.4, 150.7, 143.2, 135.8, 131.4, 130.1, 128.5,

127.1, 126.3, 125.6, 122.2, 75.2, 74.7, 42.7, 34.9, 26.6; HRMS (ESI<sup>+</sup>) m/z: calcd for [M+Na]<sup>+</sup>C<sub>18</sub>H<sub>17</sub>NO<sub>2</sub>Na: 302.1152, found: 302.1163.

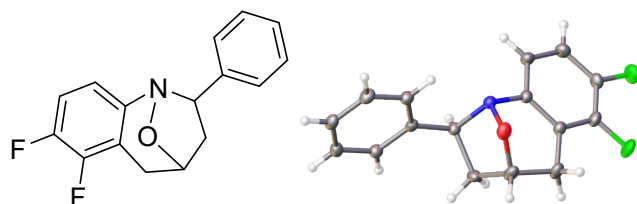

Compound **3ac**: Yield 52%, <sup>1</sup>H NMR (600 MHz, CDCl<sub>3</sub>) δ 7.45 (d, *J* = 7.3 Hz, 2H), 7.37 (t, *J* = 7.7 Hz, 2H), 7.31 – 7.25 (m, 1H), 6.99 (q, *J* = 8.8 Hz, 1H), 6.86 (ddd, *J* = 8.7, 4.2, 1.7 Hz, 1H), 4.99 (t, *J* = 6.2 Hz, 1H), 4.58 (dd, *J* = 8.6, 2.7 Hz, 1H), 3.32 (dd, *J* = 17.2, 5.4 Hz, 1H), 2.71 – 2.48 (m, 3H); <sup>13</sup>C NMR (151 MHz, CDCl<sub>3</sub>) δ 148.9 (dd, *J* = 247.6, 13.6 Hz), 148.2 (dd, *J* = 246.1, 13.6 Hz), 146.7 (dd, *J* = 3.0, 3.0 Hz), 143.1, 128.5, 127.2, 126.3, 117.4 (dd, *J* = 3.0, 3.0 Hz), 115.5 (d, *J* = 16.6 Hz), 114.6 (d, *J* = 18.1 Hz), 75.3, 73.5, 42.7, 29.4; HRMS (ESI<sup>+</sup>) m/z: calcd for [M+H]<sup>+</sup>C<sub>16</sub>H<sub>14</sub>F<sub>2</sub>NO: 274.1038, found: 274.1023.

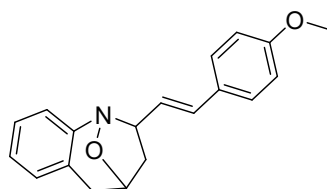

Compound **3ad**: Yield 41%, <sup>1</sup>H NMR (600 MHz, Chloroform-*d*) δ 7.35 (t, *J* = 9.7 Hz, 2H), 7.21 – 7.04 (m, 4H), 6.85 (d, *J* = 8.4 Hz, 2H), 6.49 (d, *J* = 15.9 Hz, 1H), 6.24 (dd, *J* = 15.9, 7.6 Hz, 1H), 4.92 (s, 1H), 4.26 – 4.13 (m, 1H), 3.81 (s, 3H), 3.39 (dd, *J* = 16.5, 5.2 Hz, 1H), 2.50 (d, *J* = 16.5 Hz, 1H), 2.38 (tt, *J* = 12.5, 6.4 Hz, 2H); <sup>13</sup>C NMR (151 MHz, CDCl<sub>3</sub>) δ 159.1, 150.0, 129.8, 129.5, 129.3, 129.2, 127.6, 126.5, 125.9, 125.1, 121.9, 113.9, 74.8, 74.7, 55.2, 40.7, 34.7; HRMS (ESI<sup>+</sup>) m/z: calcd for [M+H]<sup>+</sup>C<sub>19</sub>H<sub>20</sub>NO<sub>2</sub>: 294.1489, found: 294.1502.

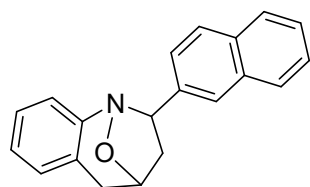

Compound **3ae**: Yield 46%, <sup>1</sup>H NMR (600 MHz, CDCl<sub>3</sub>) δ 7.96 (s, 1H), 7.89 – 7.74 (m, 3H), 7.57 (dt, *J* = 8.5, 1.5 Hz, 1H), 7.47 (dq, *J* = 8.6, 7.0 Hz, 2H), 7.25 – 7.04 (m, 4H), 5.02 (td, *J* = 6.5, 2.4 Hz, 1H), 4.80 (dd, *J* = 8.0, 3.5 Hz, 1H), 3.46 (dd, *J* = 16.5, 5.5 Hz, 1H), 2.79 – 2.64 (m, 2H), 2.59 (d, *J* = 16.5 Hz, 1H); <sup>13</sup>C NMR (151 MHz, CDCl<sub>3</sub>) δ 150.6, 141.0, 133.3, 132.5, 129.8, 128.3, 128.0, 127.5, 126.6, 126.0, 126.0, 125.7, 125.3, 124.8, 124.8, 122.0, 75.5, 75.2, 42.6, 34.7; HRMS (ESI<sup>+</sup>) m/z: calcd for [M+H]<sup>+</sup>C<sub>20</sub>H<sub>18</sub>NO: 288.1383, found: 288.1372.

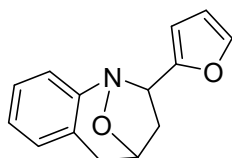

Compound **3af**: Yield 37%,  $^1\text{H}$  NMR (600 MHz,  $\text{CDCl}_3$ )  $\delta$  7.40 (dd,  $J = 1.8, 0.9$  Hz, 1H), 7.22 – 7.09 (m, 4H), 6.38 – 6.30 (m, 2H), 4.99 (ddd,  $J = 7.5, 5.3, 1.9$  Hz, 1H), 4.64 (dd,  $J = 8.7, 2.6$  Hz, 1H), 3.46 – 3.37 (m, 1H), 2.78 (dddd,  $J = 12.8, 7.8, 2.7, 1.2$  Hz, 1H), 2.54 (d,  $J = 16.5$  Hz, 1H), 2.42 (ddd,  $J = 12.7, 8.7, 2.0$  Hz, 1H);  $^{13}\text{C}$  NMR (151 MHz,  $\text{CDCl}_3$ )  $\delta$  155.2, 149.9, 142.0, 129.8, 126.7, 126.2, 125.1, 122.1, 110.3, 106.4, 74.8, 69.5, 38.6, 34.6; HRMS (ESI $^+$ )  $m/z$ : calcd for  $[\text{M}+\text{H}]^+$   $\text{C}_{14}\text{H}_{14}\text{NO}_2$ : 228.1019, found: 228.1025.

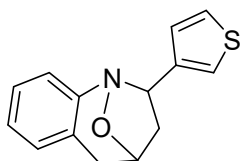

Compound **3ag**: Yield 32%,  $^1\text{H}$  NMR (600 MHz,  $\text{CDCl}_3$ )  $\delta$  7.33 – 7.26 (m, 2H), 7.21 – 7.07 (m, 5H), 4.97 (ddd,  $J = 7.5, 5.2, 2.0$  Hz, 1H), 4.67 (dd,  $J = 8.5, 2.5$  Hz, 1H), 3.55 – 3.33 (m, 1H), 2.61 (dddd,  $J = 12.6, 7.8, 2.5, 1.2$  Hz, 1H), 2.57 – 2.46 (m, 2H);  $^{13}\text{C}$  NMR (151 MHz,  $\text{CDCl}_3$ )  $\delta$  150.2, 144.8, 129.8, 126.6, 126.6, 126.0, 126.0, 125.1, 122.0, 120.9, 74.9, 71.9, 41.7, 34.7; HRMS (ESI $^+$ )  $m/z$ : calcd for  $[\text{M}+\text{H}]^+$   $\text{C}_{14}\text{H}_{14}\text{NOS}$ : 244.0791, found: 244.0801.

## Experimental procedure for the synthesis of double molecular allylation product

### 5a

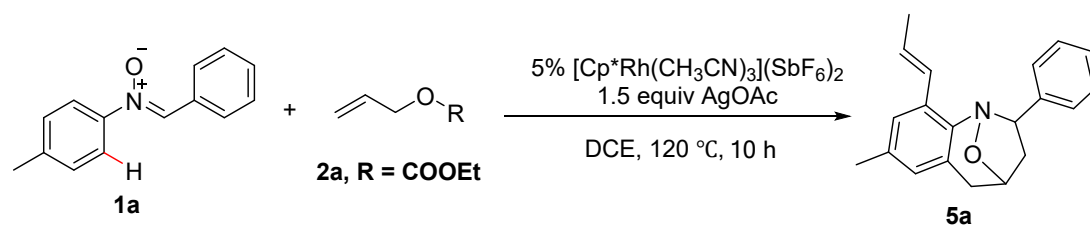

$[\text{Cp}^*\text{Rh}(\text{CH}_3\text{CN})_3](\text{SbF}_6)_2$  (8 mg, 0.01 mmol, 5% equiv), AgOAc (50 mg, 0.3 mmol, 1.5 equiv), nitronium **1a** (63 mg, 0.2 mmol, 1.0 equiv), the allyl precursor **2a** (53 mg, 0.4 mmol, 2.0 equiv) and DCE (2 mL) were added to a test tube. The reaction mixture was stirred at 120 °C for 10 h. After cooling to room temperature, the reaction mixture was filtered through a pad of celite washing with  $\text{CH}_2\text{Cl}_2$ . The solvents were removed under reduced pressure and the crude reaction mixture was purified by column chromatography on silica gel using PE/EA (30:1) as eluents to afford double allylation product **5a**.

Compound **5a**: Yield 20%,  $^1\text{H}$  NMR (600 MHz,  $\text{CDCl}_3$ )  $\delta$  7.47 (dd,  $J = 7.9, 1.4$  Hz, 2H), 7.37 (t,  $J = 7.7$  Hz, 2H), 7.33 – 7.25 (m, 1H), 7.19 – 7.08 (m, 1H), 6.93 – 6.77 (m, 2H), 6.17 (dq,  $J = 15.8, 6.6$  Hz, 1H), 4.96 (ddd,  $J = 7.5, 5.2, 1.9$  Hz, 1H), 4.50 (dd,  $J = 8.7, 2.5$  Hz, 1H), 3.39 (dd,  $J = 16.4, 5.4$  Hz, 1H), 2.64 (dddd,  $J = 12.7, 7.8, 2.7, 1.2$  Hz, 1H), 2.54 (ddd,  $J = 12.7, 8.6, 2.0$  Hz, 1H), 2.48 (d,  $J = 16.4$  Hz, 1H), 2.30 (s, 3H), 1.82 (dd,  $J = 6.6, 1.7$  Hz, 3H);  $^{13}\text{C}$  NMR (151 MHz,  $\text{CDCl}_3$ )  $\delta$  144.6, 143.5, 134.8, 130.7, 128.8, 128.4, 126.9, 126.8, 126.7, 126.1, 124.7, 123.7, 75.2, 74.2, 42.0, 34.9, 21.1, 18.8; HRMS (ESI<sup>+</sup>)  $m/z$ : calcd for  $[\text{M}+\text{Na}]^+$ : 314.1515, found: 314.1527

### Experimental procedure for N-O cleavage of **3a**

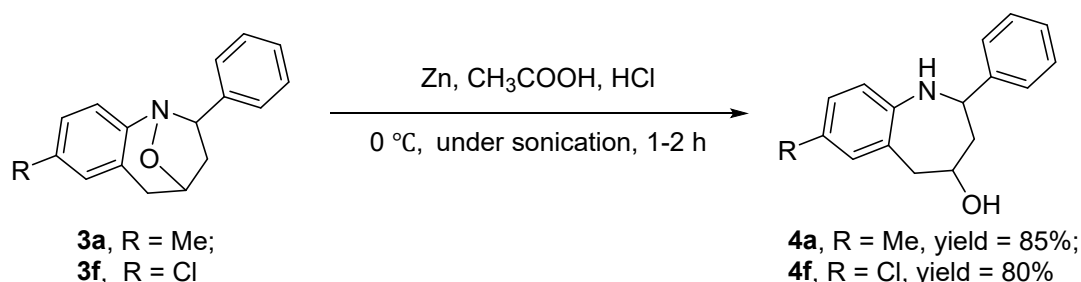

To a stirred and cooled (ice-bath) solutions of 1,4-epoxy-cycloadducts **3a/3f** (0.1 mmol, 1.0 equiv) in MeOH (1 mL), were added glacial acetic acid (90  $\mu\text{L}$ , 1.5 mmol, 15 equiv), zinc powder (131 mg, 2 mmol, 20 equiv), and hydrochloric acid (37% HCl, 125  $\mu\text{L}$ , 1.5 mmol, 15 equiv). The resulting reaction mixtures were then stirred at 0  $^\circ\text{C}$  under sonication for additional 1-2 h until the starting material was completely consumed (TLC control: for **3a**, 1 h; for **3f**, 2 h). Afterwards, the reaction mixture was filtered and the filtrate was neutralized with a 25% ammonium hydroxide solution to pH = 8, and then extracted with ethyl acetate. The combined organic extracts were dried over  $\text{Na}_2\text{SO}_4$ , filtered, and then concentrated under reduced pressure. The remaining crude material was purified by column chromatography on silica gel using PE/EA (4:1) as eluent to afford the desired compound **4a/4f** in a yield of 85%/80%.

Compound **4a**: Yield 85%,  $^1\text{H}$  NMR (600 MHz,  $\text{CDCl}_3$ )  $\delta$  7.44 – 7.41 (m, 2H), 7.39 (t,  $J = 7.6$  Hz, 2H), 7.36 – 7.30 (m, 1H), 7.00 (d,  $J = 2.0$  Hz, 1H), 6.89 (dd,  $J = 7.9, 2.0$  Hz, 1H), 6.61 (d,  $J = 7.8$  Hz, 1H), 3.93 (dd,  $J = 11.4, 2.1$  Hz, 1H), 3.87 (tdd,  $J = 10.1, 3.8, 2.2$  Hz, 1H), 3.11 (dd,  $J = 13.5, 10.4$  Hz, 1H), 2.97 (dt,  $J = 13.6, 2.3$  Hz, 1H), 2.28 (s, 3H), 2.20 (ddt,  $J = 12.9, 4.2, 2.2$  Hz, 1H), 2.12 (ddd,  $J = 12.7, 11.3, 9.9$  Hz, 1H);  $^{13}\text{C}$  NMR (151 MHz,  $\text{CDCl}_3$ )  $\delta$  146.8, 144.8, 132.2, 131.1, 128.9, 127.9, 127.9, 127.8, 126.4, 120.1, 61.4, 48.6, 44.5, 20.5; HRMS (ESI<sup>+</sup>)  $m/z$ : calcd for  $[\text{M}+\text{H}]^+$ : 254.1539, found: 254.1549.

Compound **4f**: Yield 80%,  $^1\text{H}$  NMR (600 MHz,  $\text{CDCl}_3$ )  $\delta$  7.43 – 7.36 (m, 4H), 7.34 (ddt,  $J = 6.8, 5.4, 2.4$  Hz, 1H), 7.14 (d,  $J = 2.5$  Hz, 1H), 7.05 – 7.00 (m, 1H), 6.61 (d,  $J = 8.3$  Hz, 1H), 3.91 (dd,  $J = 11.5, 2.1$  Hz, 1H), 3.84 (tdd,  $J = 10.1, 4.0, 2.4$  Hz, 1H), 3.06 (dd,  $J = 13.6, 10.2$  Hz, 1H), 2.95 (dt,  $J = 13.7, 2.3$  Hz, 1H), 2.22 – 2.15 (m, 1H), 2.15 – 2.06 (m, 1H);  $^{13}\text{C}$  NMR (151 MHz,  $\text{CDCl}_3$ )  $\delta$  147.7, 144.3, 131.1, 129.7, 128.9, 127.9, 127.1, 126.3, 126.2, 121.3, 69.5, 61.1, 48.1, 44.1; HRMS (ESI $^+$ )  $m/z$ : calcd for  $[\text{M}+\text{H}]^+$ : 274.0993, found: 274.0996.

### Preliminary mechanistic studies

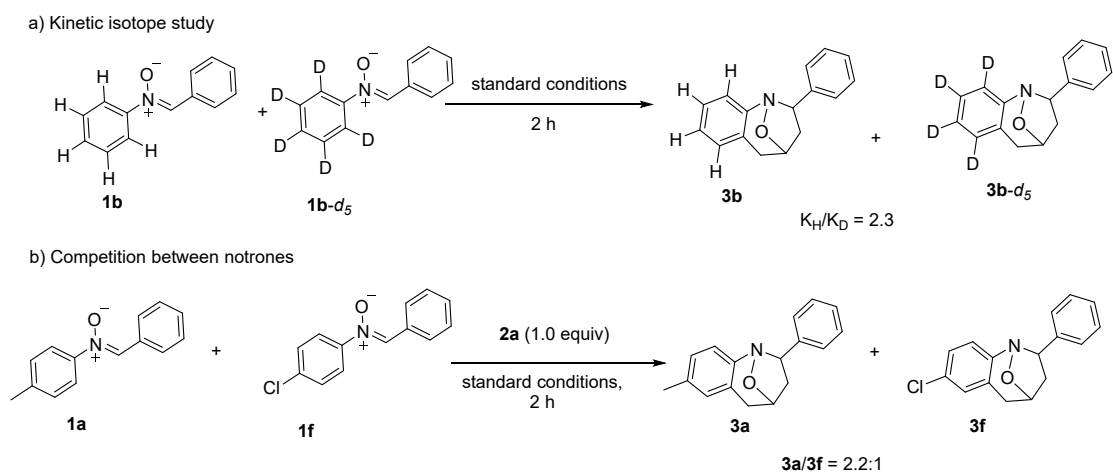

Scheme S1. Experiments for mechanistic studies.

### Kinetic Isotope Effect Experiments: intermolecular competitive reactions

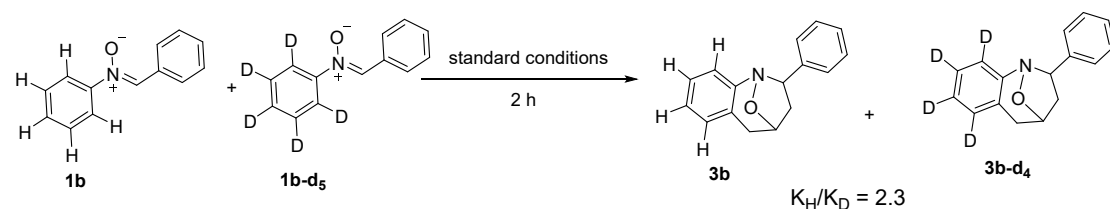

A mixture of nitron **1b** (0.3 mmol), nitron **1b-d<sub>5</sub>** (0.3 mmol),  $[\text{Cp}^*\text{Rh}(\text{CH}_3\text{CN})_3](\text{SbF}_6)_2$  (0.01 mmol), and  $\text{AgOAc}$  (0.3 mmol) were dissolved in chlorobenzene (2 mL) in a pressure tube and stirred for seconds, to which was added the allyl precursor **2a** (0.2 mmol). The reaction mixture was stirred at 120 °C for 2 h. After that, the reaction mixture was filtered through a pad of celite, and washed with  $\text{CH}_2\text{Cl}_2$  (10 mL x 3). Organic solvents were removed under reduced pressure and the residue was purified by silica gel chromatography using PE/EA (20:1) to afford the mixture of **3b/3b-d<sub>4</sub>** (10 mg, yield: ca. 21%). A KIE value of 2.3 was obtained on the

basis of  $^1\text{H}$  NMR analysis. This result suggests that the *ortho* C(sp<sup>2</sup>)-H bond cleavage might be related to the rate-limiting step.

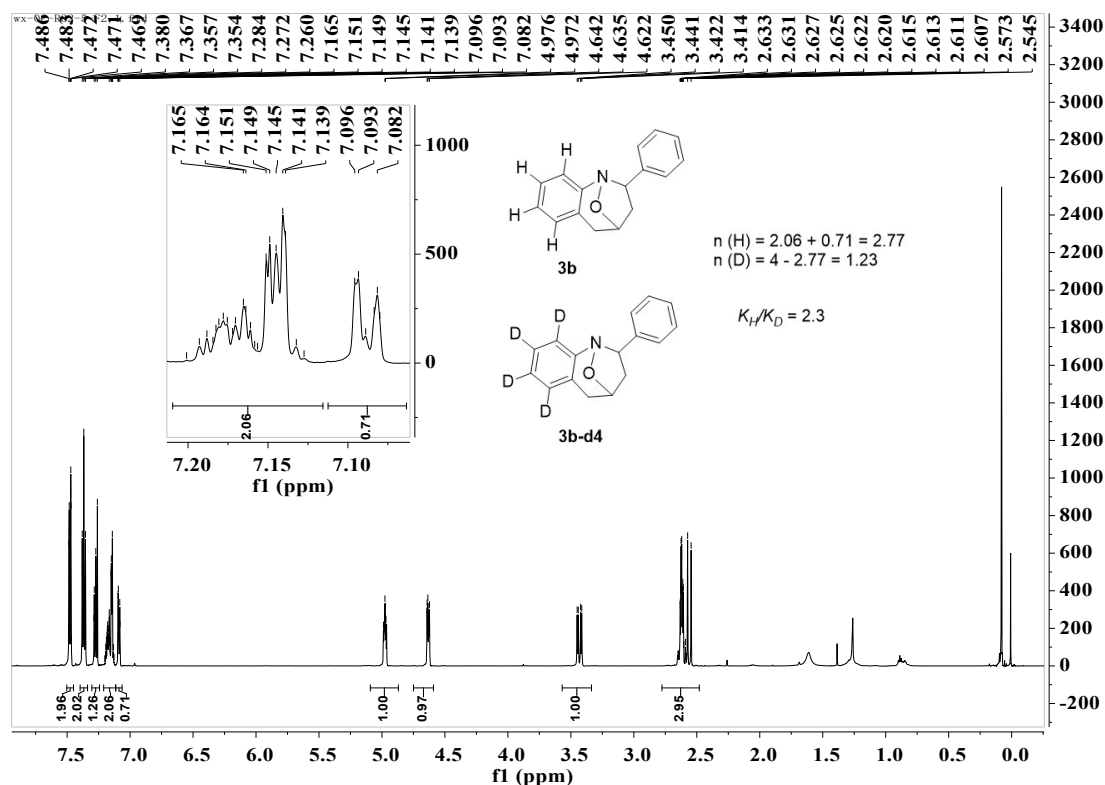

### Competition between nitrones

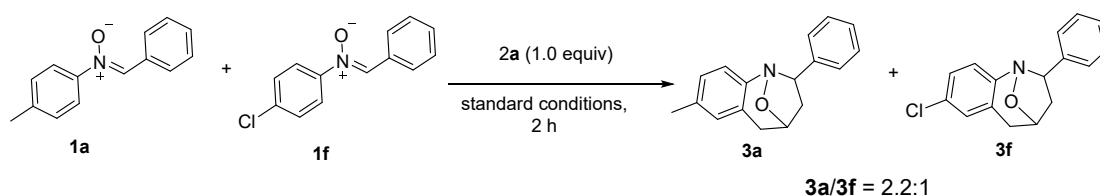

A mixture of nitronium **1a** (0.2 mmol), nitronium **1f** (0.2 mmol),  $[\text{Cp}^*\text{Rh}(\text{CH}_3\text{CN})_3](\text{SbF}_6)_2$  (0.01 mmol), and  $\text{AgOAc}$  (0.3 mmol) were dissolved in chlorobenzene (2 mL) in a pressure tube and stirred for seconds, to which was added the allyl precursor **2a** (0.2 mmol). The reaction mixture was stirred at 120 °C for 2 h. After that, the reaction mixture was filtered through a pad of celite, and washed with  $\text{CH}_2\text{Cl}_2$  (10 mL x 3). Organic solvents were removed under reduced pressure and the residue was purified by silica gel chromatography using PE/EA (20:1) to afford the mixture of **3a**/**3f** (11 mg, yield: 20-22%). The ratio of **3a**:**3f** = 2.2:1 was determined on the basis of  $^1\text{H}$  NMR analysis, which indicated that the reaction favored the electron-rich arene, implying that arene activation occurs likely by a variant of the classical electrophilic aromatic substitution mechanism (SEAr), namely electrophilic

metalation.

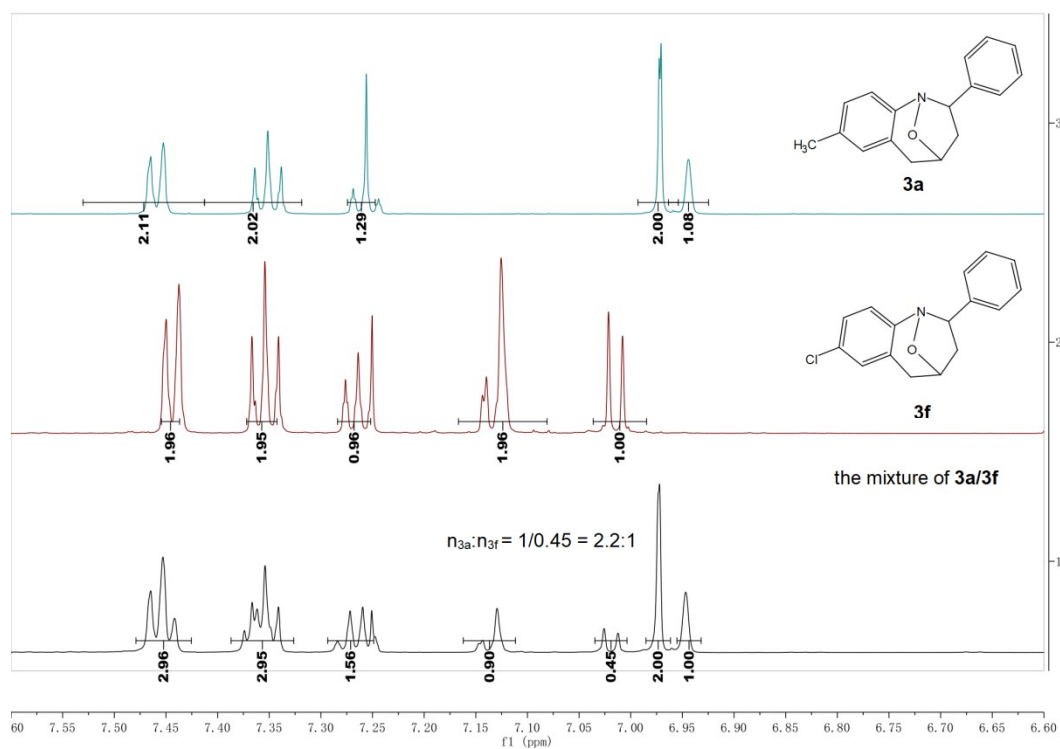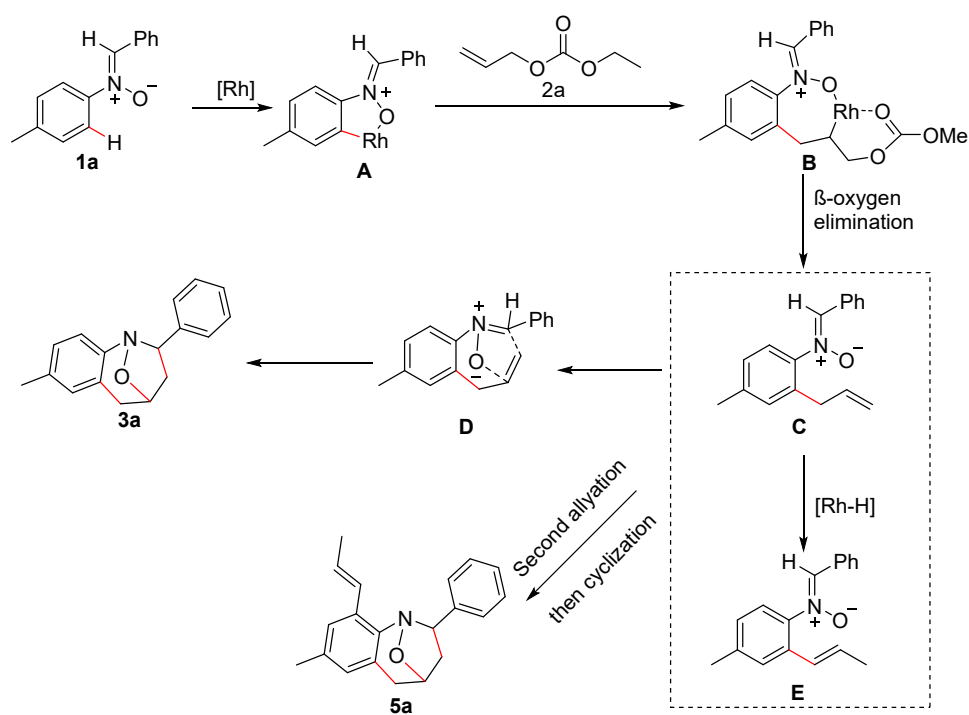

Scheme S2 Plausible catalytic mechanism

## References

- [1] Fujita, K.-i.; Takahashi, Y.; Owaki, M.; Yamamoto, K. and Yamaguchi, R., Synthesis of Five-, Six-, and Seven-Membered Ring Lactams by Cp\*Rh Complex-Catalyzed Oxidative N-Heterocyclization of Amino Alcohols. *Org. Lett.* **2004**, *6*, 2785-2788.
- [2] Li, Y.; Li, B.-J.; Wang, W.-H.; Huang, W.-P.; Zhang, X.-S.; Chen, K. and Shi, Z.-J., Rhodium-Catalyzed Direct Addition of Aryl C-H Bonds to N-Sulfonyl Aldimines. *Angew. Chem. Int. Ed.* **2011**, *50*, 2115-2119.
- [3] Duguet, N.; Slawin, A. M. Z. and Smith, A. D., An Asymmetric Hetero-Claisen Approach to 3-Alkyl-3-aryloxindoles. *Org. Lett.* **2009**, *11*, 3858-3861.
- [4] Liu, T.; Liu, Z.; Liu, Z.; Hu, D. and Wang, Y., Coupling of N-Nosylhydrazones with Nitrosoarenes: Transition-Metal-Free Approach to (Z)-N-Arylnitrones. *Synthesis* **2018**, *50*, 1728-1736.
- [5] a) Choi, M.; Viji, M.; Kim, D.; Lee, Y. H.; Sim, J.; Kwak, Y.-S.; Lee, K.; Lee, H. and Jung, J.-K., Metal-free approach for the L-proline mediated synthesis of nitrones from nitrosobenzene. *Tetrahedron* **2018**, *74*, 4182-4187; b) Tian, Z.; Xu, J.; Liu, B.; Tan, Q. and Xu, B., Copper-Catalyzed Synthesis of Polysubstituted Pyrroles through [3+1+1] Cycloaddition Reaction of Nitrones and Isocyanides. *Org. Lett.* **2018**, *20*, 2603-2606.
- [6] Riesco-Domínguez, A.; van de Wiel, J.; Hamlin, T. A.; van Beek, B.; Lindell, S. D.; Blanco-Ania, D.; Bickelhaupt, F. M. and Rutjes, F. P. J. T., Trifluoromethyl Vinyl Sulfide: A Building Block for the Synthesis of CF<sub>3</sub>S-Containing Isoxazolidines. *J. Org. Chem.* **2018**, *83*, 1779-1789.
- [7] Poulsen, P. H.; Vergura, S.; Monleón, A.; Jørgensen, D. K. B. and Jørgensen, K. A., Controlling Asymmetric Remote and Cascade 1,3-Dipolar Cycloaddition Reactions by Organocatalysis. *J. Am. Chem. Soc.* **2016**, *138*, 6412-6415.
- [8] Maiuolo, L.; De Nino, A.; Merino, P.; Russo, B.; Stabile, G.; Nardi, M.; D'Agostino, N. and Bernardi, T., Rapid, efficient and solvent free microwave mediated synthesis of aldo- and ketonitrones. *Arabian Journal of Chemistry* **2016**, *9*, 25-31.



# $^1\text{H}$ NMR and $^{13}\text{C}$ NMR Spectra

$^1\text{H}$  NMR (600 MHz,  $\text{CDCl}_3$ ) of compound **1a**

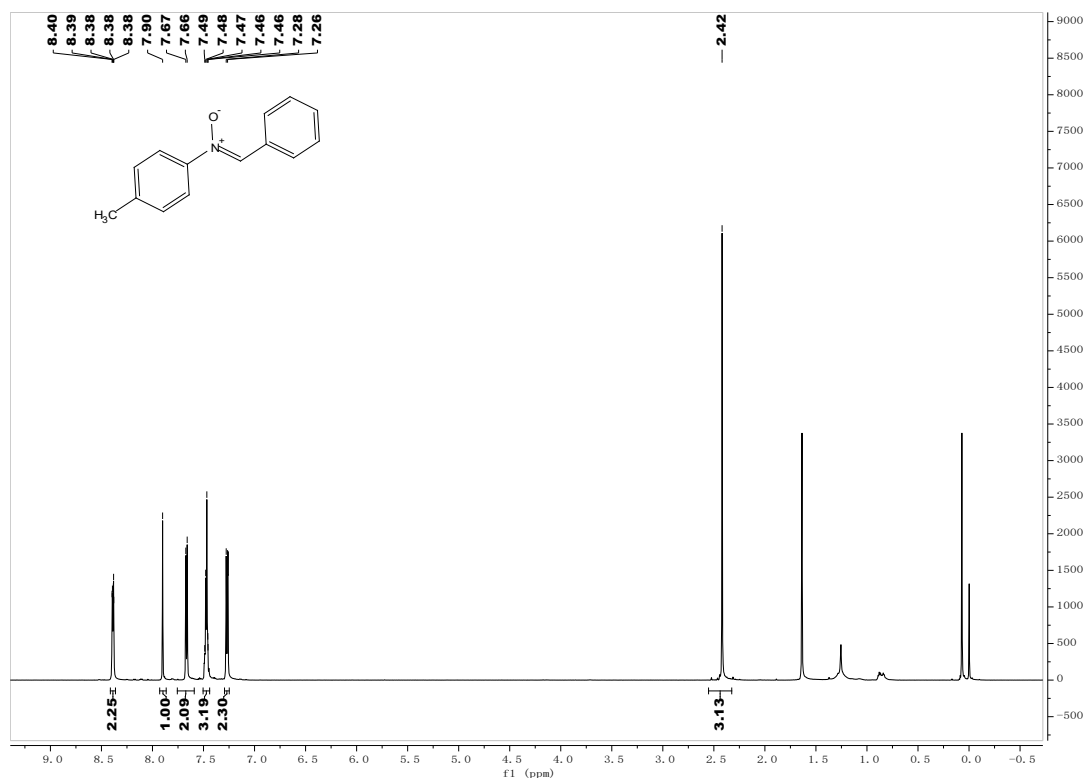

$^{13}\text{C}$  NMR (151 MHz,  $\text{CDCl}_3$ ) of compound **1a**

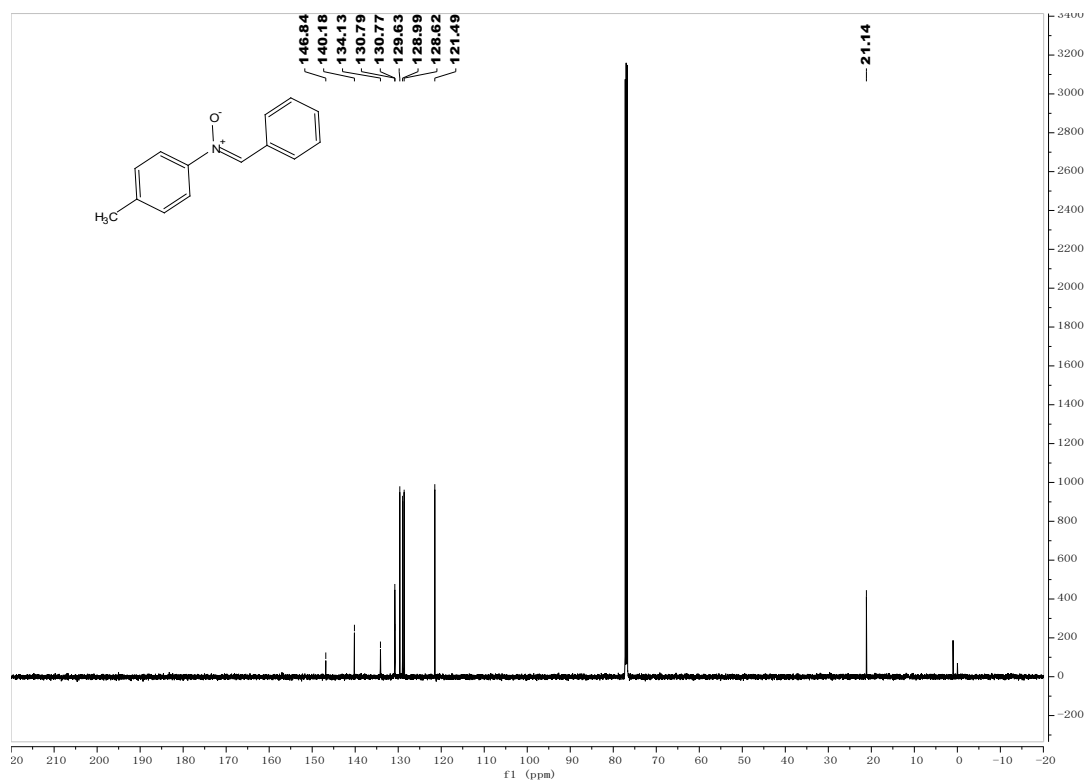

<sup>1</sup>H NMR (600 MHz, CDCl<sub>3</sub>) of compound **1b**

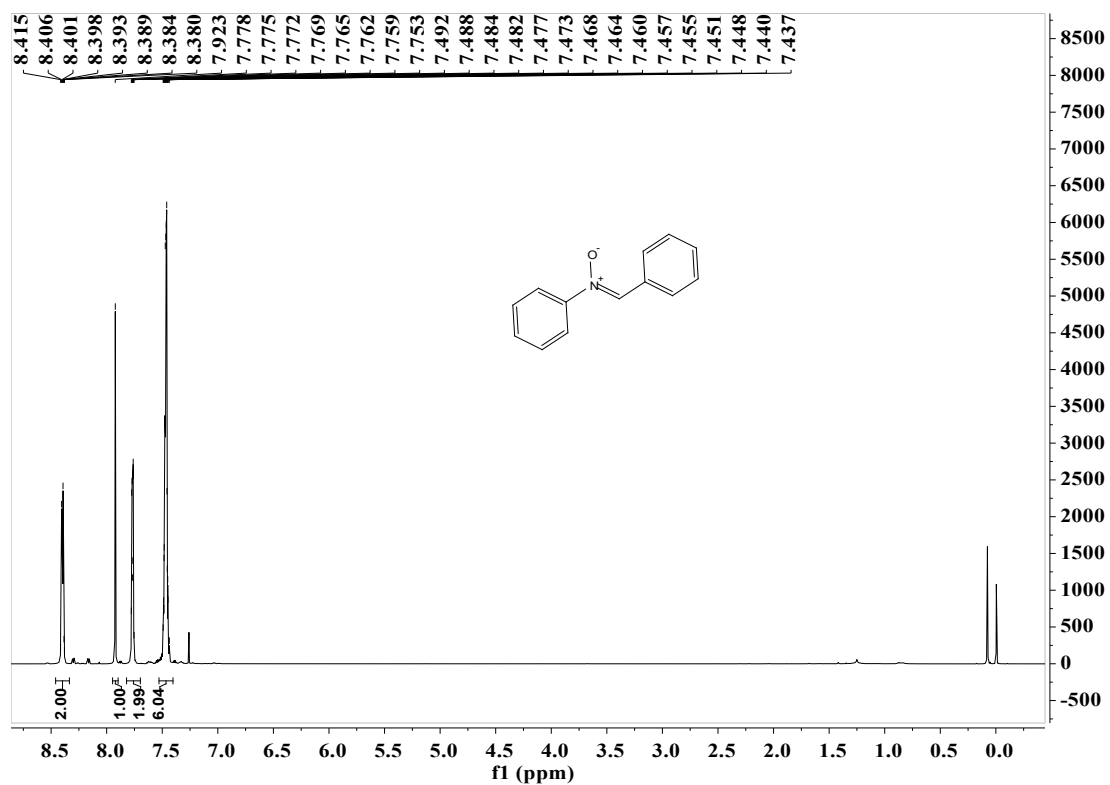

<sup>13</sup>C NMR (151 MHz, CDCl<sub>3</sub>) of compound **1b**

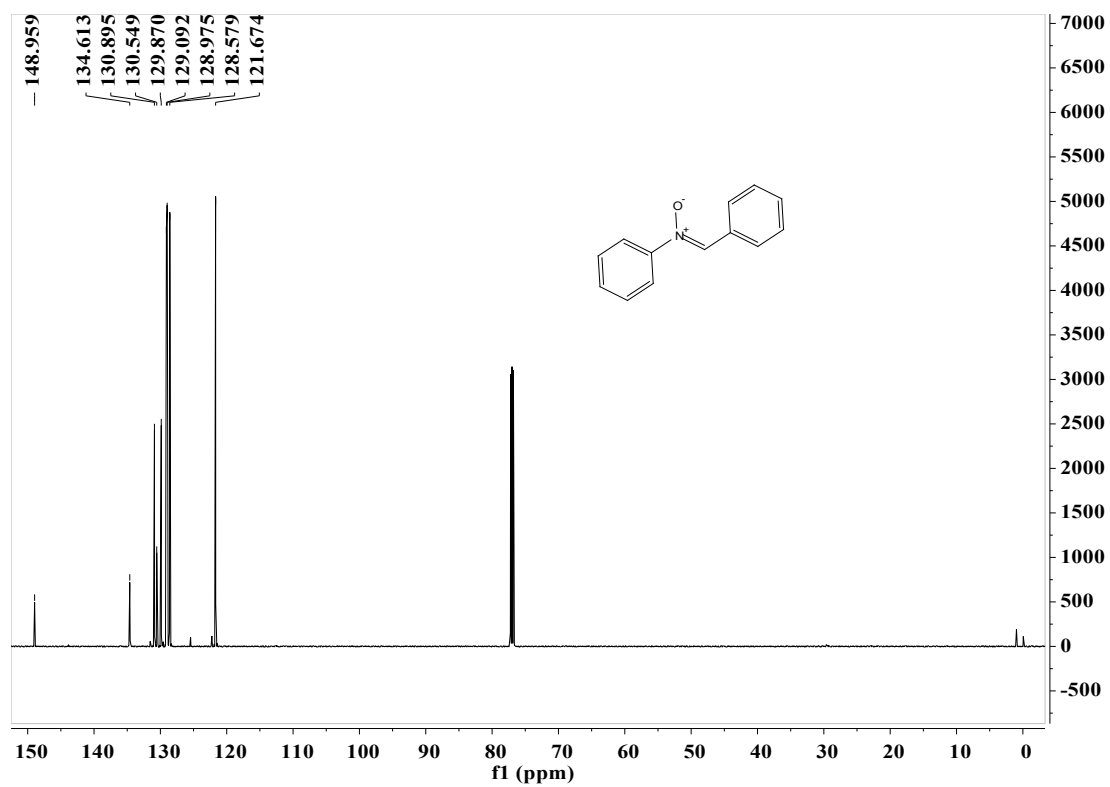

<sup>1</sup>H NMR (600 MHz, CDCl<sub>3</sub>) of compound **1c**

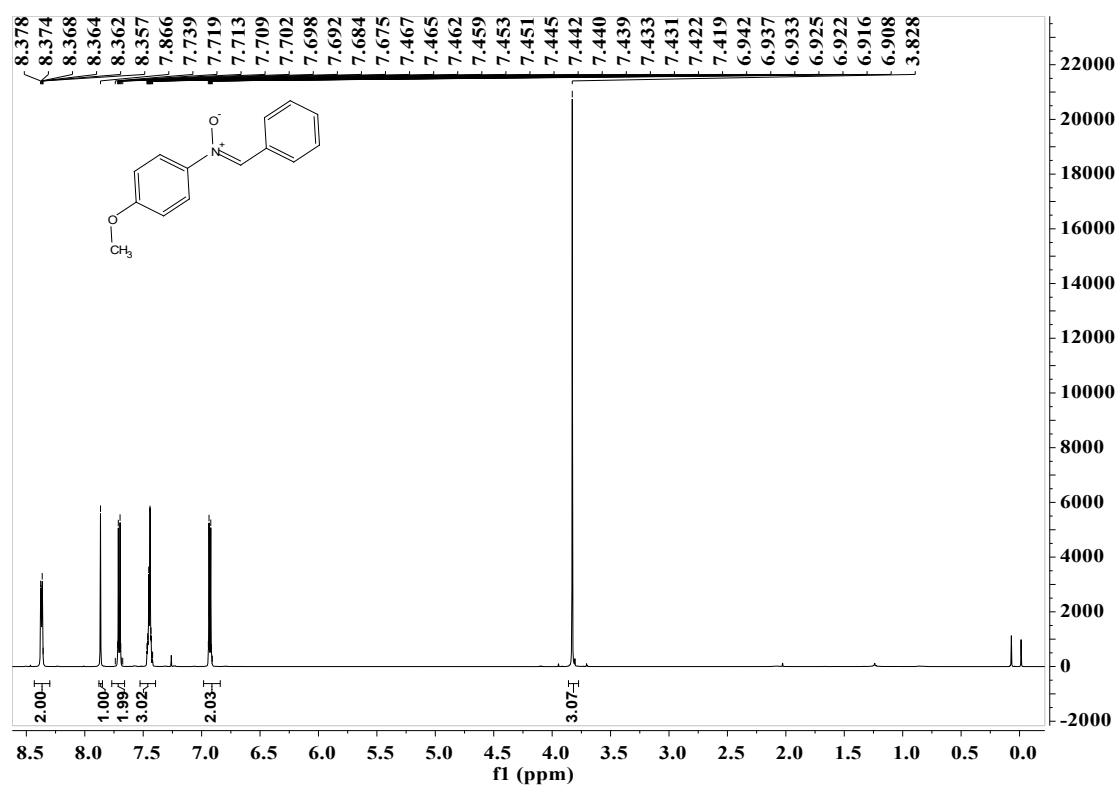

<sup>13</sup>C NMR (151 MHz, CDCl<sub>3</sub>) of compound **1c**

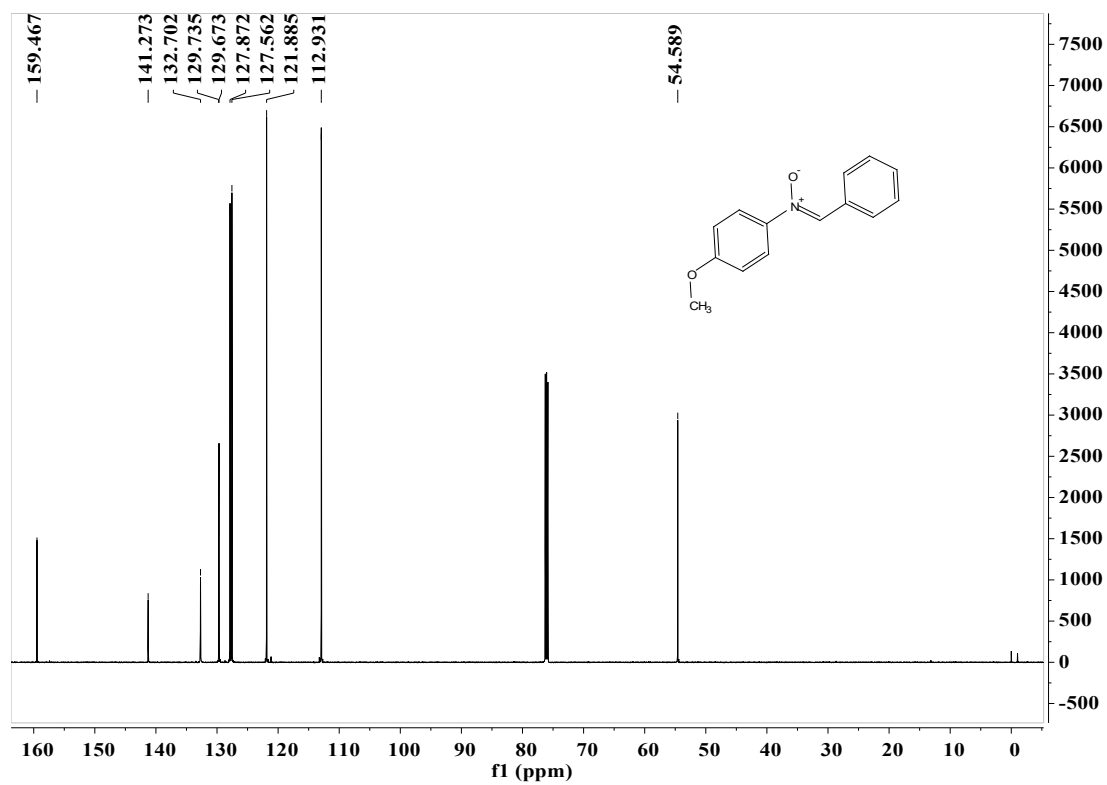

$^1\text{H}$  NMR (600 MHz,  $\text{CDCl}_3$ ) of compound **1d**

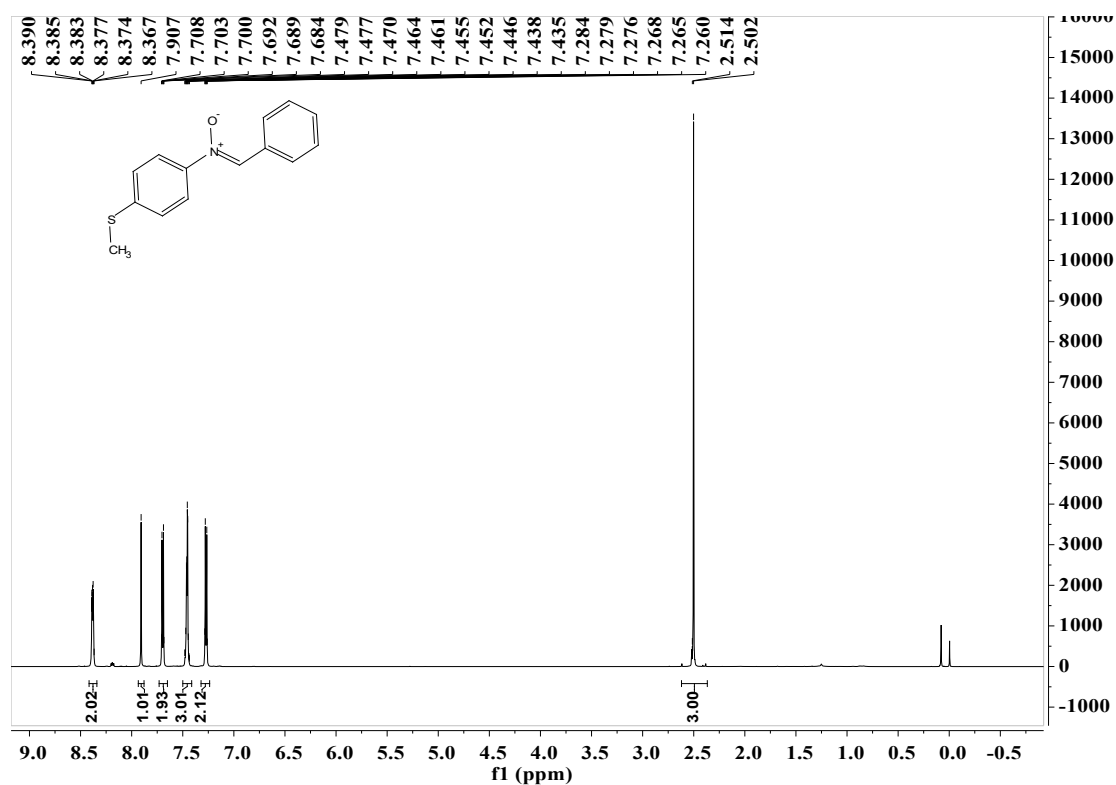

$^{13}\text{C}$  NMR (151 MHz,  $\text{CDCl}_3$ ) of compound **1d**

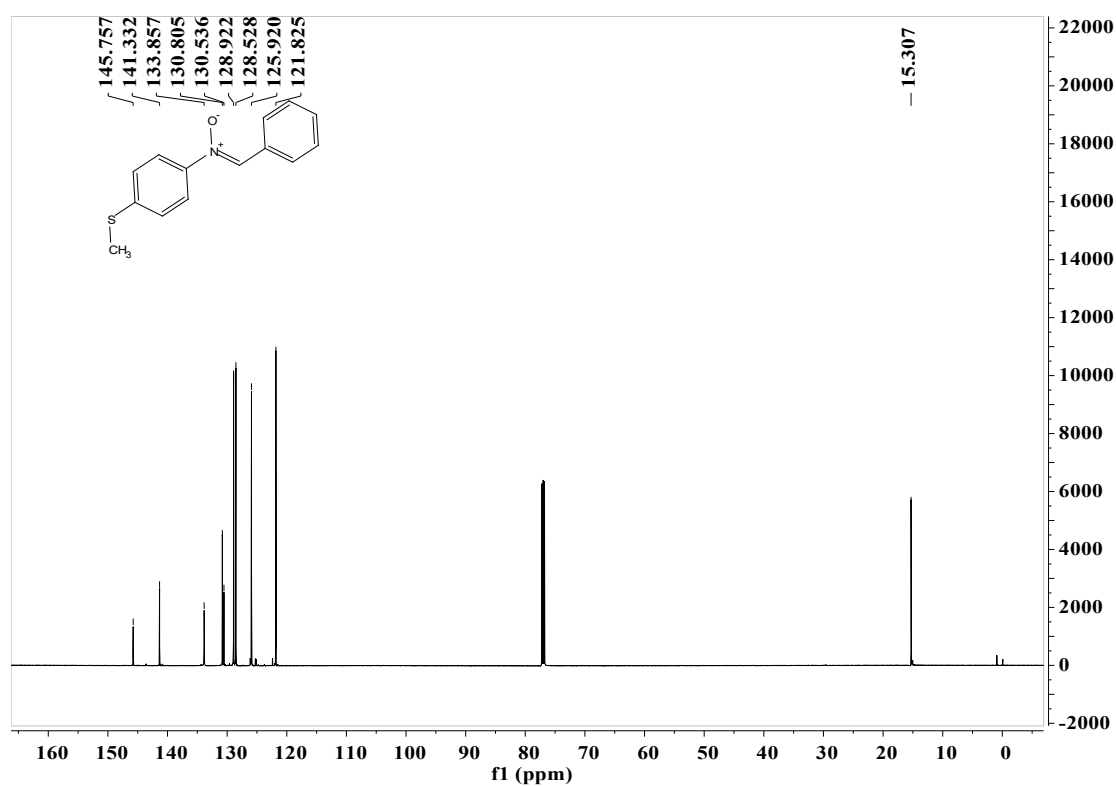

$^1\text{H}$  NMR (600 MHz,  $\text{CDCl}_3$ ) of compound **1e**

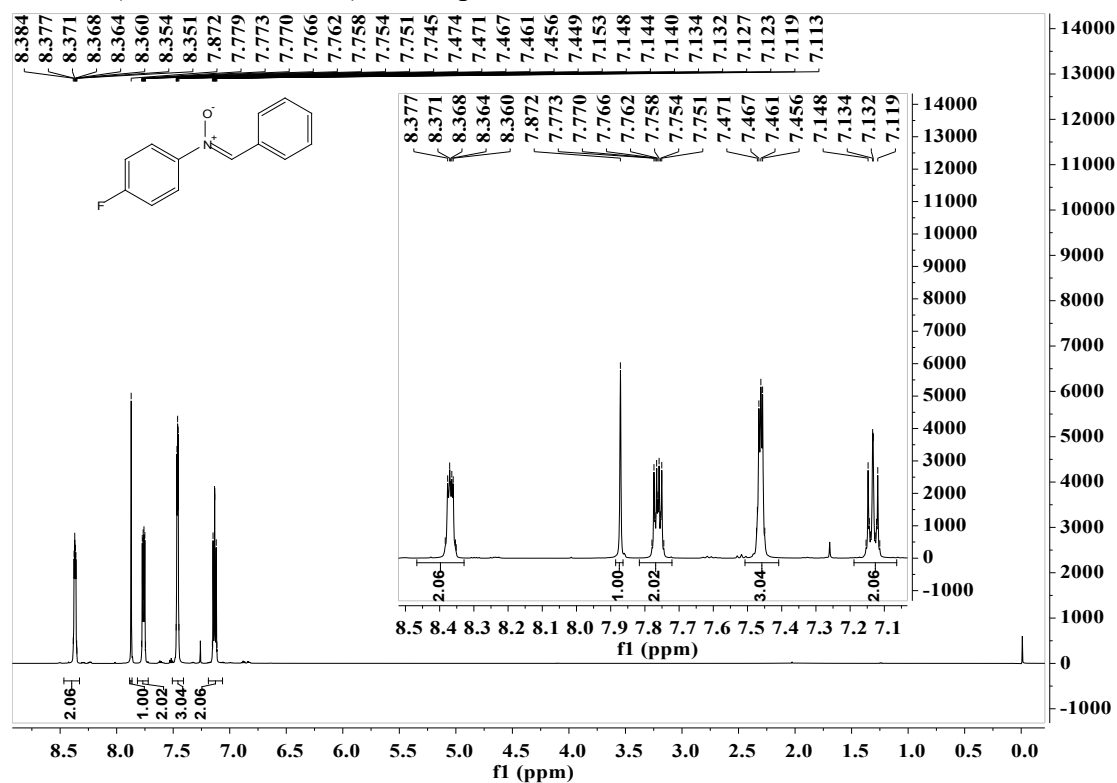

$^{13}\text{C}$  NMR (151 MHz,  $\text{CDCl}_3$ ) of compound **1e**

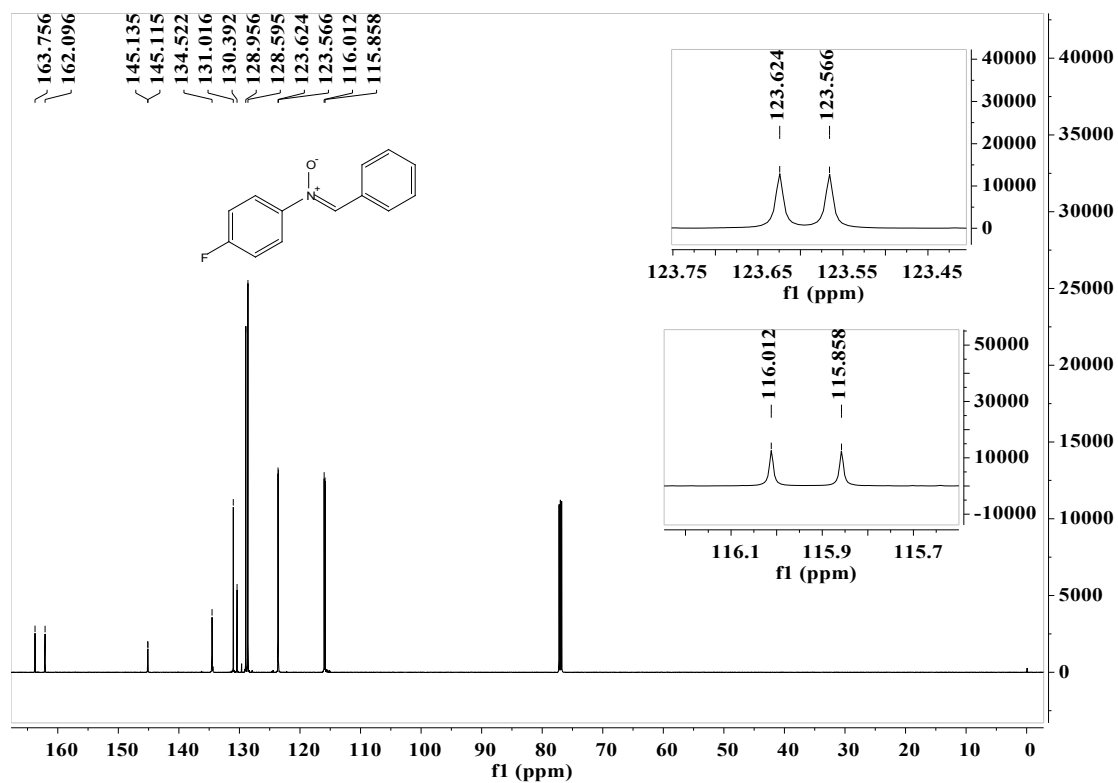

$^1\text{H}$  NMR (600 MHz,  $\text{CDCl}_3$ ) of compound **1f**

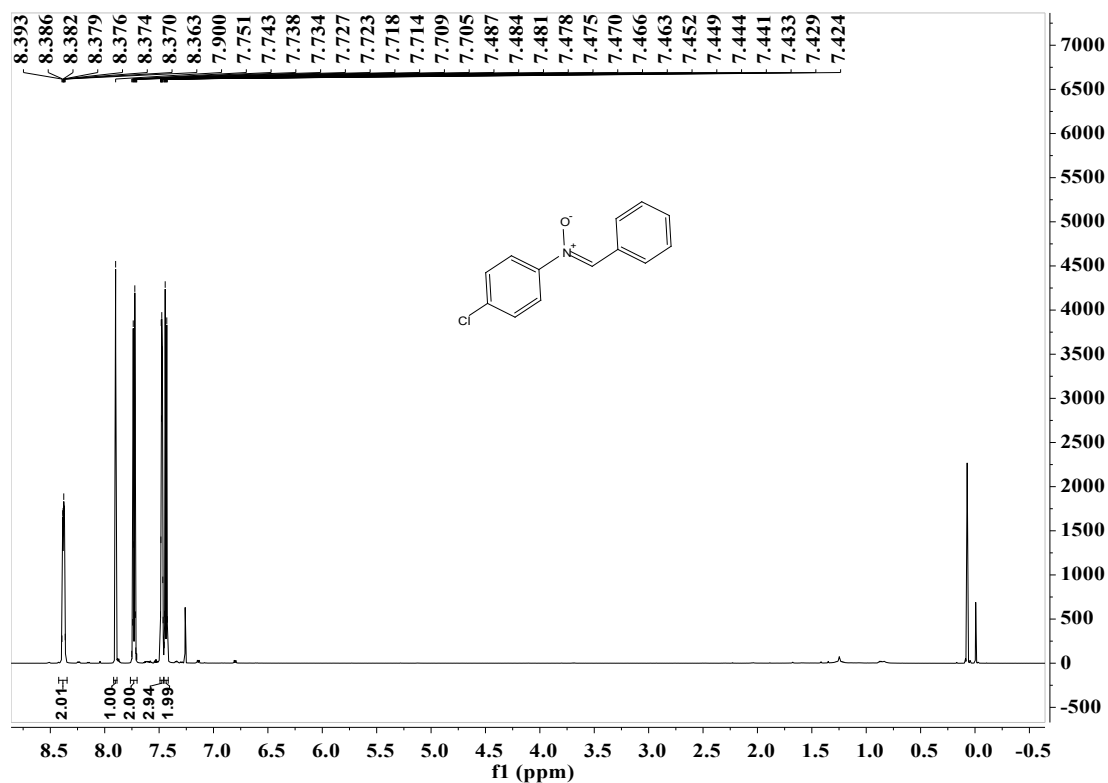

$^{13}\text{C}$  NMR (151 MHz,  $\text{CDCl}_3$ ) of compound **1f**

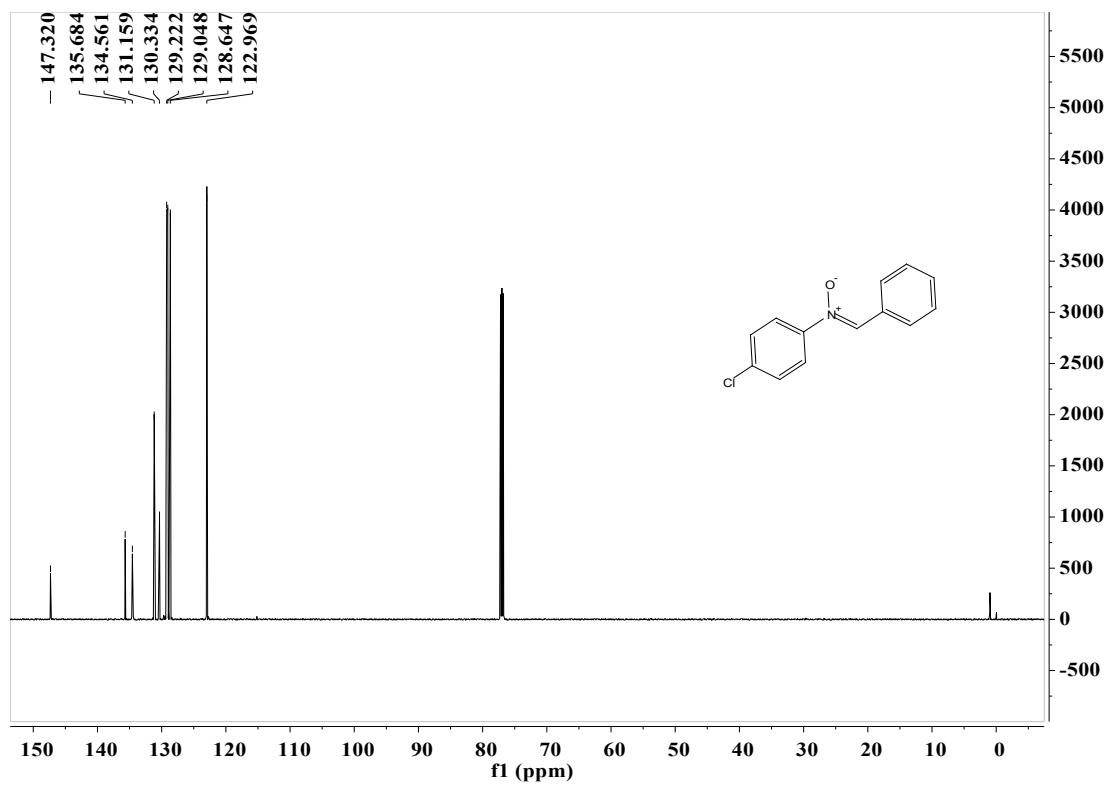

$^1\text{H}$  NMR (600 MHz,  $\text{CDCl}_3$ ) of compound **1g**

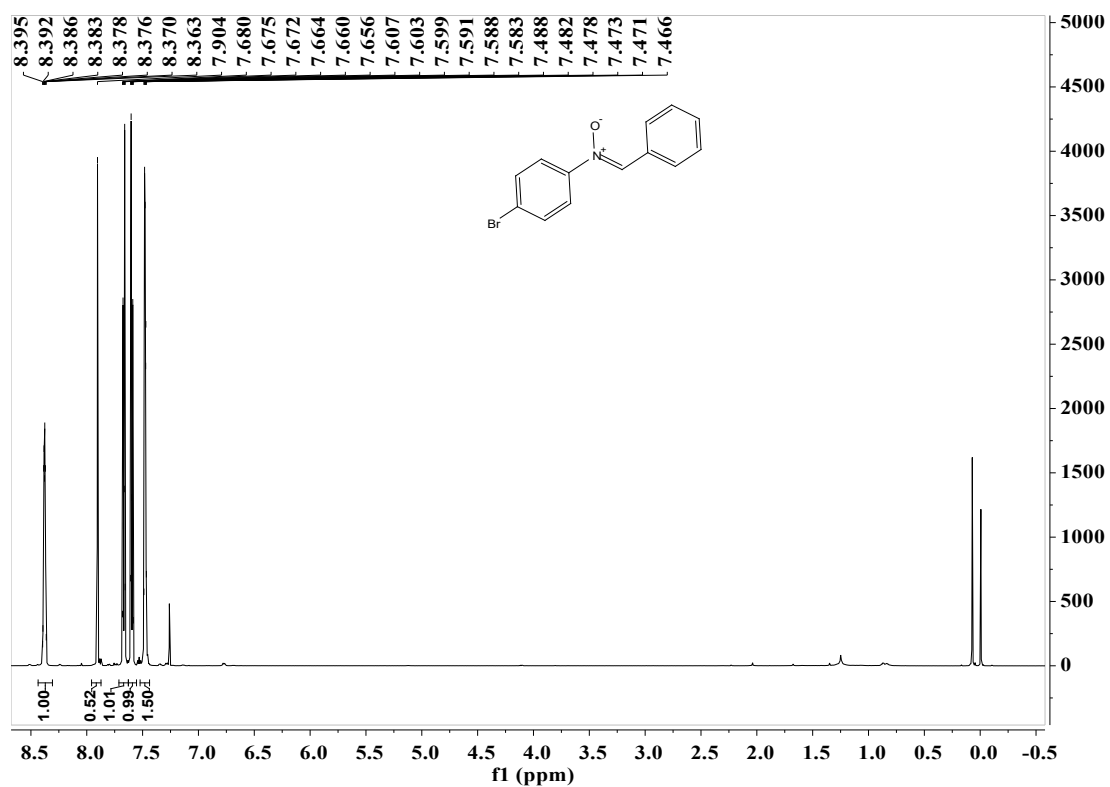

$^{13}\text{C}$  NMR (151 MHz,  $\text{CDCl}_3$ ) of compound **1g**

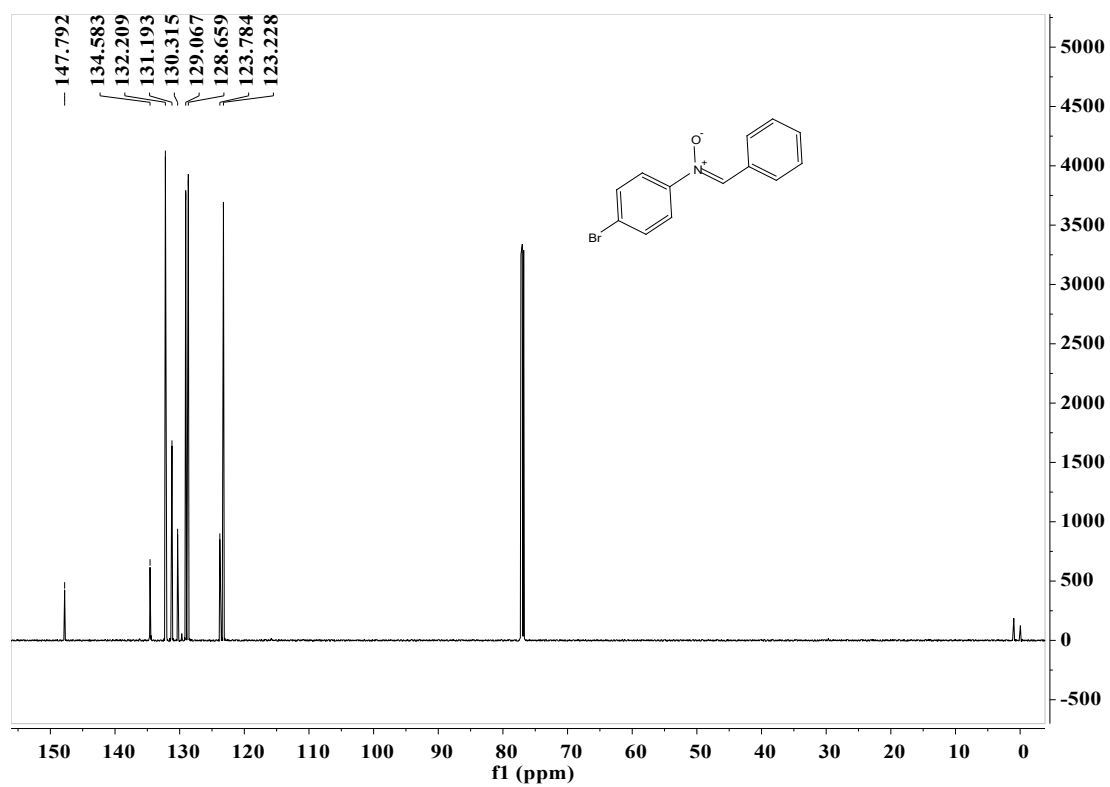

$^1\text{H}$  NMR (600 MHz,  $\text{CDCl}_3$ ) of compound **1h**

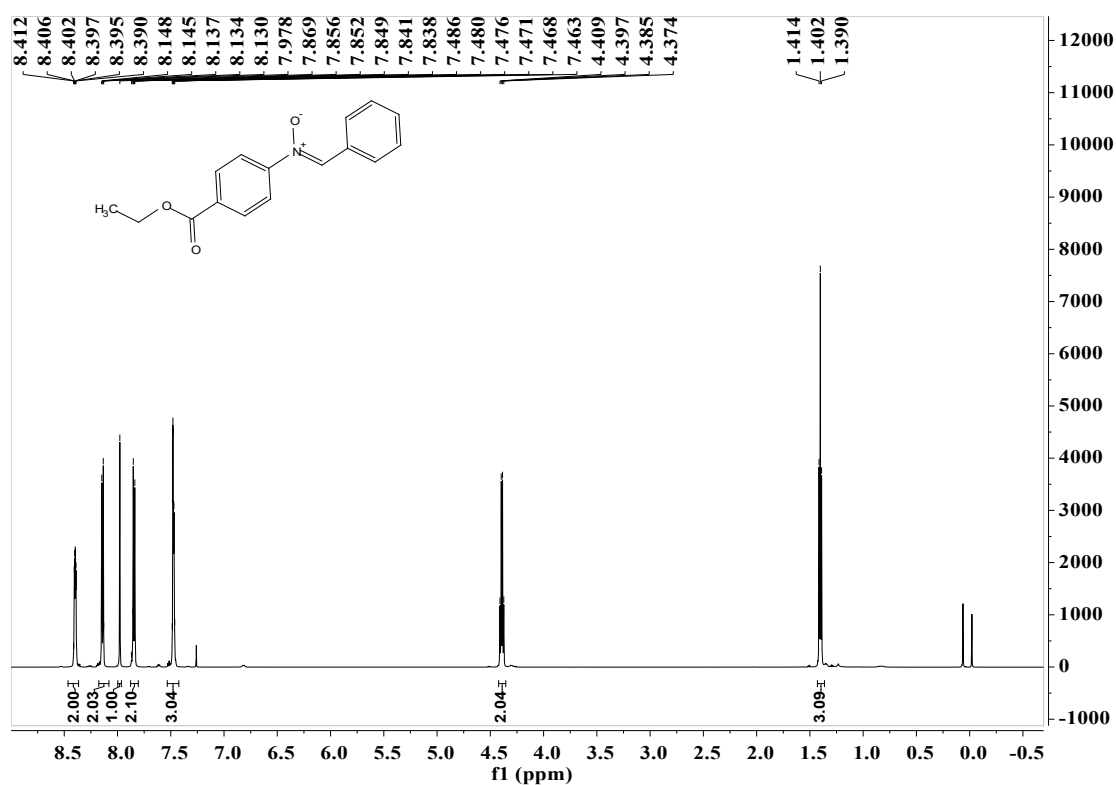

$^{13}\text{C}$  NMR (151 MHz,  $\text{CDCl}_3$ ) of compound **1h**

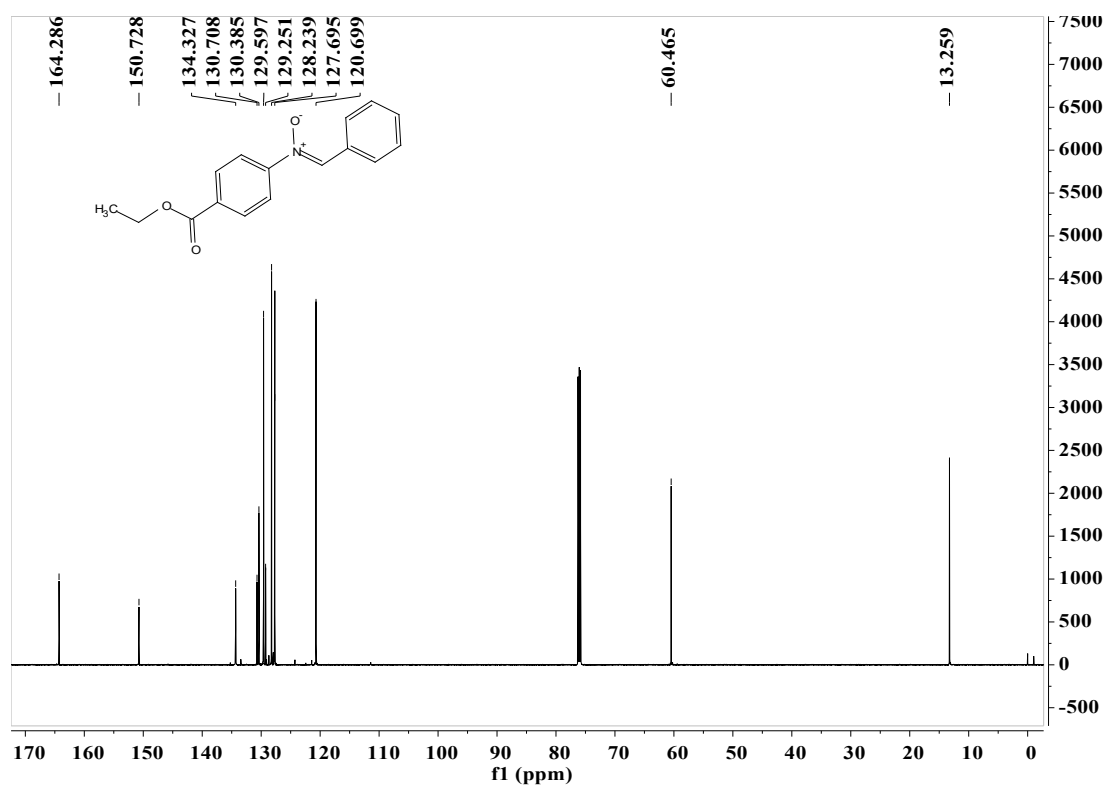



<sup>1</sup>H NMR (600 MHz, CDCl<sub>3</sub>) of compound **1i**

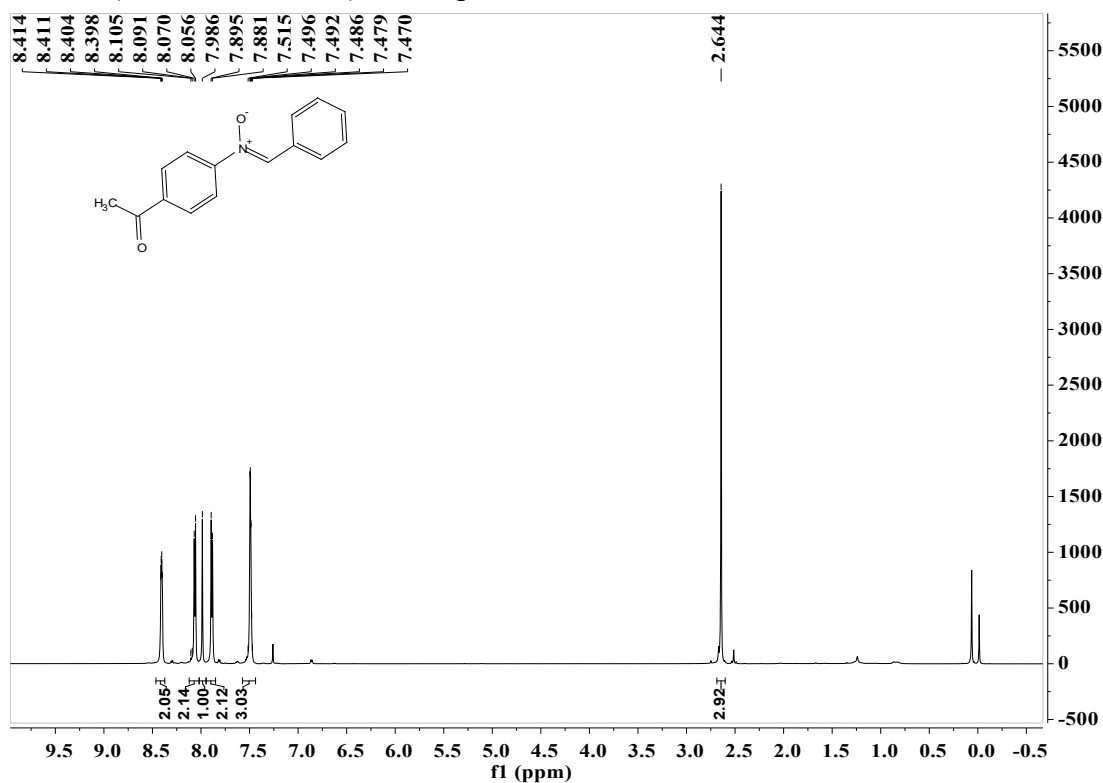

<sup>13</sup>C NMR (151 MHz, CDCl<sub>3</sub>) of compound **1i**

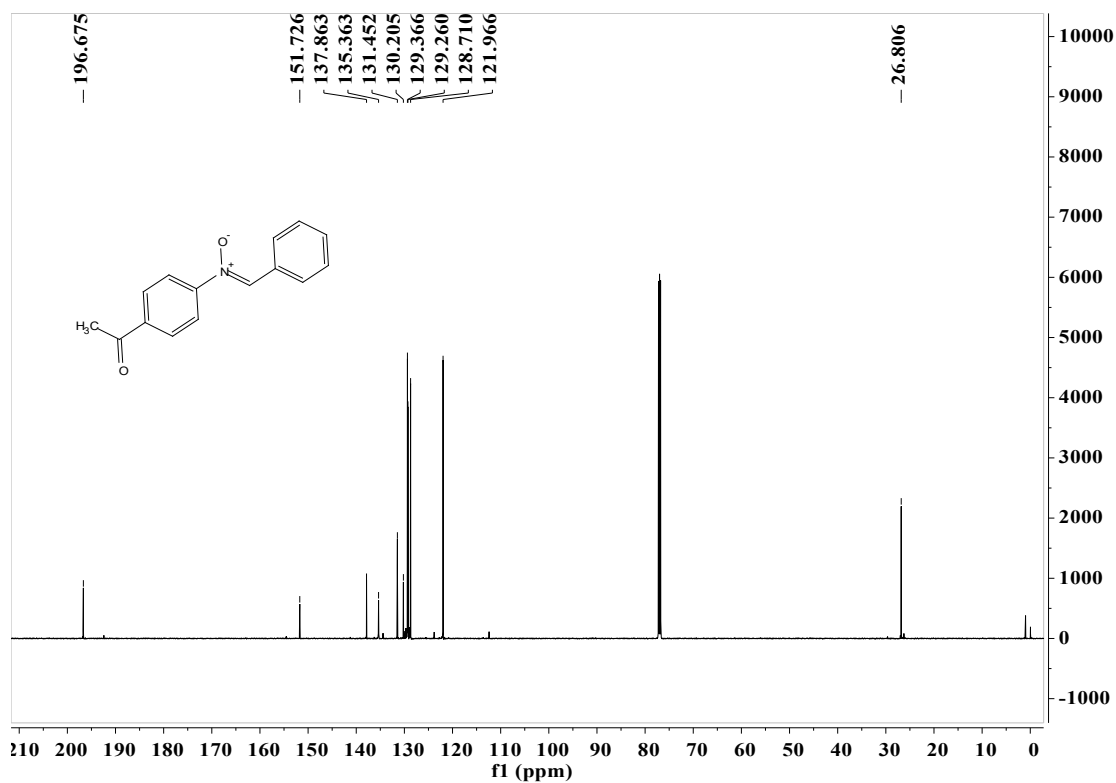

<sup>1</sup>H NMR (600 MHz, CDCl<sub>3</sub>) of compound **1j**

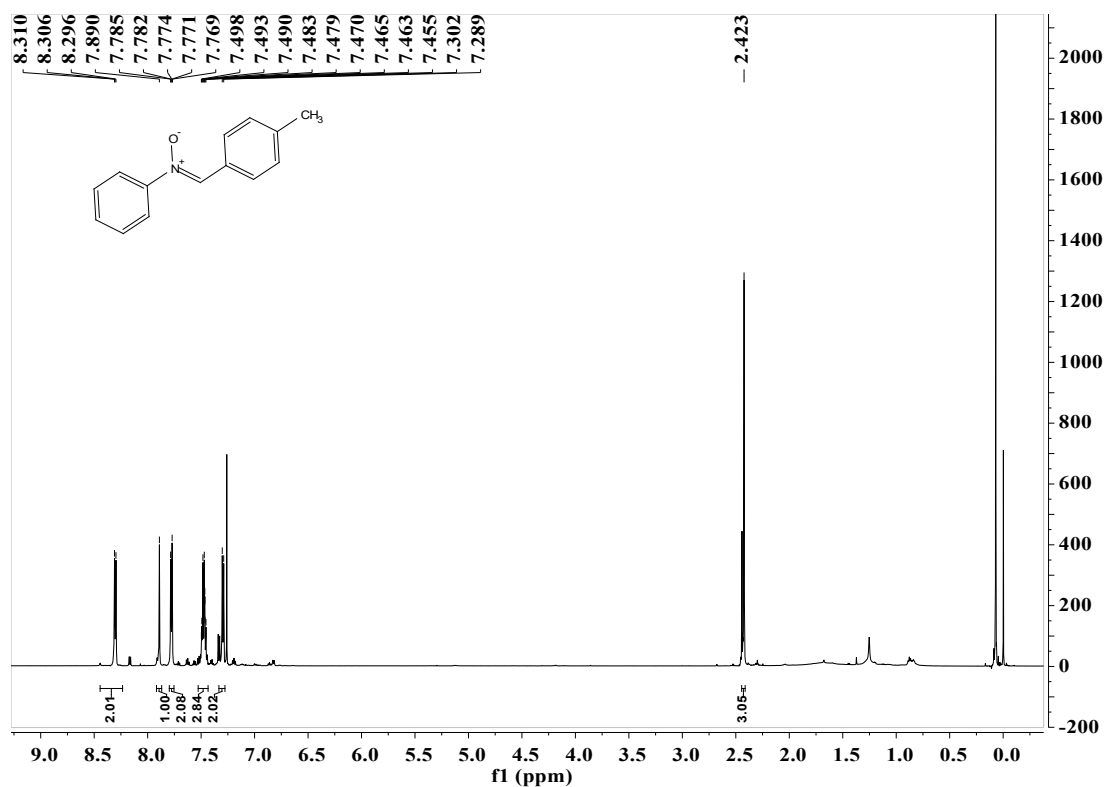

<sup>1</sup>H NMR (600 MHz, CDCl<sub>3</sub>) of compound **1k**

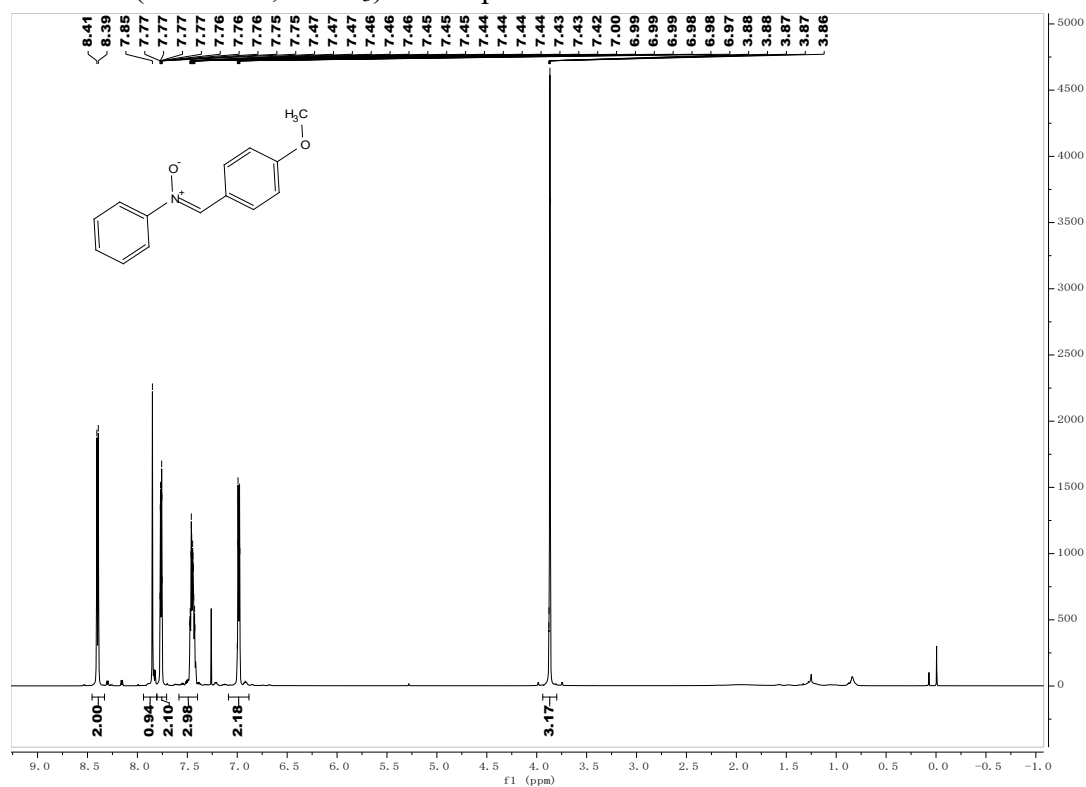

<sup>1</sup>H NMR (600 MHz, CDCl<sub>3</sub>) of compound **1l**

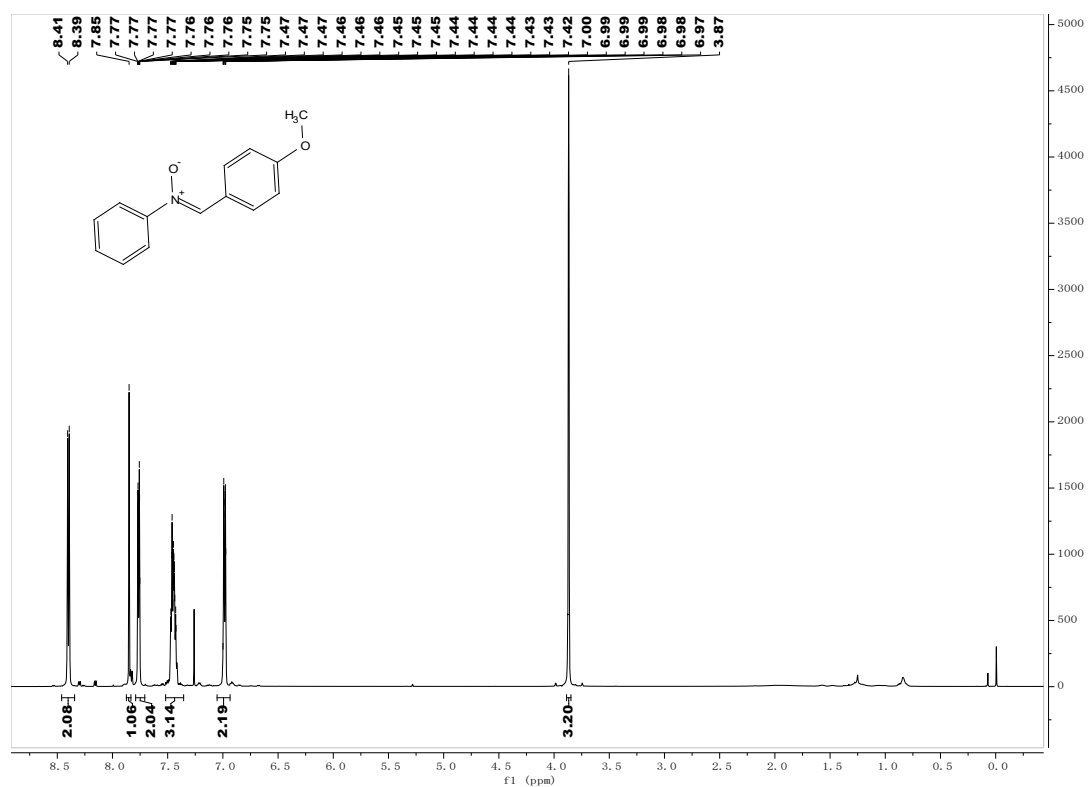

<sup>1</sup>H NMR (600 MHz, CDCl<sub>3</sub>) of compound **1m**

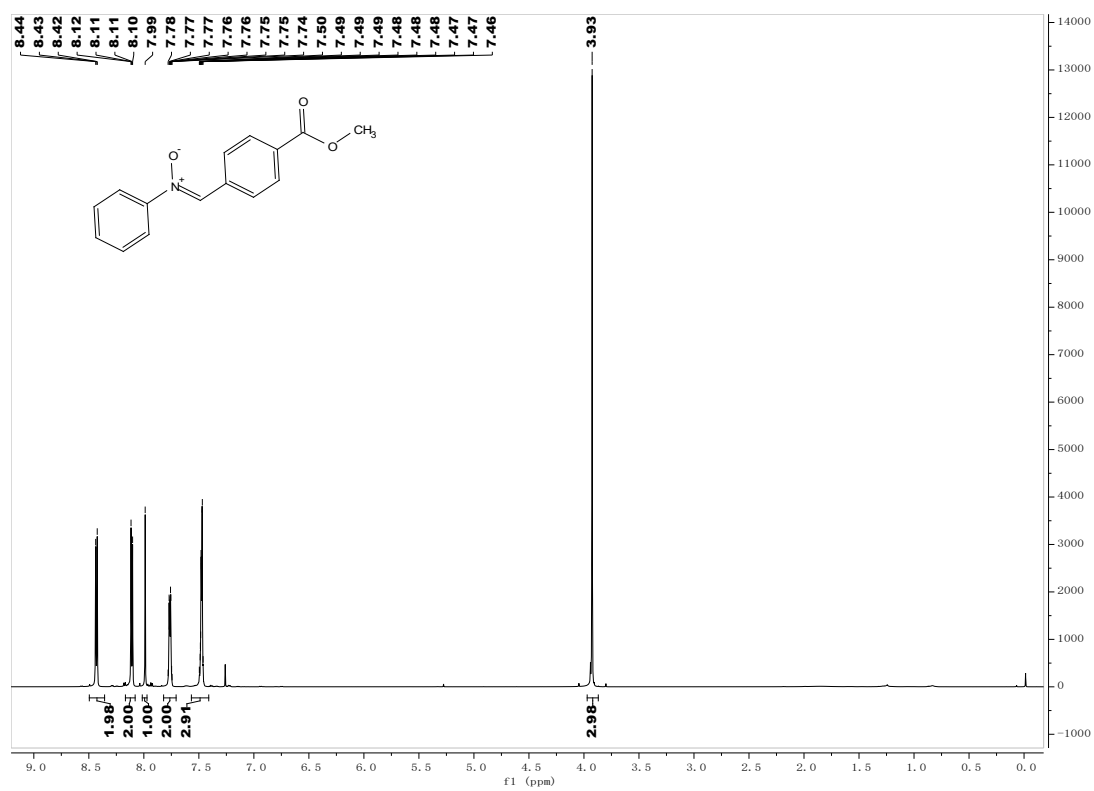

$^1\text{H}$  NMR (600 MHz,  $\text{CDCl}_3$ ) of compound **1n**

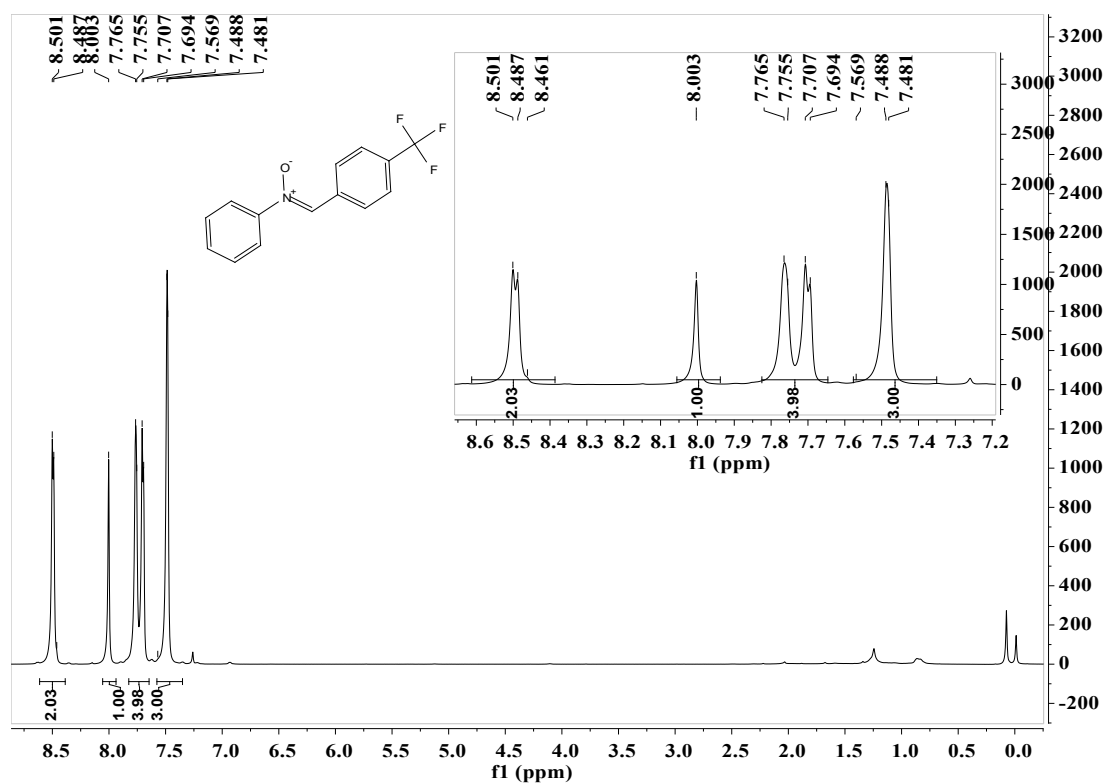

$^{13}\text{C}$  NMR (151 MHz,  $\text{CDCl}_3$ ) of compound **1n**

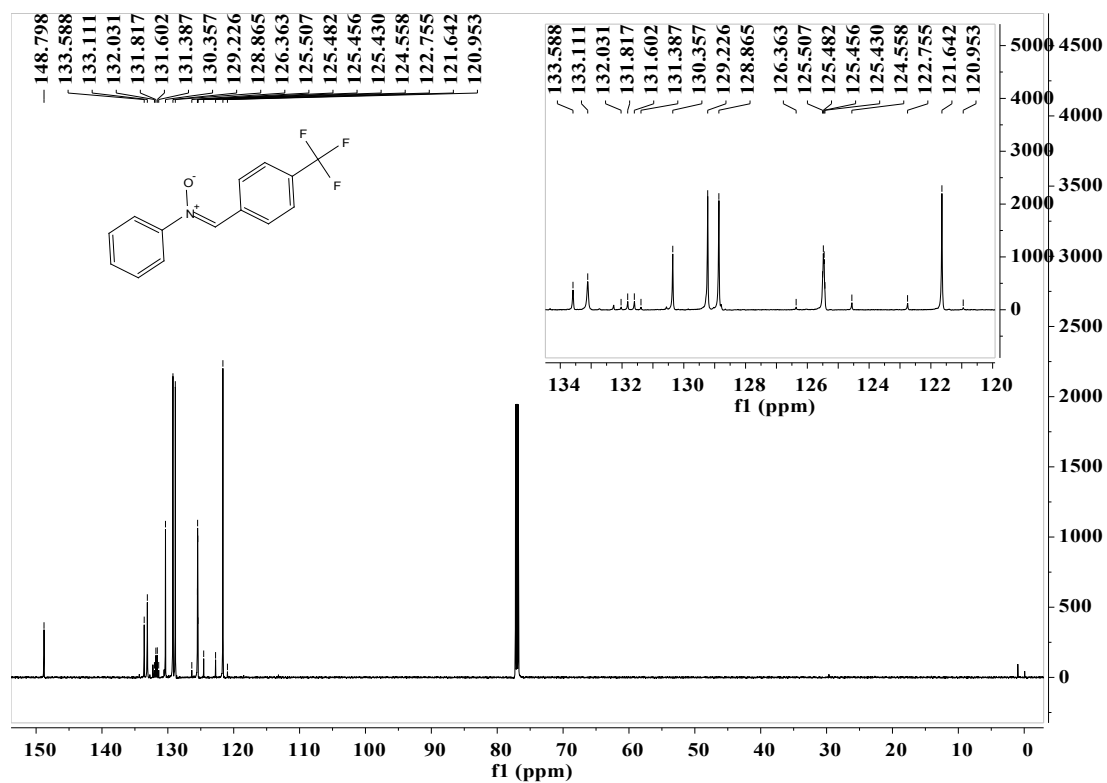

<sup>1</sup>H NMR (600 MHz, CDCl<sub>3</sub>) of compound **1o**

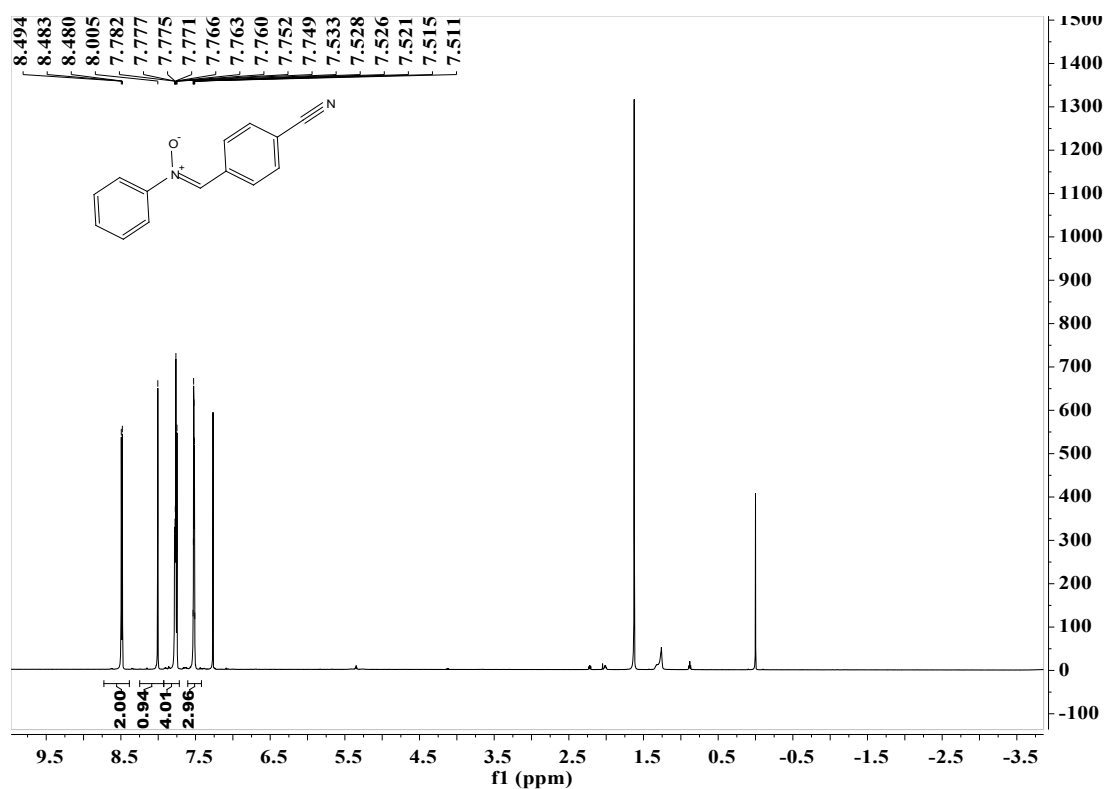

<sup>1</sup>H NMR (600 MHz, CDCl<sub>3</sub>) of compound **1p**

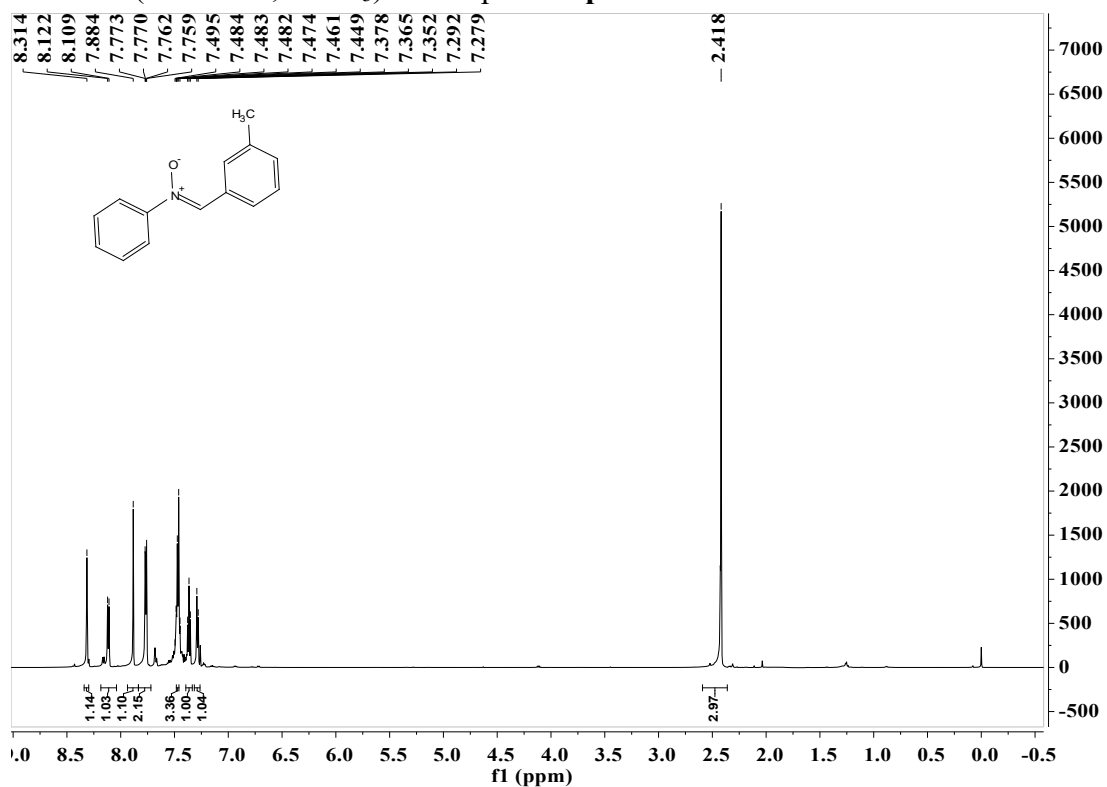

$^1\text{H}$  NMR (600 MHz,  $\text{CDCl}_3$ ) of compound **1q**

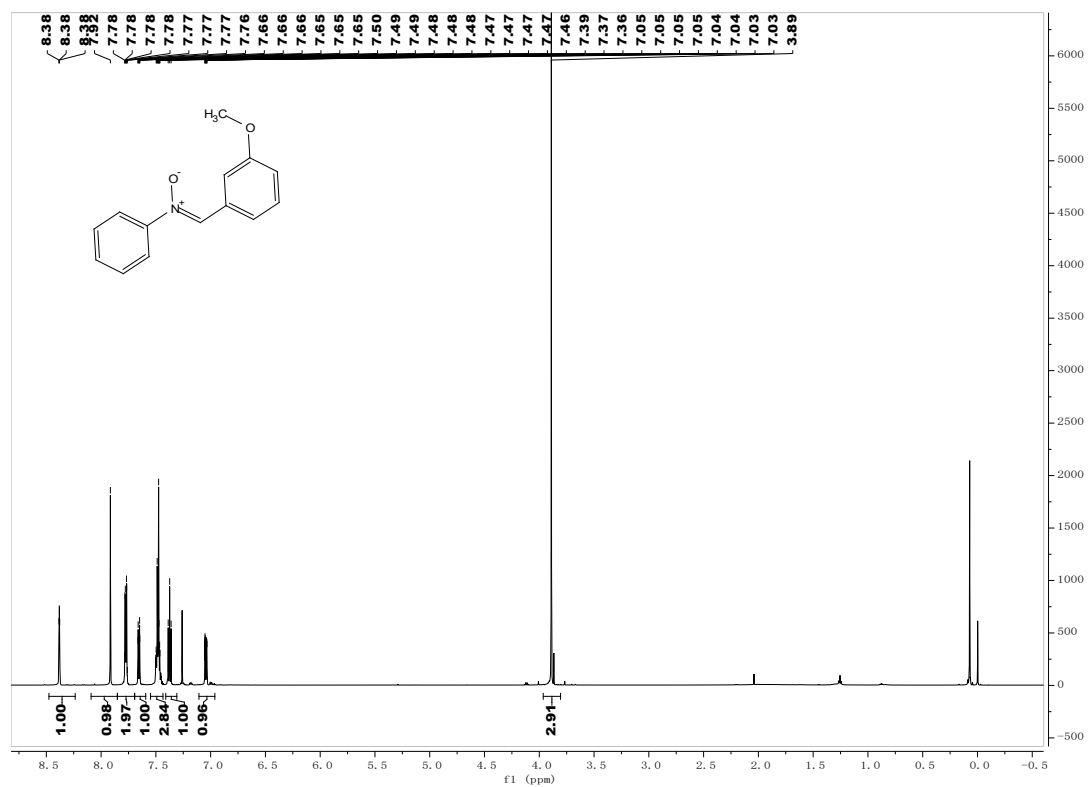

<sup>1</sup>H NMR (600 MHz, CDCl<sub>3</sub>) of compound **1r**

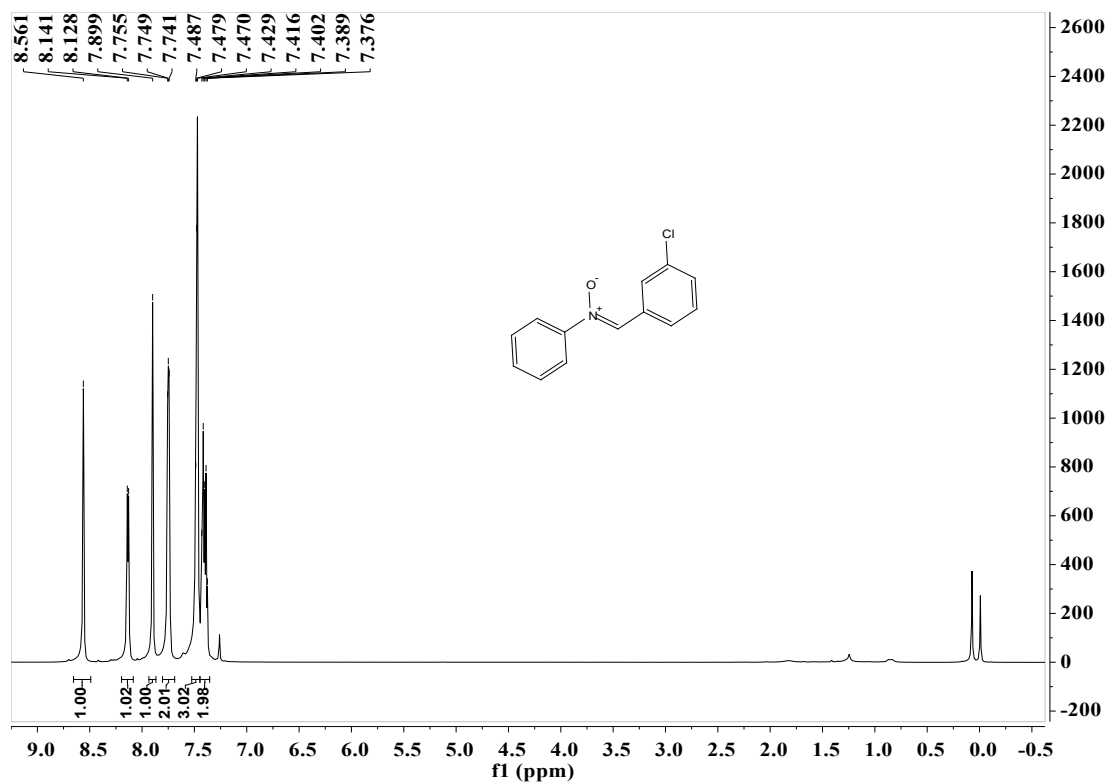

<sup>13</sup>C NMR (151 MHz, CDCl<sub>3</sub>) of compound **1r**

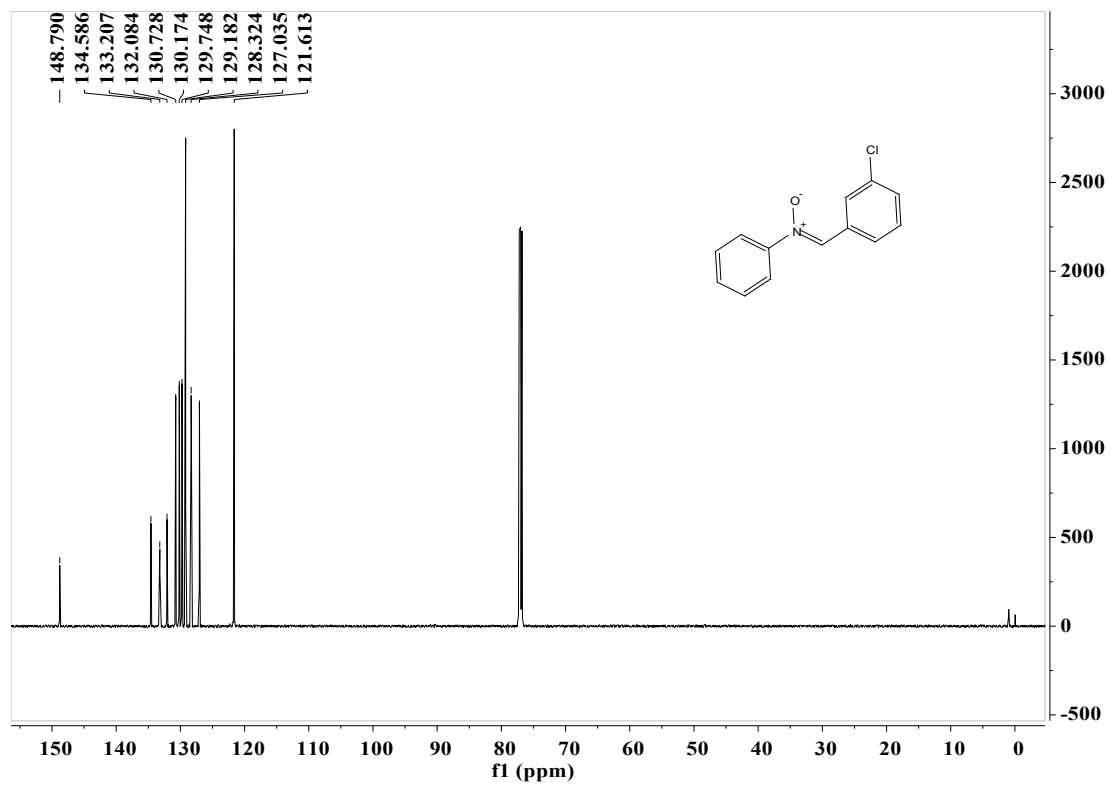

$^1\text{H}$  NMR (600 MHz,  $\text{CDCl}_3$ ) of compound **1s**

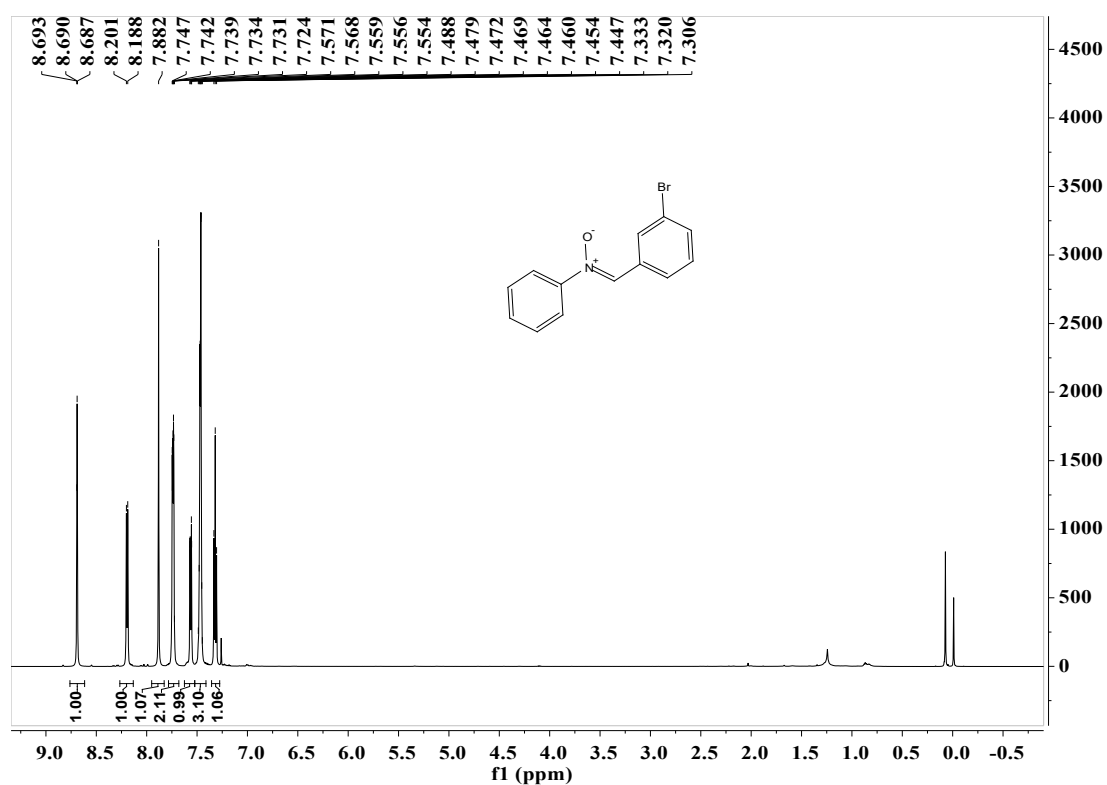

$^{13}\text{C}$  NMR (151 MHz,  $\text{CDCl}_3$ ) of compound **1s**

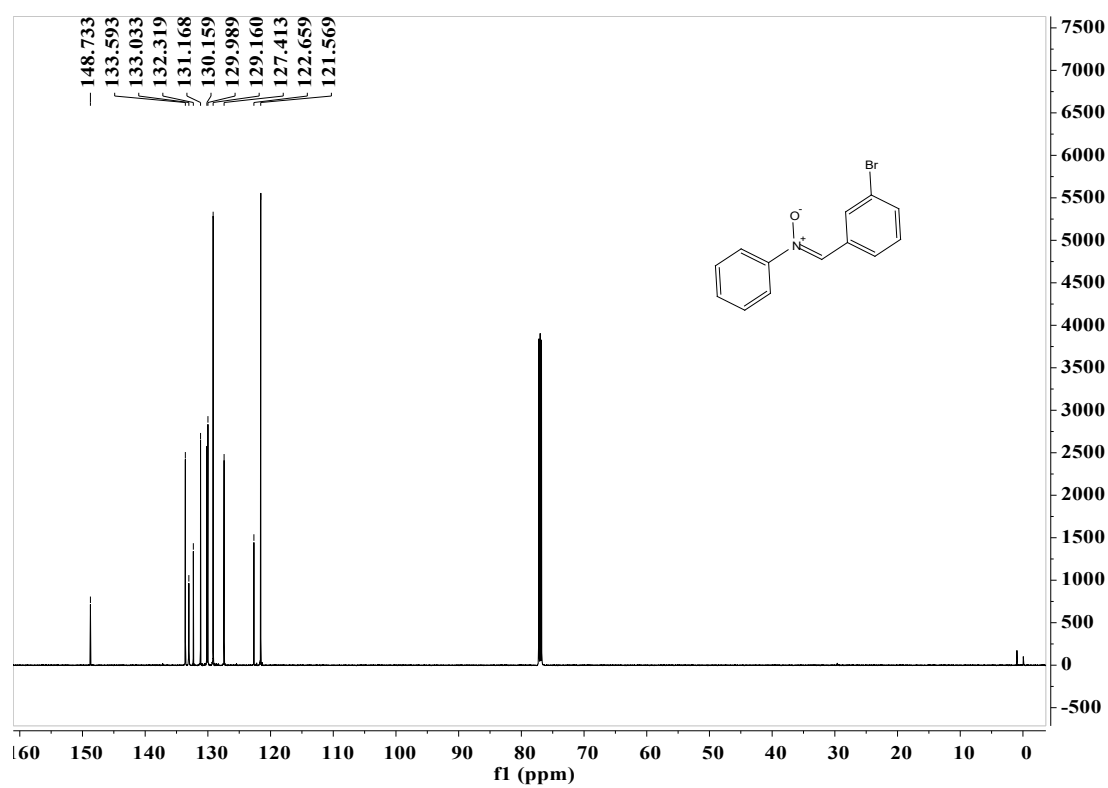



$^1\text{H}$  NMR (600 MHz,  $\text{CDCl}_3$ ) of compound **1t**

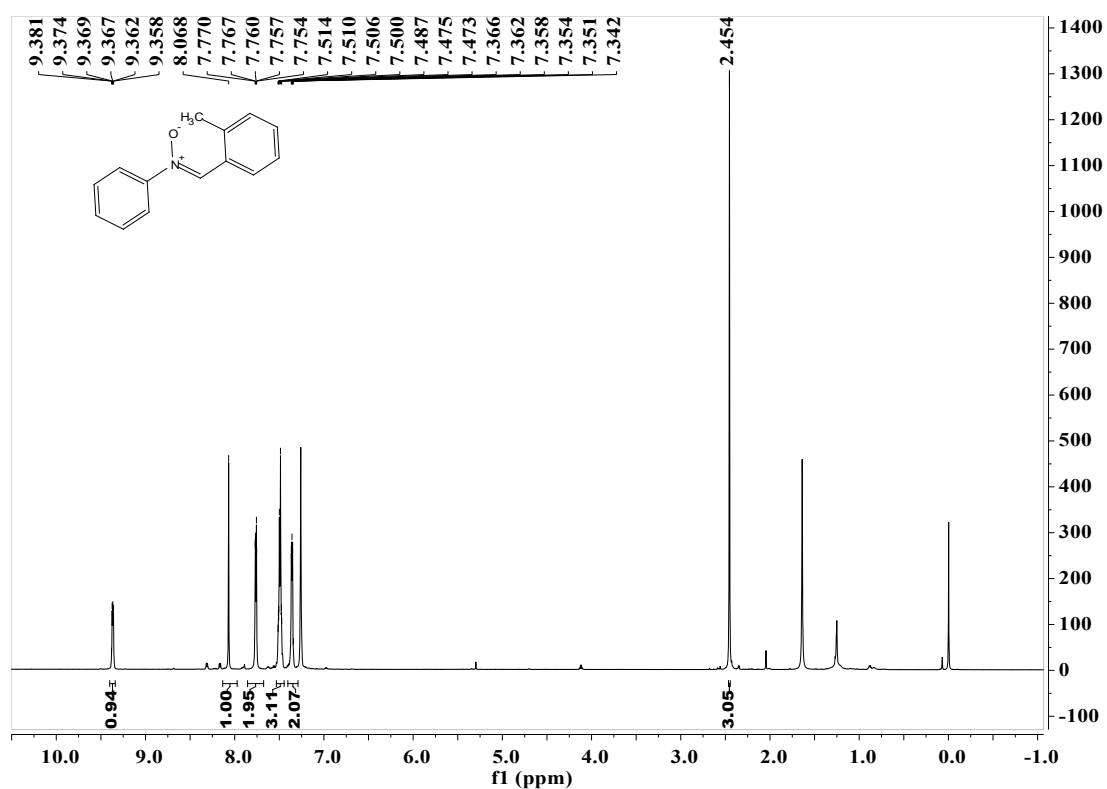

$^1\text{H}$  NMR (600 MHz,  $\text{CDCl}_3$ ) of compound **1u**

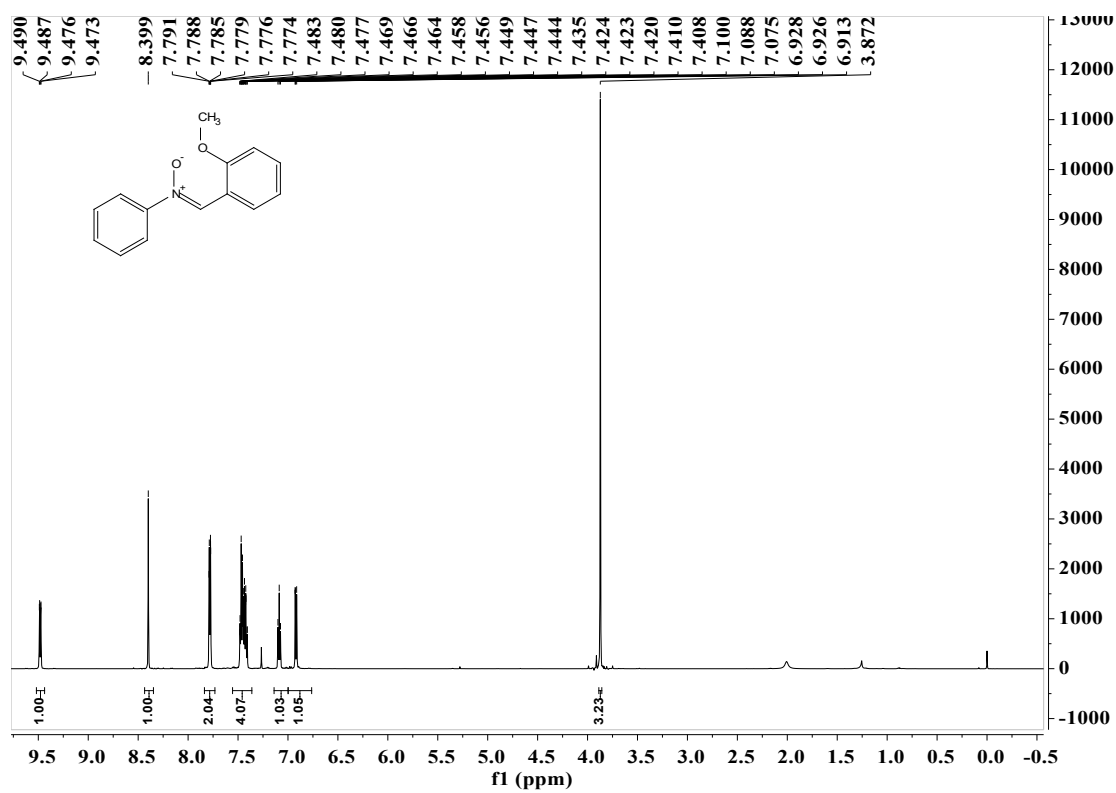

<sup>1</sup>H NMR (600 MHz, CDCl<sub>3</sub>) of compound **1v**

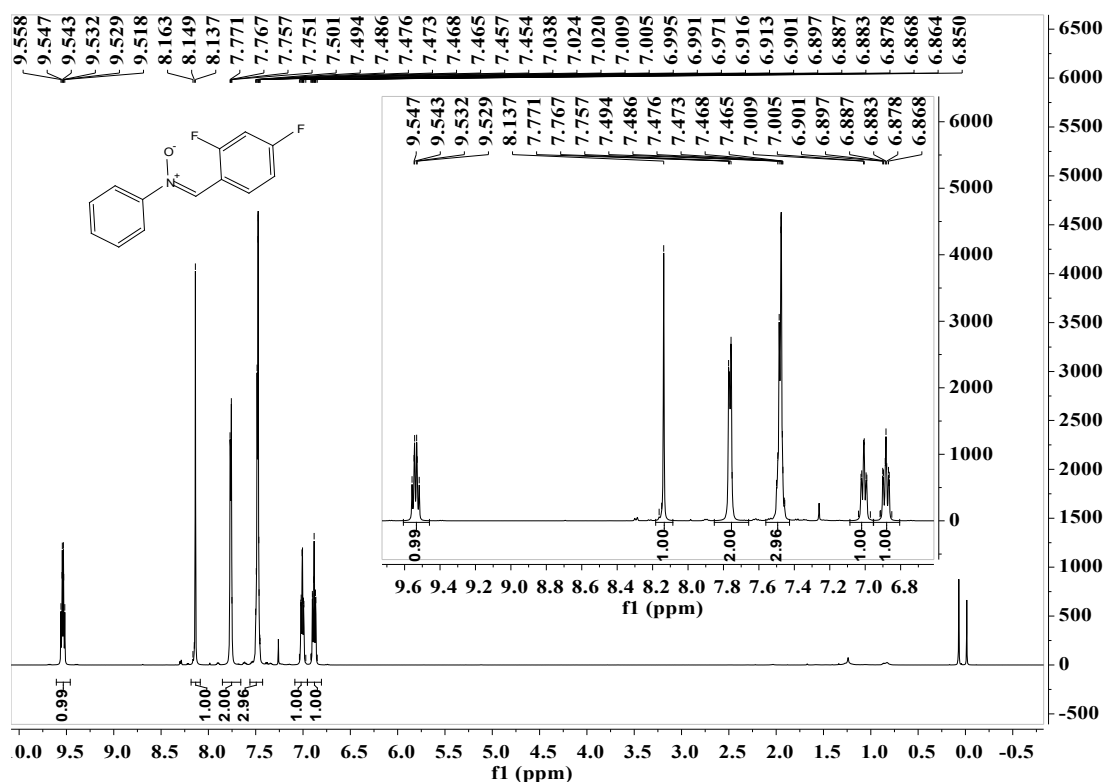

<sup>13</sup>C NMR (151 MHz, CDCl<sub>3</sub>) of compound **1v**

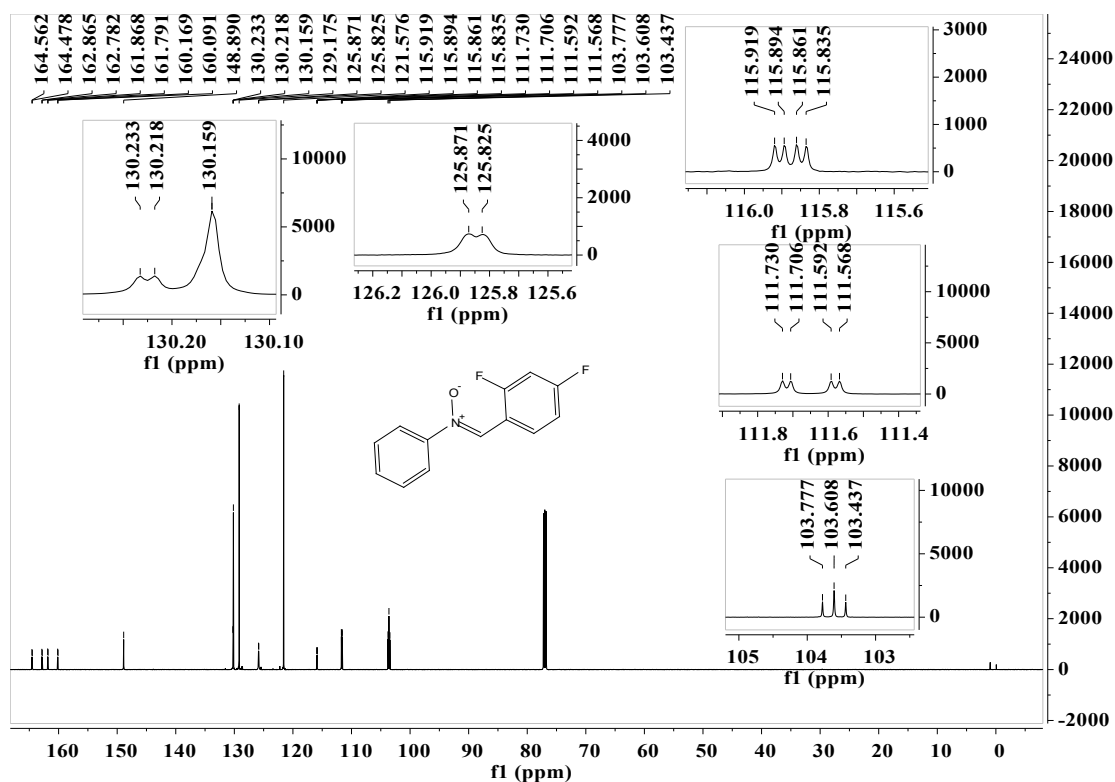

<sup>1</sup>H NMR (600 MHz, CDCl<sub>3</sub>) of compound **1w**

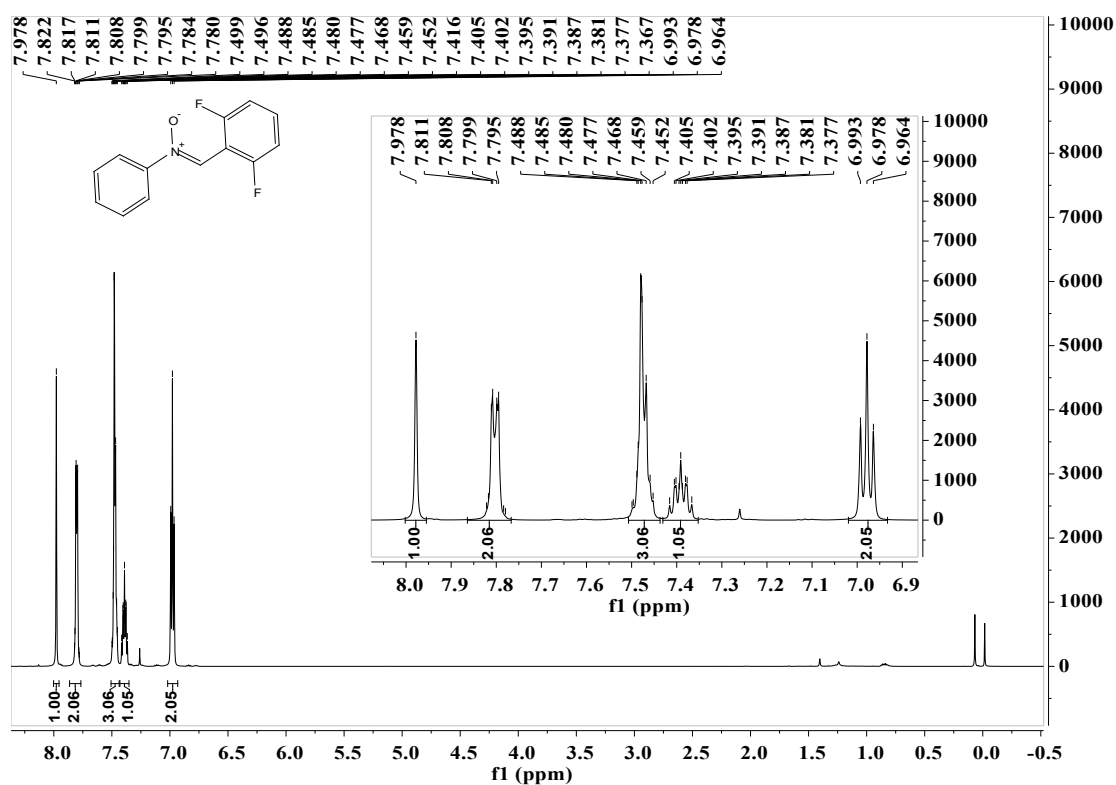

<sup>13</sup>C NMR (151 MHz, CDCl<sub>3</sub>) of compound **1w**

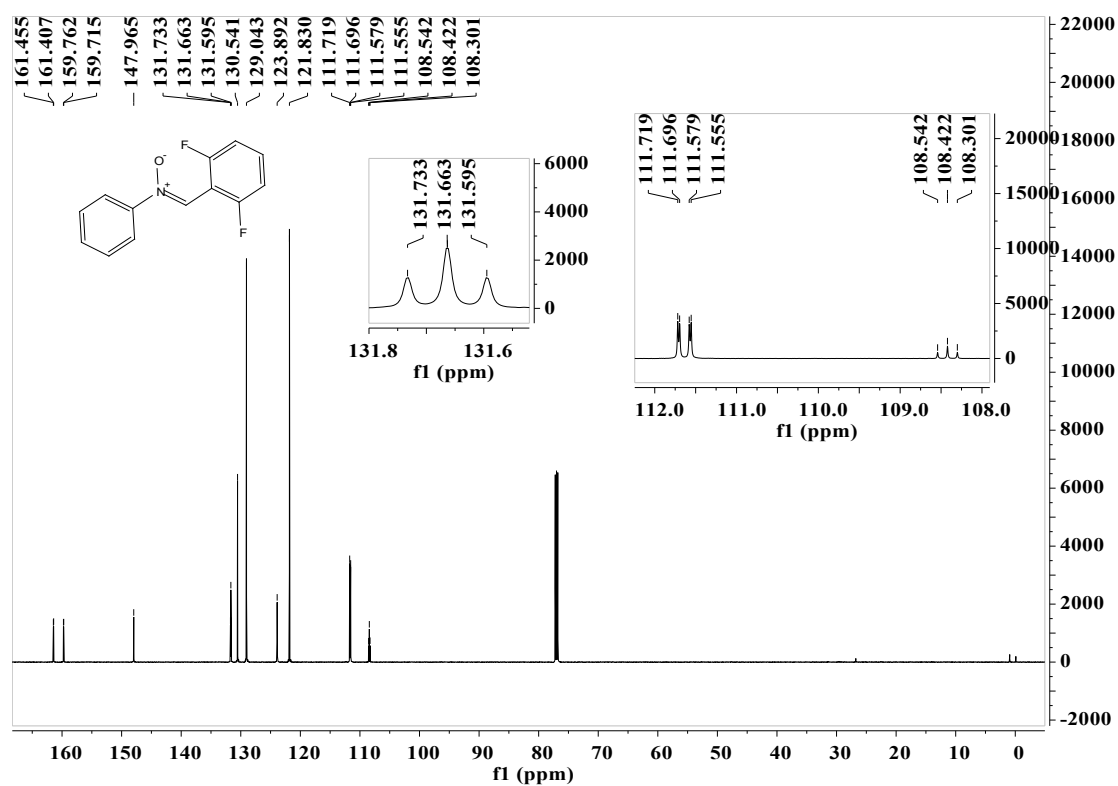

$^1\text{H}$  NMR (600 MHz,  $\text{CDCl}_3$ ) of compound **1x**

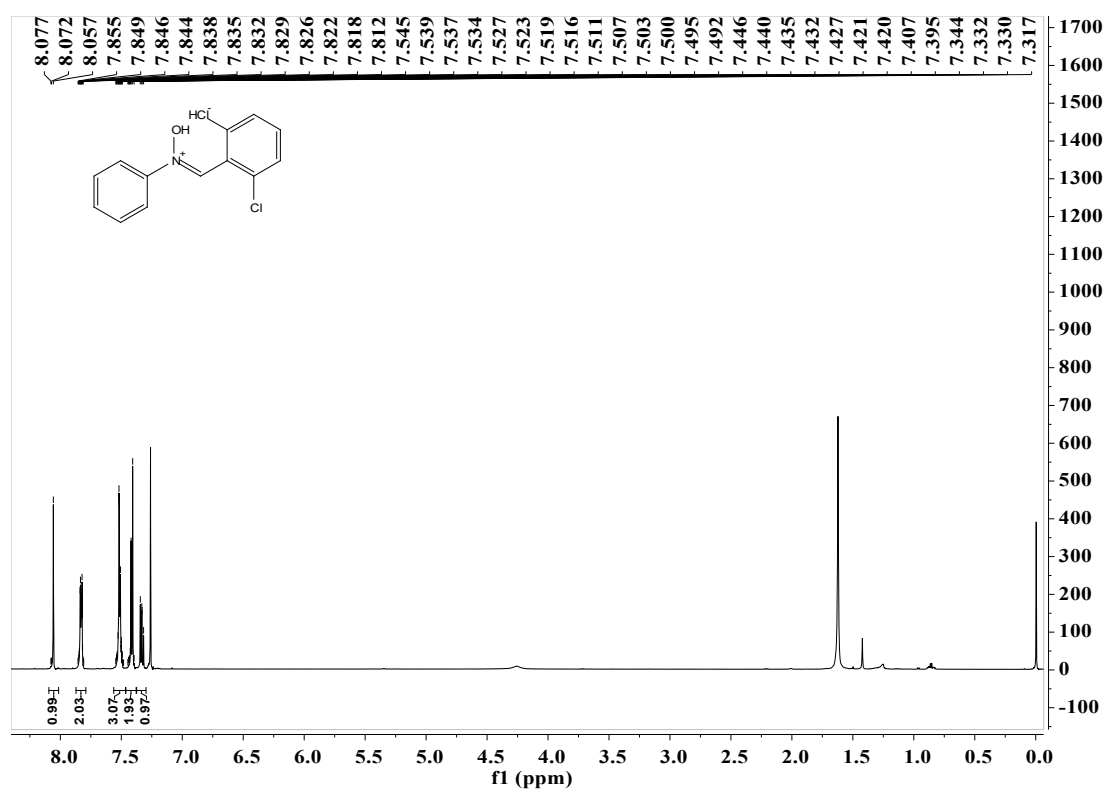

$^1\text{H}$  NMR (600 MHz,  $\text{CDCl}_3$ ) of compound **1y**

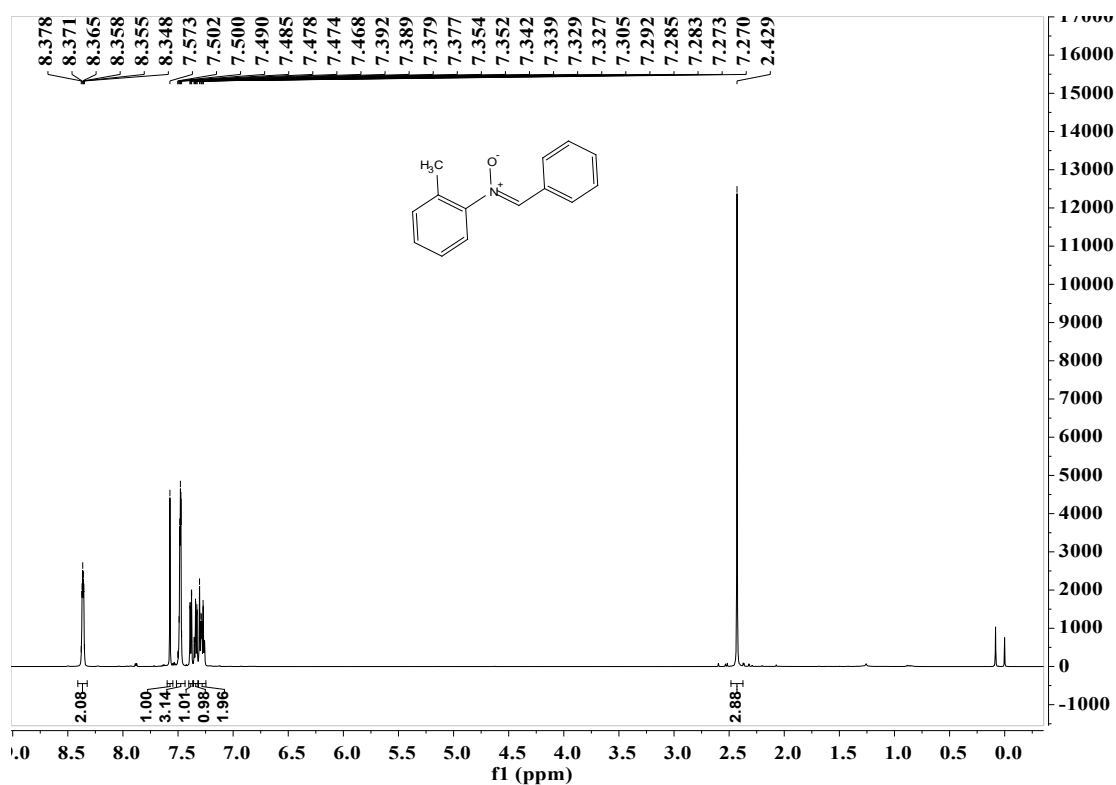

$^{13}\text{C}$  NMR (151 MHz,  $\text{CDCl}_3$ ) of compound **1y**

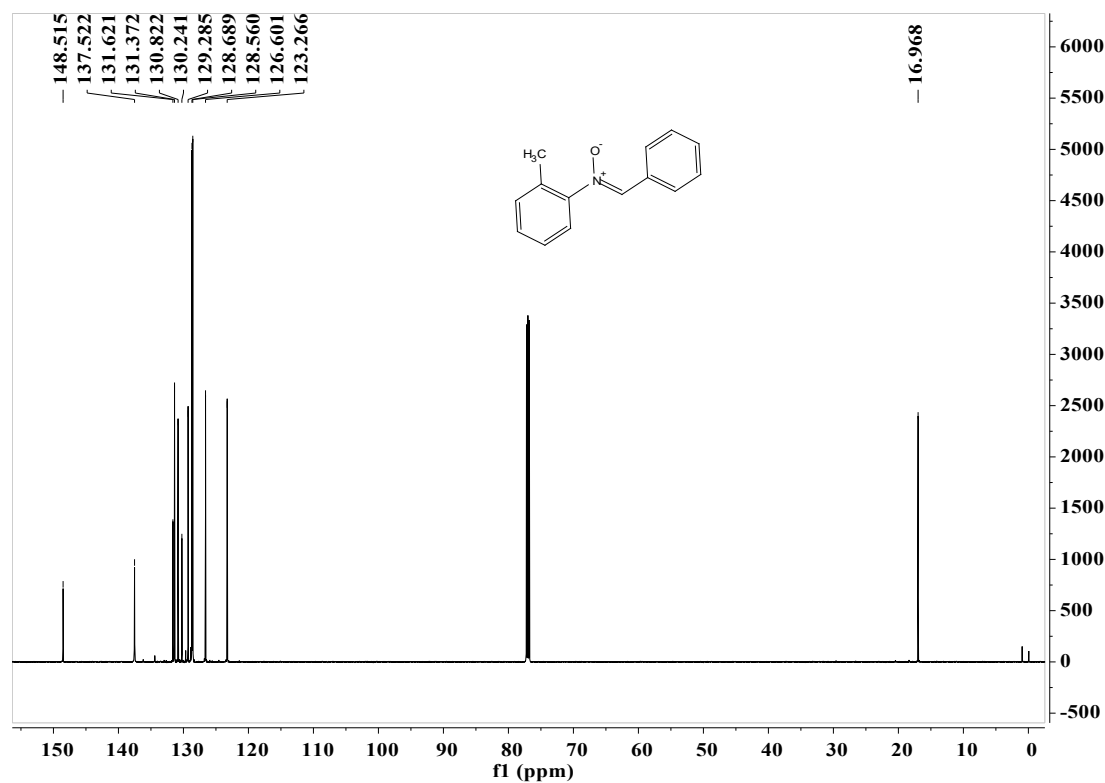

<sup>1</sup>H NMR (600 MHz, CDCl<sub>3</sub>) of compound **1z**

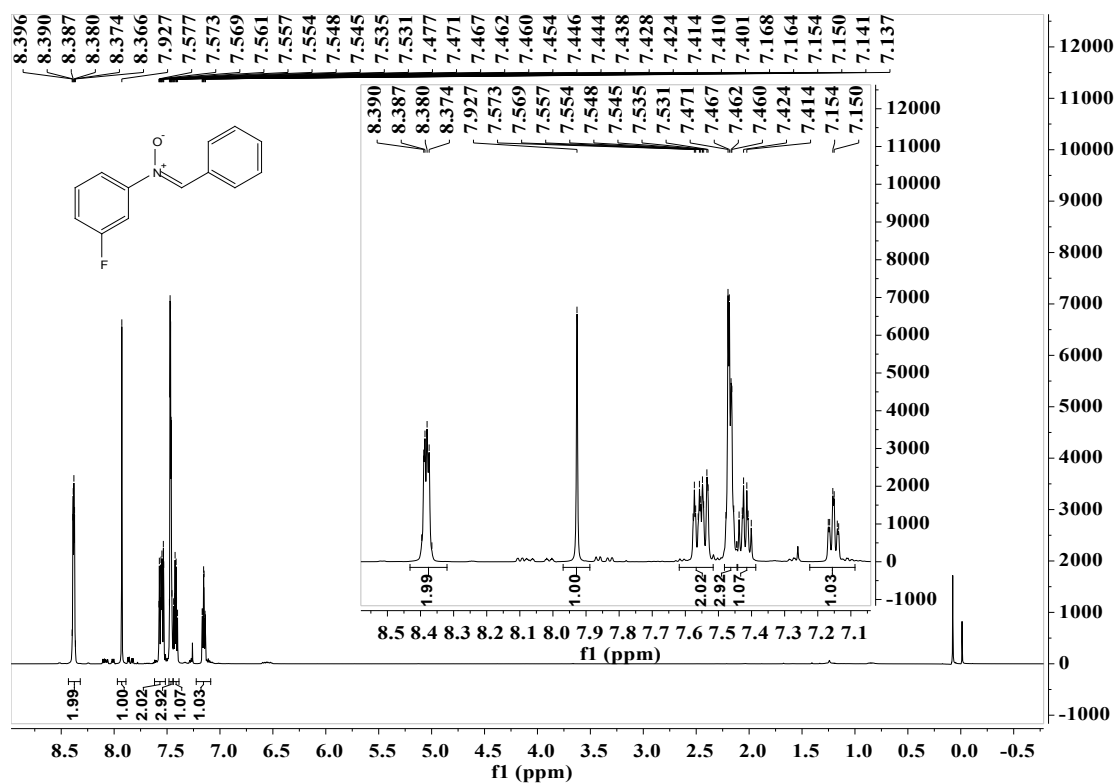

<sup>13</sup>C NMR (151 MHz, CDCl<sub>3</sub>) of compound **1z**

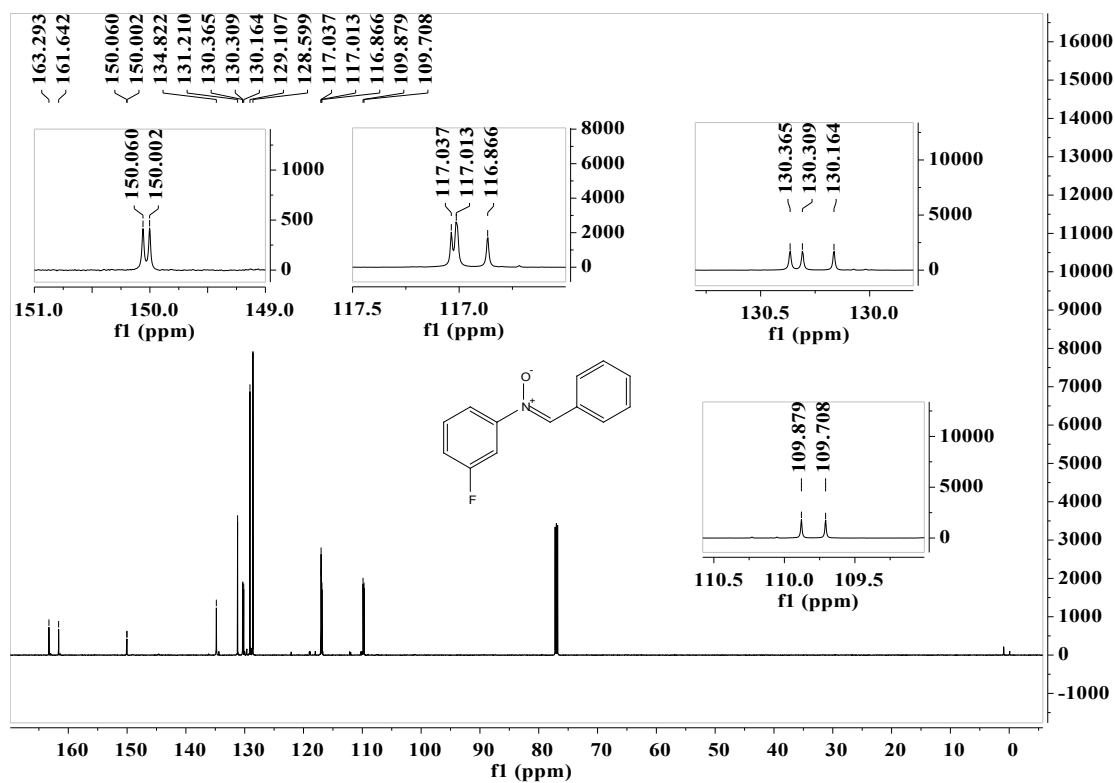

<sup>1</sup>H NMR (600 MHz, CDCl<sub>3</sub>) of compound **1aa**

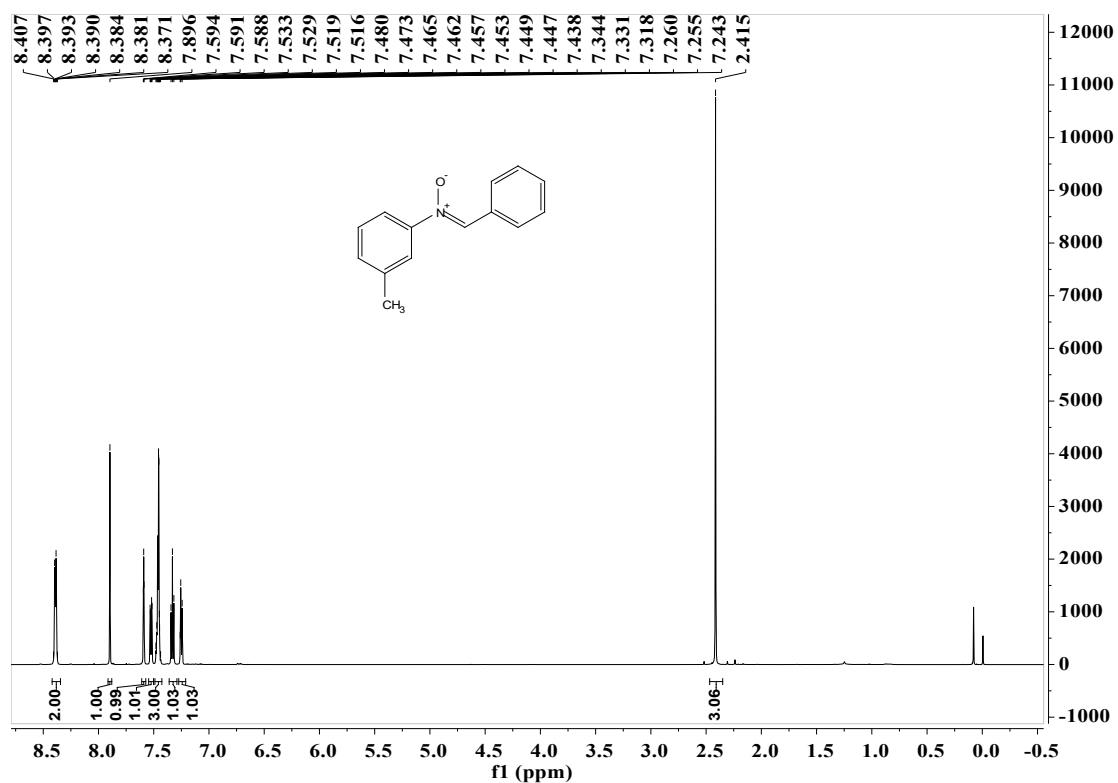

<sup>13</sup>C NMR (151 MHz, CDCl<sub>3</sub>) of compound **1aa**

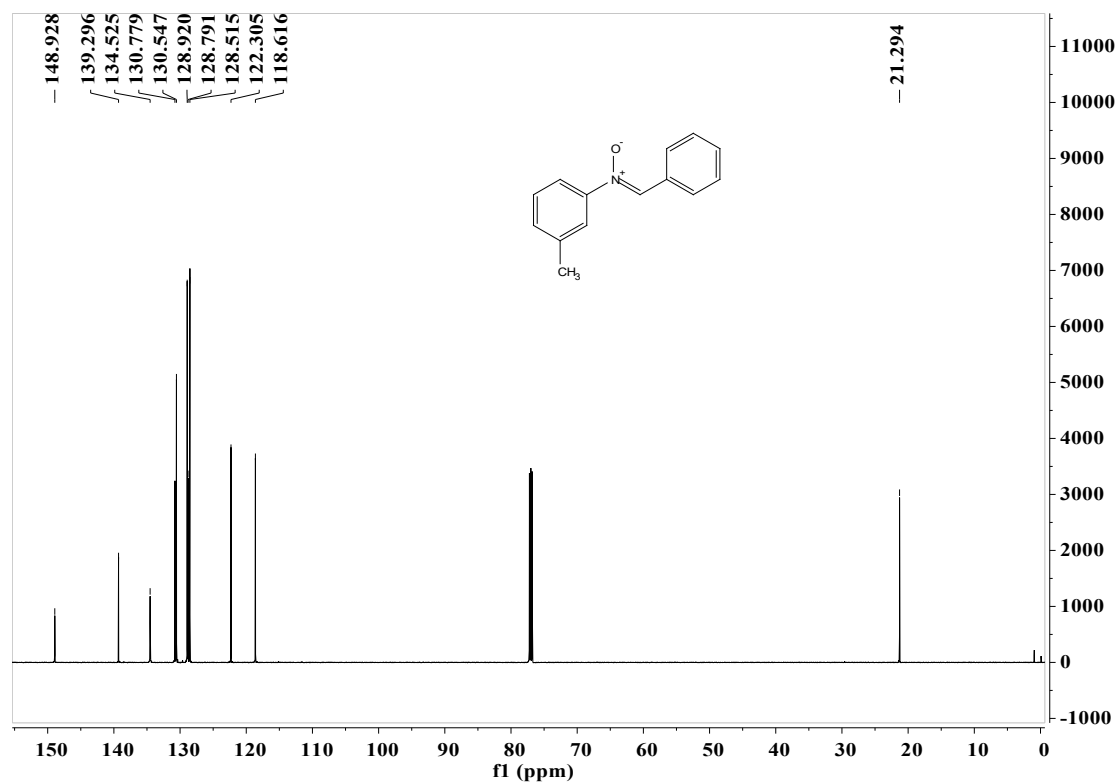

$^1\text{H}$  NMR (600 MHz,  $\text{CDCl}_3$ ) of compound **1ab**

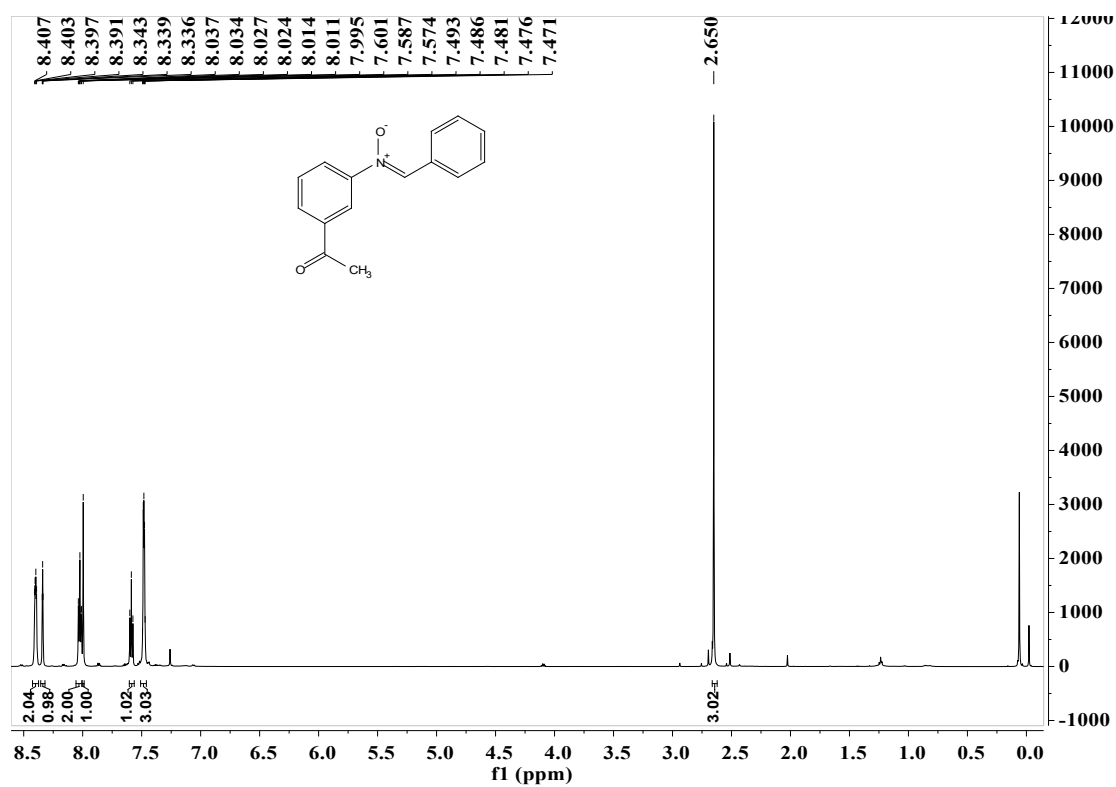

$^{13}\text{C}$  NMR (151 MHz,  $\text{CDCl}_3$ ) of compound **1ab**

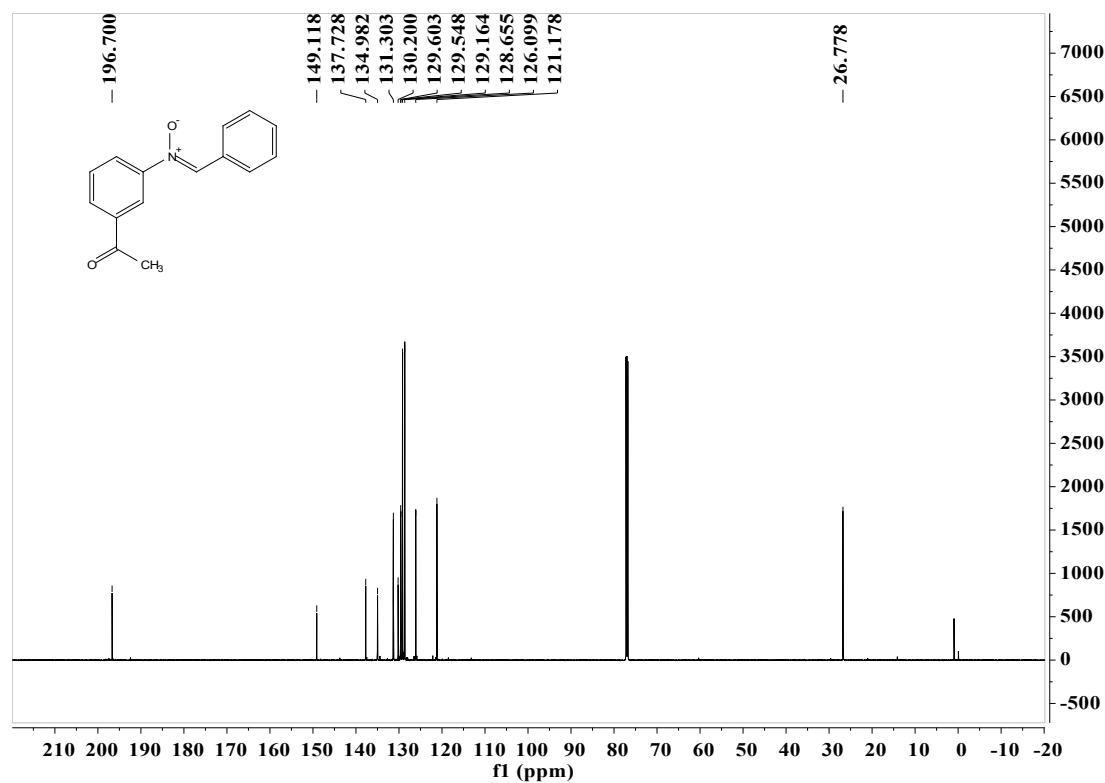





$^1\text{H}$  NMR (600 MHz,  $\text{CDCl}_3$ ) of compound **1ad**

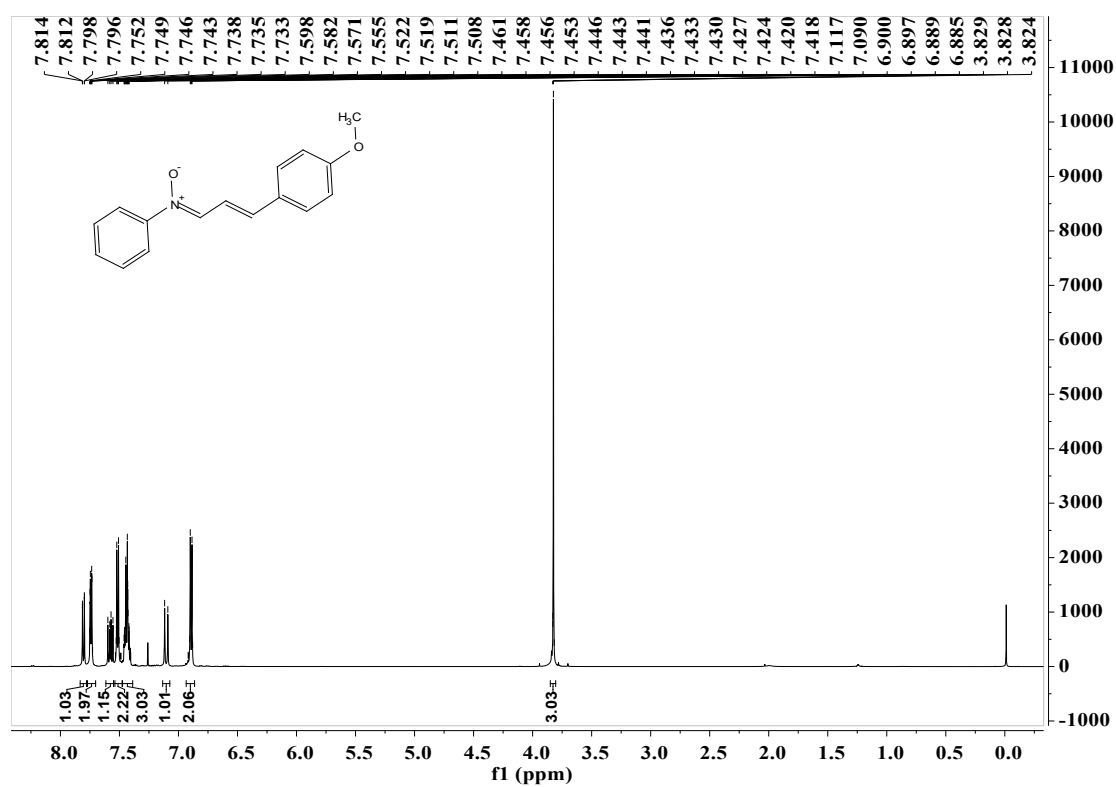

$^{13}\text{C}$  NMR (151 MHz,  $\text{CDCl}_3$ ) of compound **1ad**

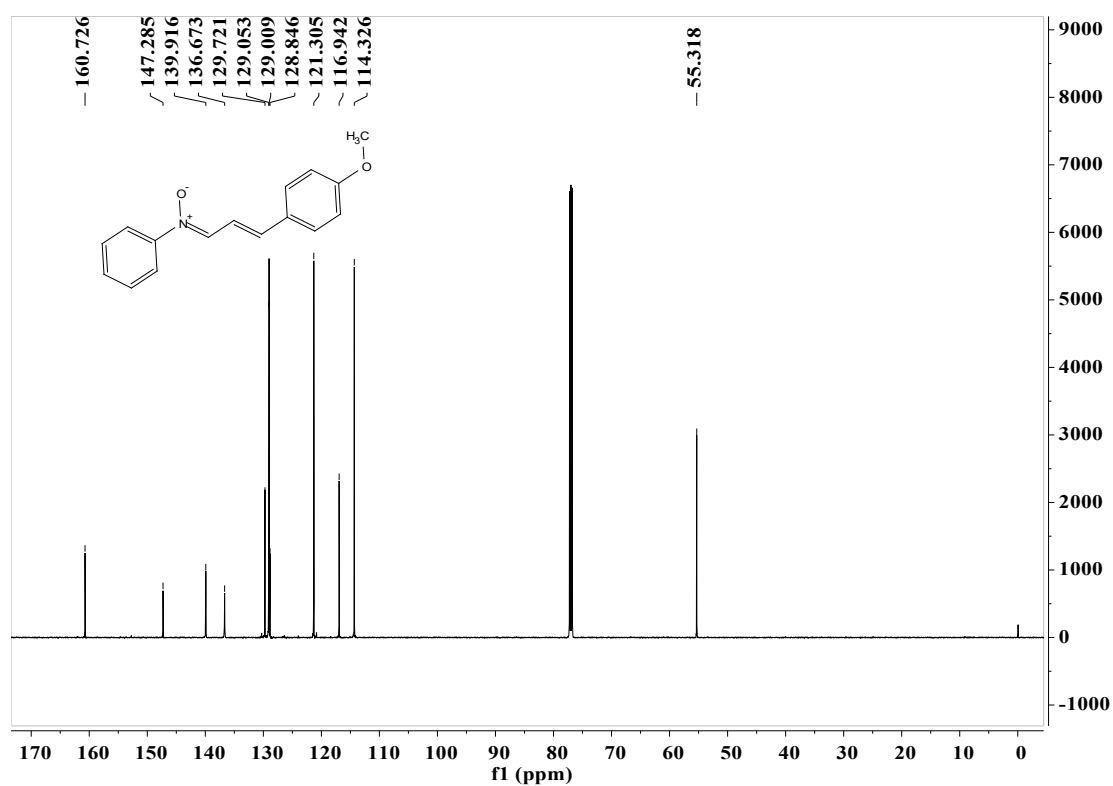

$^1\text{H}$  NMR (600 MHz,  $\text{CDCl}_3$ ) of compound **1ae**

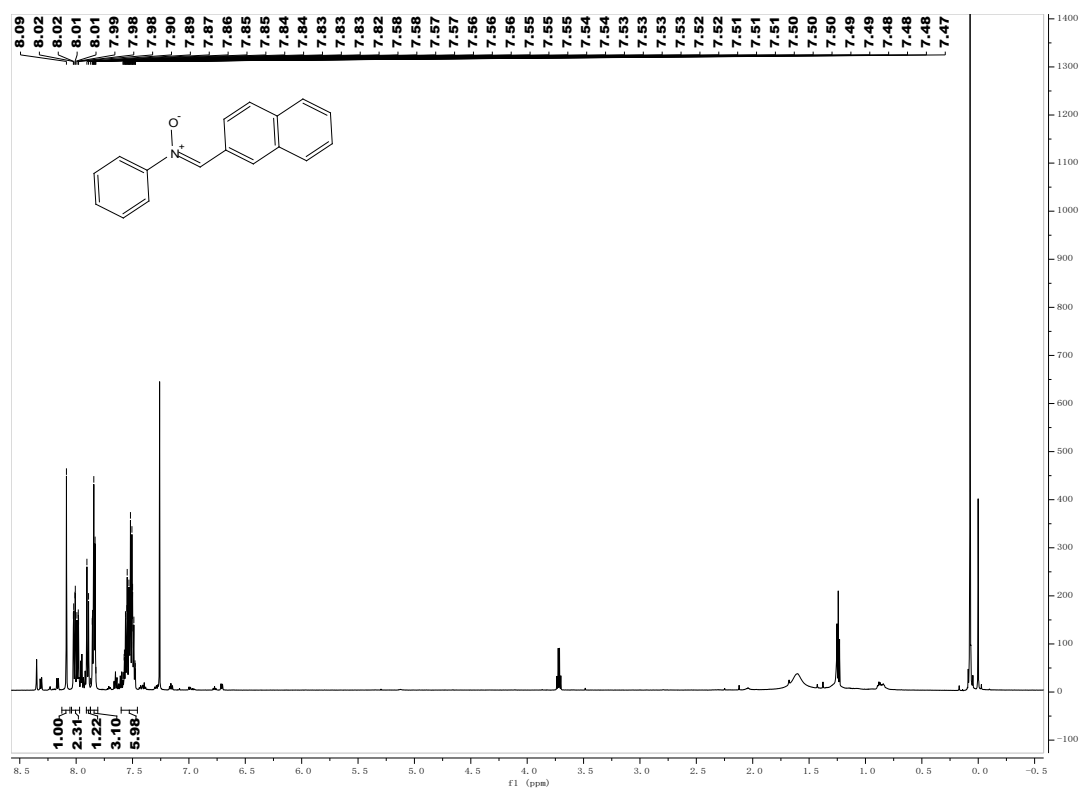

<sup>1</sup>H NMR (600 MHz, CDCl<sub>3</sub>) of compound **1af**

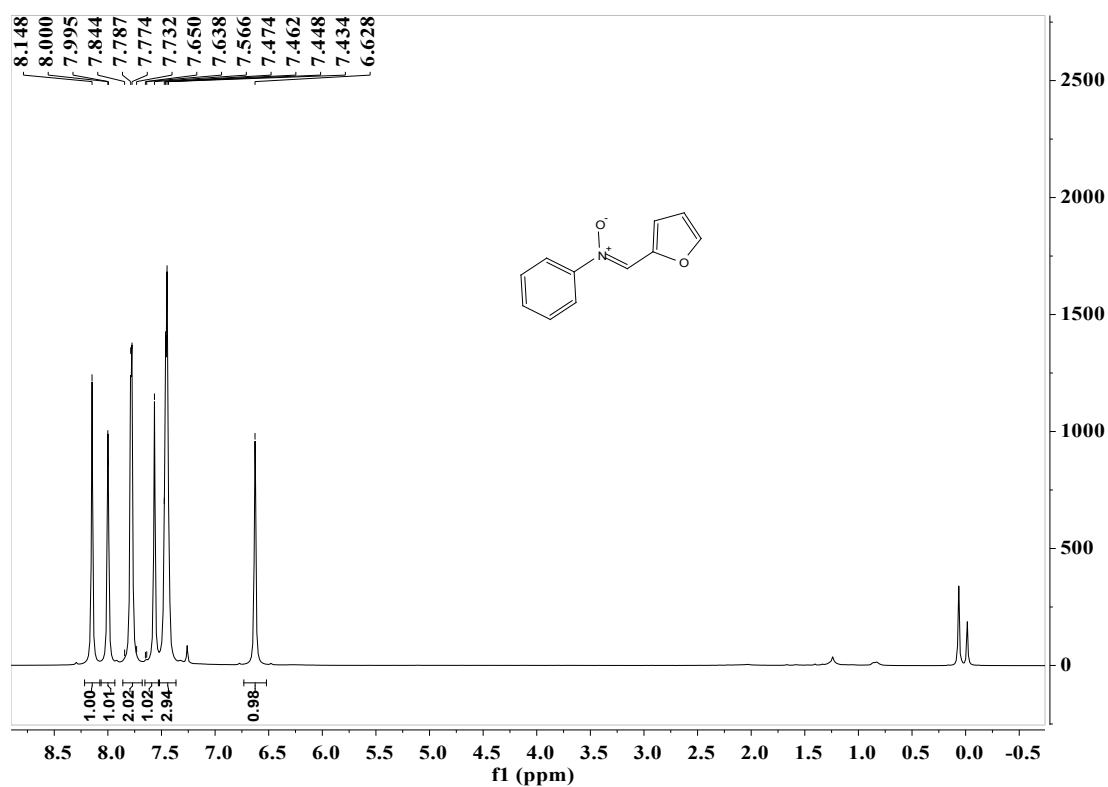

<sup>13</sup>C NMR (151 MHz, CDCl<sub>3</sub>) of compound **1af**

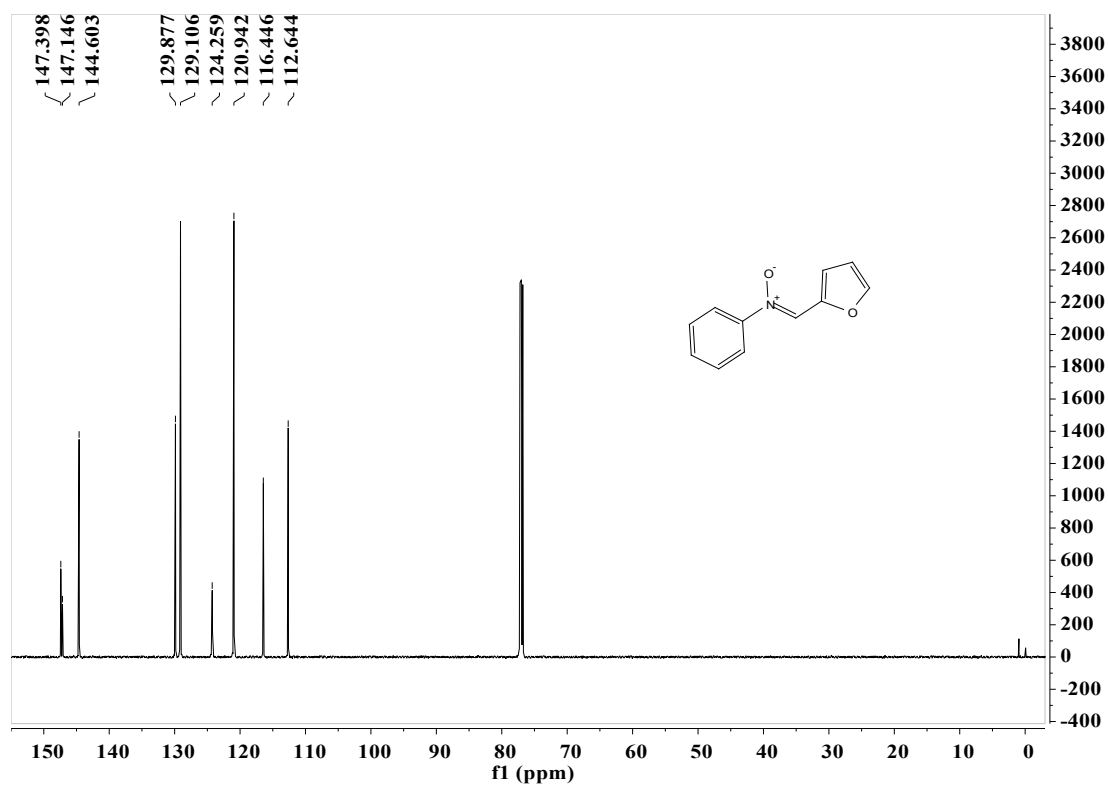

$^1\text{H}$  NMR (600 MHz,  $\text{CDCl}_3$ ) of compound **1ag**

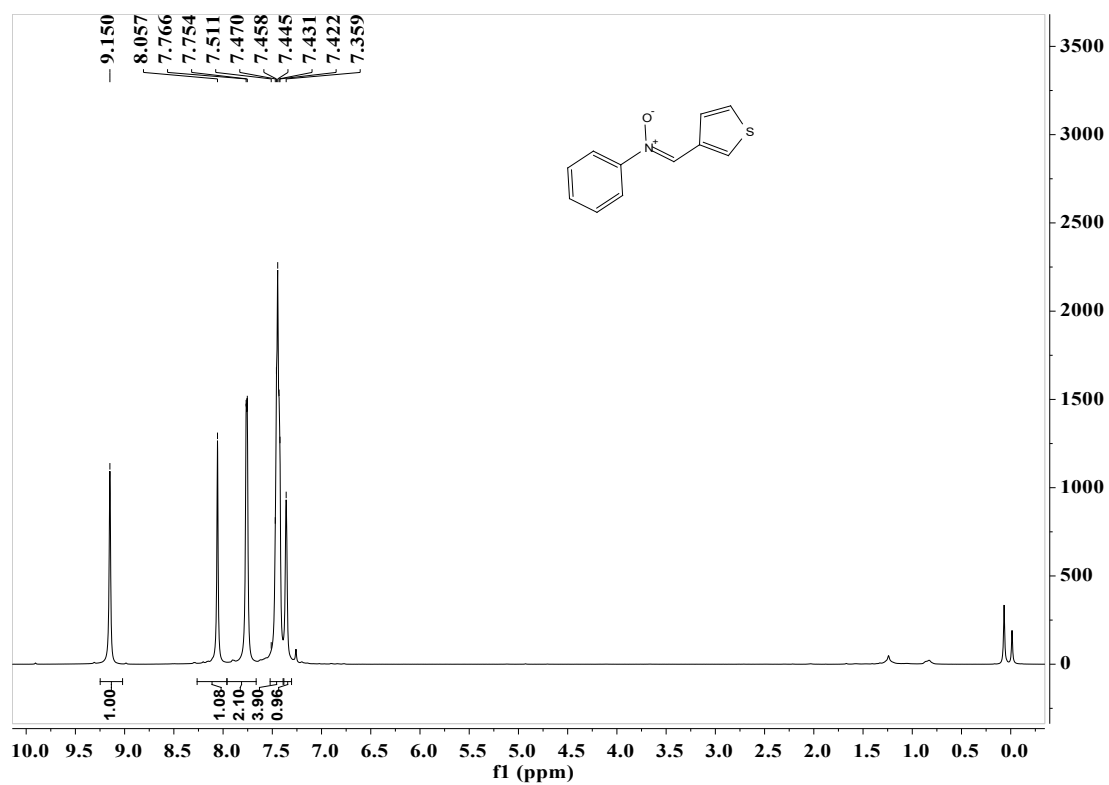

$^{13}\text{C}$  NMR (151 MHz,  $\text{CDCl}_3$ ) of compound **1ag**

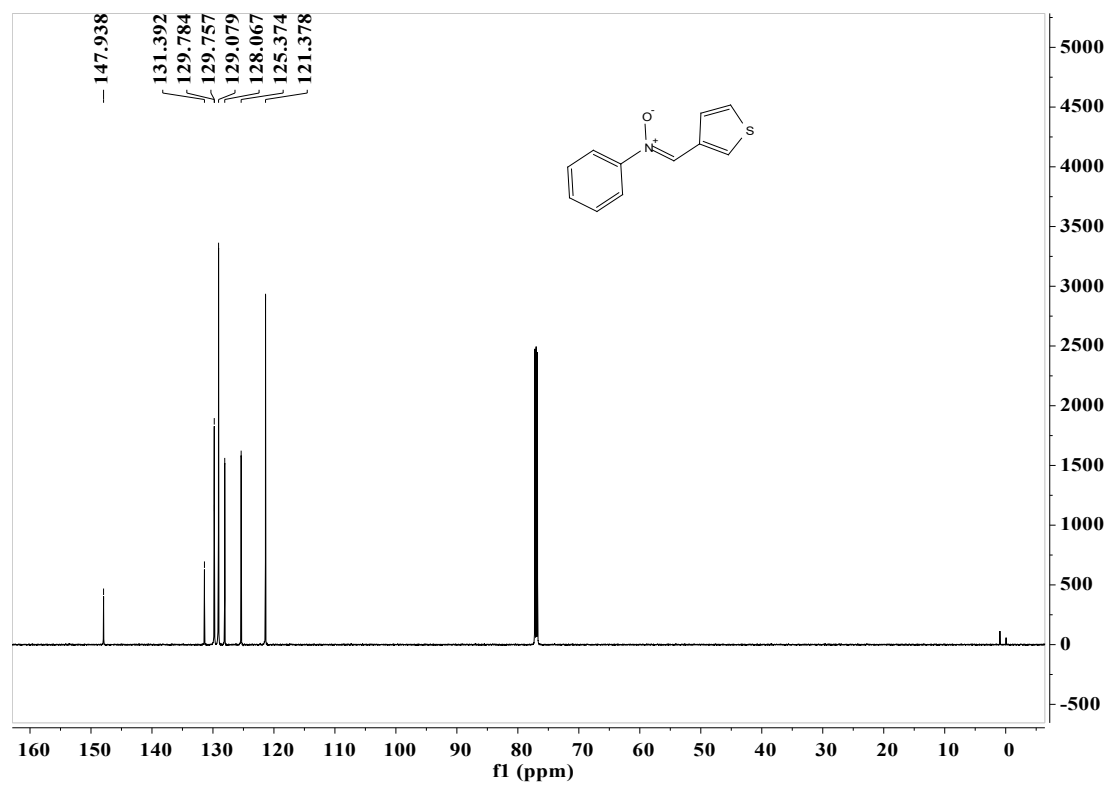

<sup>1</sup>H NMR (600 MHz, CDCl<sub>3</sub>) of compound **3a**

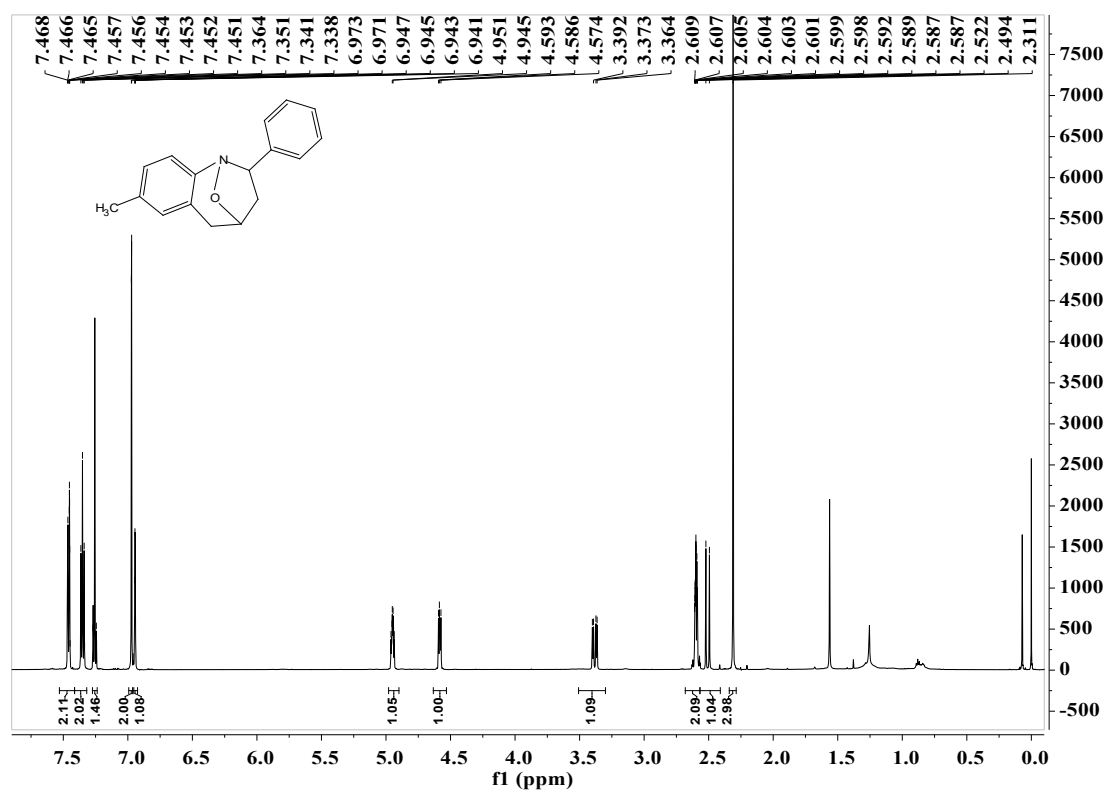

<sup>13</sup>C NMR (151 MHz, CDCl<sub>3</sub>) for compound **3a**

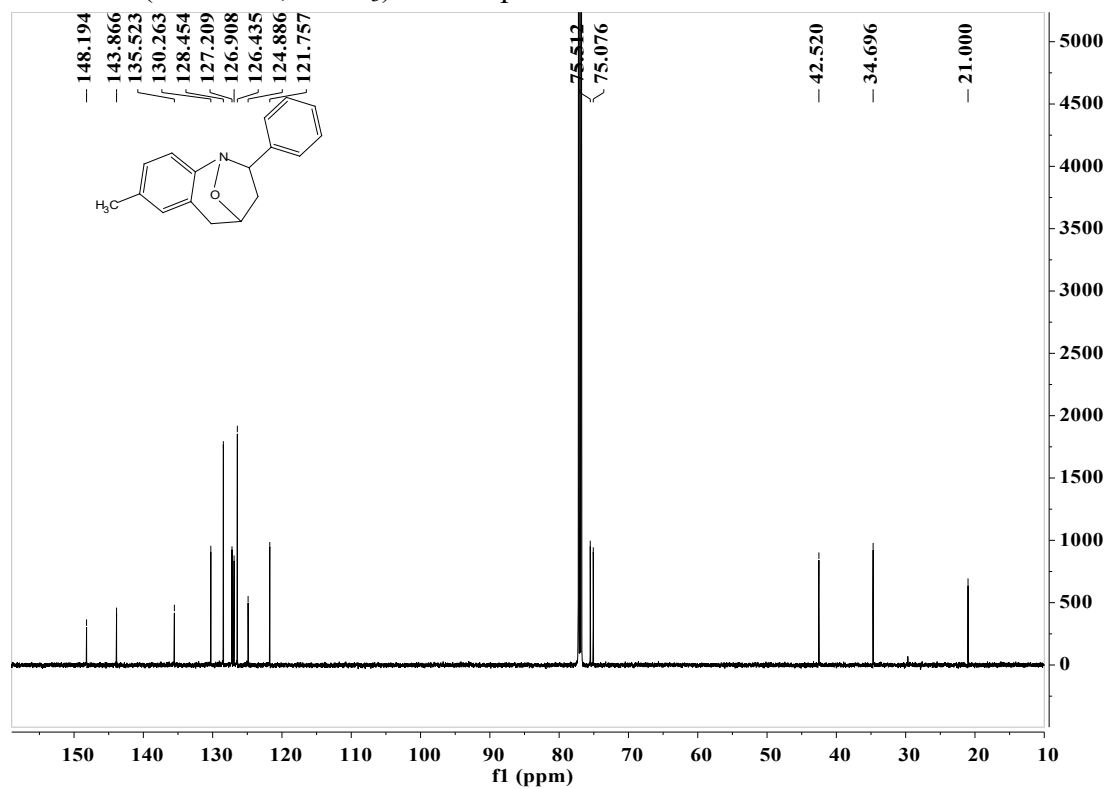

## 2D NOE experiment of compound **3a**

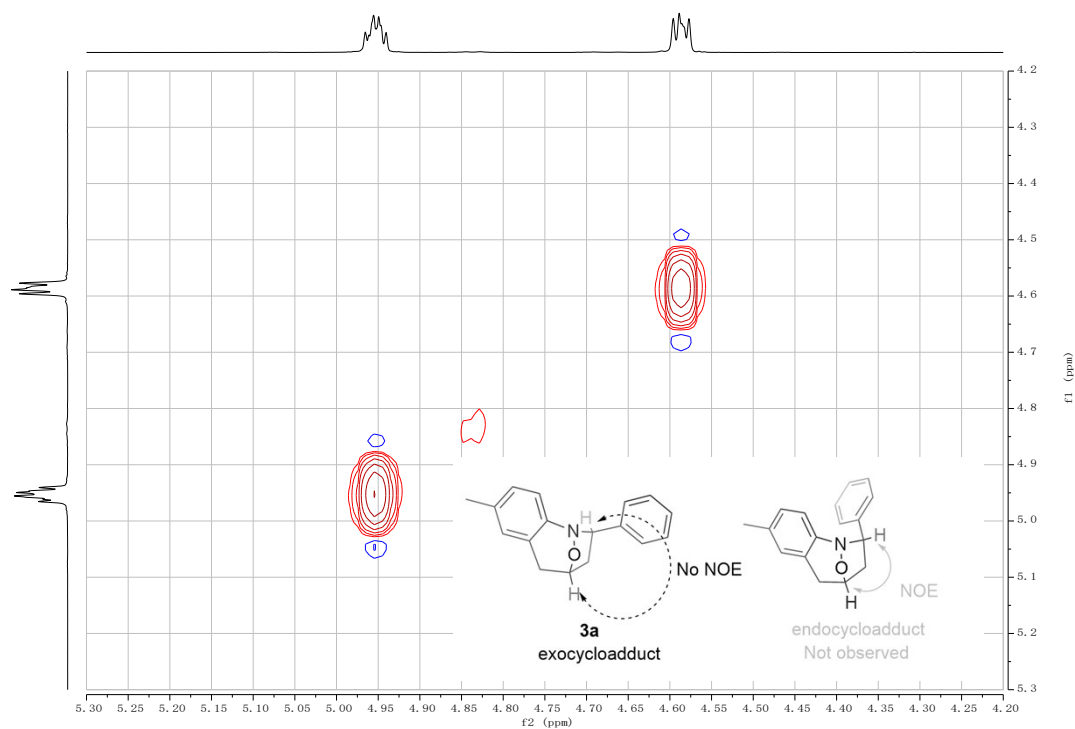

## $^1\text{H}$ NMR (600 MHz, $\text{CDCl}_3$ ) for compound **3b**

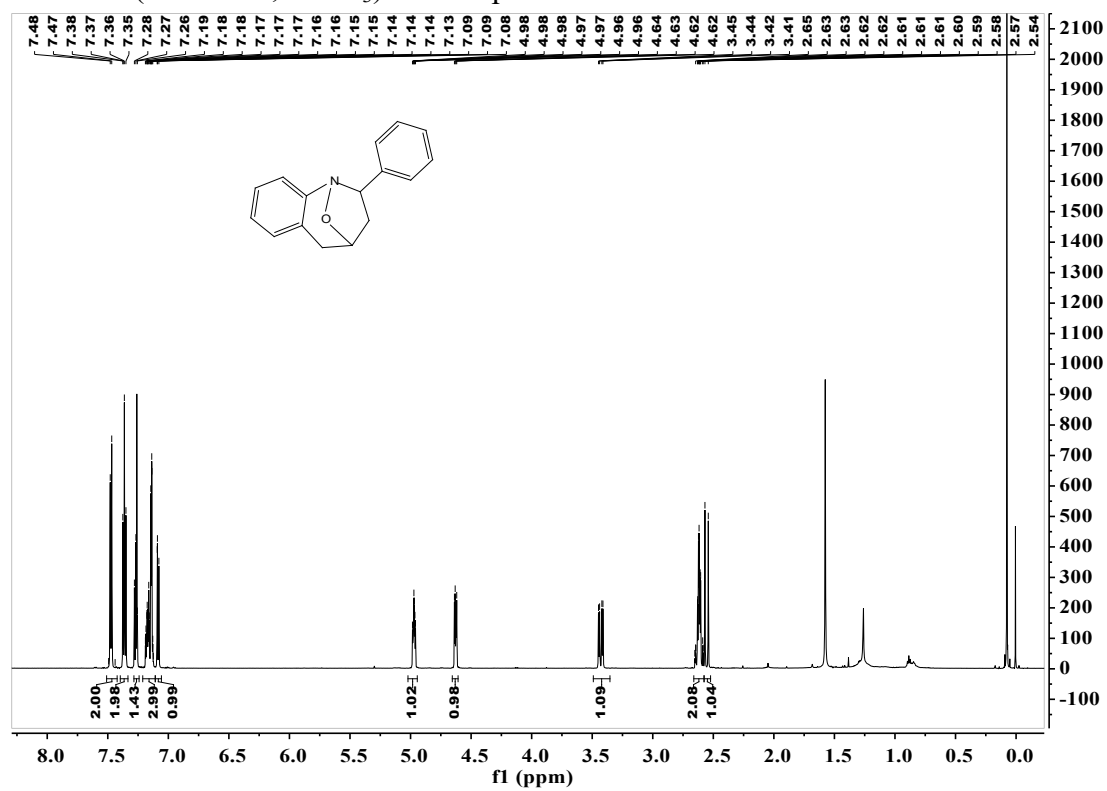

<sup>13</sup>C NMR (151 MHz, CDCl<sub>3</sub>) of compound **3b**

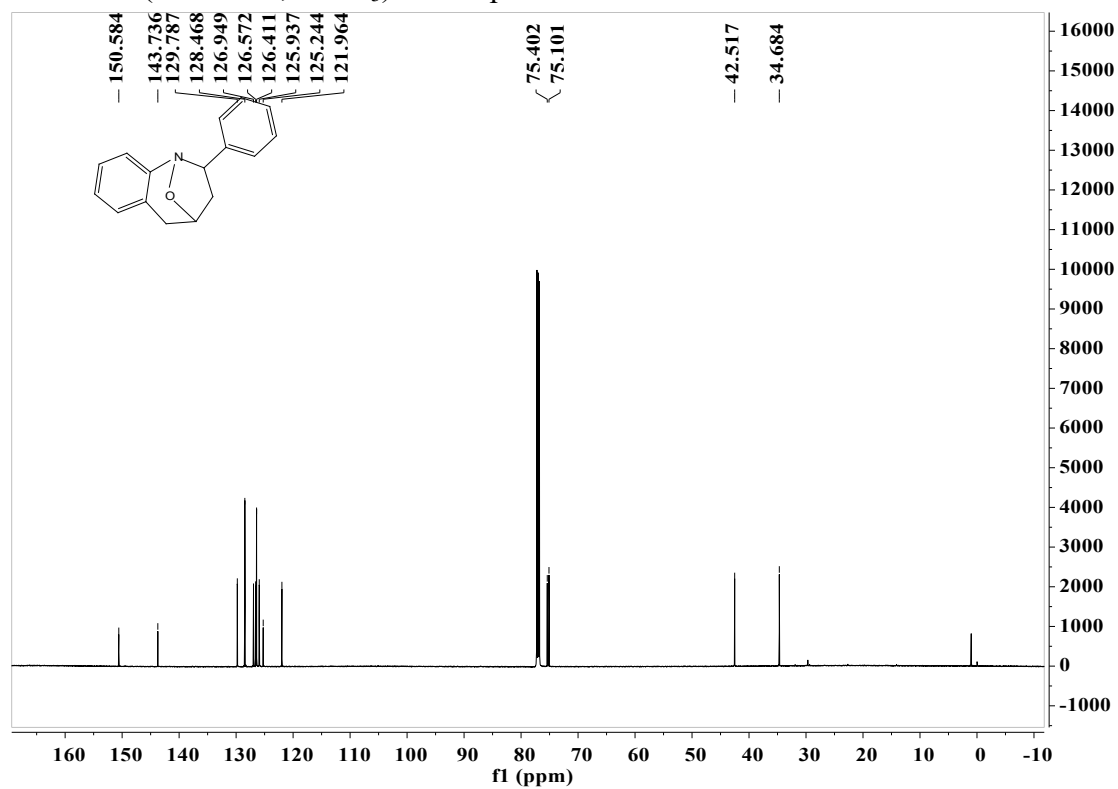

2D NOE experiment of compound **3b**

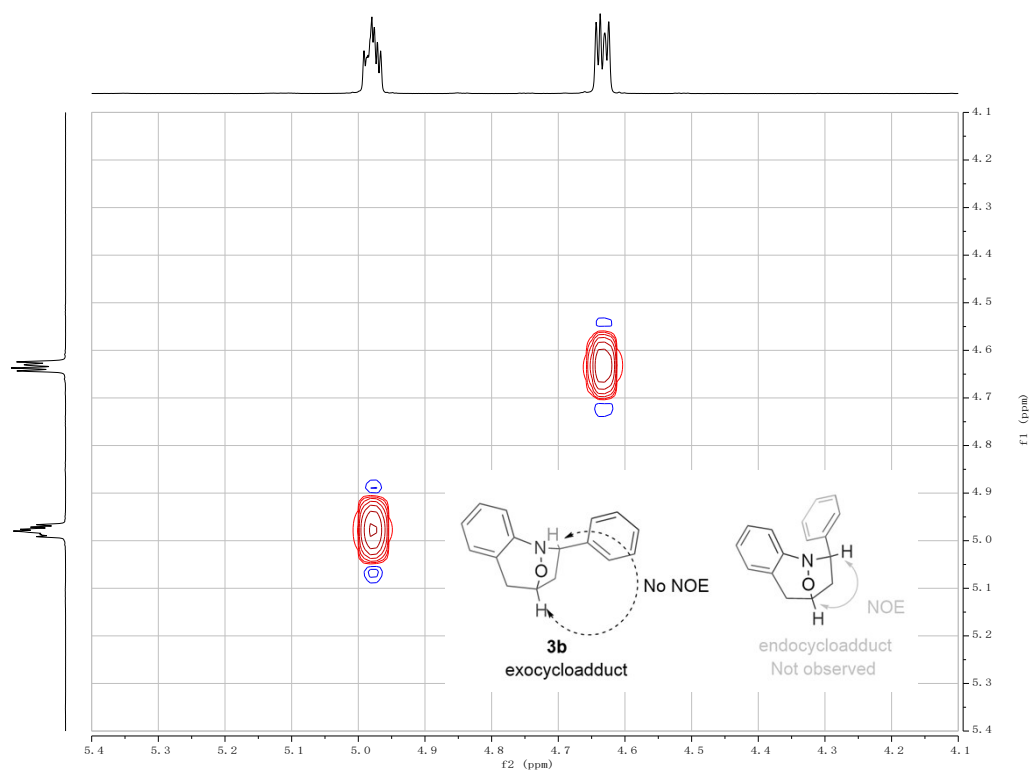



$^1\text{H}$  NMR (600 MHz,  $\text{CDCl}_3$ ) of compound **3c**

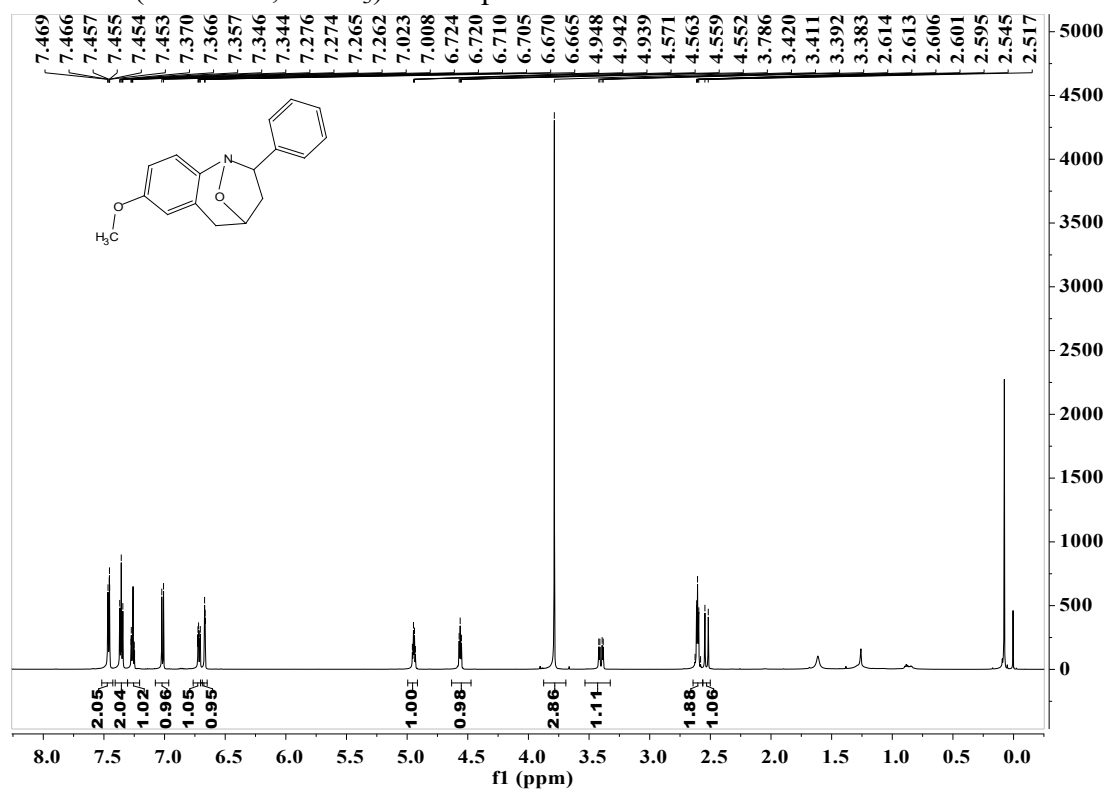

$^{13}\text{C}$  NMR (151 MHz,  $\text{CDCl}_3$ ) of compound **3c**

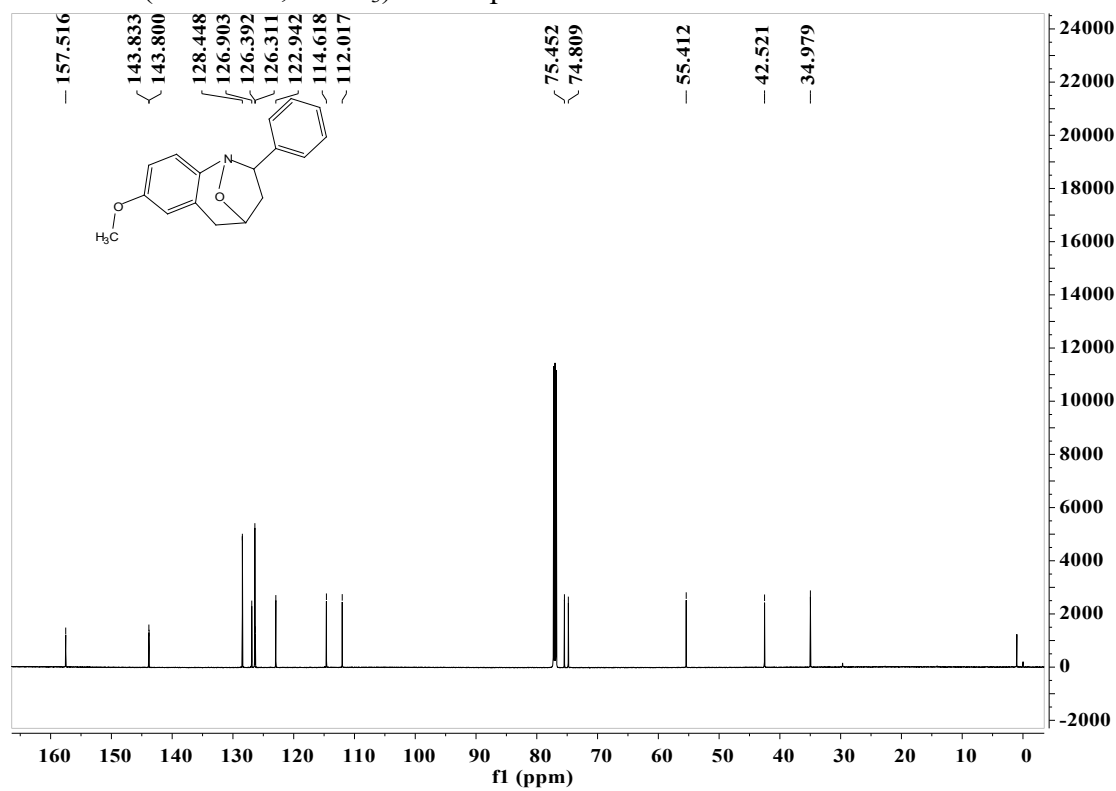

<sup>1</sup>H NMR (600 MHz, CDCl<sub>3</sub>) of compound **3d**

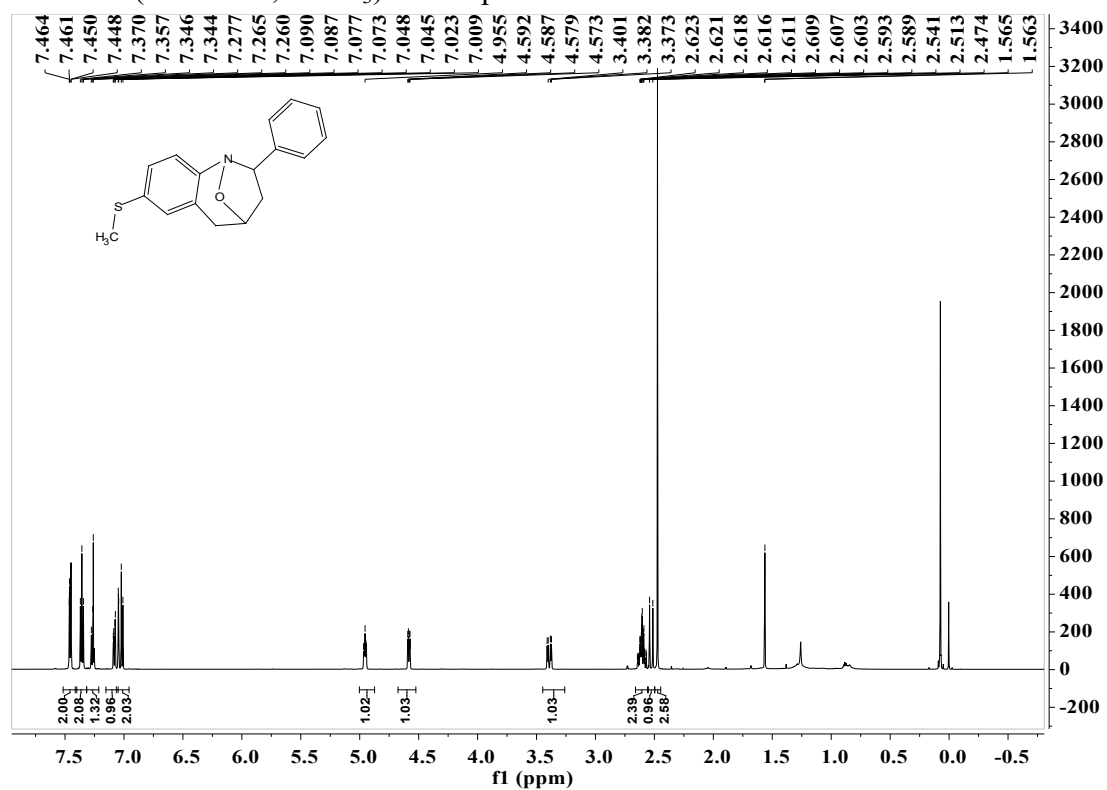

<sup>13</sup>C NMR (151 MHz, CDCl<sub>3</sub>) of compound **3d**

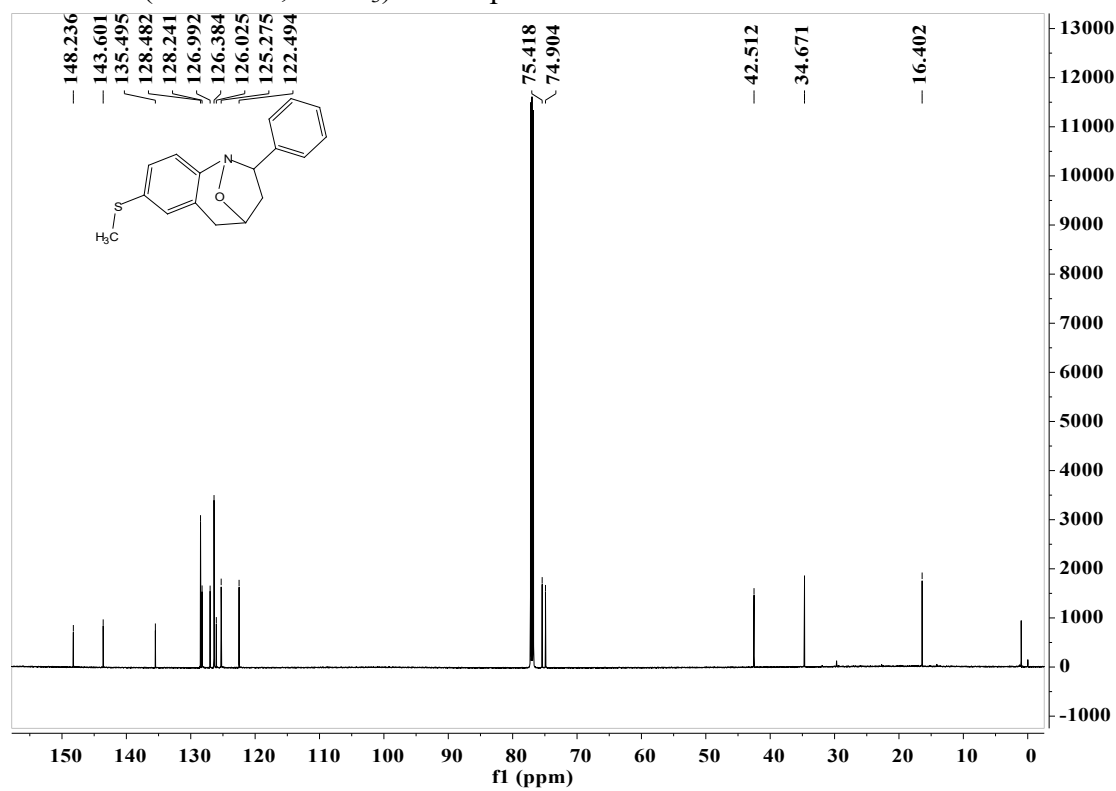

<sup>1</sup>H NMR (600 MHz, CDCl<sub>3</sub>) of compound **3e**

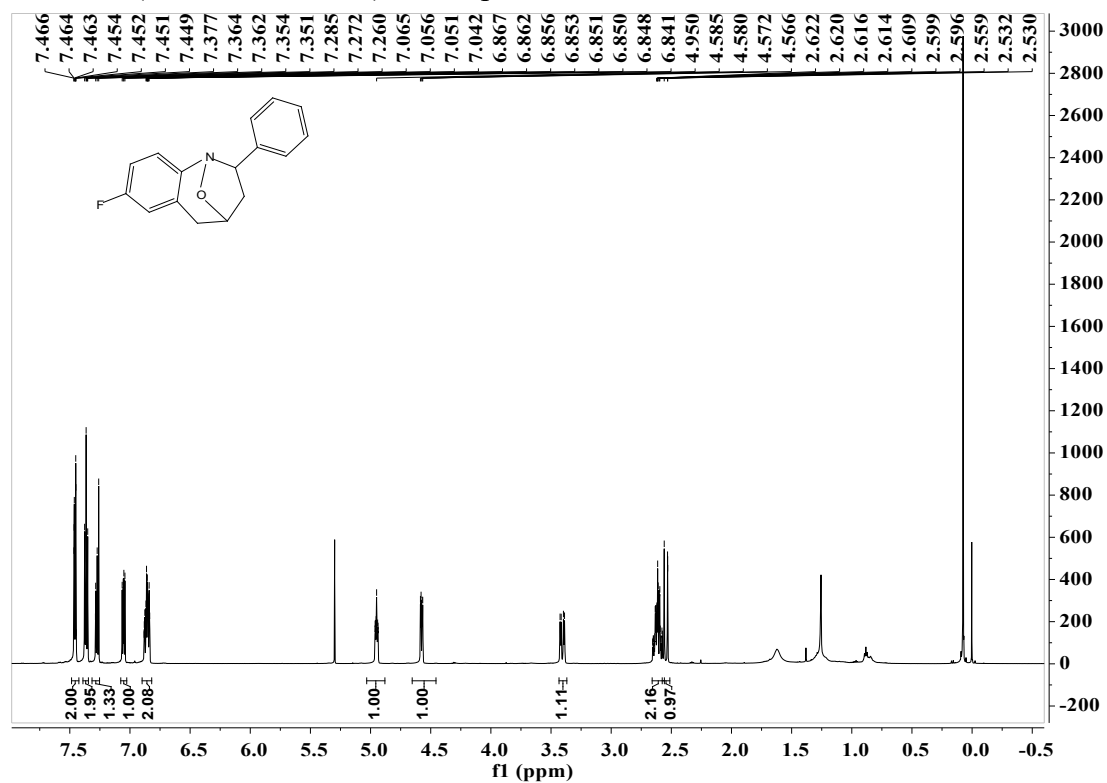

<sup>13</sup>C NMR (151 MHz, CDCl<sub>3</sub>) of compound **3e**

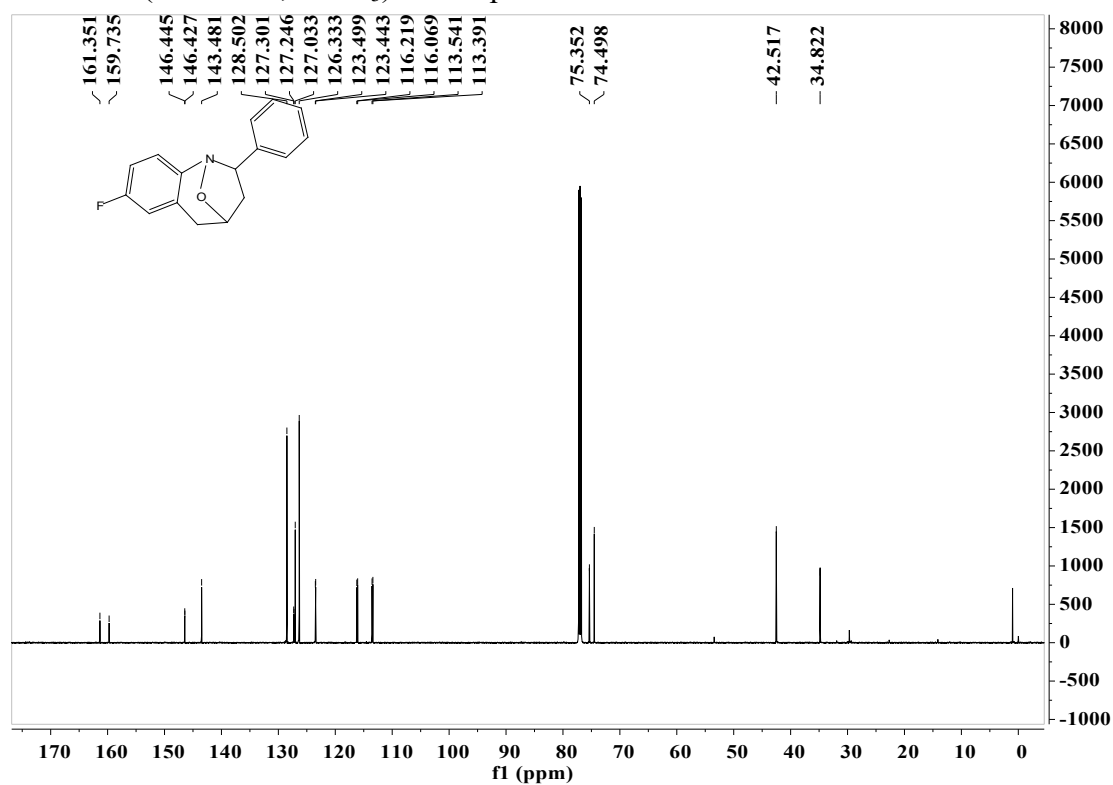

<sup>1</sup>H NMR (600 MHz, CDCl<sub>3</sub>) of compound **3f**

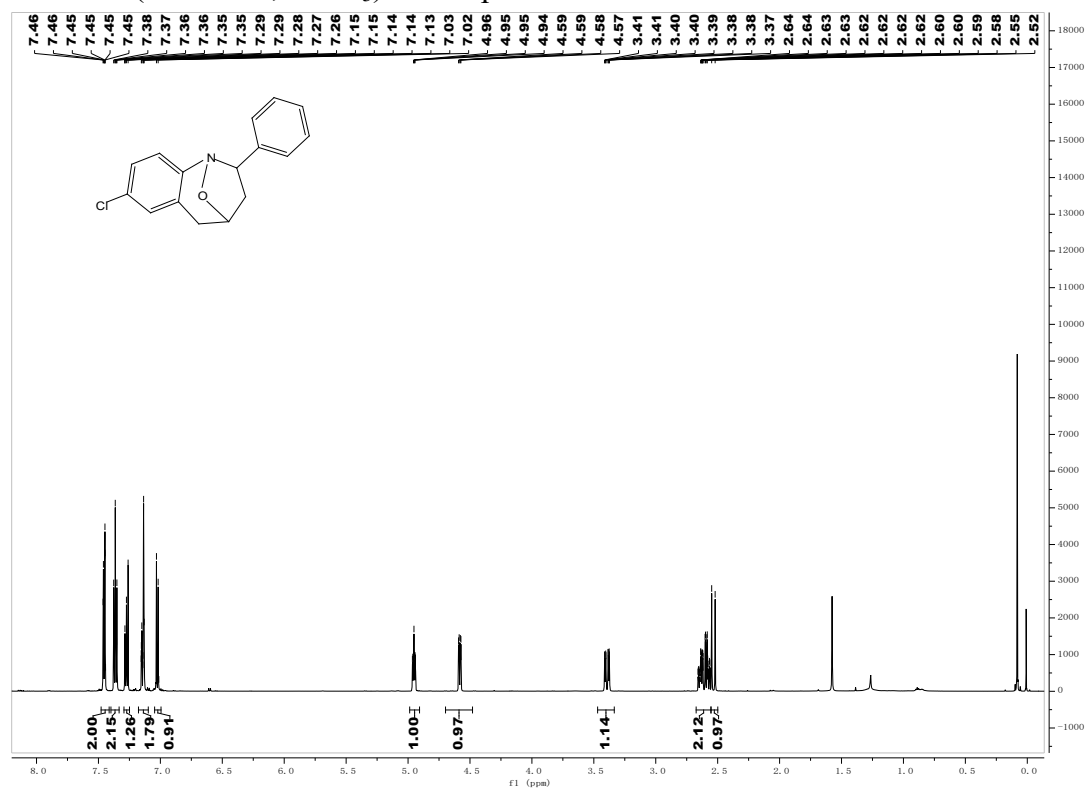

<sup>13</sup>C NMR (151 MHz, CDCl<sub>3</sub>) of compound **3f**

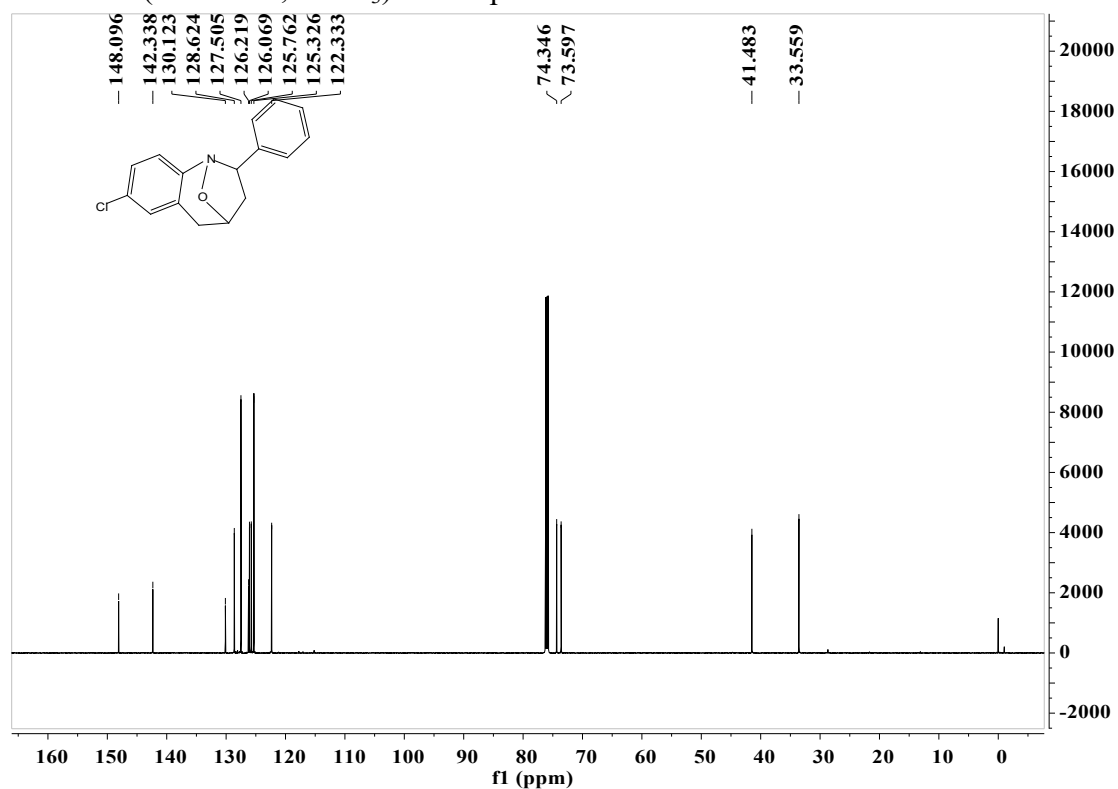

<sup>1</sup>H NMR (600 MHz, CDCl<sub>3</sub>) of compound **3g**

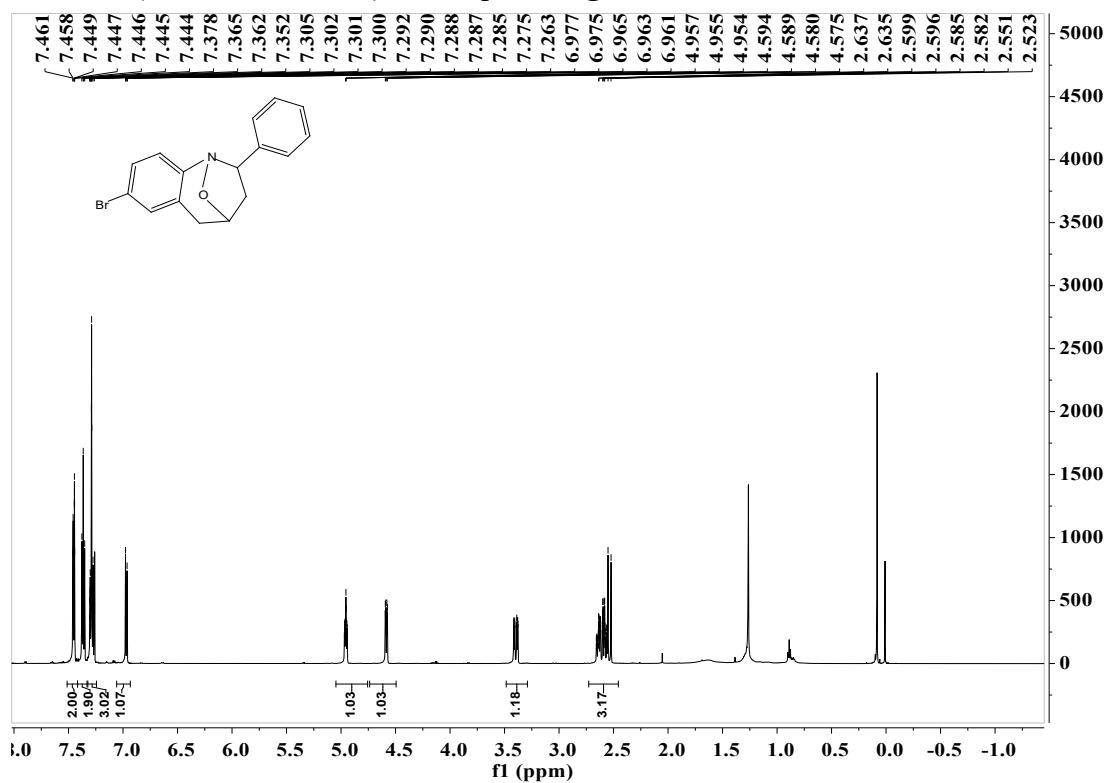

<sup>13</sup>C NMR (151 MHz, CDCl<sub>3</sub>) of compound **3g**

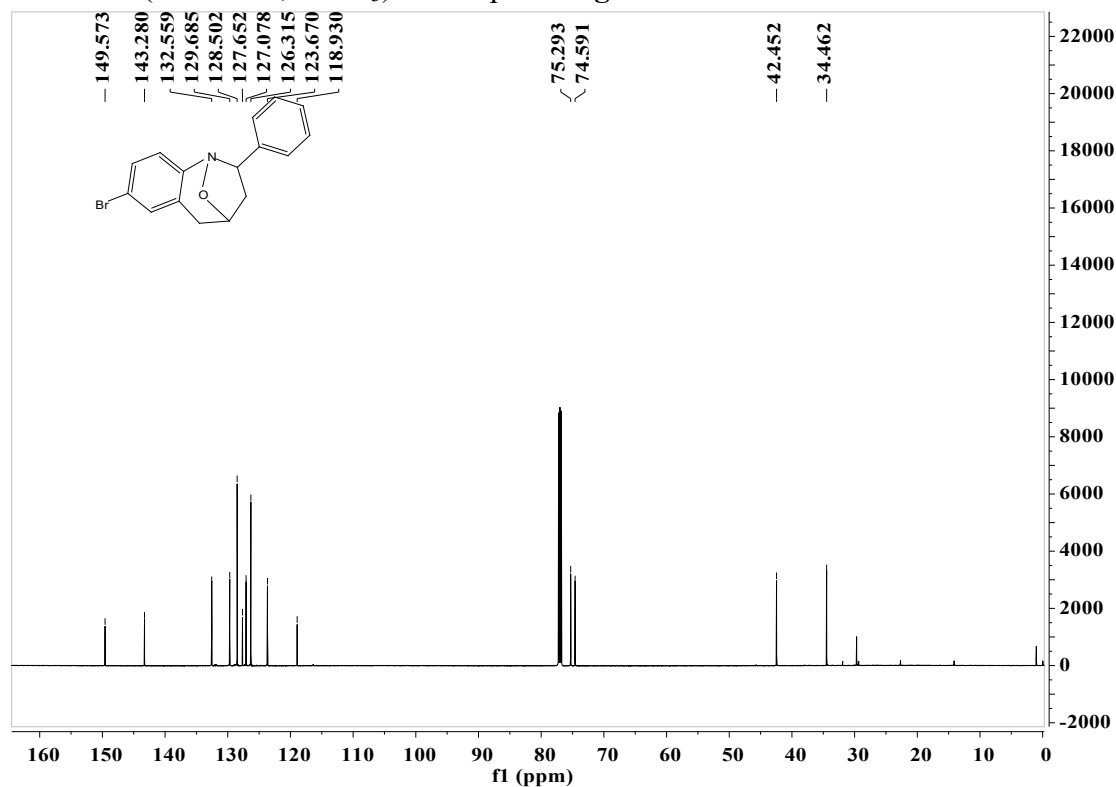

<sup>1</sup>H NMR (600 MHz, CDCl<sub>3</sub>) of compound **3h**

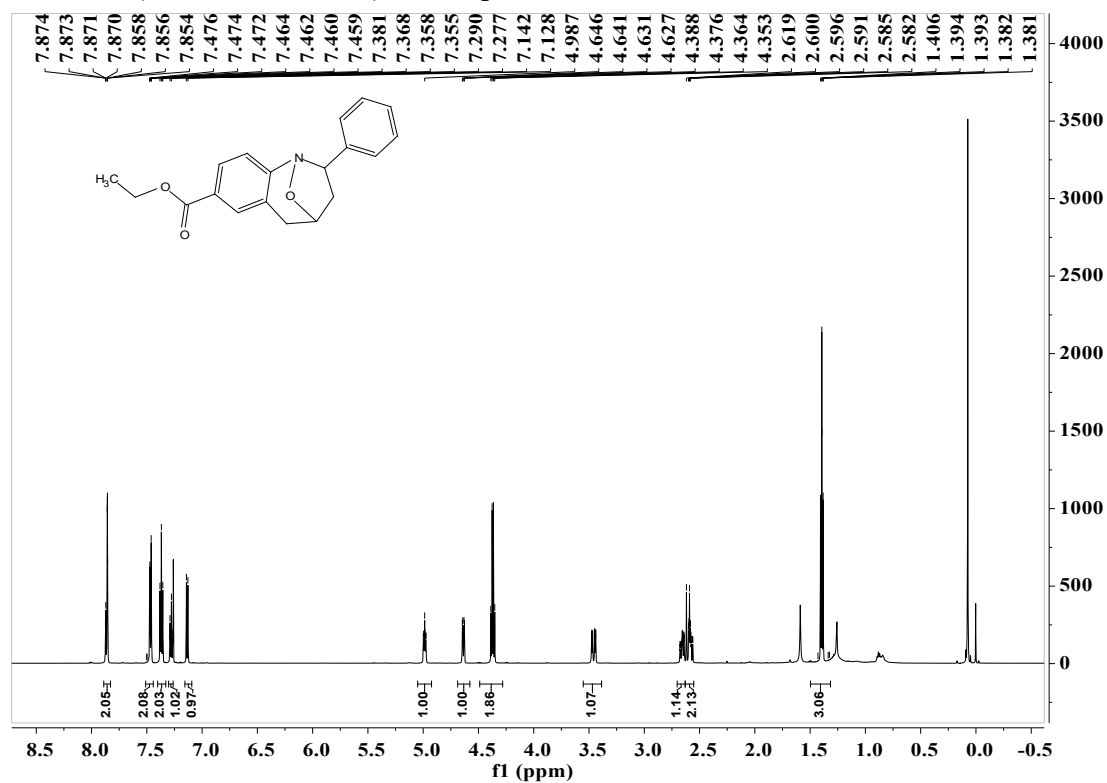

<sup>13</sup>C NMR (151 MHz, CDCl<sub>3</sub>) of compound **3h**

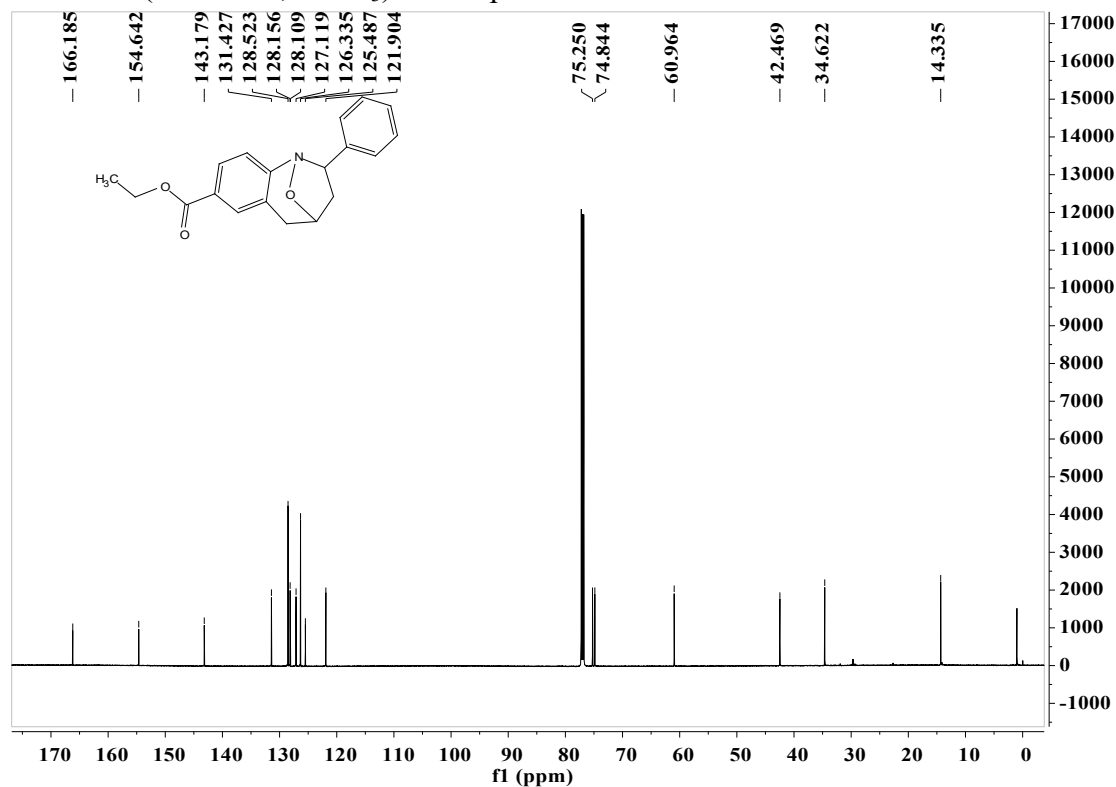

<sup>1</sup>H NMR (600 MHz, CDCl<sub>3</sub>) of compound **3i**

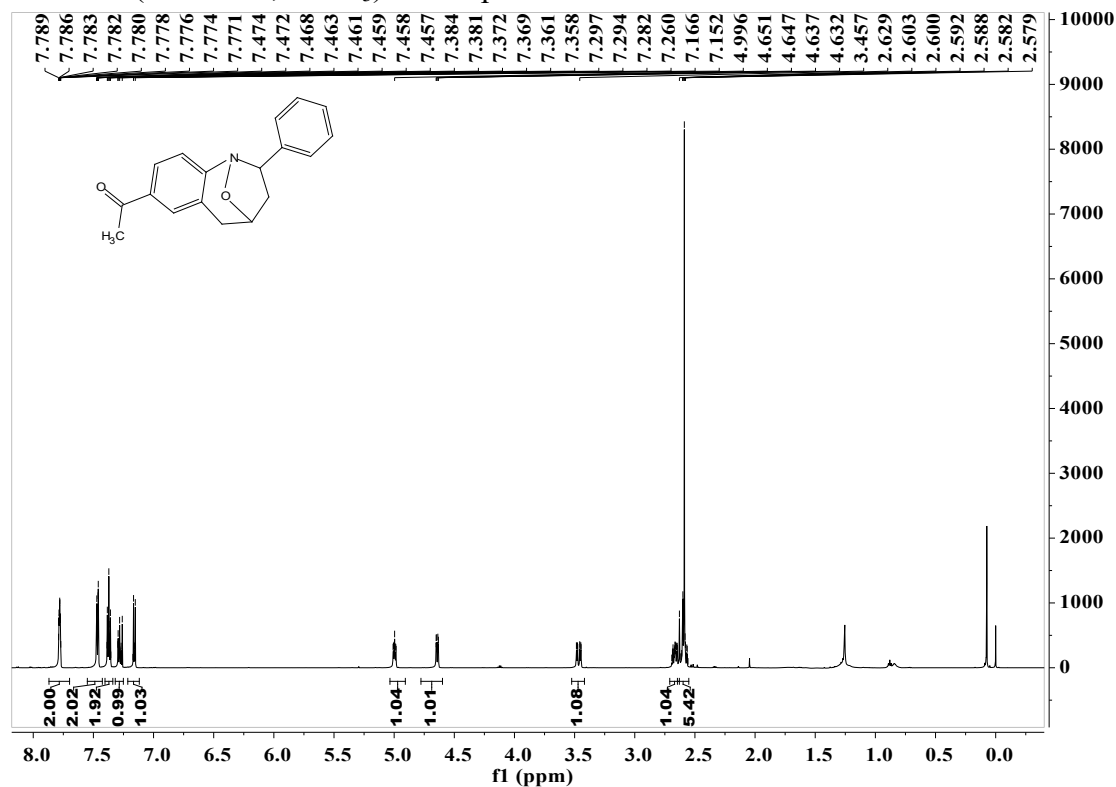

<sup>13</sup>C NMR (151 MHz, CDCl<sub>3</sub>) of compound **3i**

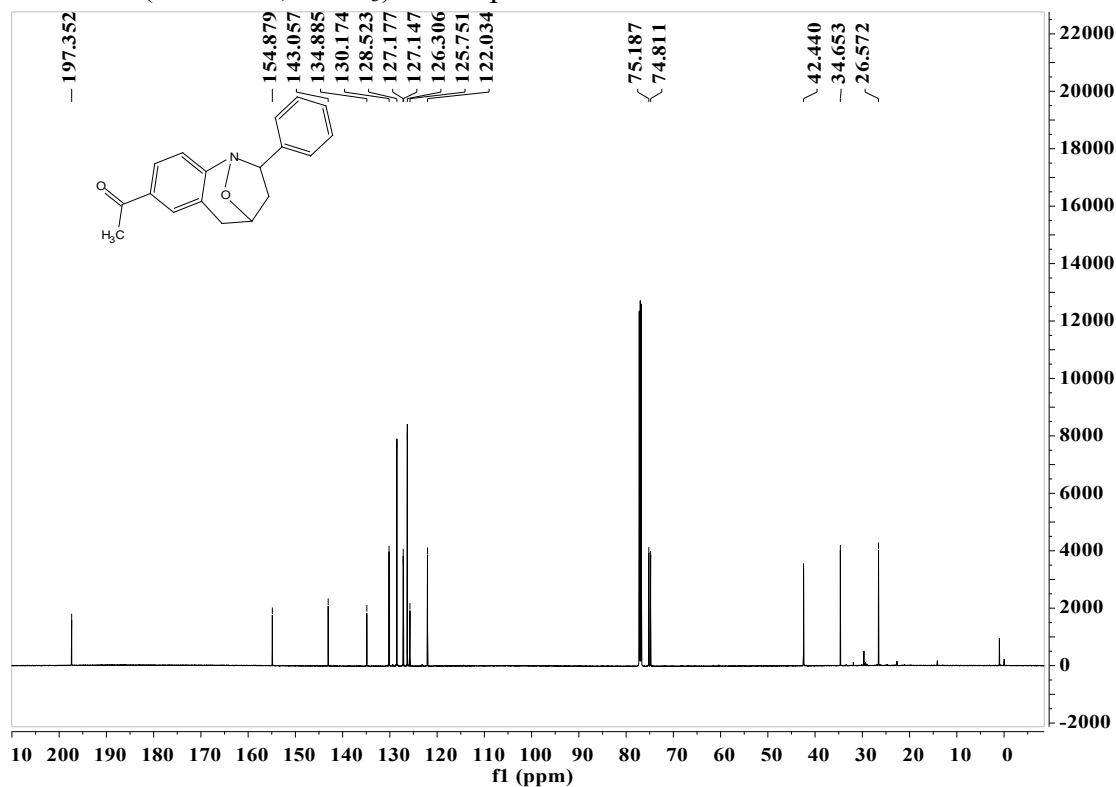

$^1\text{H}$  NMR (600 MHz,  $\text{CDCl}_3$ ) of compound **3j**

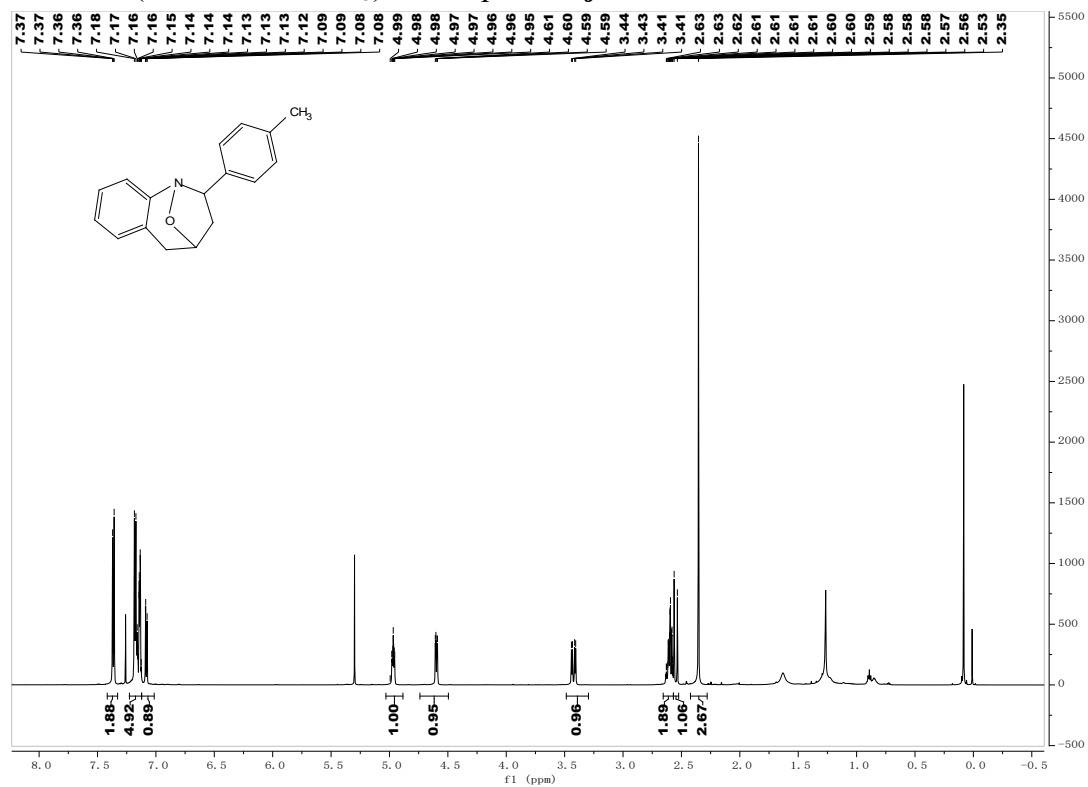

$^{13}\text{C}$  NMR (151 MHz,  $\text{CDCl}_3$ ) of compound **3j**

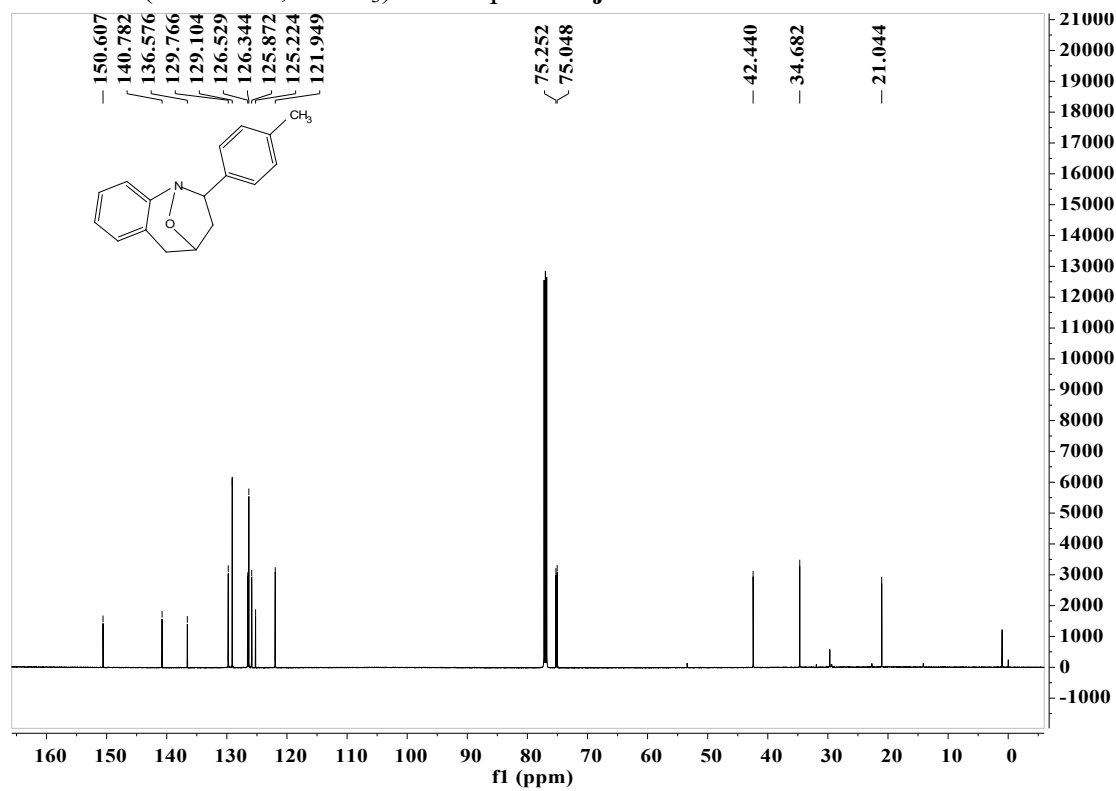



<sup>1</sup>H NMR (600 MHz, CDCl<sub>3</sub>) of compound **3k**

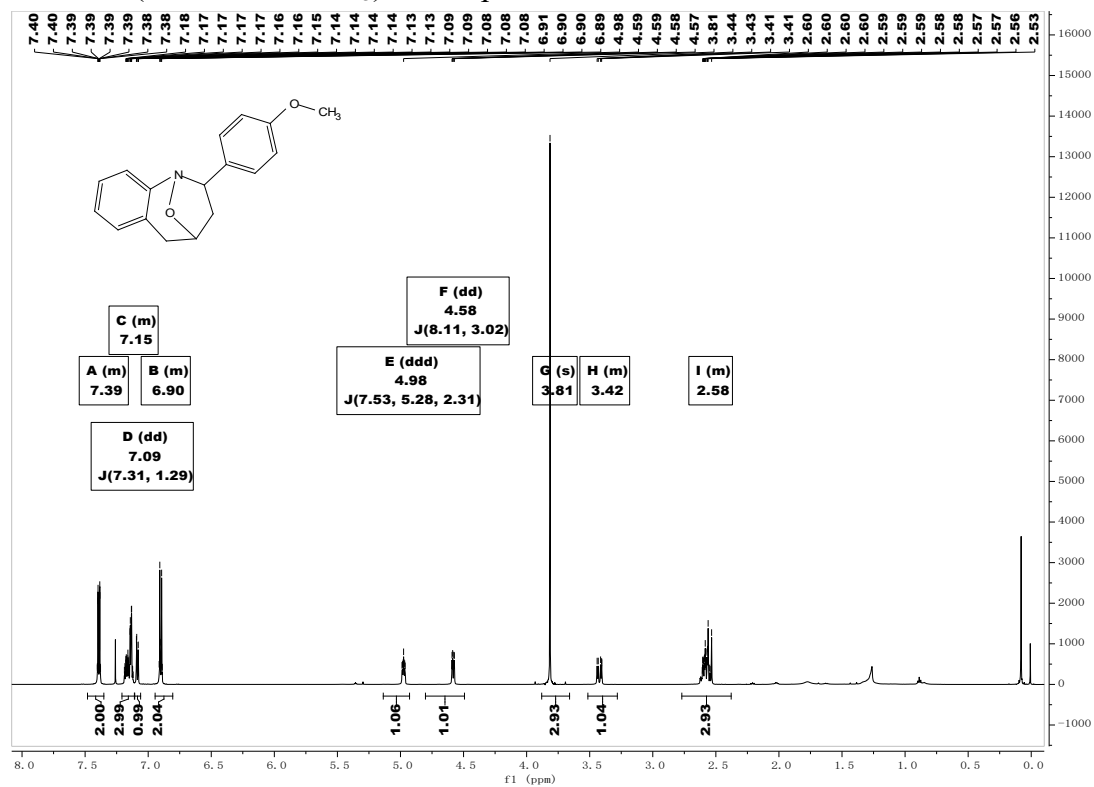

<sup>13</sup>C NMR (151 MHz, CDCl<sub>3</sub>) of compound **3k**

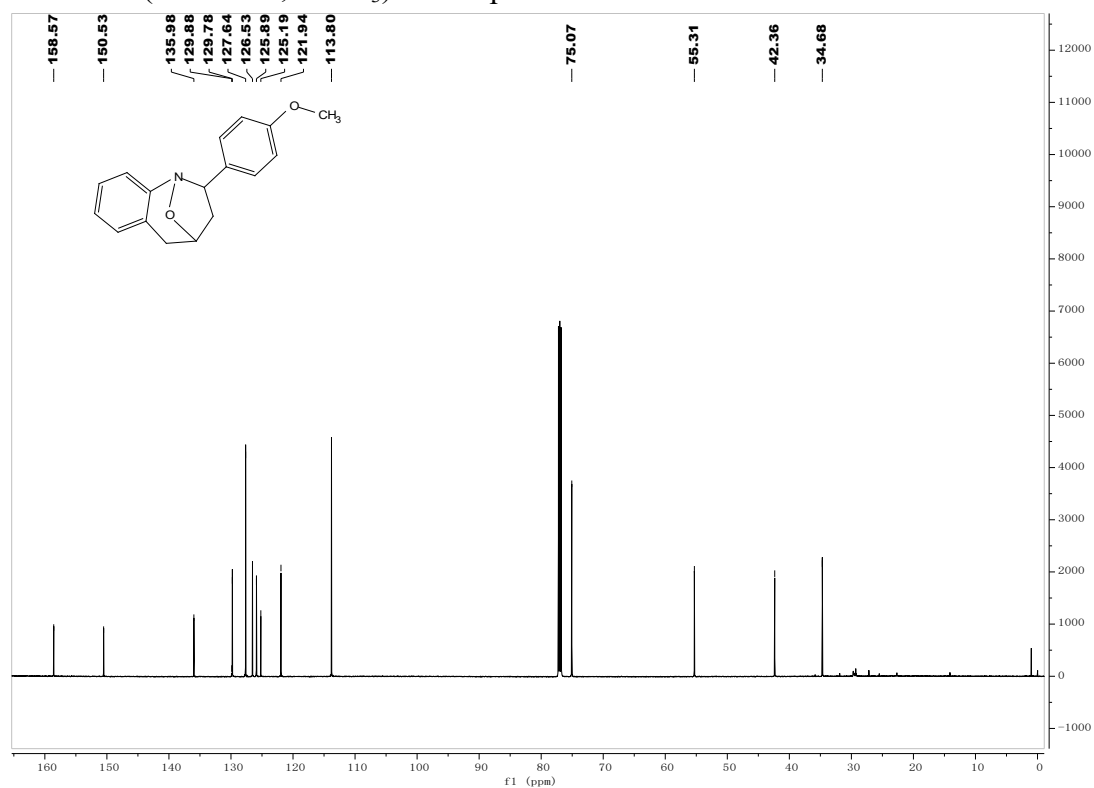

$^1\text{H}$  NMR (600 MHz,  $\text{CDCl}_3$ ) of compound **31**

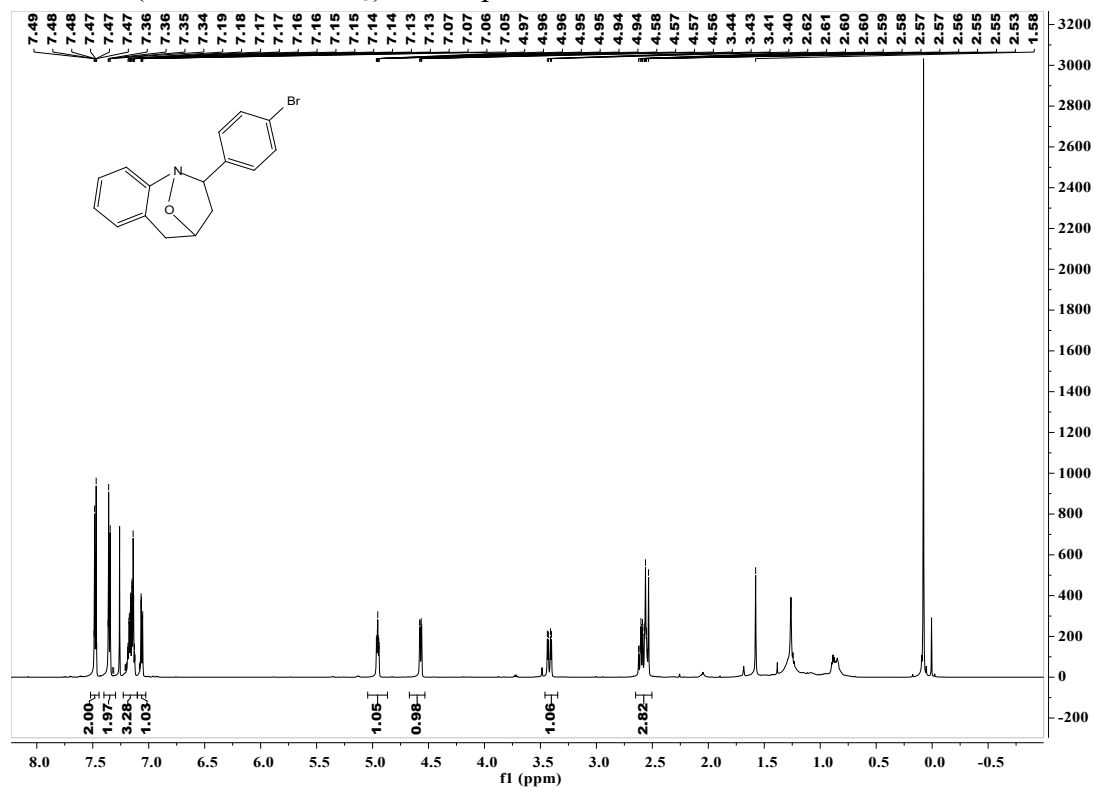

$^{13}\text{C}$  NMR (151 MHz,  $\text{CDCl}_3$ ) of compound **31**

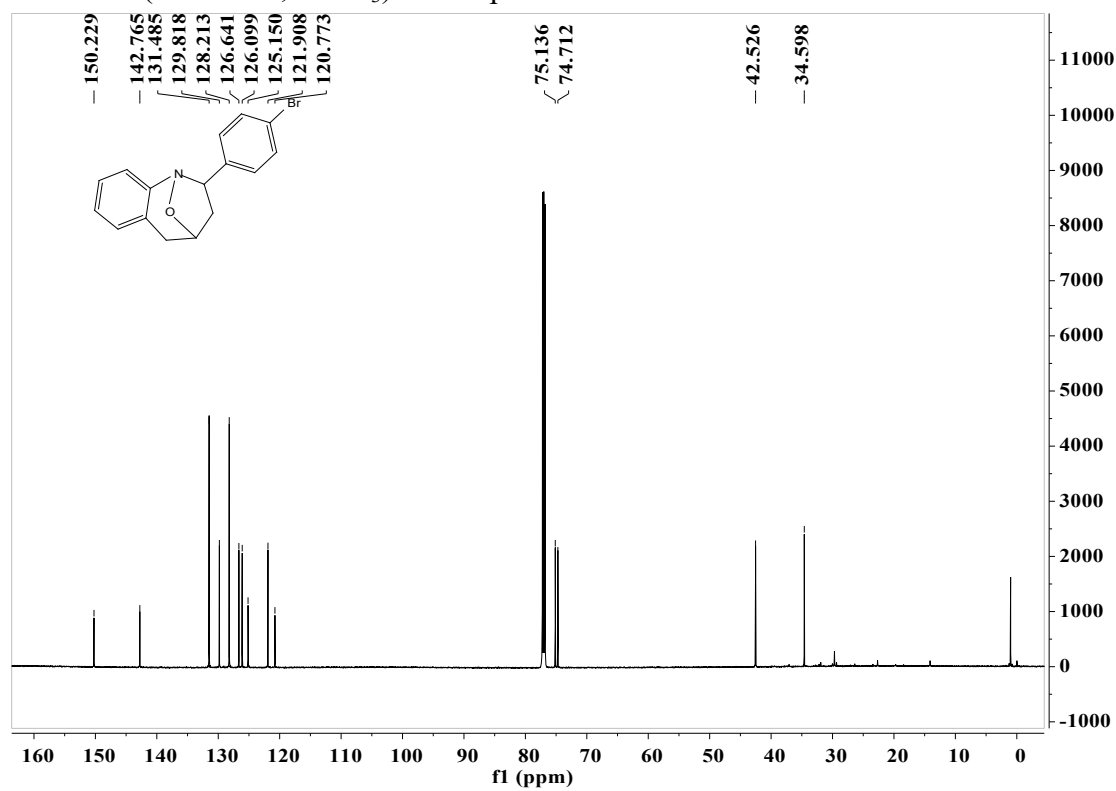

$^1\text{H}$  NMR (600 MHz,  $\text{CDCl}_3$ ) of compound **3m**

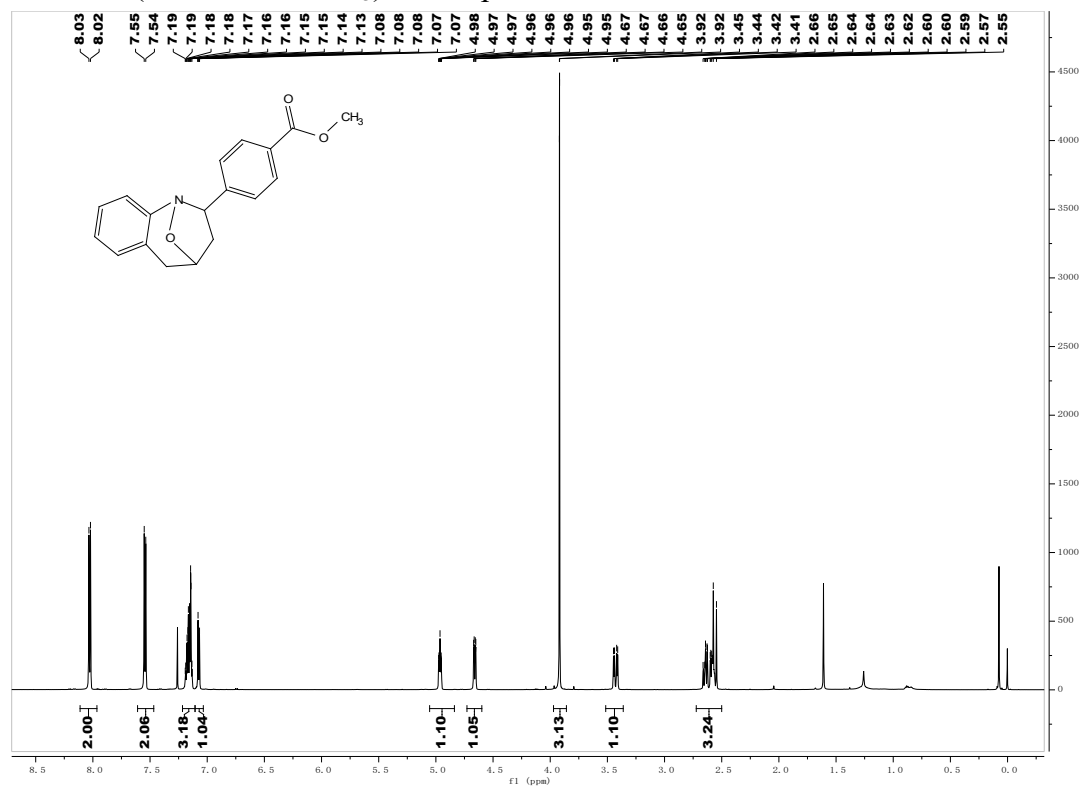

$^{13}\text{C}$  NMR (151 MHz,  $\text{CDCl}_3$ ) of compound **3m**

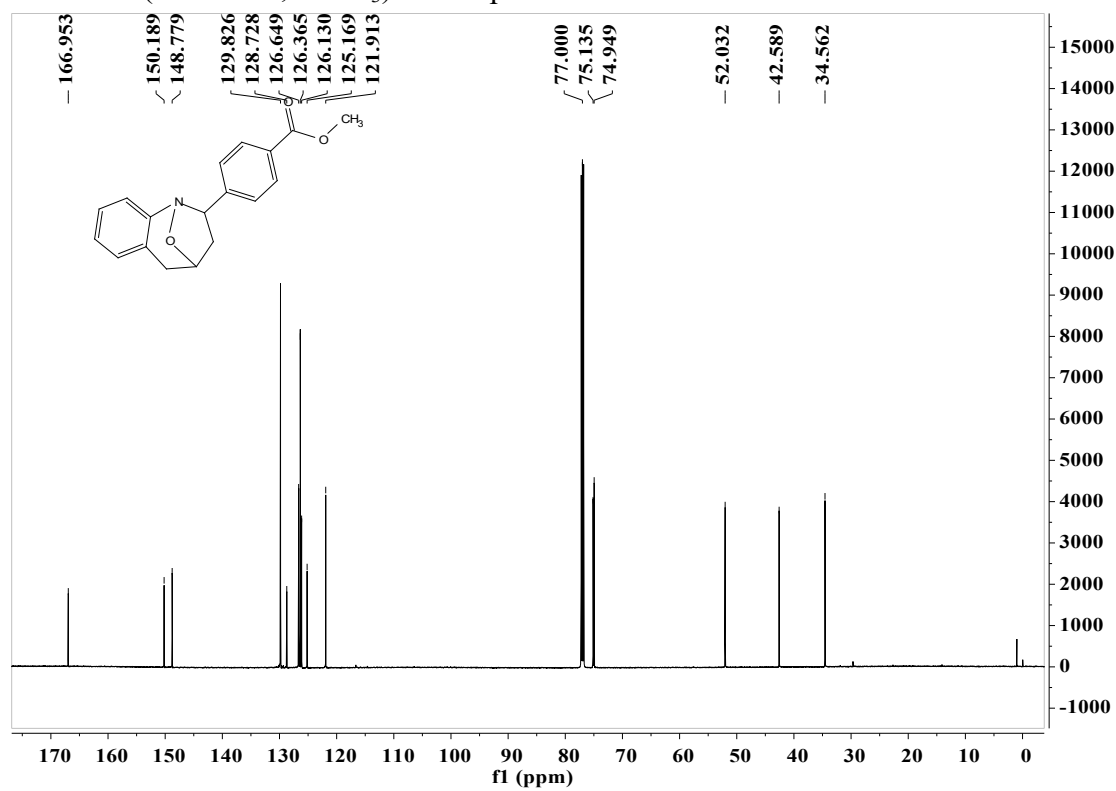

$^1\text{H}$  NMR (600 MHz,  $\text{CDCl}_3$ ) of compound **3n**

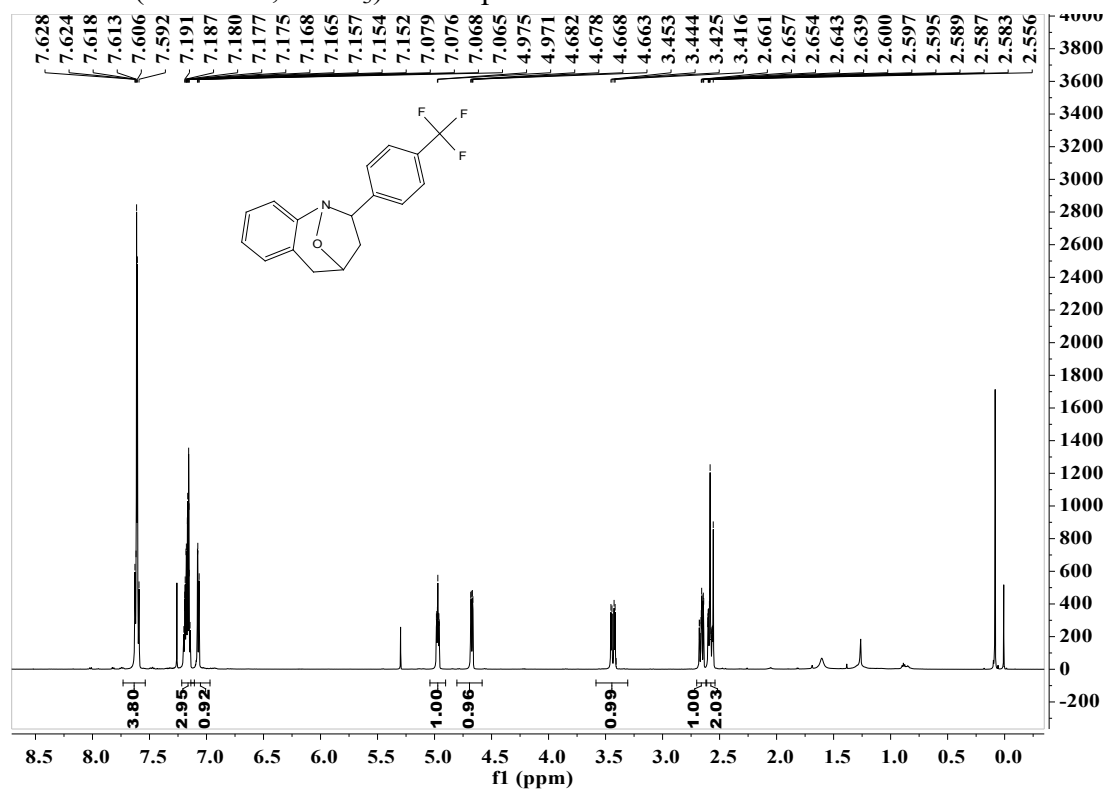

$^{13}\text{C}$  NMR (151 MHz,  $\text{CDCl}_3$ ) of compound **3n**

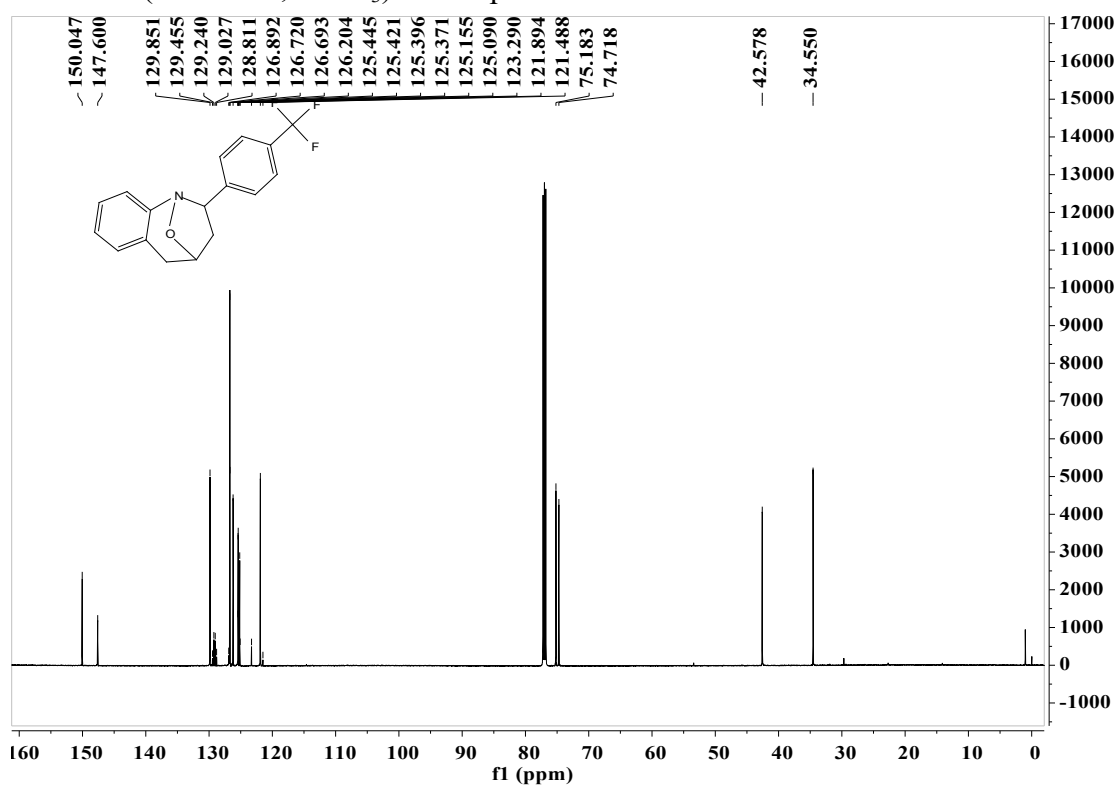

<sup>1</sup>H NMR (600 MHz, CDCl<sub>3</sub>) of compound **30**

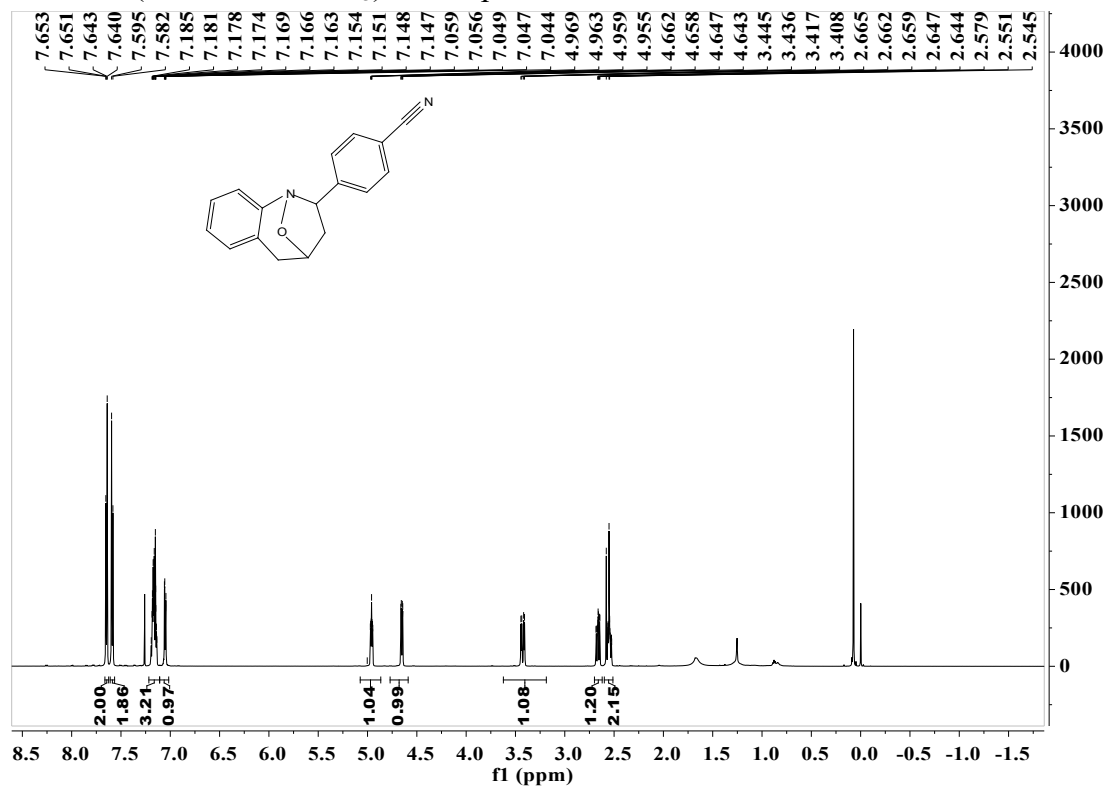

<sup>13</sup>C NMR (151 MHz, CDCl<sub>3</sub>) of compound **30**

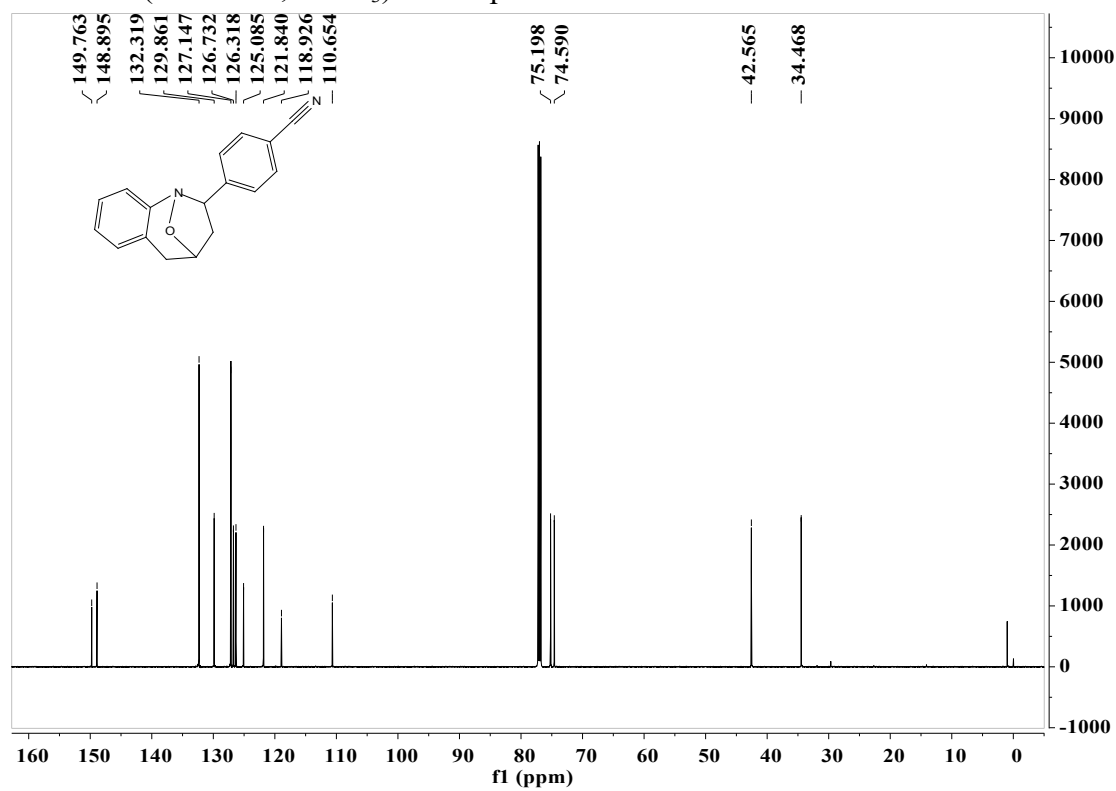

$^1\text{H}$  NMR (600 MHz,  $\text{CDCl}_3$ ) of compound **3p**

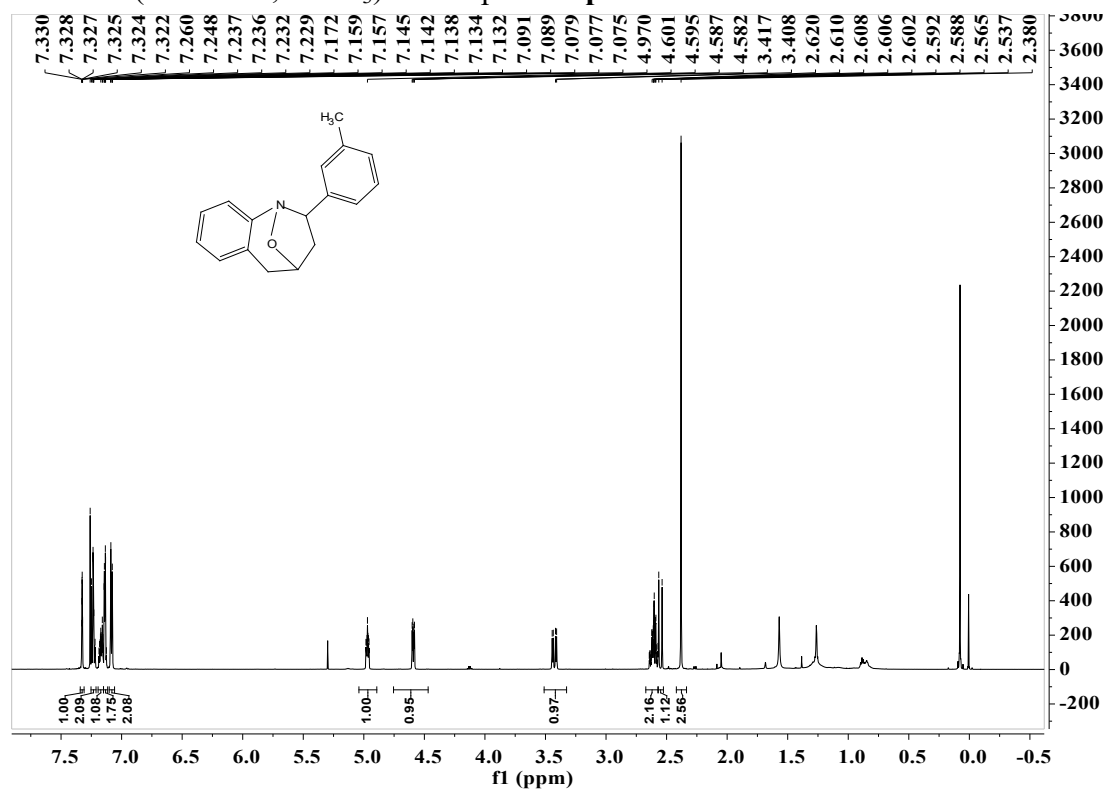

$^{13}\text{C}$  NMR (151 MHz,  $\text{CDCl}_3$ ) of compound **3p**

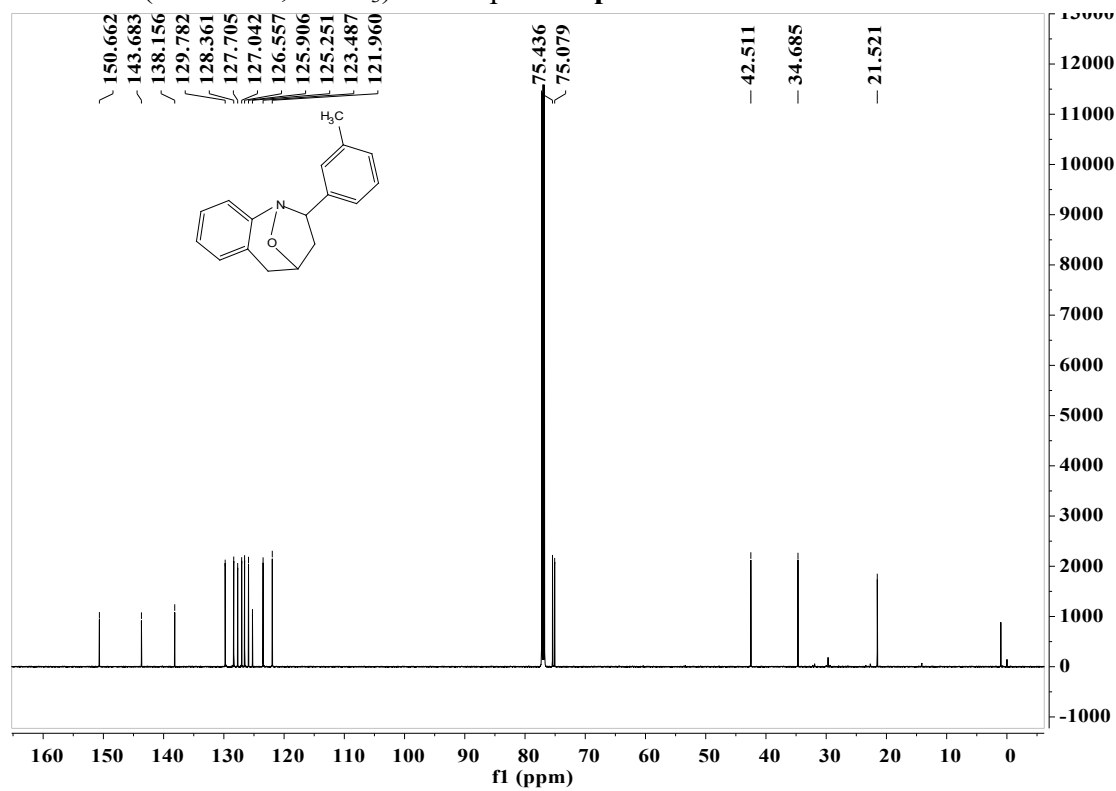

$^1\text{H}$  NMR (600 MHz,  $\text{CDCl}_3$ ) of compound **3q**

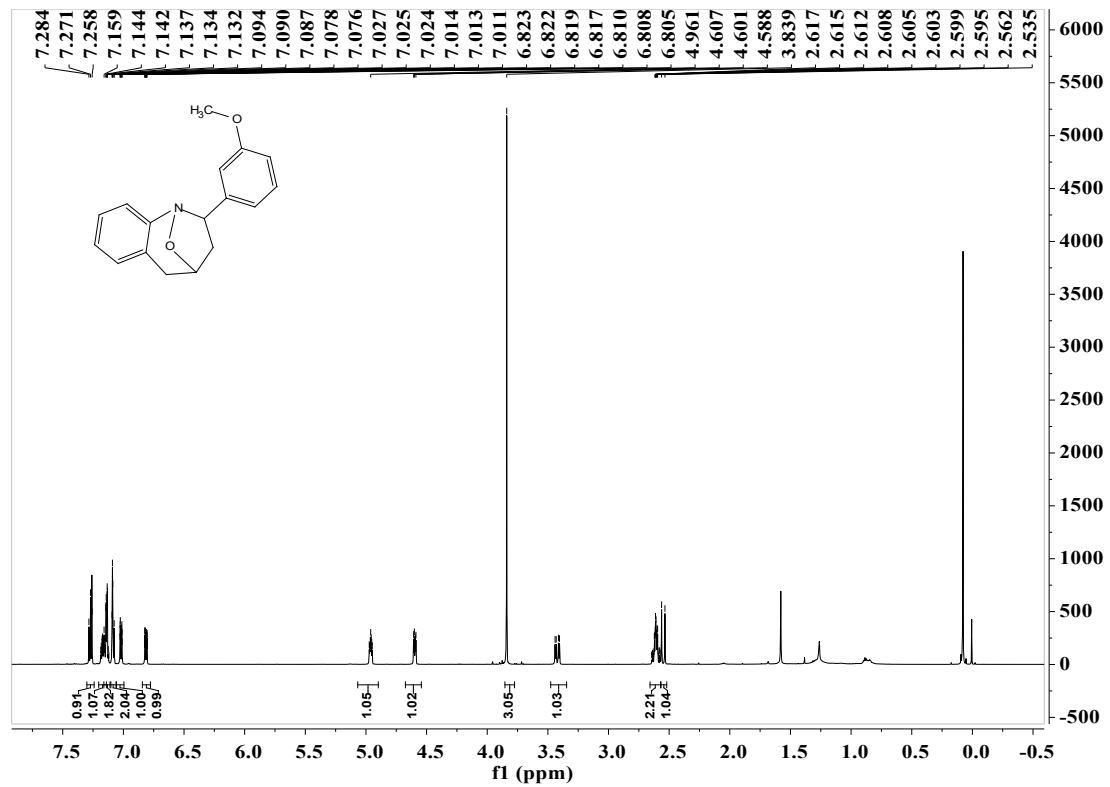

$^{13}\text{C}$  NMR (151 MHz,  $\text{CDCl}_3$ ) of compound **3q**

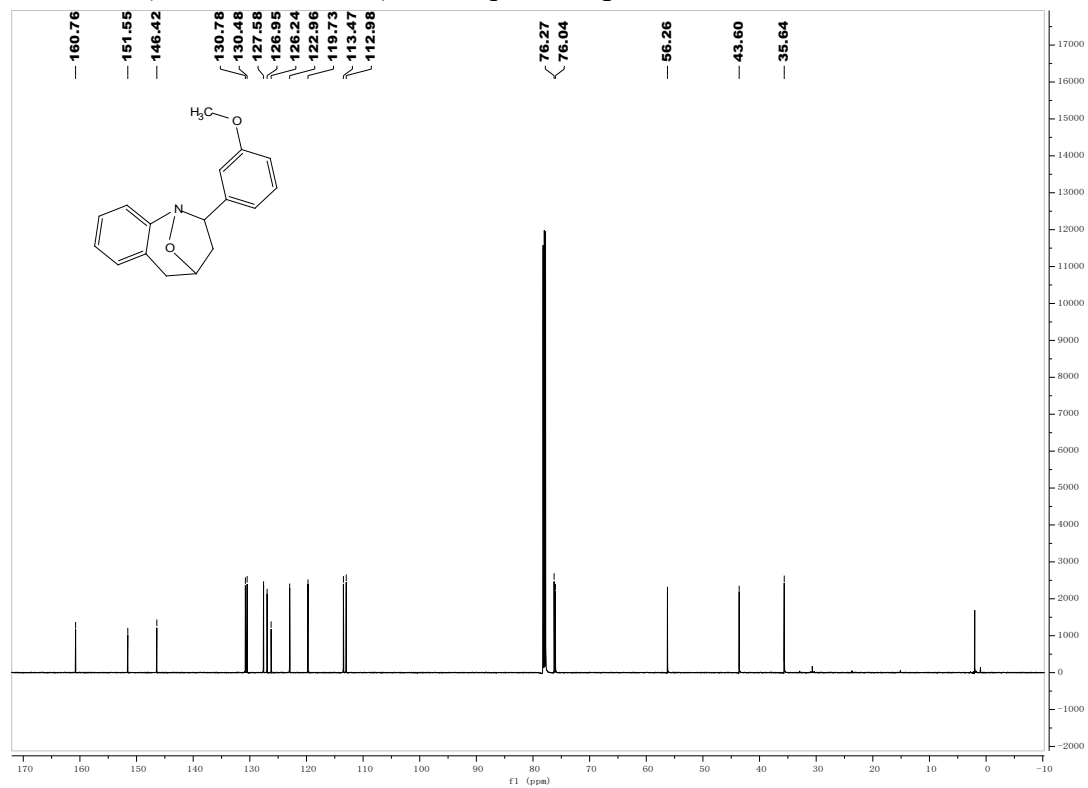

$^1\text{H}$  NMR (600 MHz,  $\text{CDCl}_3$ ) of compound **3r**

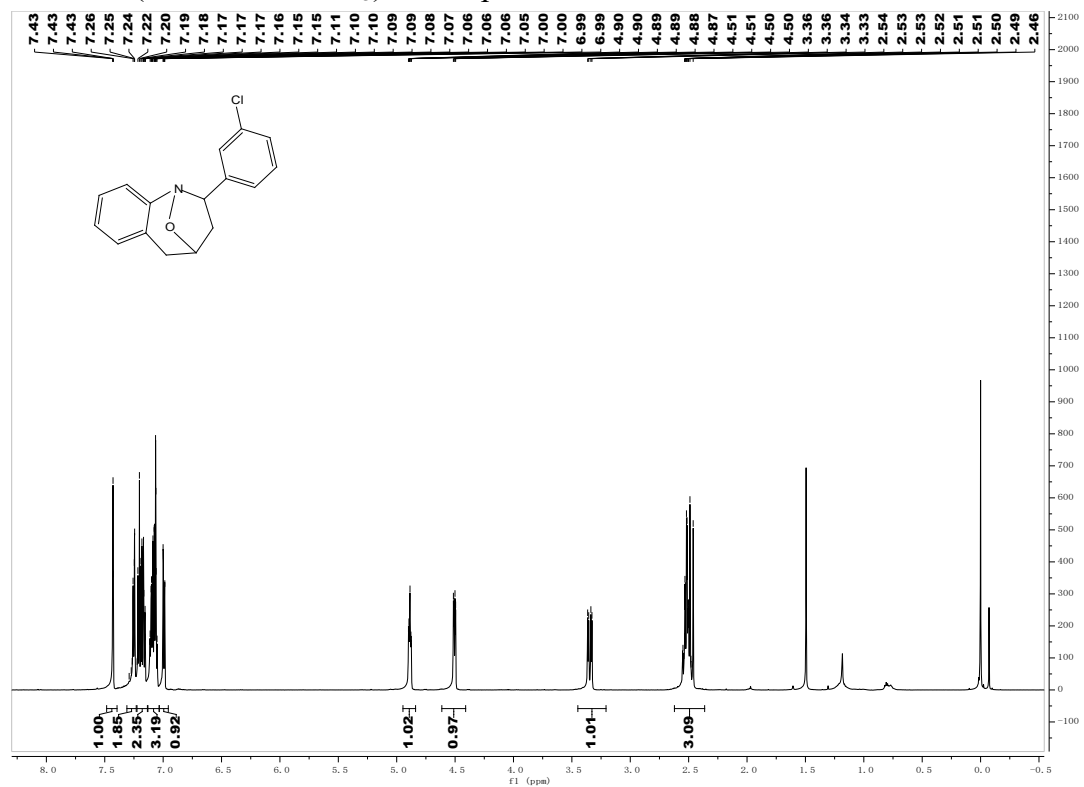

$^{13}\text{C}$  NMR (151 MHz,  $\text{CDCl}_3$ ) of compound **3r**

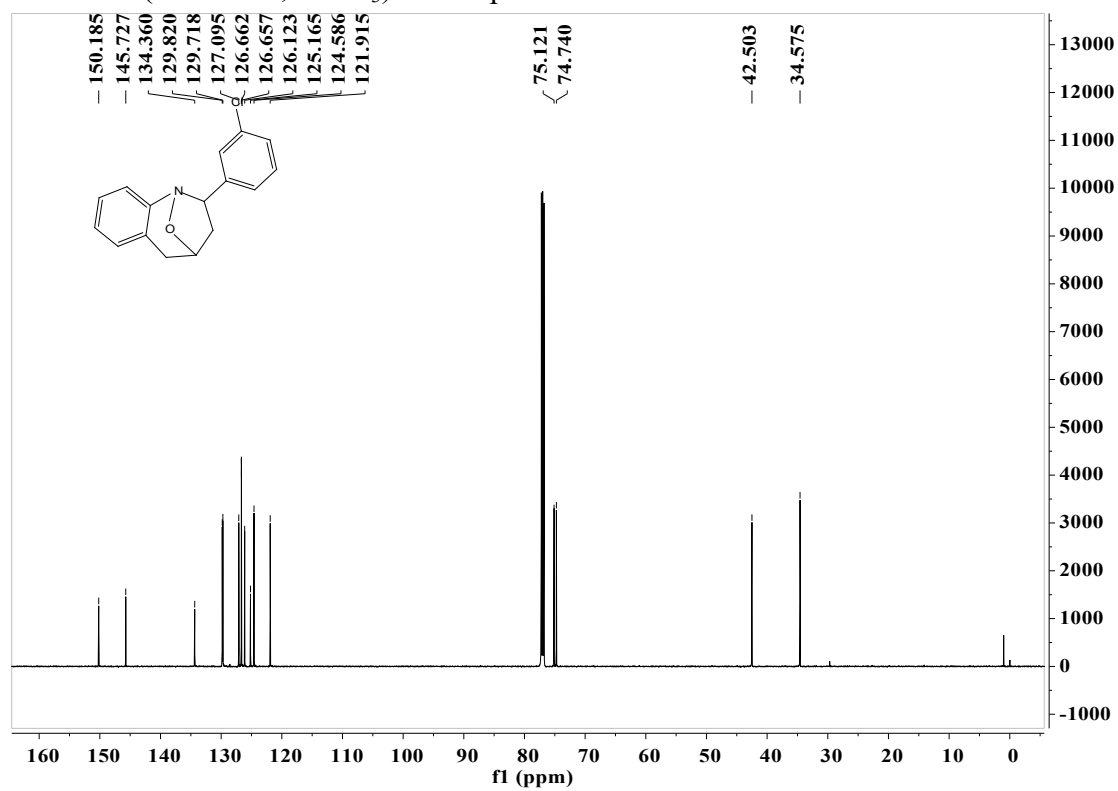



$^1\text{H}$  NMR (600 MHz,  $\text{CDCl}_3$ ) of compound **3s**

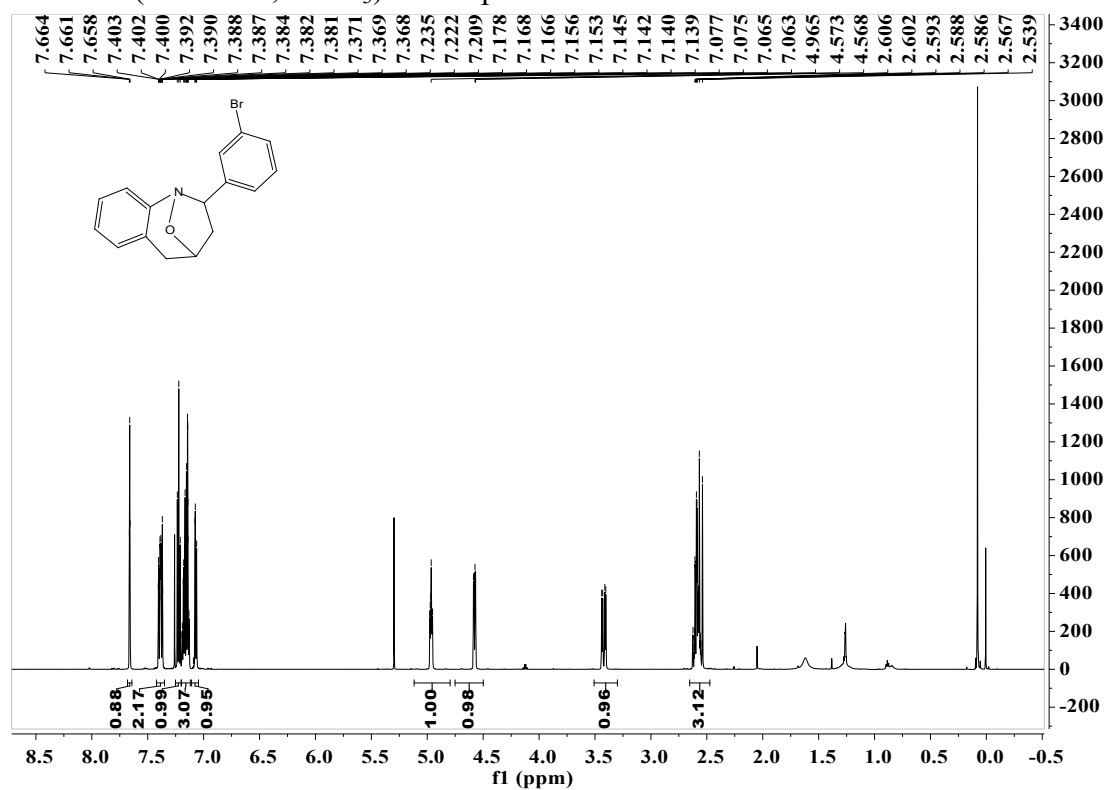

$^{13}\text{C}$  NMR (151 MHz,  $\text{CDCl}_3$ ) of compound **3s**

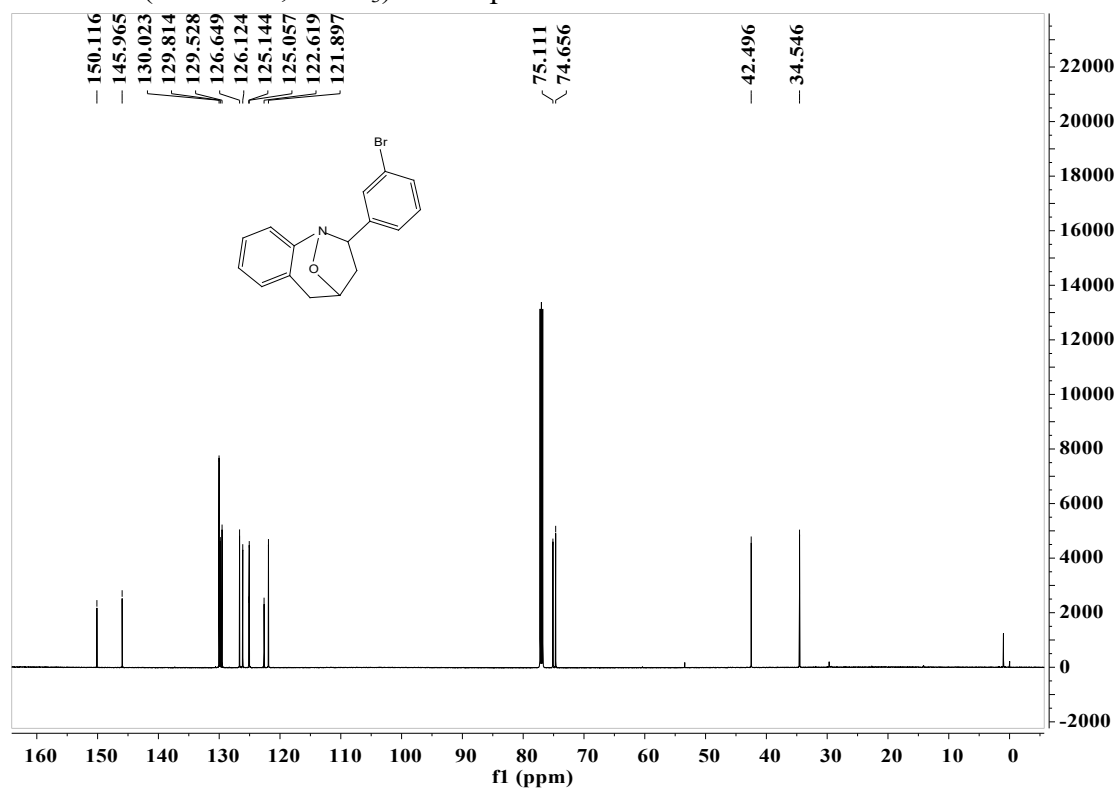

$^1\text{H}$  NMR (600 MHz,  $\text{CDCl}_3$ ) of compound **3t**

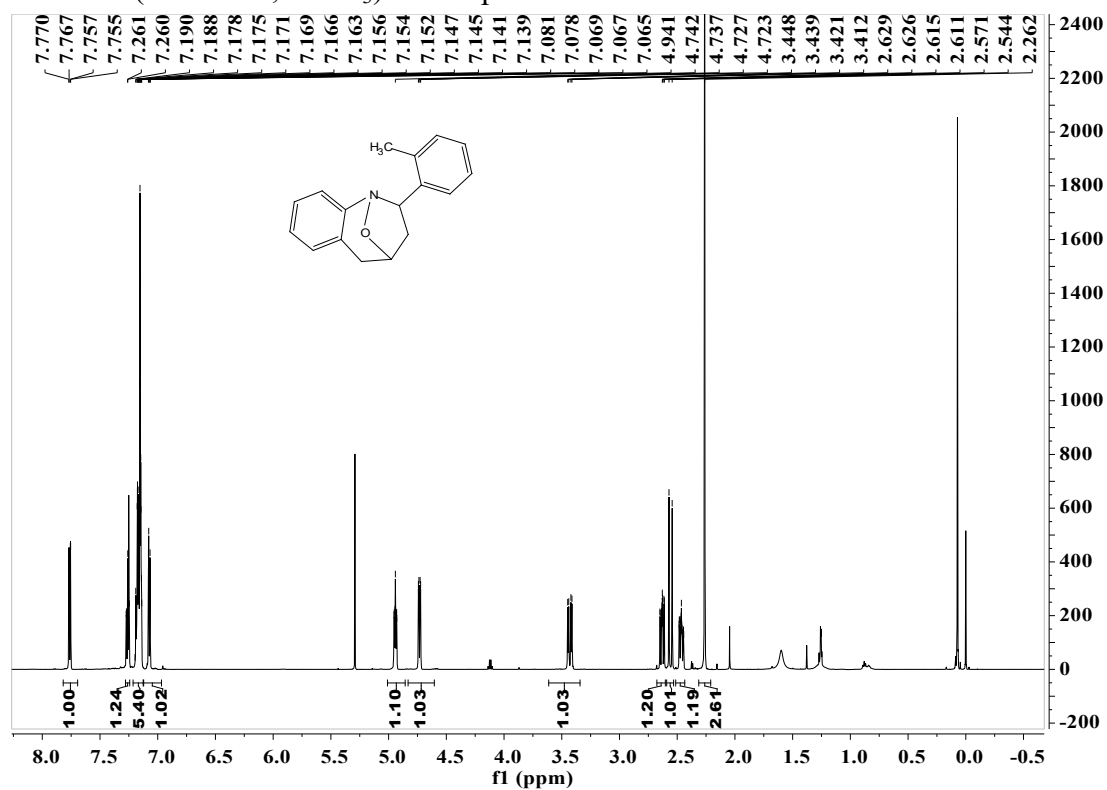

$^{13}\text{C}$  NMR (151 MHz,  $\text{CDCl}_3$ ) of compound **3t**

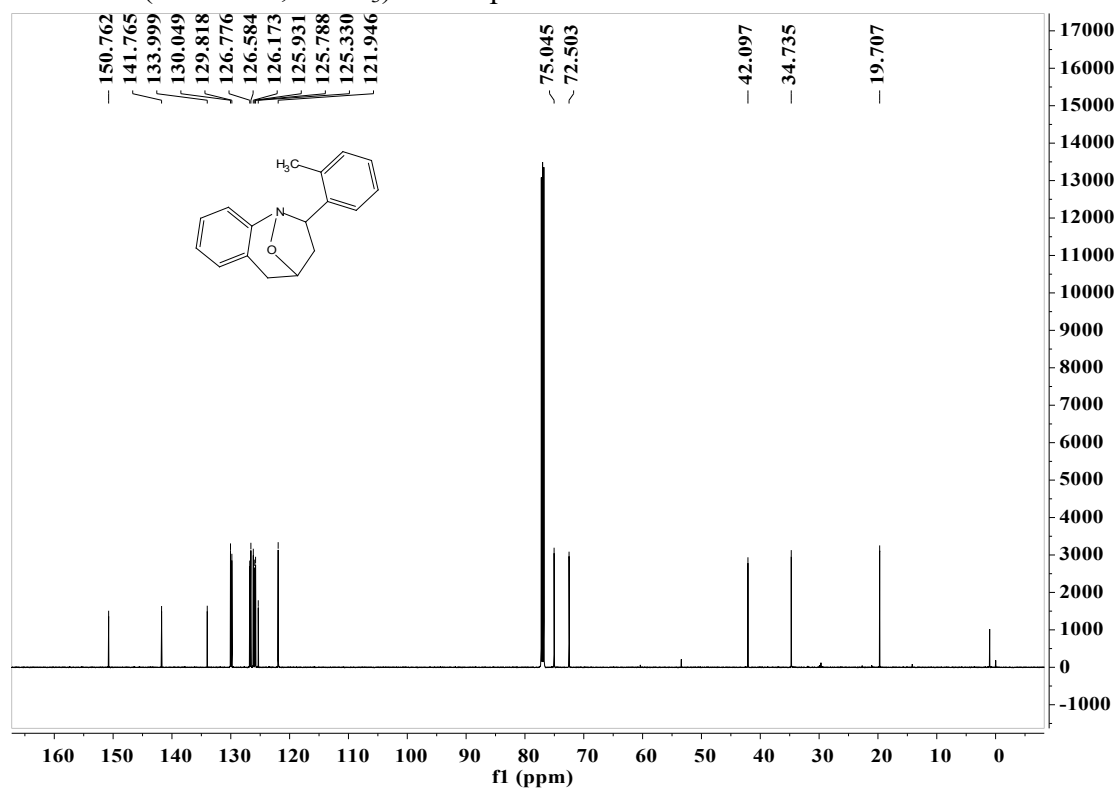

<sup>1</sup>H NMR (600 MHz, CDCl<sub>3</sub>) of compound **3u**

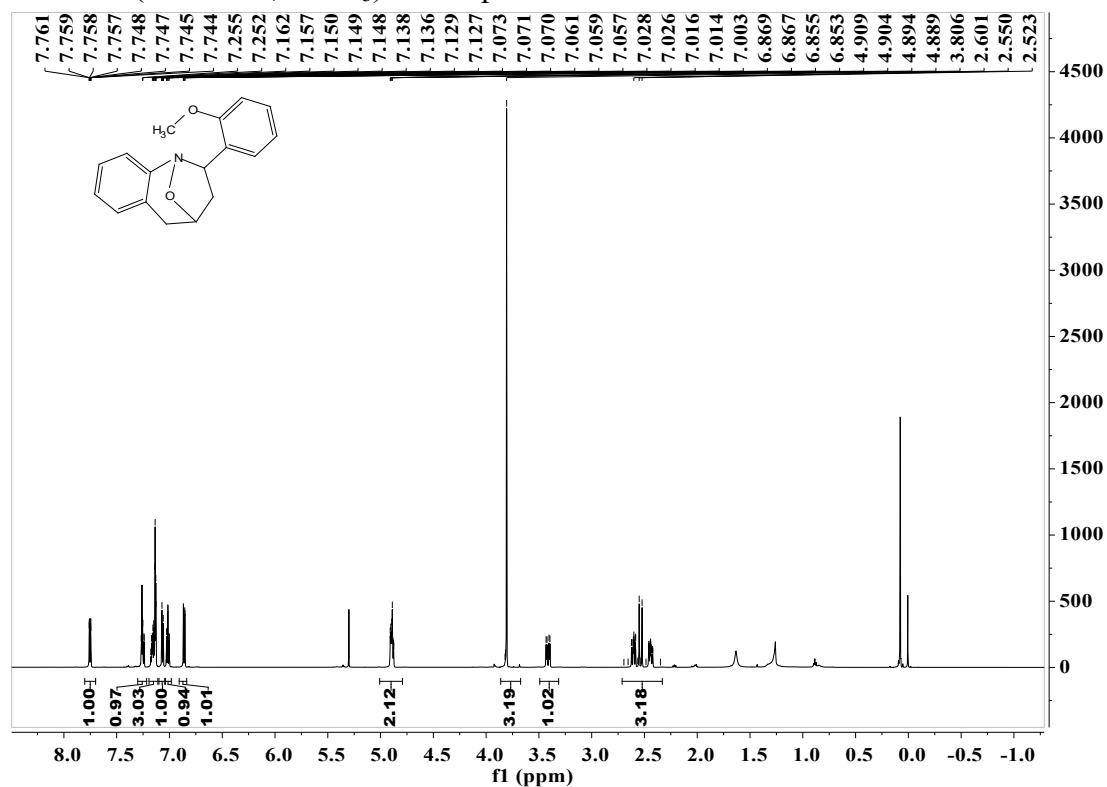

<sup>13</sup>C NMR (151 MHz, CDCl<sub>3</sub>) of compound **3u**

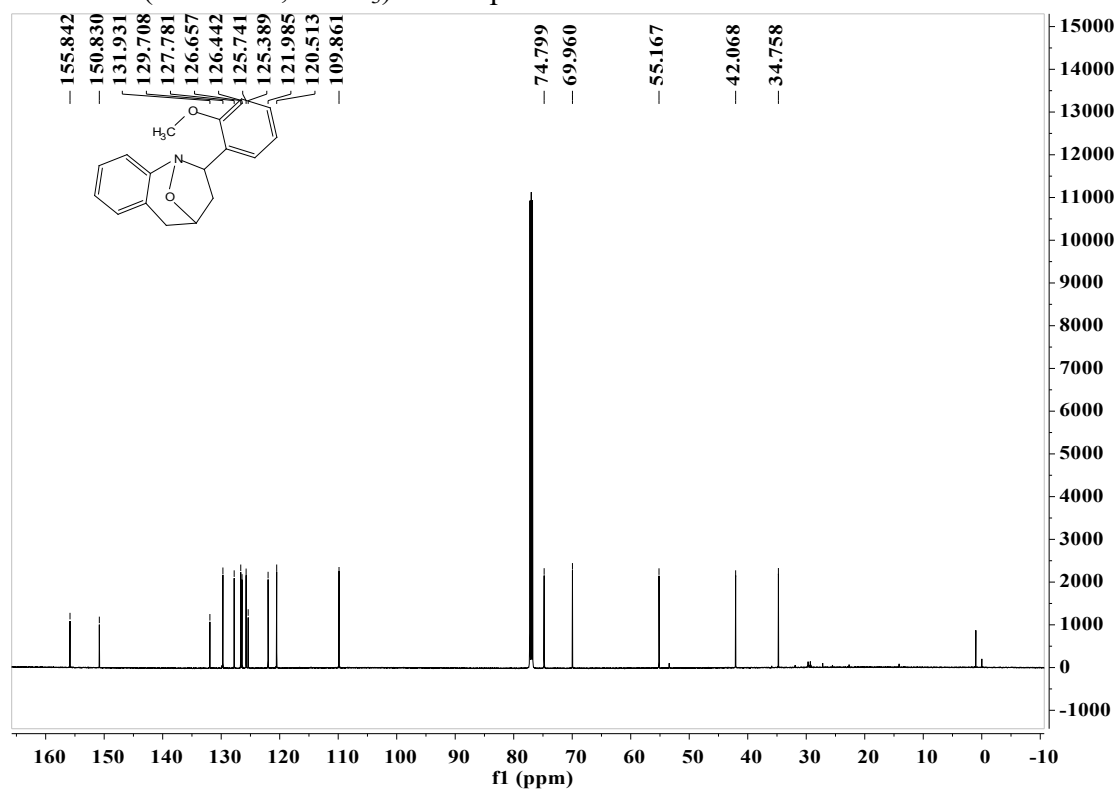

<sup>1</sup>H NMR (600 MHz, CDCl<sub>3</sub>) of compound **3v**

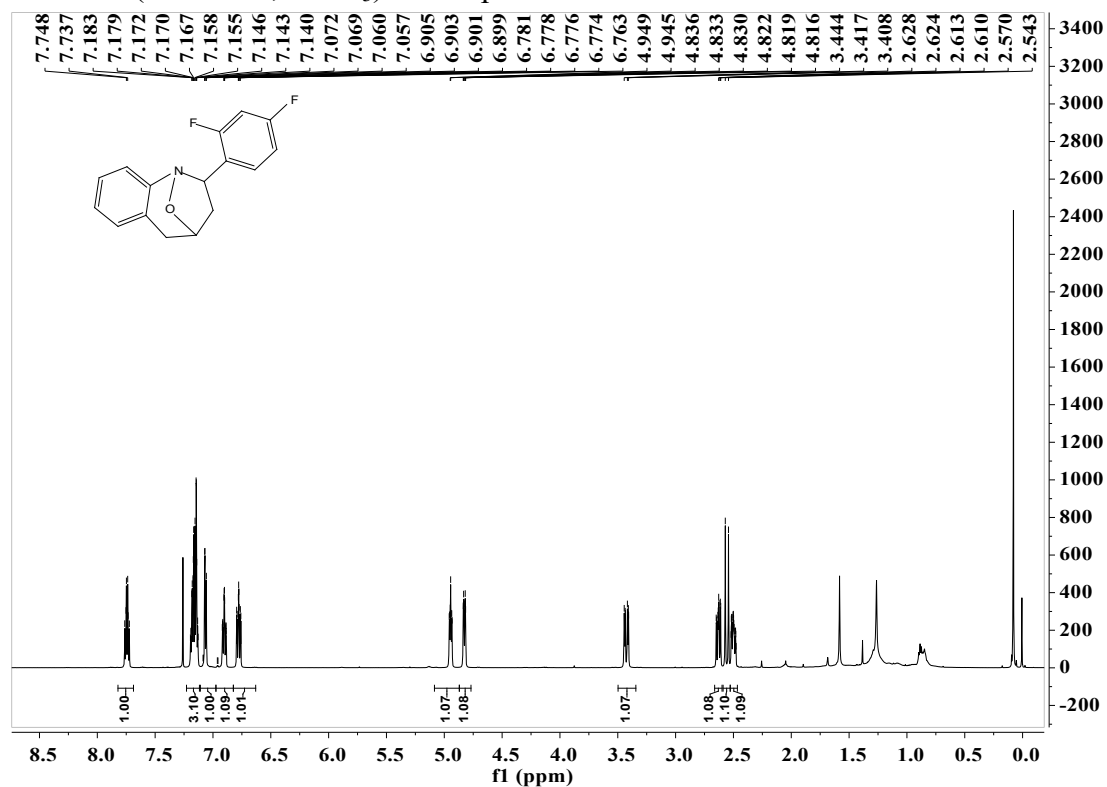

<sup>13</sup>C NMR (151 MHz, CDCl<sub>3</sub>) of compound **3v**

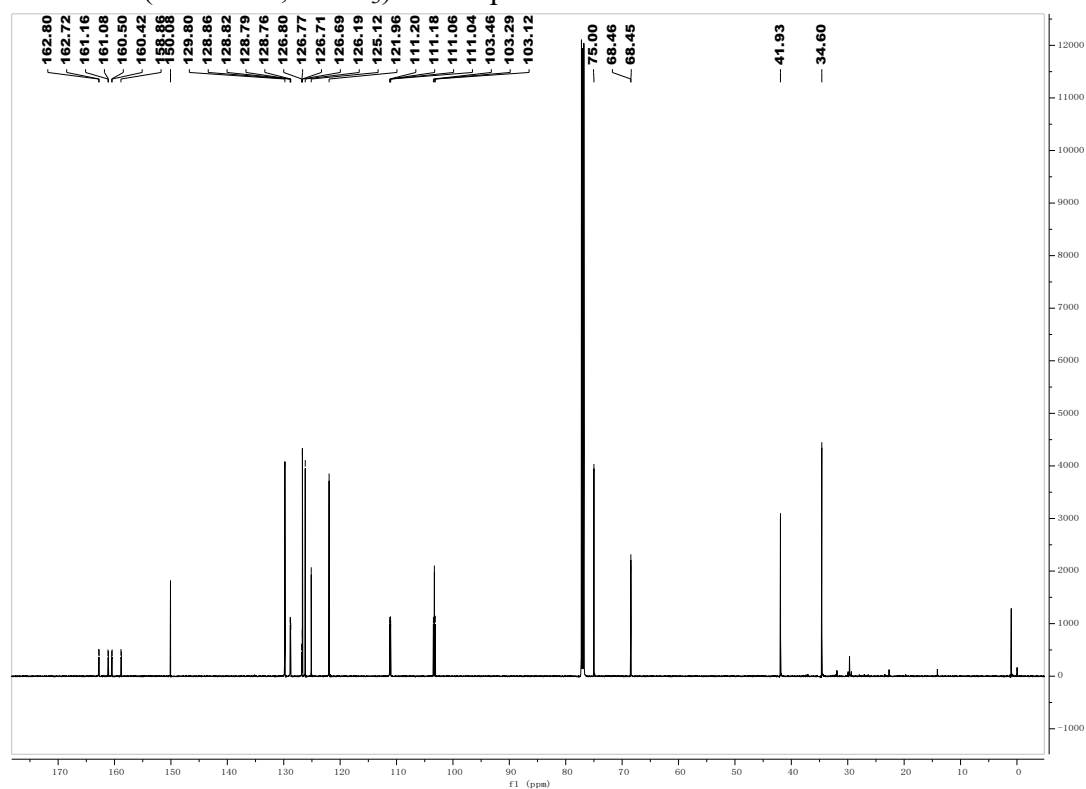

$^1\text{H}$  NMR (600 MHz,  $\text{CDCl}_3$ ) of compound **3w**

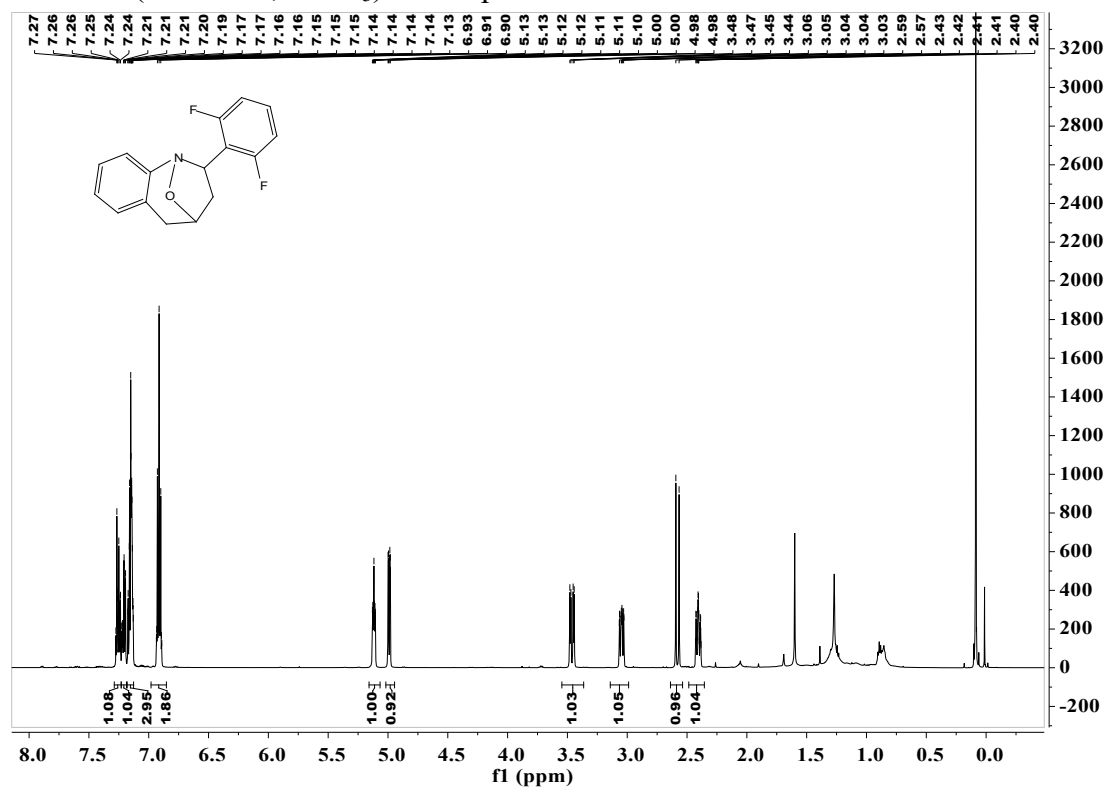

$^{13}\text{C}$  NMR (151 MHz,  $\text{CDCl}_3$ ) of compound **3w**

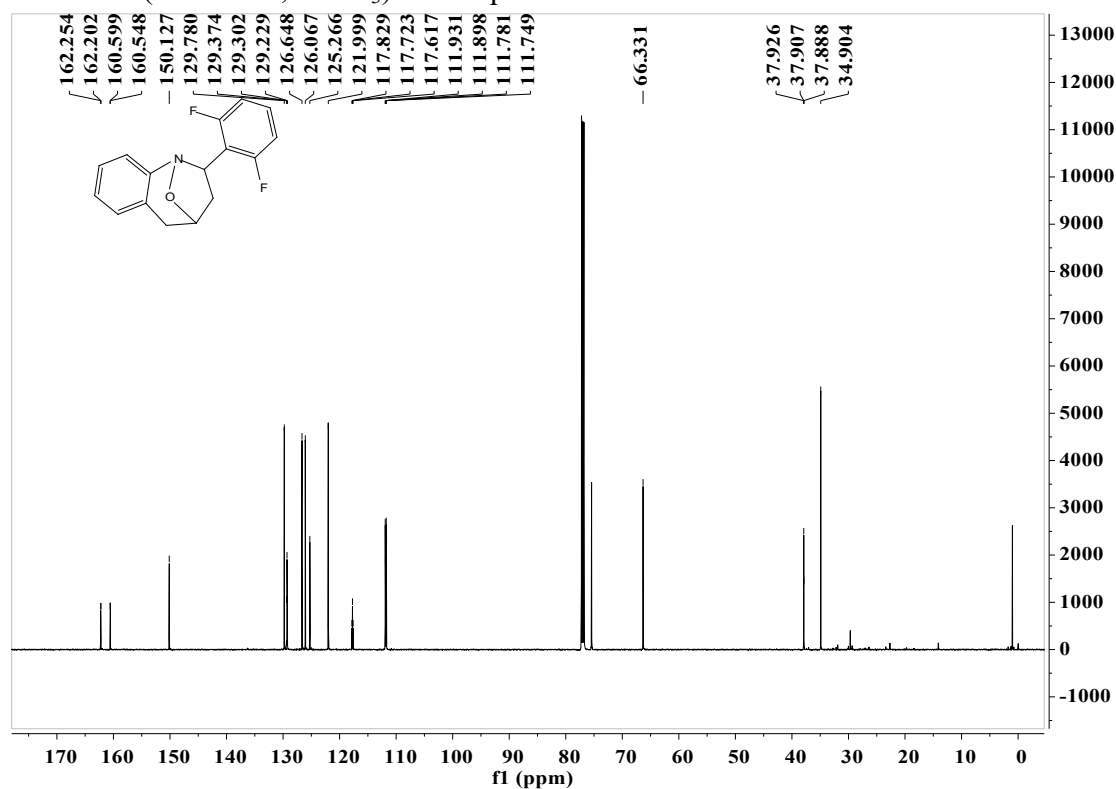

$^1\text{H}$  NMR (600 MHz,  $\text{CDCl}_3$ ) of compound **3x'**

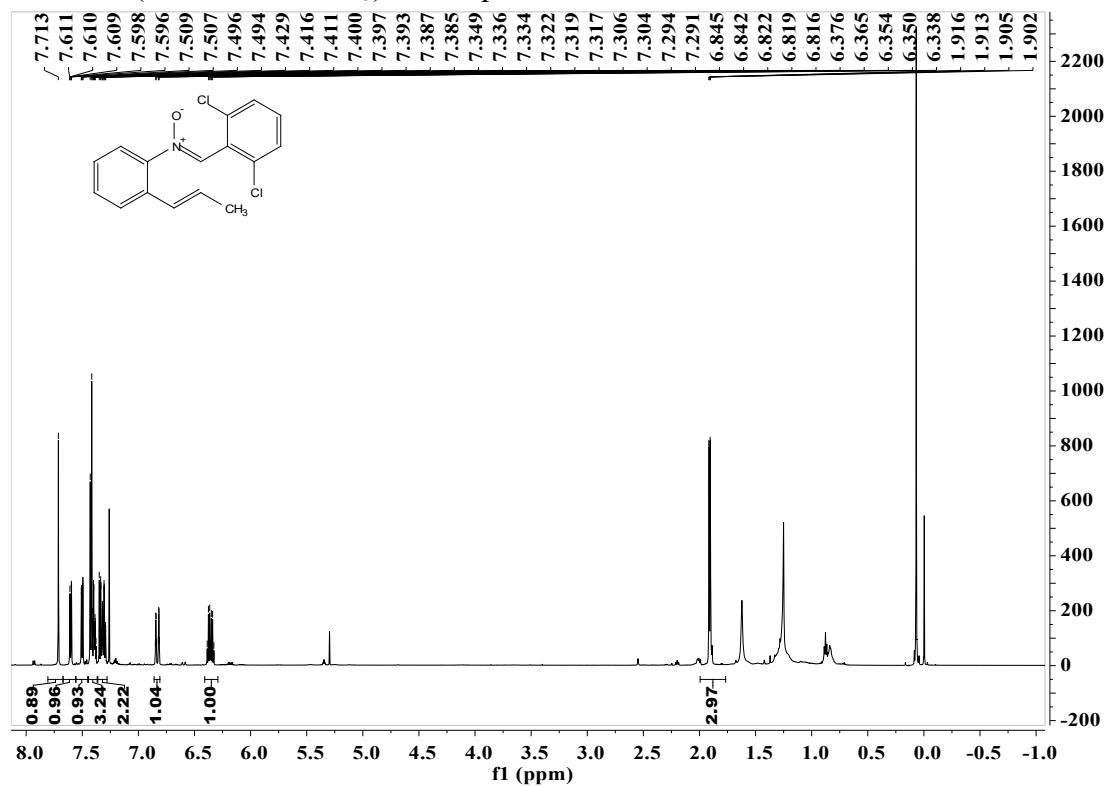

$^{13}\text{C}$  NMR (151 MHz,  $\text{CDCl}_3$ ) of compound **3x'**

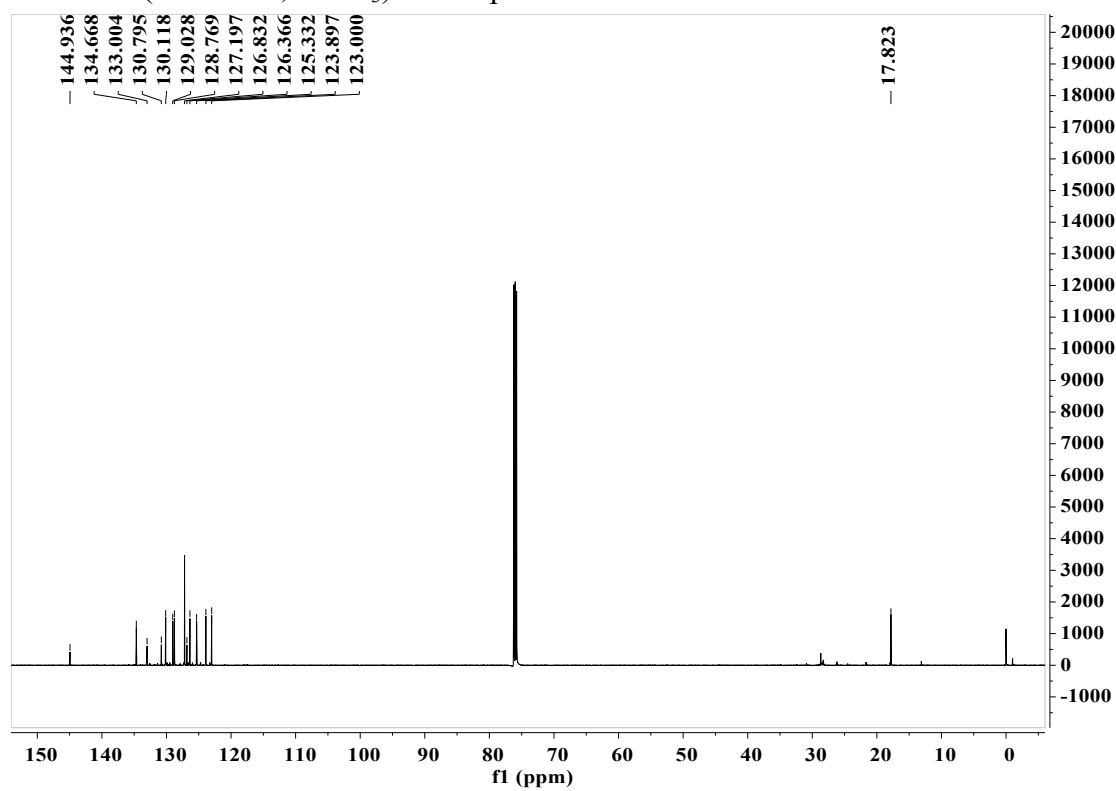

$^1\text{H}$  NMR (600 MHz,  $\text{CDCl}_3$ ) of compound **3y**

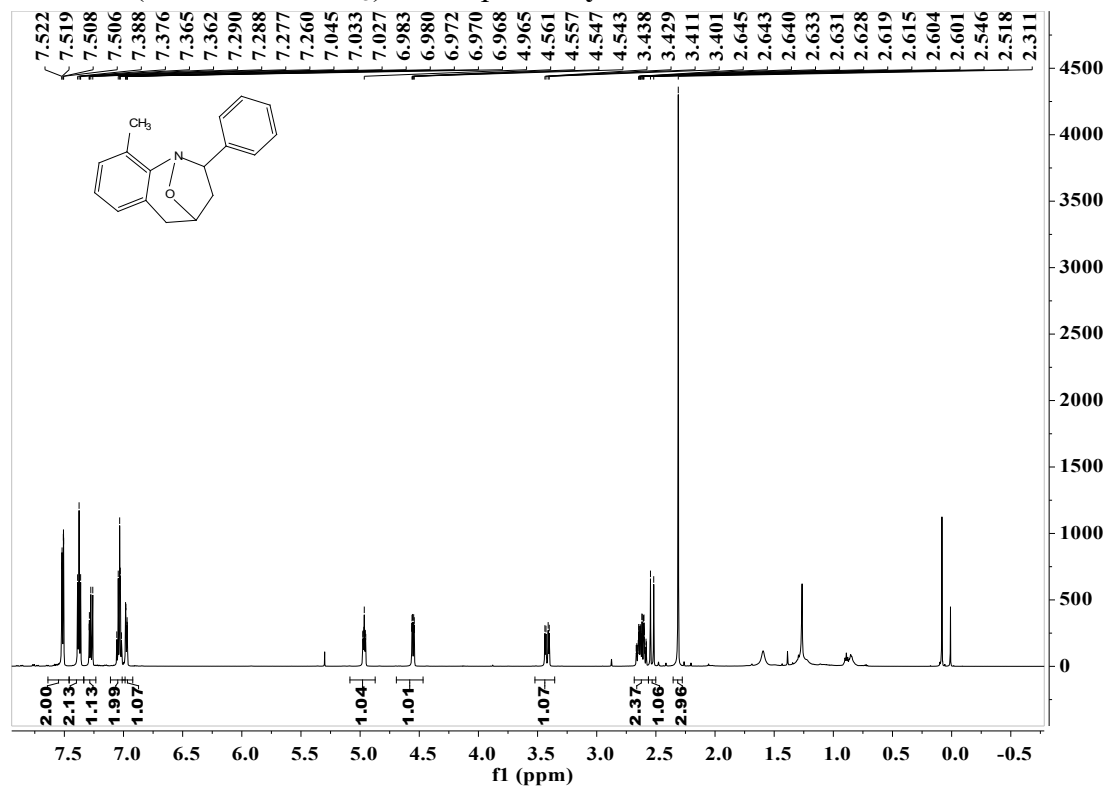

$^{13}\text{C}$  NMR (151 MHz,  $\text{CDCl}_3$ ) of compound **3y**

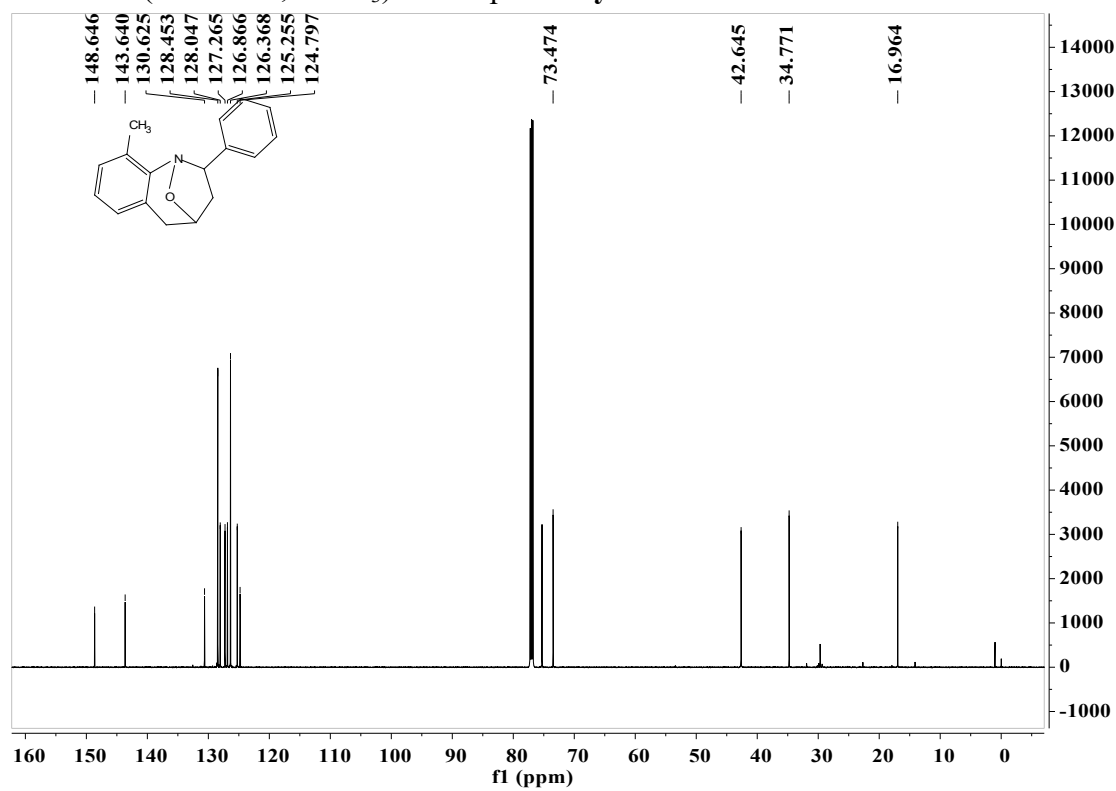

$^1\text{H}$  NMR (600 MHz,  $\text{CDCl}_3$ ) of compound **3z**

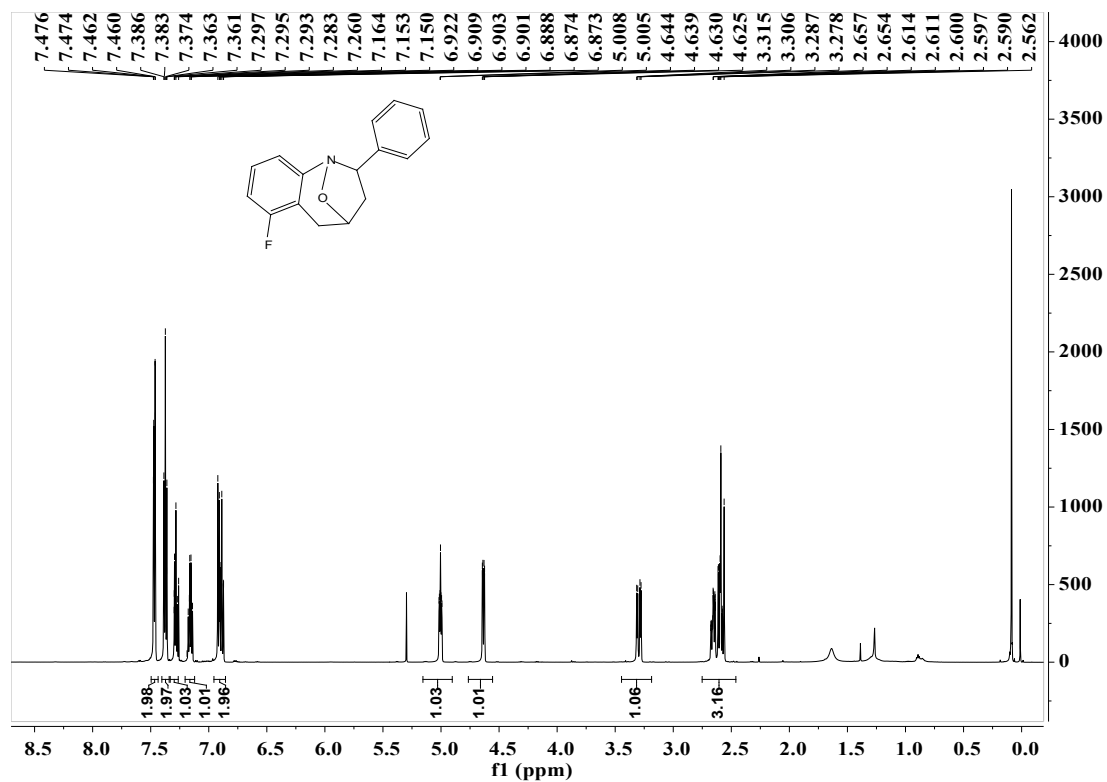

$^{13}\text{C}$  NMR (151 MHz,  $\text{CDCl}_3$ ) of compound **3z**

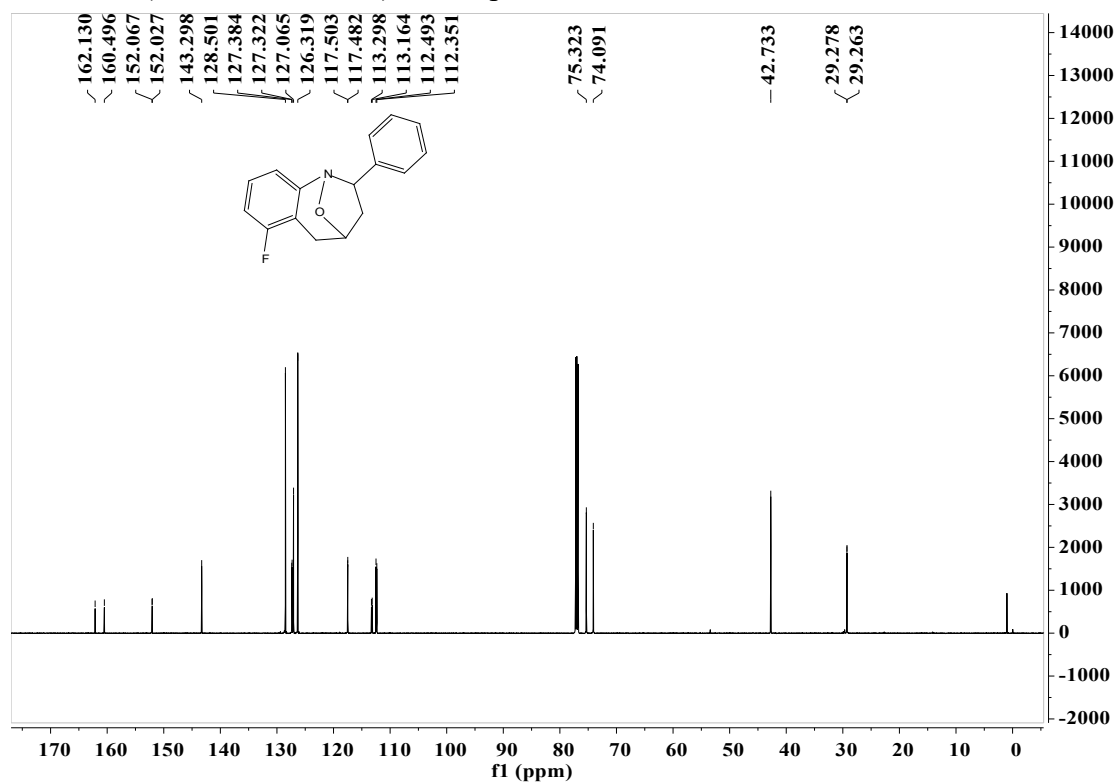



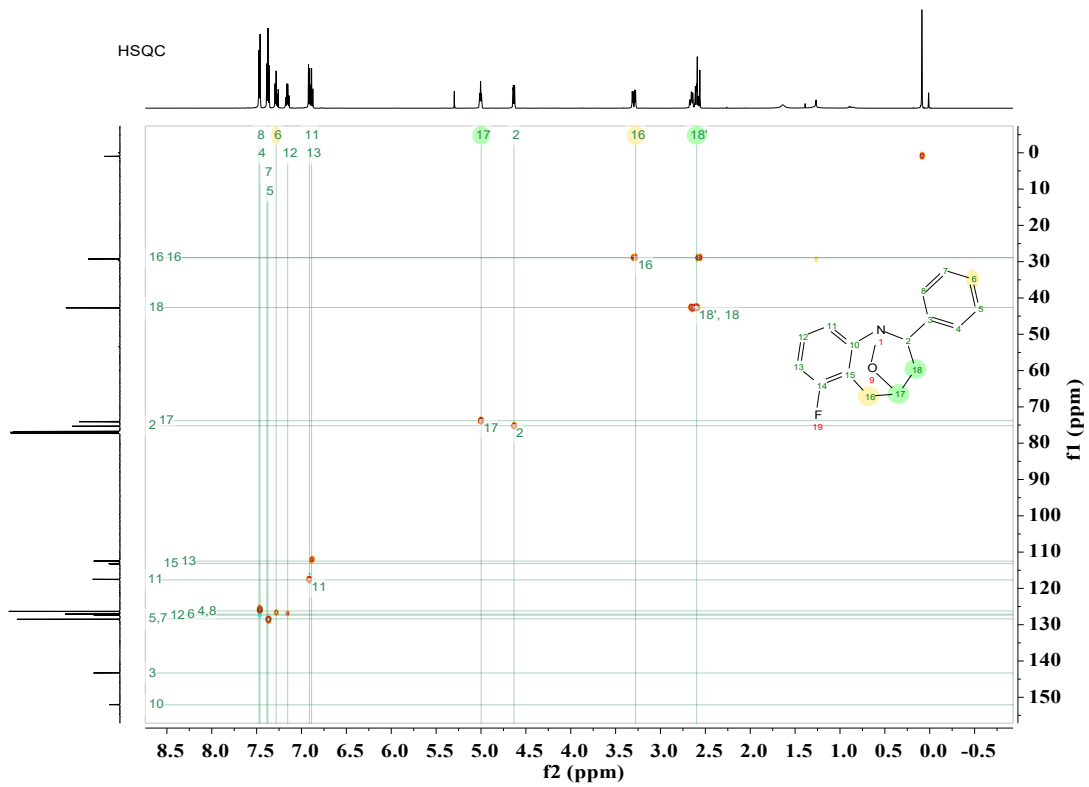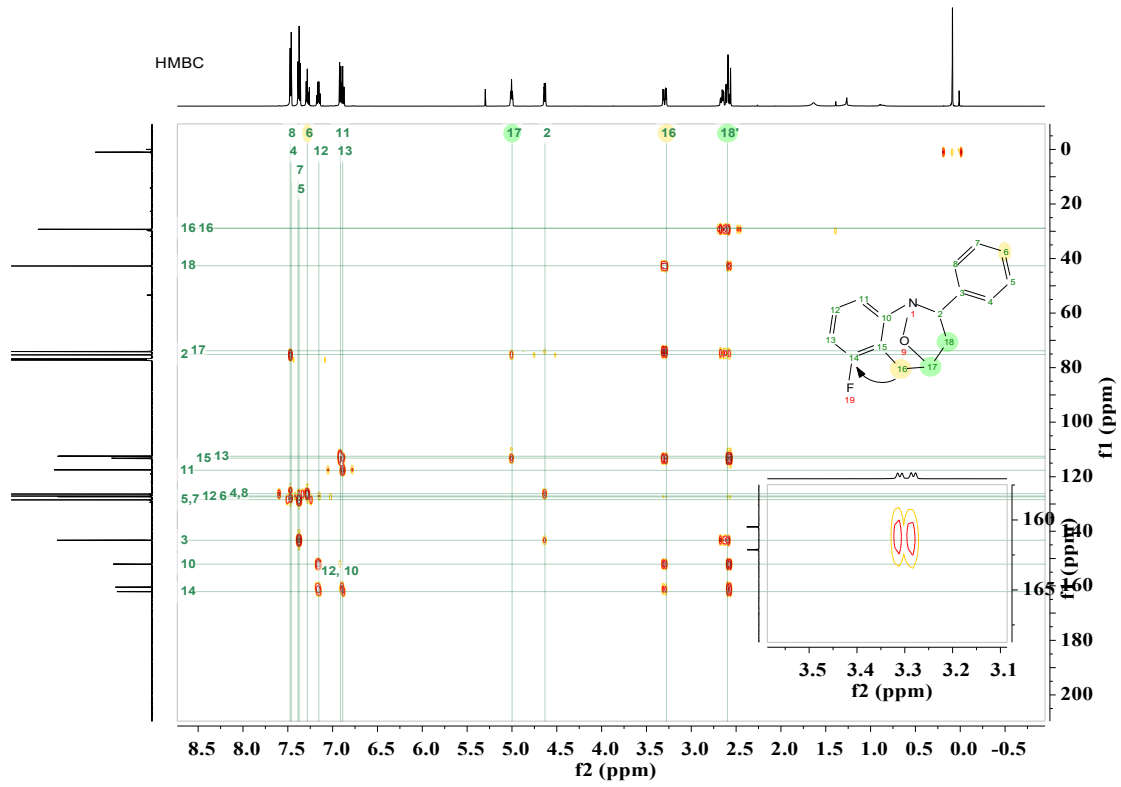

$^1\text{H}$  NMR (600 MHz,  $\text{CDCl}_3$ ) of compound **3aa**

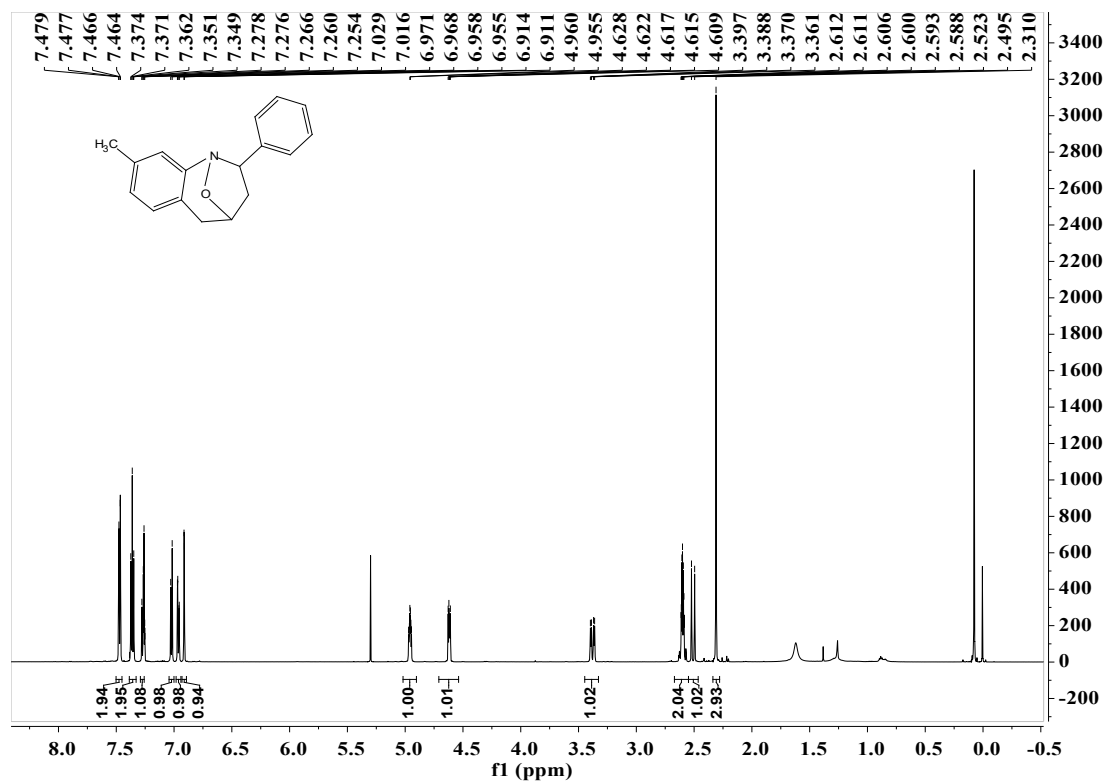

$^{13}\text{C}$  NMR (151 MHz,  $\text{CDCl}_3$ ) of compound **3aa**

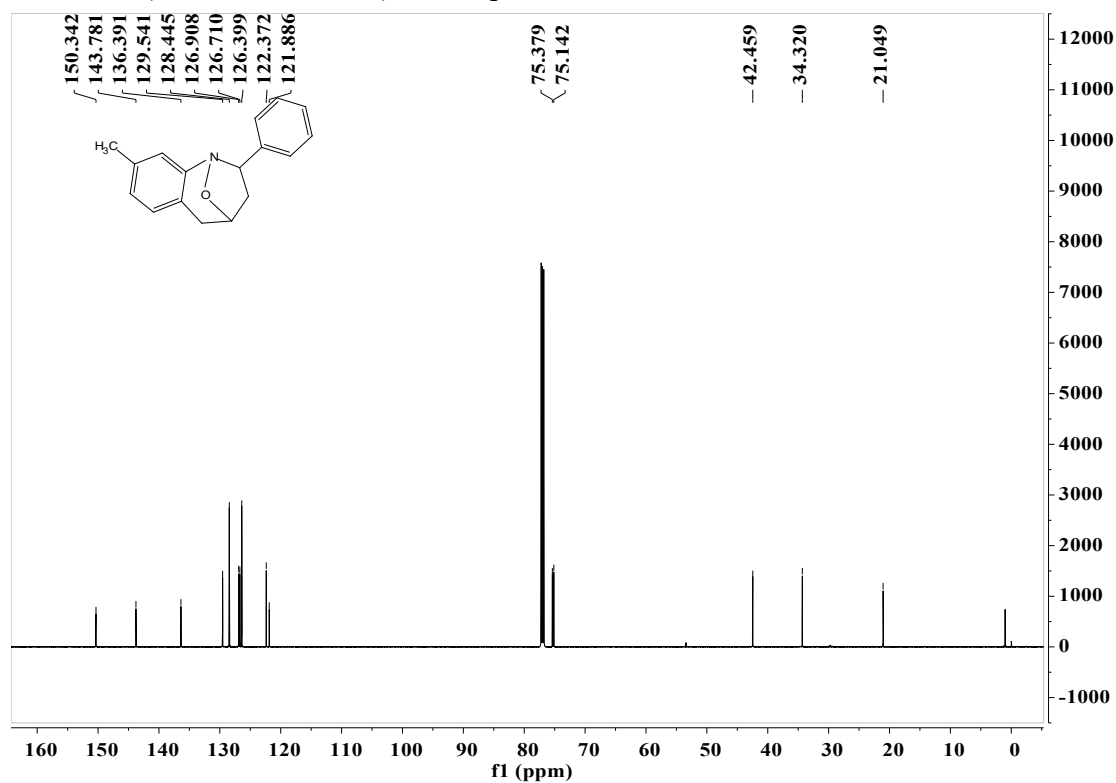

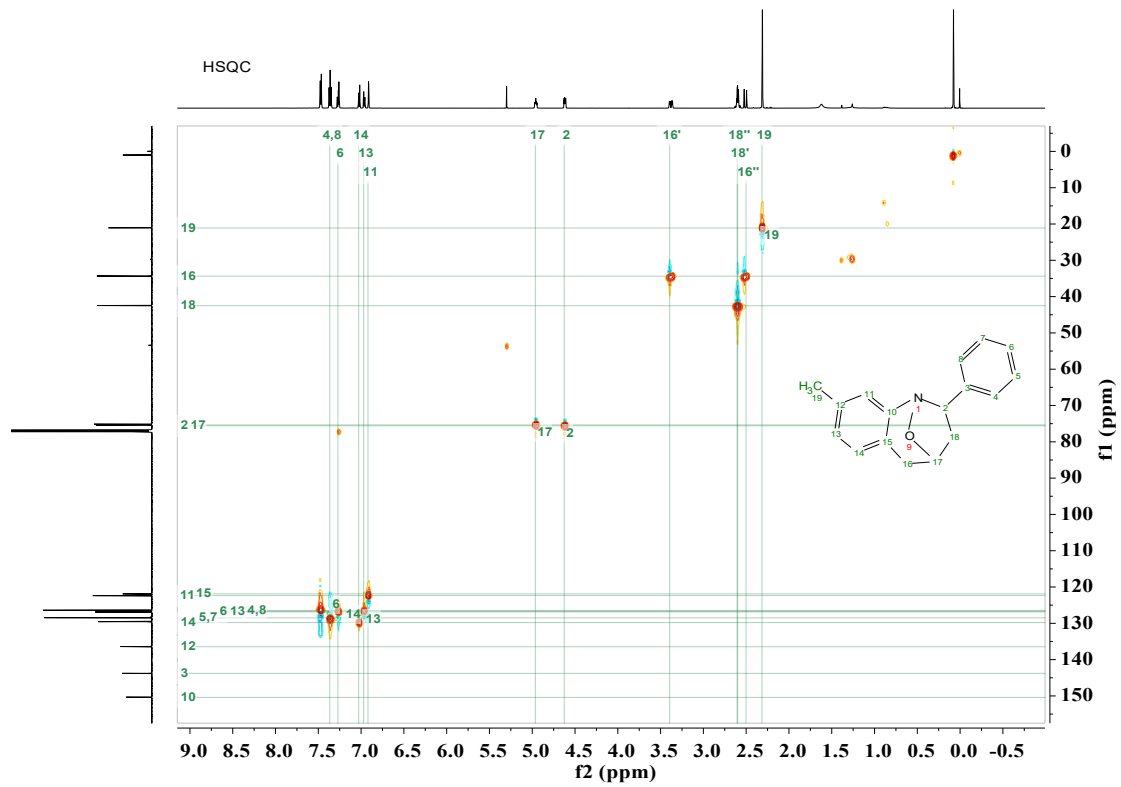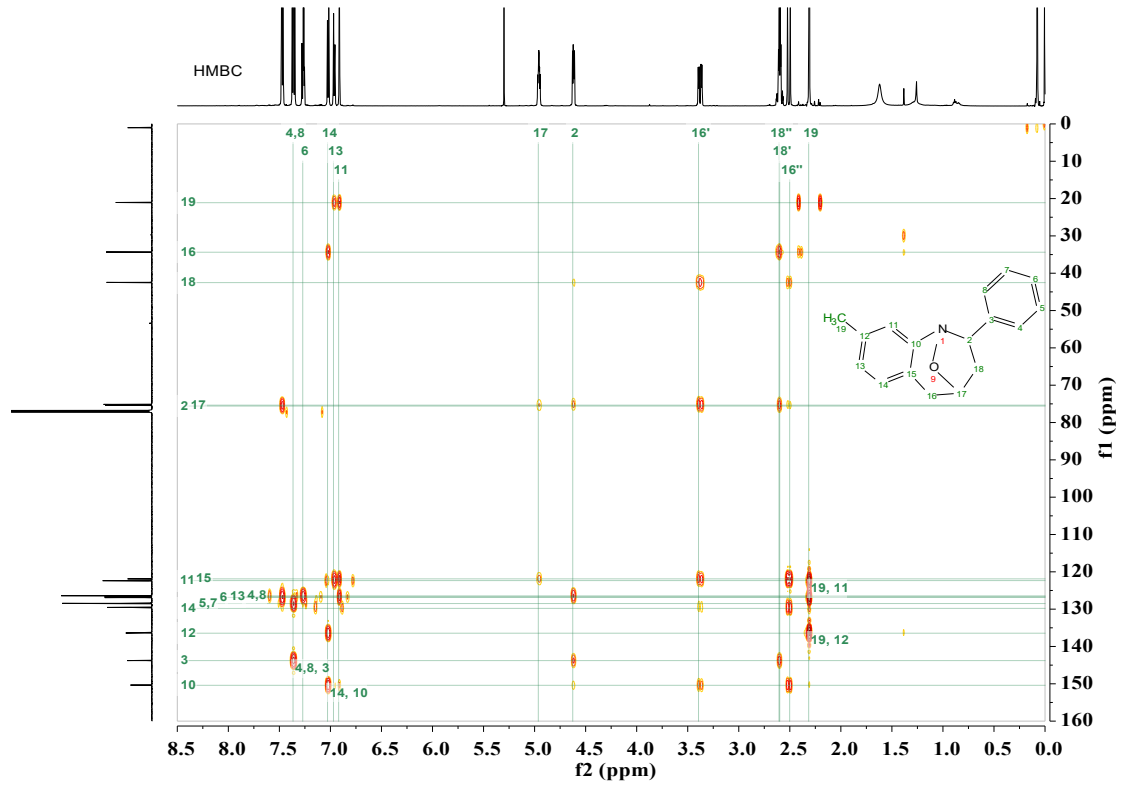

<sup>1</sup>H NMR (600 MHz, CDCl<sub>3</sub>) of compound **3ab**

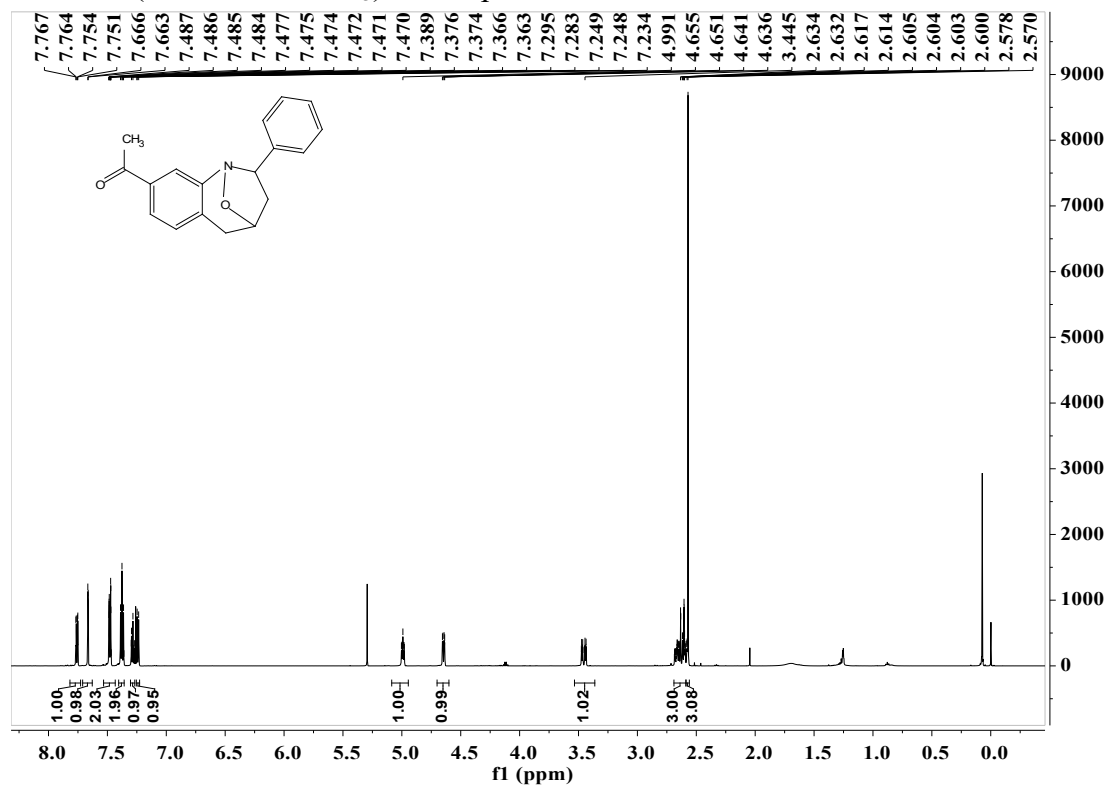

<sup>13</sup>C NMR (151 MHz, CDCl<sub>3</sub>) of compound **3ab**

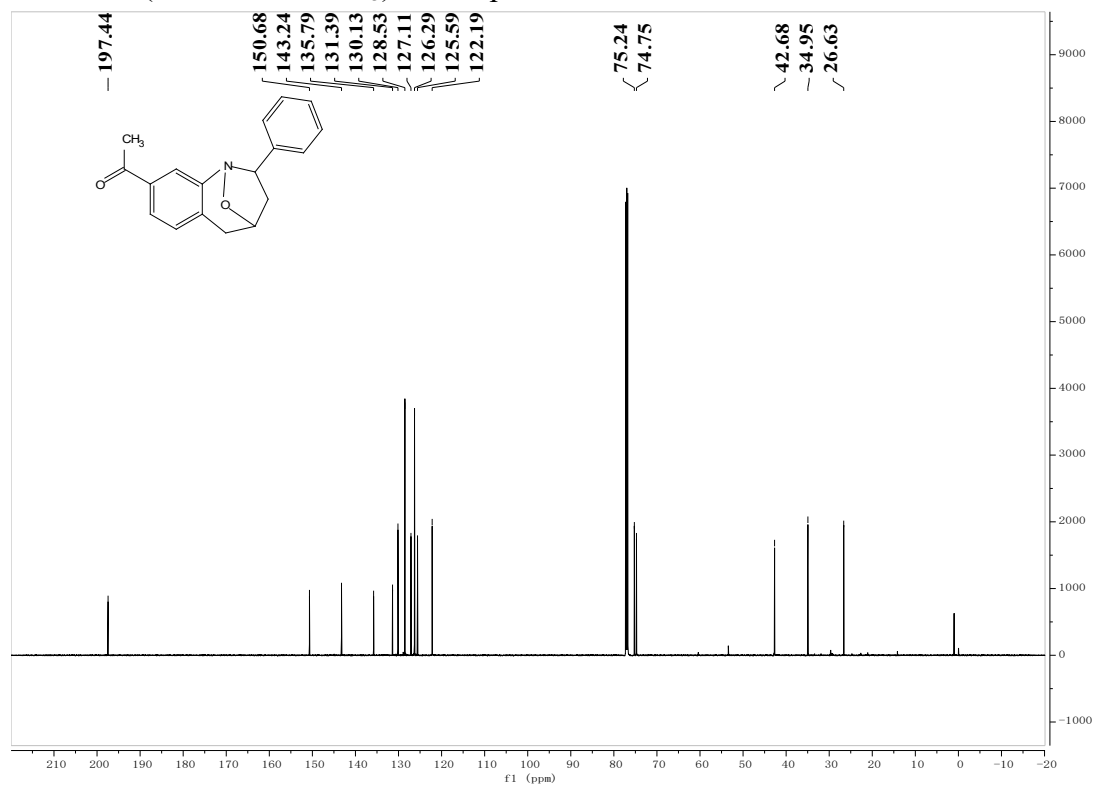

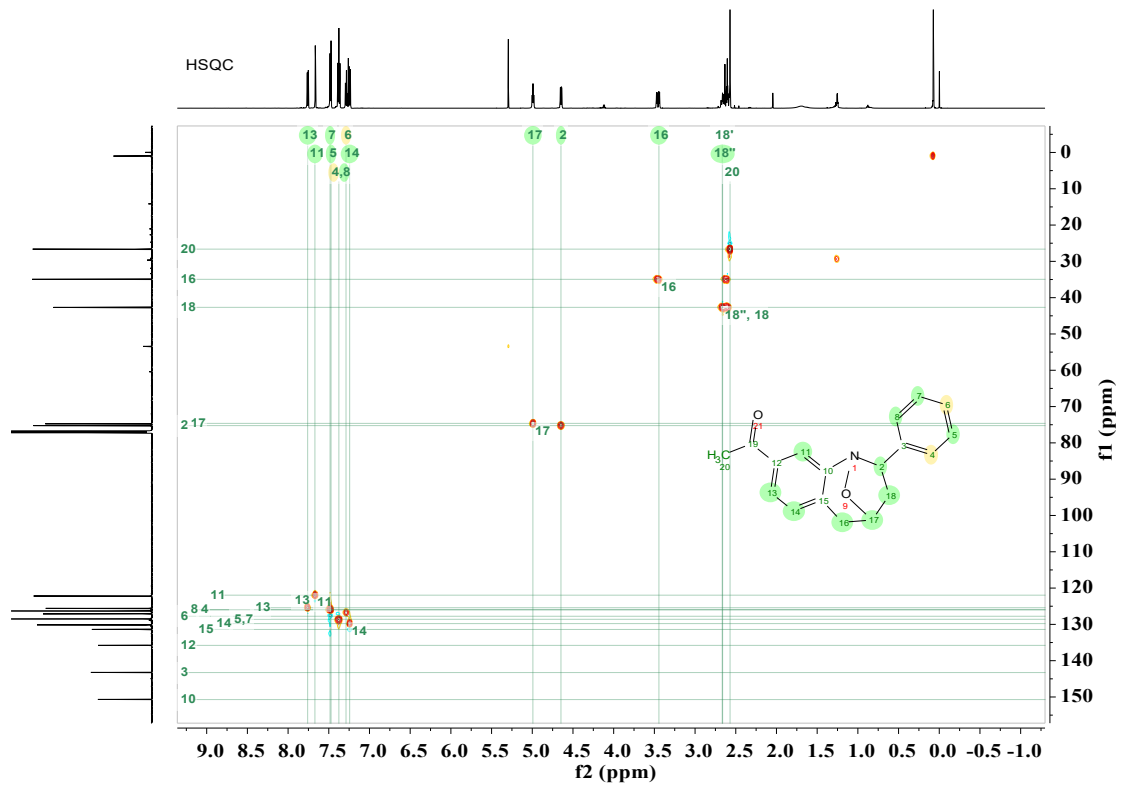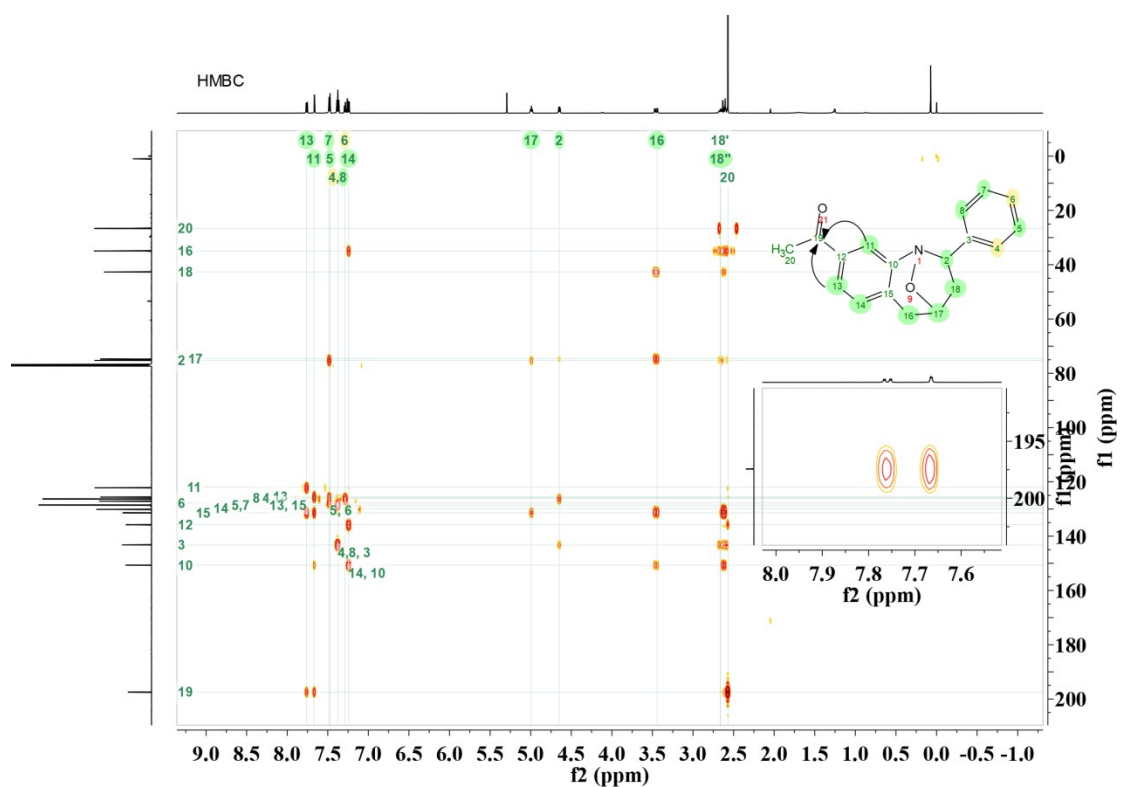

<sup>1</sup>H NMR (600 MHz, CDCl<sub>3</sub>) of compound **3ac**

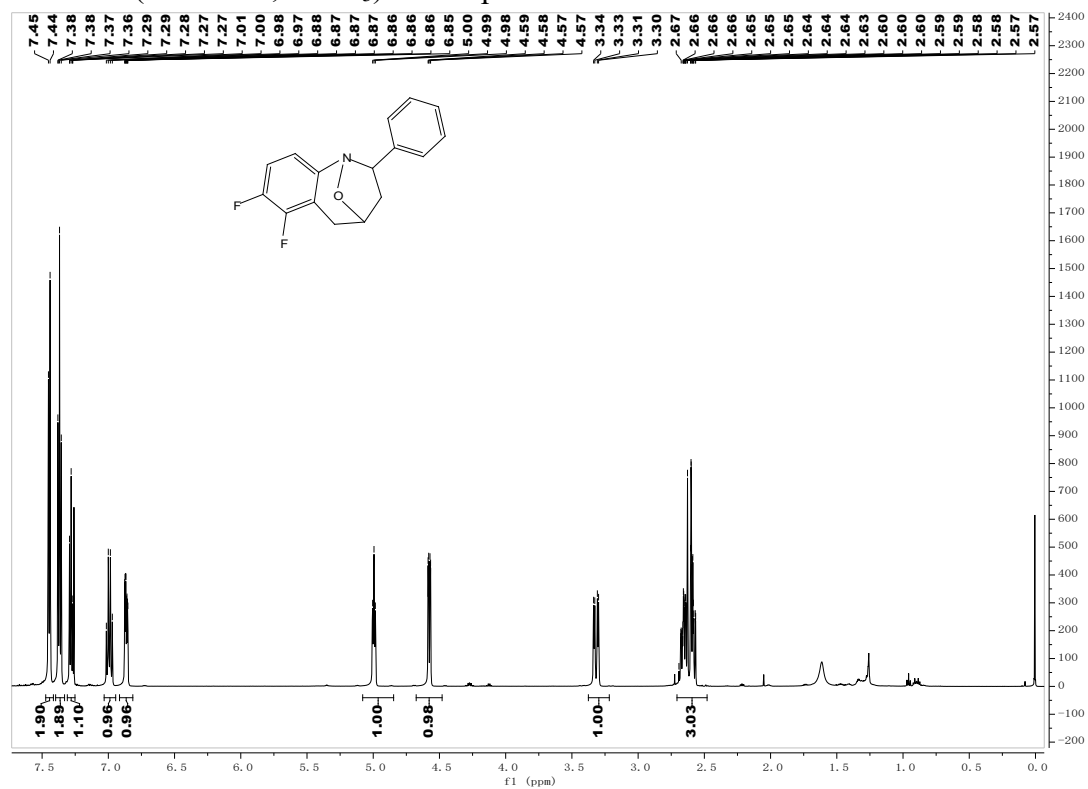

<sup>13</sup>C NMR (151 MHz, CDCl<sub>3</sub>) of compound **3ac**

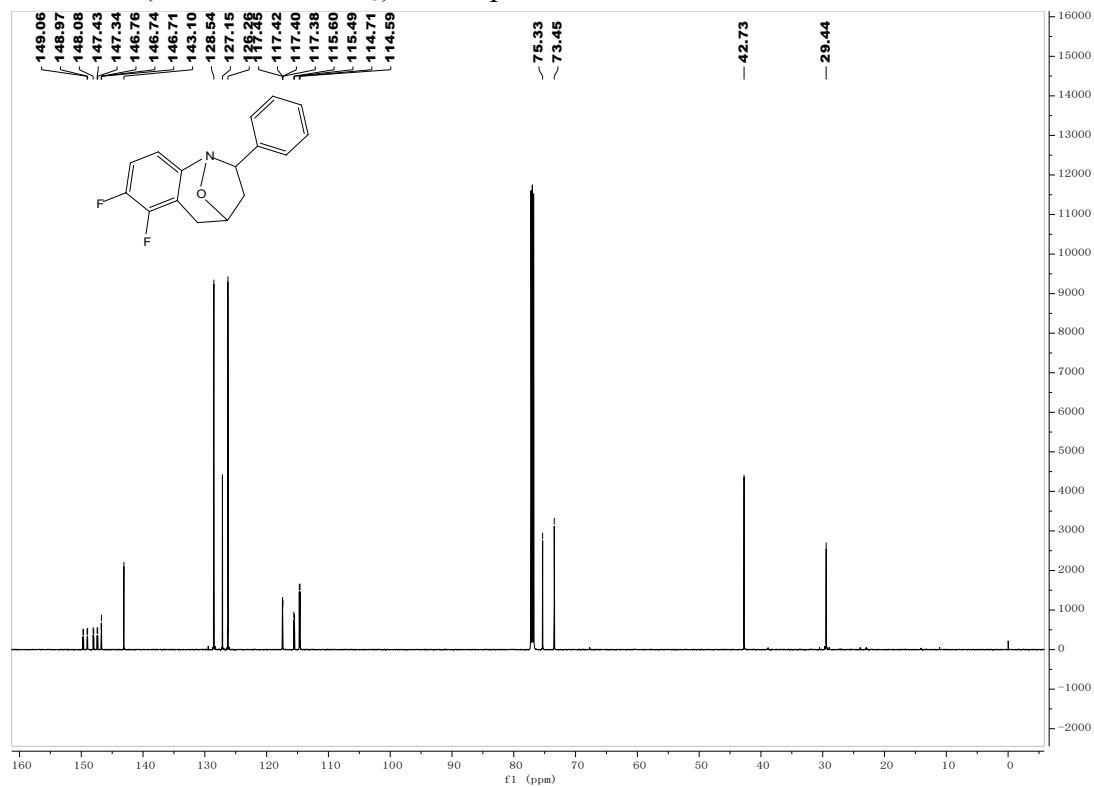

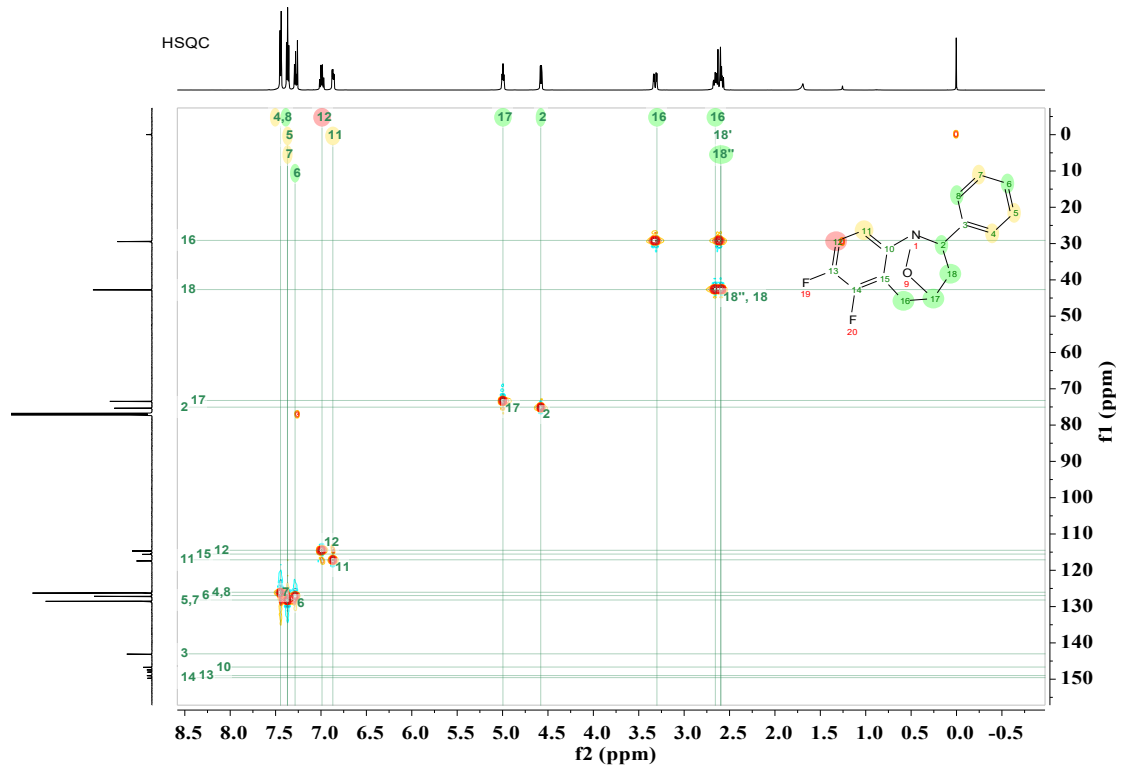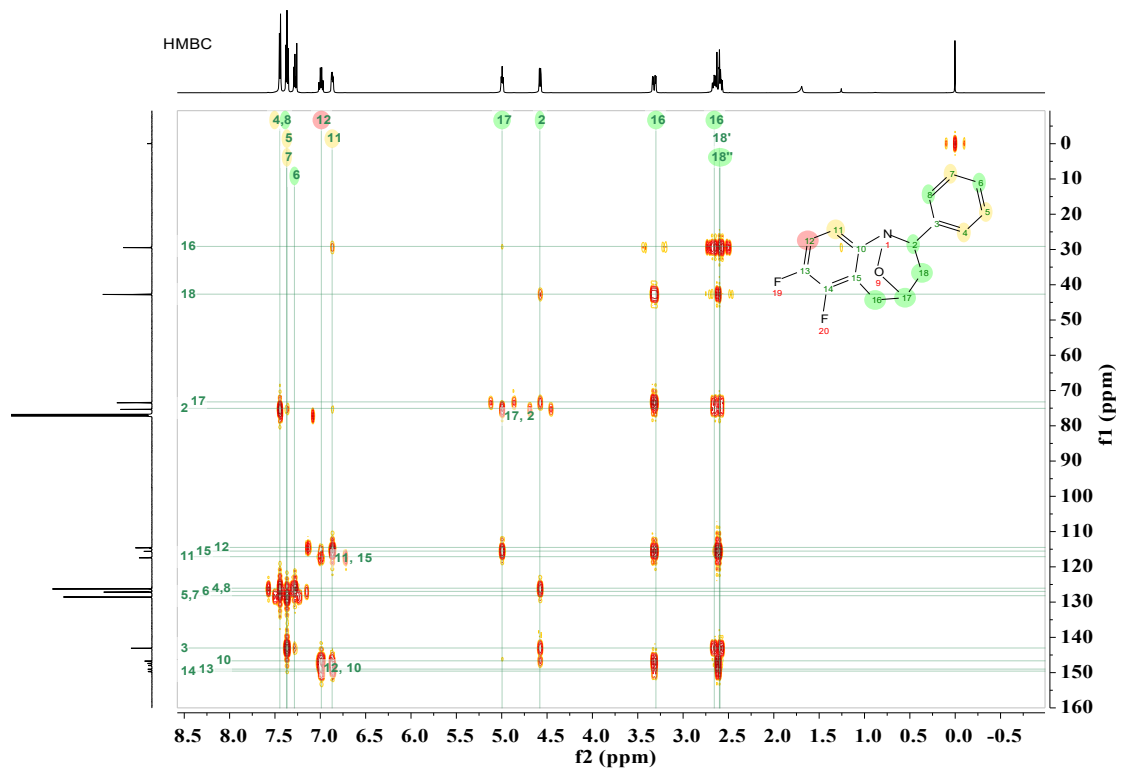

<sup>1</sup>H NMR (600 MHz, CDCl<sub>3</sub>) of compound **3ad**

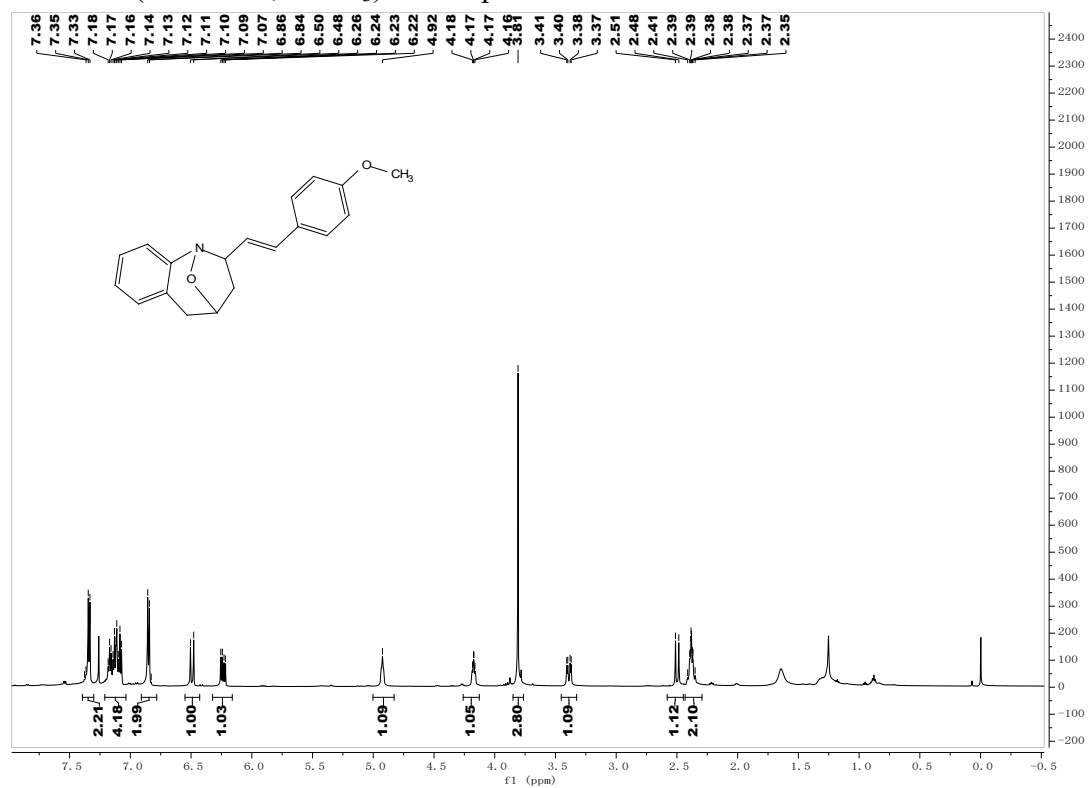

<sup>13</sup>C NMR (151 MHz, CDCl<sub>3</sub>) of compound **3ad**

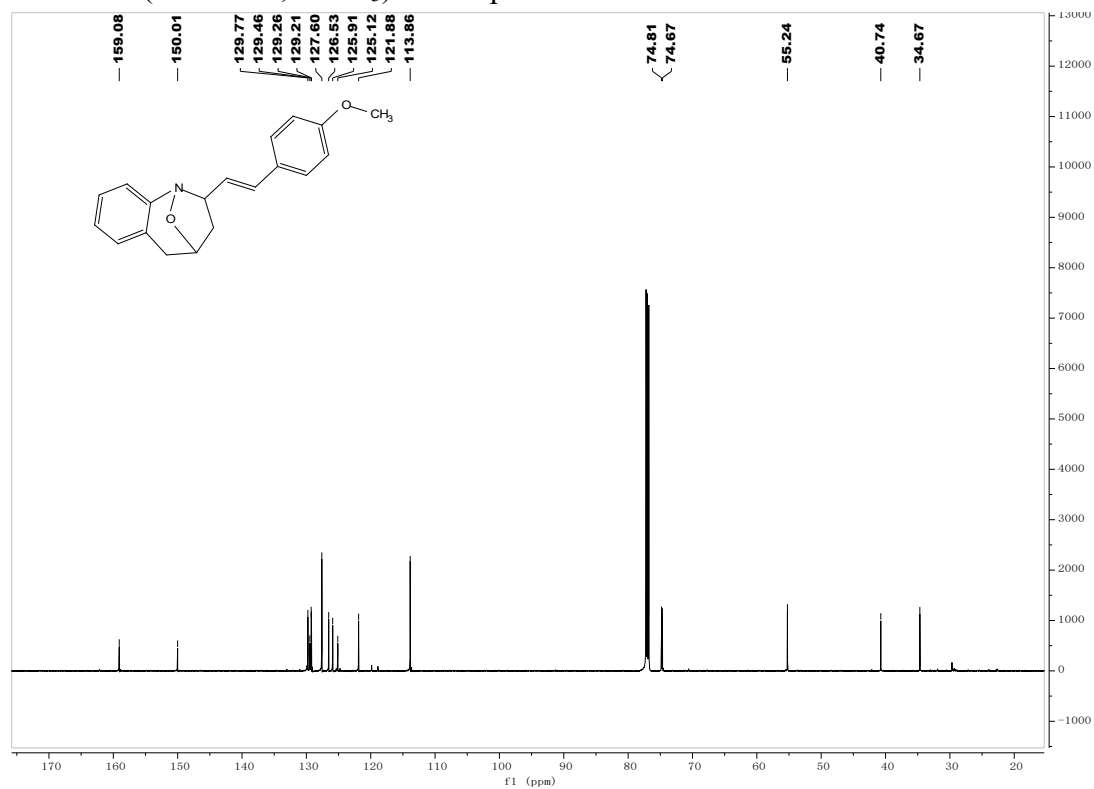



<sup>1</sup>H NMR (600 MHz, CDCl<sub>3</sub>) of compound 3ae

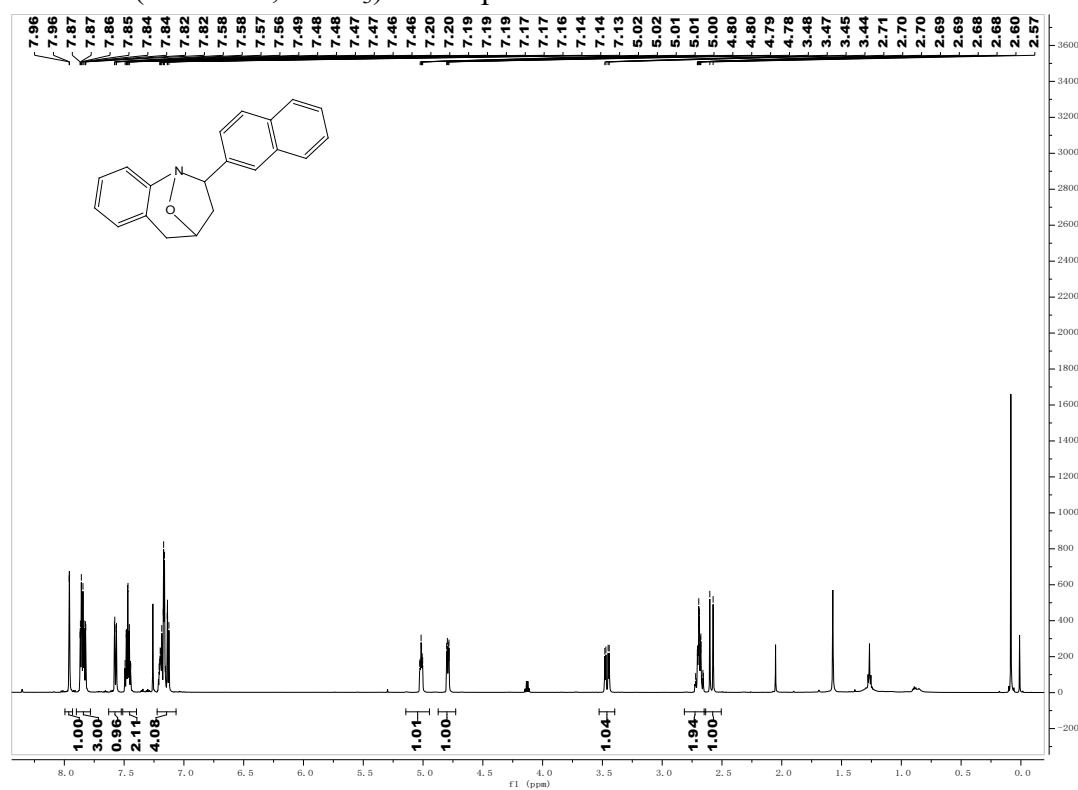

<sup>13</sup>C NMR (151 MHz, CDCl<sub>3</sub>) of compound 3ae

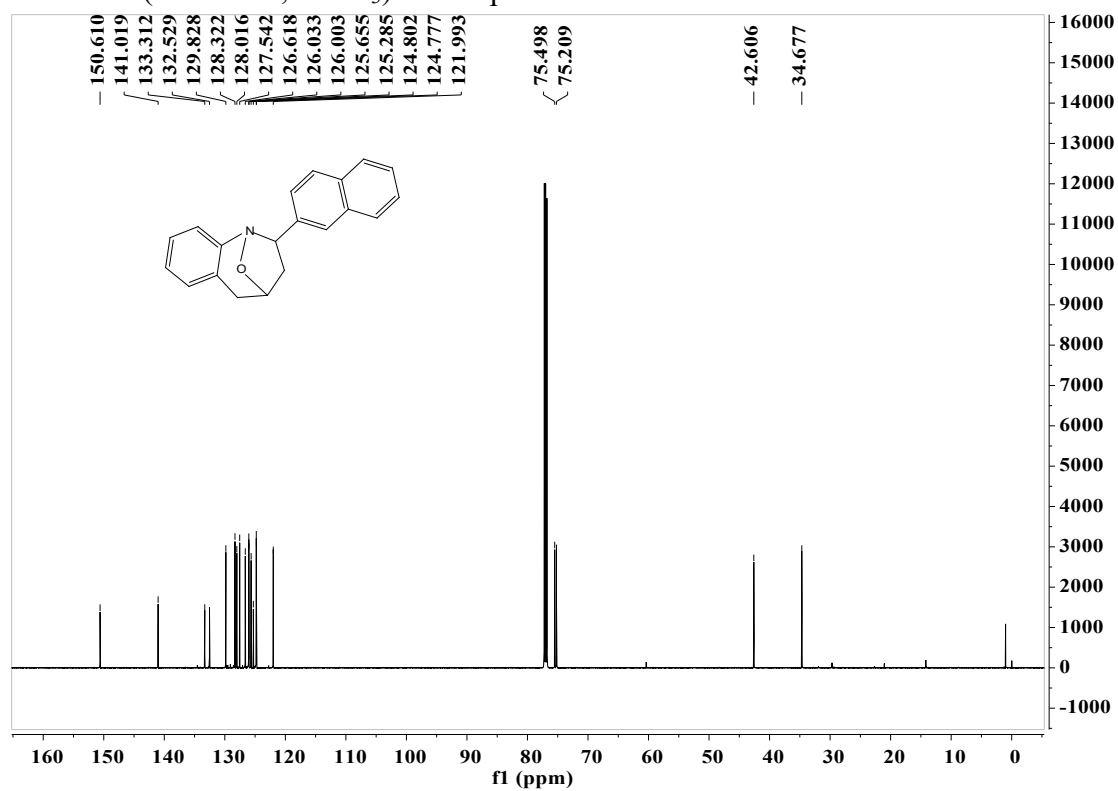



<sup>1</sup>H NMR (600 MHz, CDCl<sub>3</sub>) of compound **3ag**

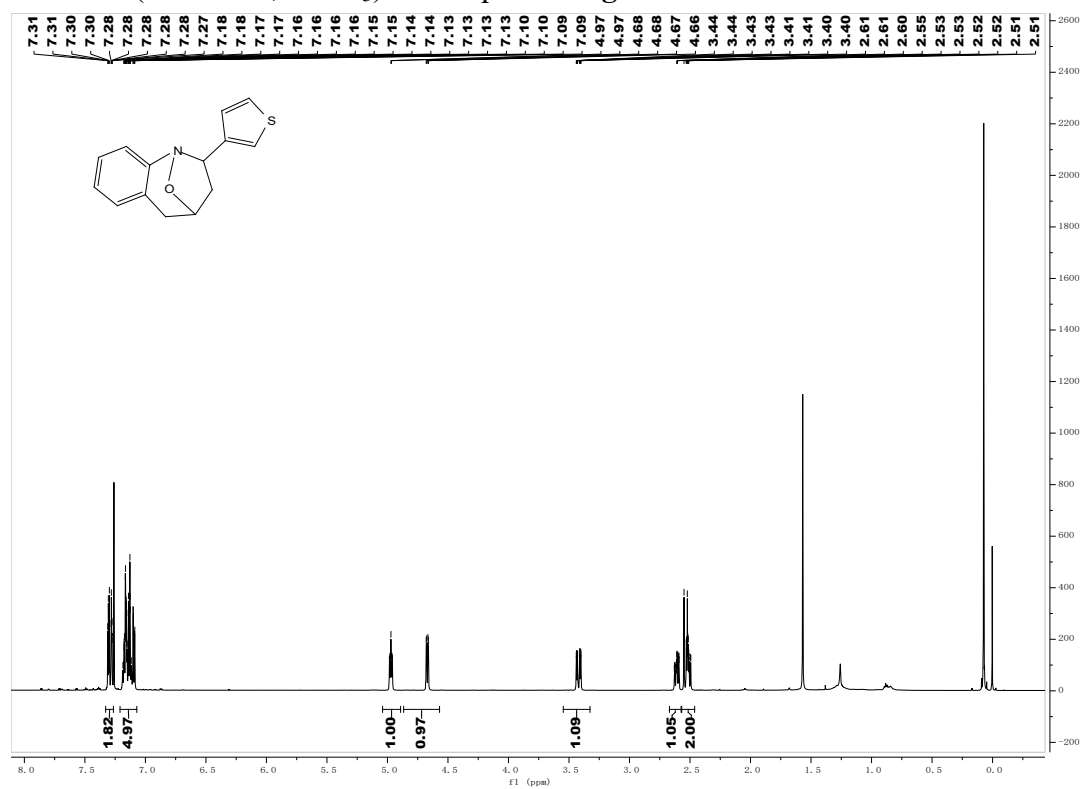

<sup>13</sup>C NMR (151 MHz, CDCl<sub>3</sub>) of compound **3ag**

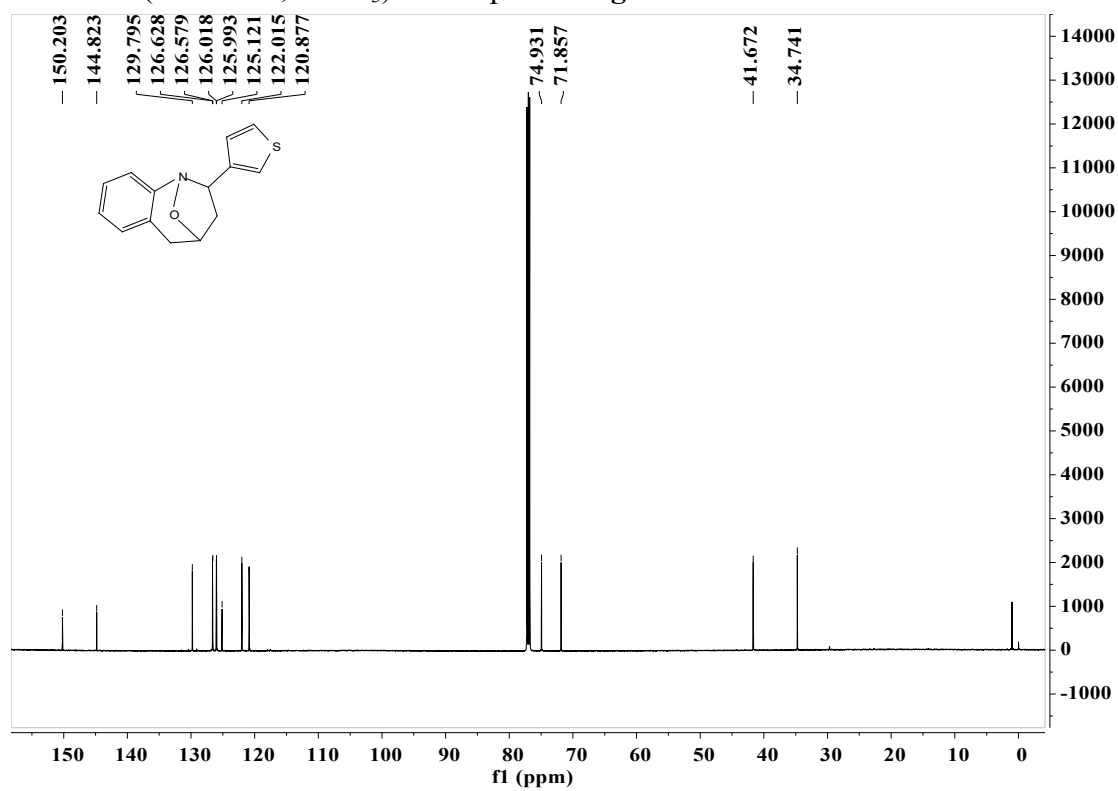

<sup>1</sup>H NMR (600 MHz, CDCl<sub>3</sub>) of compound **5a**

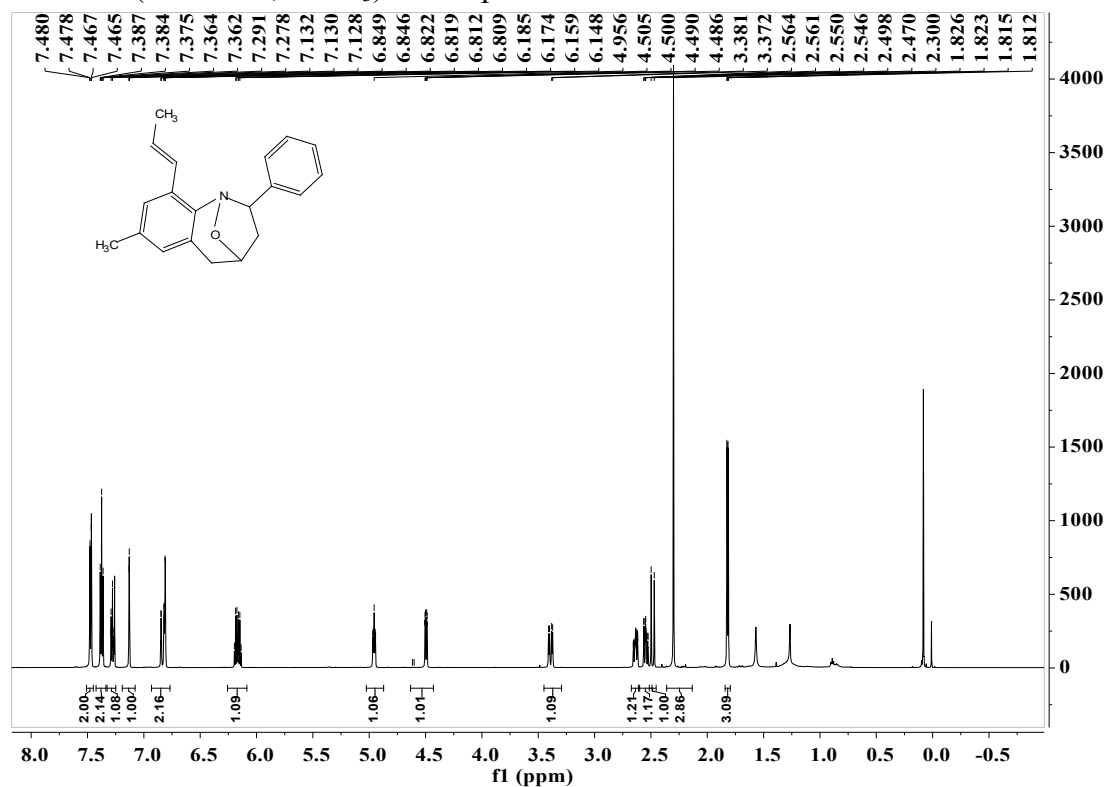

<sup>13</sup>C NMR (151 MHz, CDCl<sub>3</sub>) of compound **5a**

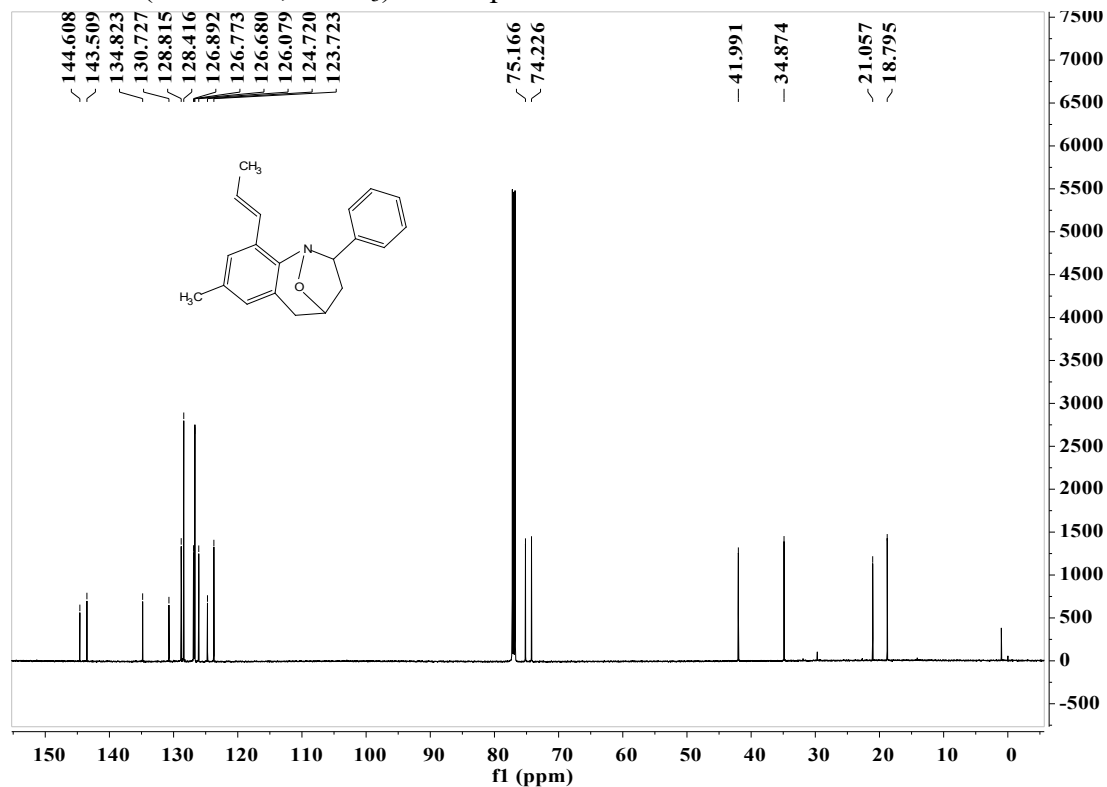

<sup>1</sup>H NMR (600 MHz, CDCl<sub>3</sub>) of compound 4a

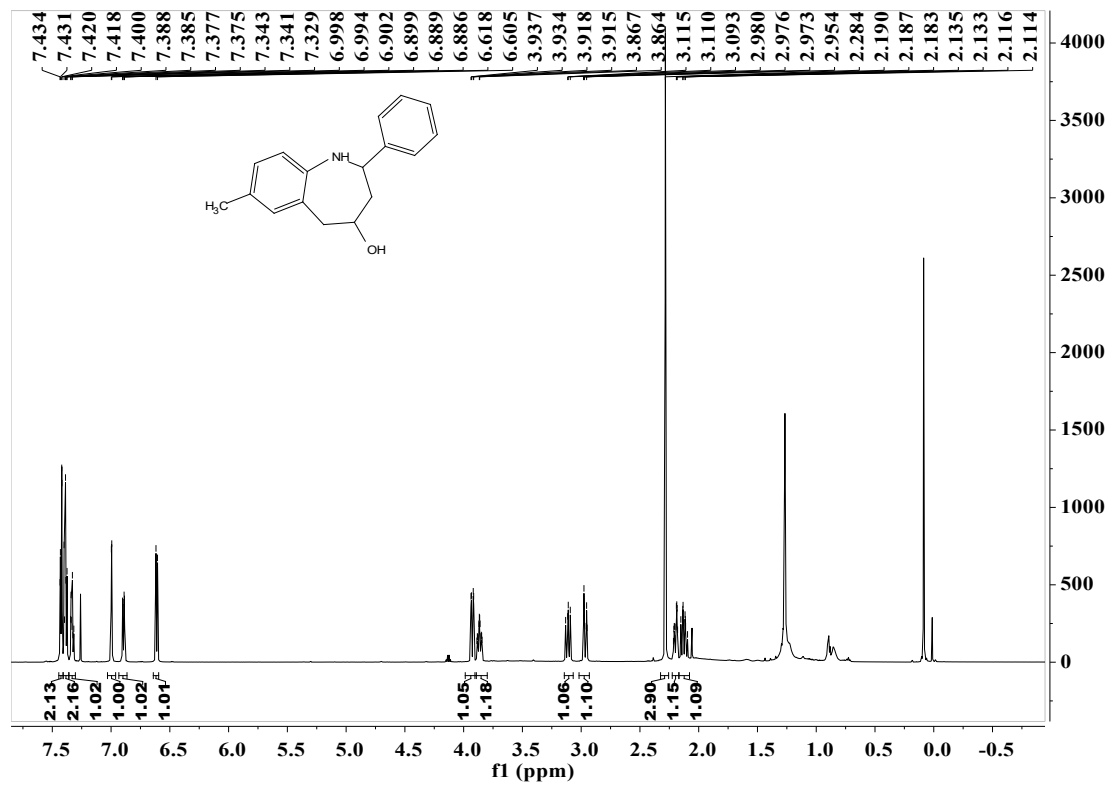

<sup>13</sup>C NMR (151 MHz, CDCl<sub>3</sub>) of compound 4a

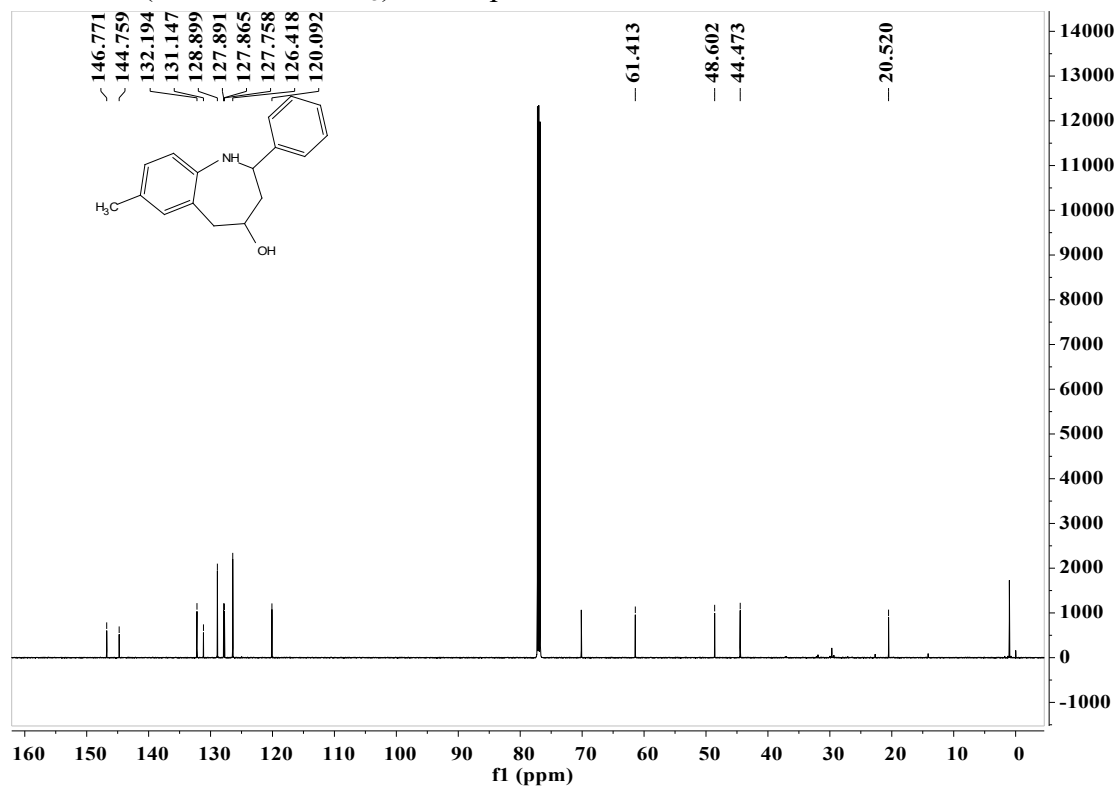

$^1\text{H}$  NMR (600 MHz,  $\text{CDCl}_3$ ) of compound **4f**

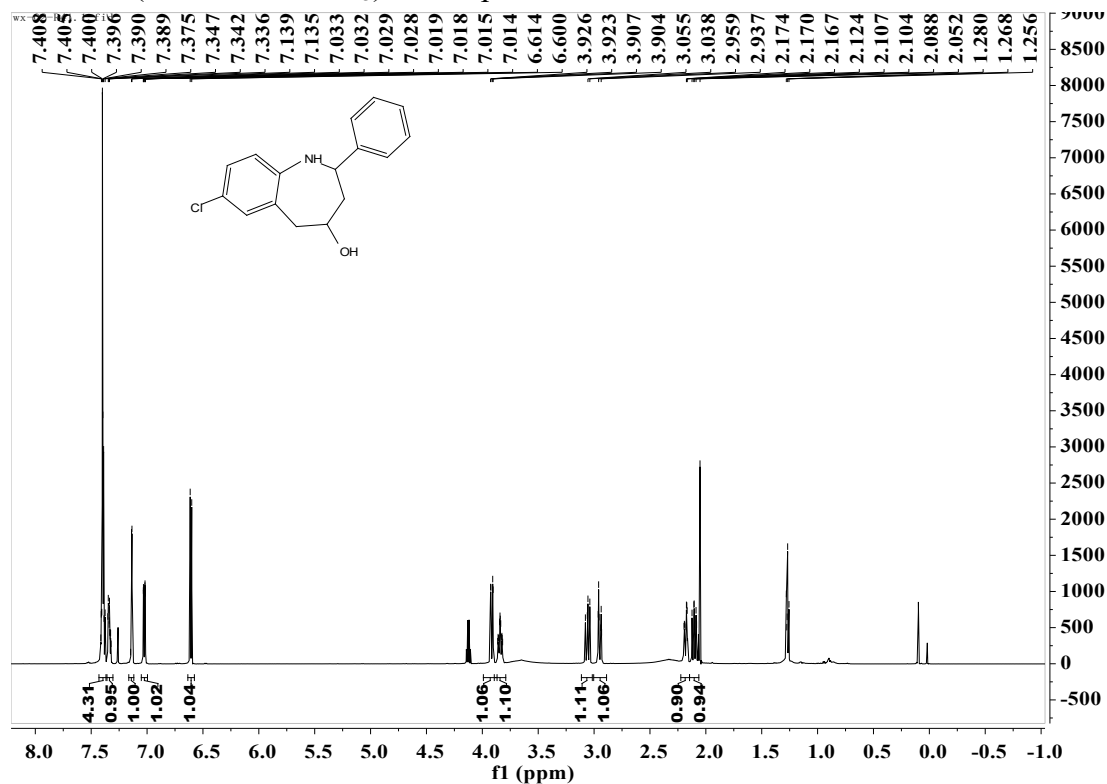

$^{13}\text{C}$  NMR (151 MHz,  $\text{CDCl}_3$ ) of compound **4f**

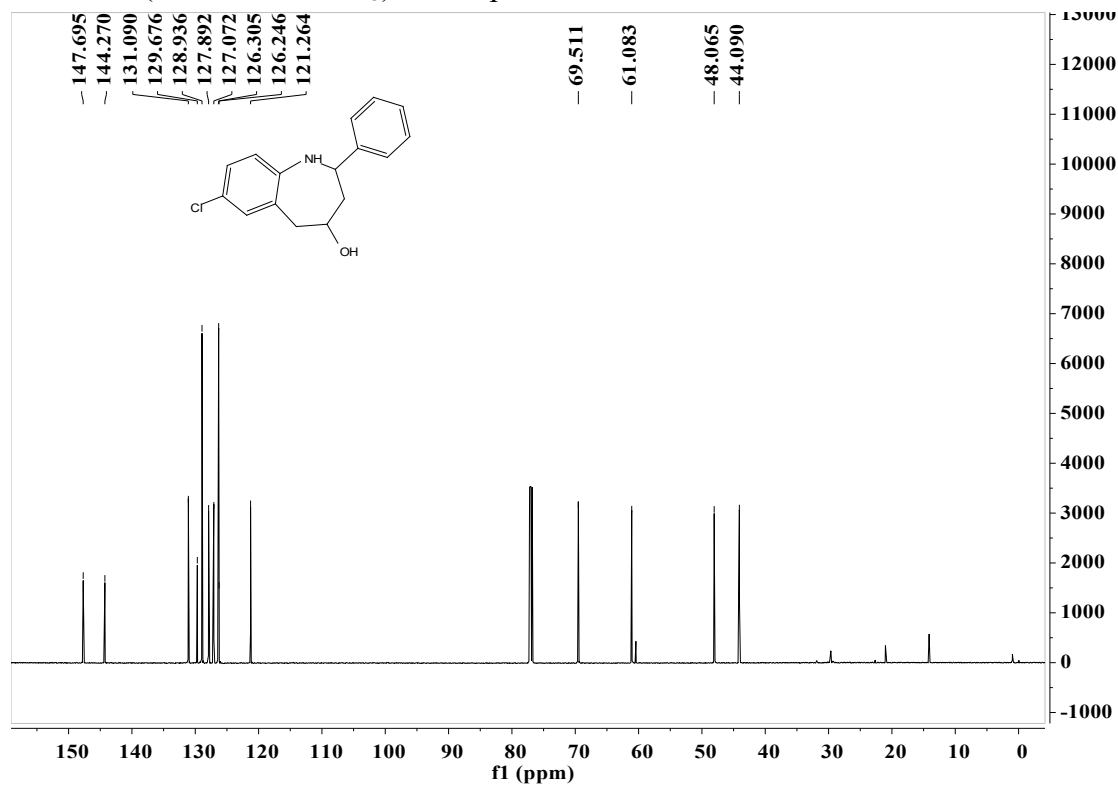

## Crystallographic Data

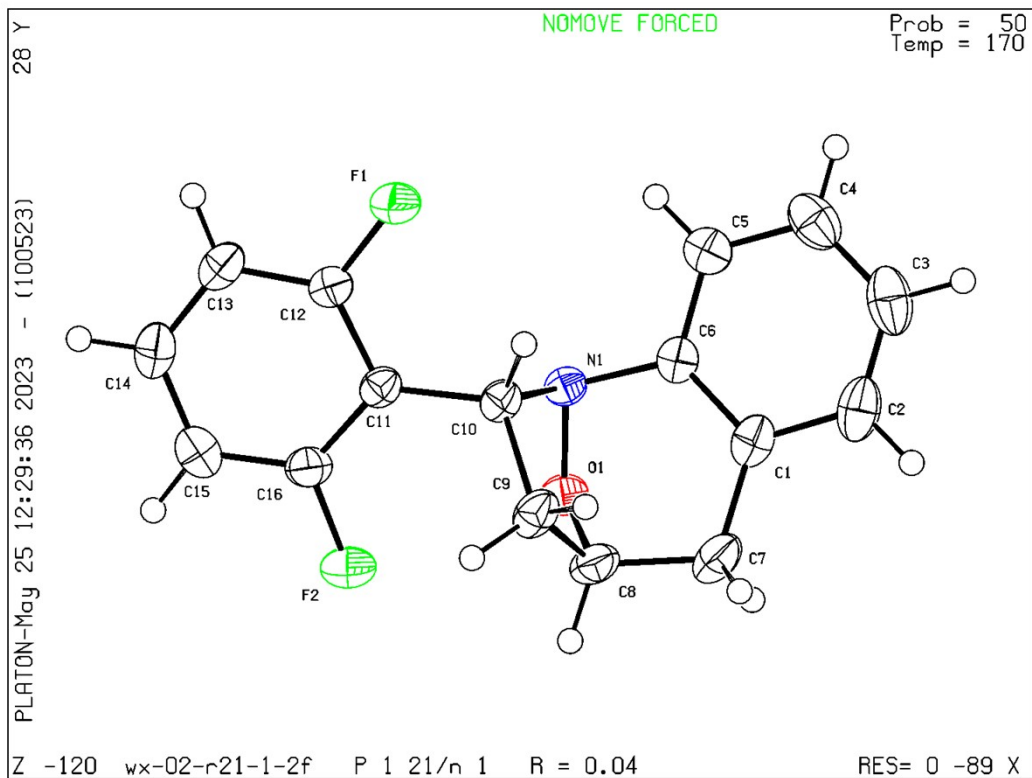

Figure S1. Crystal XRD image of **3w**

**Table S2 Crystal data and structure refinement of **3w**.**

|                                    |                                                   |
|------------------------------------|---------------------------------------------------|
| Identification code                | 3w                                                |
| Empirical formula                  | C <sub>16</sub> H <sub>13</sub> F <sub>2</sub> NO |
| Formula weight                     | 273.27                                            |
| Temperature/K                      | 170.00(18)                                        |
| Crystal system                     | monoclinic                                        |
| Space group                        | P2 <sub>1</sub> /n                                |
| a/Å                                | 10.1690(2)                                        |
| b/Å                                | 10.8560(2)                                        |
| c/Å                                | 12.0502(3)                                        |
| α/°                                | 90                                                |
| β/°                                | 102.790(2)                                        |
| γ/°                                | 90                                                |
| Volume/Å <sup>3</sup>              | 1297.27(5)                                        |
| Z                                  | 4                                                 |
| ρ <sub>calc</sub> /cm <sup>3</sup> | 1.399                                             |

|                                                |                                                               |
|------------------------------------------------|---------------------------------------------------------------|
| $\mu/\text{mm}^{-1}$                           | 0.900                                                         |
| F(000)                                         | 568.0                                                         |
| Crystal size/ $\text{mm}^3$                    | $0.15 \times 0.13 \times 0.1$                                 |
| Radiation                                      | Cu K $\alpha$ ( $\lambda = 1.54184$ )                         |
| 2 $\Theta$ range for data collection/ $^\circ$ | 10.32 to 147.42                                               |
| Index ranges                                   | $-12 \leq h \leq 12, -8 \leq k \leq 13, -14 \leq l \leq 14$   |
| Reflections collected                          | 4569                                                          |
| Independent reflections                        | 2541 [ $R_{\text{int}} = 0.0202, R_{\text{sigma}} = 0.0245$ ] |
| Data/restraints/parameters                     | 2541/0/182                                                    |
| Goodness-of-fit on $F^2$                       | 1.047                                                         |
| Final R indexes [ $I \geq 2\sigma(I)$ ]        | $R_1 = 0.0388, wR_2 = 0.0998$                                 |
| Final R indexes [all data]                     | $R_1 = 0.0428, wR_2 = 0.1028$                                 |
| Largest diff. peak/hole / $e \text{ \AA}^{-3}$ | 0.22/-0.21                                                    |

**Table S3 Fractional Atomic Coordinates ( $\times 10^4$ ) and Equivalent Isotropic Displacement Parameters ( $\text{\AA}^2 \times 10^3$ ) for 3w.  $U_{\text{eq}}$  is defined as 1/3 of the trace of the orthogonalised  $U_{\text{IJ}}$  tensor.**

| Atom | x          | y          | z           | U(eq)   |
|------|------------|------------|-------------|---------|
| F1   | 6018.2(8)  | 3473.4(9)  | 6839.5(7)   | 43.7(3) |
| F2   | 1666.8(9)  | 3950.6(11) | 4534.5(8)   | 52.2(3) |
| O1   | 1446.0(9)  | 3500.1(9)  | 6869.7(8)   | 31.3(2) |
| N1   | 2848.6(10) | 3450.0(10) | 7441.4(9)   | 25.3(3) |
| C1   | 2027.7(14) | 4707.0(12) | 8874.2(12)  | 32.7(3) |
| C2   | 2181.0(17) | 5044.8(14) | 10006.5(14) | 42.9(4) |
| C3   | 3218.3(18) | 4573.6(16) | 10841.6(14) | 47.7(4) |
| C4   | 4130.5(17) | 3756.0(16) | 10558.9(13) | 42.9(4) |
| C5   | 3998.8(14) | 3398.2(13) | 9435.0(13)  | 33.3(3) |
| C6   | 2951.5(13) | 3868.9(11) | 8600.6(11)  | 26.9(3) |
| C7   | 905.1(15)  | 5203.9(14) | 7948.1(14)  | 39.8(4) |
| C8   | 1132.3(14) | 4807.9(14) | 6799.8(13)  | 35.8(3) |
| C9   | 2390.4(14) | 5408.2(13) | 6530.7(13)  | 35.6(3) |
| C10  | 3452.7(12) | 4371.5(12) | 6786.2(11)  | 26.7(3) |
| C11  | 3822.0(12) | 3785.3(11) | 5758.3(11)  | 26.2(3) |
| C12  | 5134.8(13) | 3376.9(12) | 5820.0(12)  | 28.7(3) |
| C13  | 5600.6(14) | 2884.3(13) | 4927.9(13)  | 34.9(3) |
| C14  | 4719.9(15) | 2789.4(13) | 3886.6(13)  | 37.0(3) |
| C15  | 3389.0(16) | 3148.5(15) | 3760.6(13)  | 38.4(3) |
| C16  | 2984.6(13) | 3624.3(13) | 4690.6(12)  | 32.6(3) |



**Table S4 Anisotropic Displacement Parameters ( $\text{\AA}^2 \times 10^3$ ) for 3w. The Anisotropic displacement factor exponent takes the form:  $-2\pi^2[h^2a^{*2}U_{11}+2hka^*b^*U_{12}+\dots]$ .**

| Atom | $U_{11}$ | $U_{22}$ | $U_{33}$ | $U_{23}$ | $U_{13}$ | $U_{12}$ |
|------|----------|----------|----------|----------|----------|----------|
| F1   | 29.5(4)  | 59.8(6)  | 38.3(5)  | -5.1(4)  | -0.3(4)  | 10.2(4)  |
| F2   | 28.9(4)  | 78.6(7)  | 45.0(5)  | -1.5(5)  | -0.9(4)  | 14.0(4)  |
| O1   | 24.5(5)  | 32.2(5)  | 36.4(5)  | 1.1(4)   | 5.1(4)   | -0.6(4)  |
| N1   | 24.0(5)  | 22.9(5)  | 29.2(6)  | 0.8(4)   | 6.1(4)   | 0.9(4)   |
| C1   | 39.6(7)  | 23.6(7)  | 39.6(8)  | -0.9(5)  | 18.6(6)  | -1.8(5)  |
| C2   | 57.4(9)  | 32.3(8)  | 46.3(9)  | -9.0(6)  | 27.4(8)  | -7.6(7)  |
| C3   | 62.5(10) | 48.2(9)  | 35.2(8)  | -11.1(7) | 17.1(7)  | -21.8(8) |
| C4   | 45.4(8)  | 47.1(9)  | 33.4(8)  | 2.1(6)   | 2.8(6)   | -15.0(7) |
| C5   | 32.4(7)  | 32.1(7)  | 35.0(7)  | 3.0(6)   | 6.8(6)   | -4.6(5)  |
| C6   | 30.8(6)  | 21.5(6)  | 30.0(7)  | -0.3(5)  | 10.2(5)  | -4.1(5)  |
| C7   | 40.3(8)  | 34.0(8)  | 51.4(9)  | 5.4(6)   | 23.5(7)  | 10.9(6)  |
| C8   | 30.8(7)  | 35.8(8)  | 42.8(8)  | 8.7(6)   | 12.2(6)  | 11.4(6)  |
| C9   | 42.5(8)  | 26.2(7)  | 43.1(8)  | 7.5(6)   | 20.6(6)  | 9.4(6)   |
| C10  | 27.7(6)  | 23.2(6)  | 30.7(7)  | 0.8(5)   | 9.7(5)   | 0.6(5)   |
| C11  | 26.6(6)  | 22.6(6)  | 30.6(7)  | 2.0(5)   | 9.3(5)   | 1.5(5)   |
| C12  | 26.6(6)  | 28.1(7)  | 31.6(7)  | 1.3(5)   | 6.6(5)   | 1.5(5)   |
| C13  | 33.5(7)  | 32.1(7)  | 43.4(8)  | 1.7(6)   | 17.8(6)  | 4.4(6)   |
| C14  | 49.1(8)  | 31.4(7)  | 35.8(7)  | -1.3(6)  | 20.8(6)  | 0.0(6)   |
| C15  | 45.0(8)  | 39.6(8)  | 29.5(7)  | 0.6(6)   | 5.4(6)   | -2.3(6)  |
| C16  | 26.7(6)  | 36.1(7)  | 34.2(7)  | 3.3(6)   | 5.2(5)   | 4.4(5)   |

**Table S5 Bond Lengths for 3w.**

| <b>Atom</b> | <b>Atom</b> | <b>Length/Å</b> | <b>Atom</b> | <b>Atom</b> | <b>Length/Å</b> |
|-------------|-------------|-----------------|-------------|-------------|-----------------|
| F1          | C12         | 1.3560(15)      | C5          | C6          | 1.3900(19)      |
| F2          | C16         | 1.3584(16)      | C7          | C8          | 1.515(2)        |
| O1          | N1          | 1.4411(14)      | C8          | C9          | 1.5331(19)      |
| O1          | C8          | 1.4535(17)      | C9          | C10         | 1.5431(17)      |
| N1          | C6          | 1.4507(17)      | C10         | C11         | 1.5120(18)      |
| N1          | C10         | 1.4887(16)      | C11         | C12         | 1.3930(18)      |
| C1          | C2          | 1.388(2)        | C11         | C16         | 1.3878(19)      |
| C1          | C6          | 1.3986(18)      | C12         | C13         | 1.375(2)        |
| C1          | C7          | 1.508(2)        | C13         | C14         | 1.375(2)        |
| C2          | C3          | 1.385(3)        | C14         | C15         | 1.384(2)        |
| C3          | C4          | 1.380(3)        | C15         | C16         | 1.377(2)        |
| C4          | C5          | 1.387(2)        |             |             |                 |

**Table S6 Bond Angles for 3w.**

| <b>Atom Atom Atom</b> | <b>Angle/°</b> | <b>Atom Atom Atom</b> | <b>Angle/°</b> |
|-----------------------|----------------|-----------------------|----------------|
| N1 O1 C8              | 104.24(9)      | C7 C8 C9              | 112.07(13)     |
| O1 N1 C6              | 107.53(9)      | C8 C9 C10             | 103.17(11)     |
| O1 N1 C10             | 101.66(9)      | N1 C10 C9             | 104.07(10)     |
| C6 N1 C10             | 110.47(10)     | N1 C10 C11            | 110.98(10)     |
| C2 C1 C6              | 117.94(14)     | C11 C10 C9            | 115.68(11)     |
| C2 C1 C7              | 122.32(14)     | C12 C11 C10           | 119.94(12)     |
| C6 C1 C7              | 119.74(13)     | C16 C11 C10           | 126.85(11)     |
| C3 C2 C1              | 121.23(15)     | C16 C11 C12           | 113.17(12)     |
| C4 C3 C2              | 120.25(15)     | F1 C12 C11            | 117.30(12)     |
| C3 C4 C5              | 119.77(15)     | F1 C12 C13            | 117.68(12)     |
| C4 C5 C6              | 119.76(14)     | C13 C12 C11           | 125.02(13)     |
| C1 C6 N1              | 121.46(12)     | C14 C13 C12           | 118.37(13)     |
| C5 C6 N1              | 117.49(12)     | C13 C14 C15           | 120.17(13)     |
| C5 C6 C1              | 121.05(13)     | C16 C15 C14           | 118.51(14)     |
| C1 C7 C8              | 109.32(11)     | F2 C16 C11            | 118.66(12)     |
| O1 C8 C7              | 107.46(11)     | F2 C16 C15            | 116.64(13)     |
| O1 C8 C9              | 104.16(10)     | C15 C16 C11           | 124.70(13)     |

**Table S7 Torsion Angles for 3w.**

| A  | B   | C   | D   | Angle/°     | A   | B   | C   | D   | Angle/°     |
|----|-----|-----|-----|-------------|-----|-----|-----|-----|-------------|
| F1 | C12 | C13 | C14 | -179.50(12) | C7  | C1  | C6  | N1  | -0.73(19)   |
| O1 | N1  | C6  | C1  | -28.56(15)  | C7  | C1  | C6  | C5  | 179.80(13)  |
| O1 | N1  | C6  | C5  | 150.93(11)  | C7  | C8  | C9  | C10 | 101.55(13)  |
| O1 | N1  | C10 | C9  | 38.15(12)   | C8  | O1  | N1  | C6  | 67.32(11)   |
| O1 | N1  | C10 | C11 | -86.93(11)  | C8  | O1  | N1  | C10 | -48.76(11)  |
| O1 | C8  | C9  | C10 | -14.32(14)  | C8  | C9  | C10 | N1  | -14.38(14)  |
| N1 | O1  | C8  | C7  | -79.73(12)  | C8  | C9  | C10 | C11 | 107.64(13)  |
| N1 | O1  | C8  | C9  | 39.33(13)   | C9  | C10 | C11 | C12 | 145.91(12)  |
| N1 | C10 | C11 | C12 | -95.83(14)  | C9  | C10 | C11 | C16 | -31.96(19)  |
| N1 | C10 | C11 | C16 | 86.29(16)   | C10 | N1  | C6  | C1  | 81.57(14)   |
| C1 | C2  | C3  | C4  | 0.3(2)      | C10 | N1  | C6  | C5  | -98.94(13)  |
| C1 | C7  | C8  | O1  | 47.17(15)   | C10 | C11 | C12 | F1  | 3.24(18)    |
| C1 | C7  | C8  | C9  | -66.68(15)  | C10 | C11 | C12 | C13 | -176.80(13) |
| C2 | C1  | C6  | N1  | 178.83(12)  | C10 | C11 | C16 | F2  | -4.1(2)     |
| C2 | C1  | C6  | C5  | -0.6(2)     | C10 | C11 | C16 | C15 | 176.06(13)  |
| C2 | C1  | C7  | C8  | 171.90(13)  | C11 | C12 | C13 | C14 | 0.5(2)      |
| C2 | C3  | C4  | C5  | -0.6(2)     | C12 | C11 | C16 | F2  | 177.87(12)  |
| C3 | C4  | C5  | C6  | 0.2(2)      | C12 | C11 | C16 | C15 | -1.9(2)     |
| C4 | C5  | C6  | N1  | -179.10(12) | C12 | C13 | C14 | C15 | -2.0(2)     |
| C4 | C5  | C6  | C1  | 0.4(2)      | C13 | C14 | C15 | C16 | 1.5(2)      |
| C6 | N1  | C10 | C9  | -75.76(13)  | C14 | C15 | C16 | F2  | -179.18(13) |
| C6 | N1  | C10 | C11 | 159.16(10)  | C14 | C15 | C16 | C11 | 0.6(2)      |
| C6 | C1  | C2  | C3  | 0.3(2)      | C16 | C11 | C12 | F1  | -178.61(12) |
| C6 | C1  | C7  | C8  | -8.56(19)   | C16 | C11 | C12 | C13 | 1.3(2)      |
| C7 | C1  | C2  | C3  | 179.85(14)  |     |     |     |     |             |

**Table S8 Hydrogen Atom Coordinates ( $\text{\AA}\times 10^4$ ) and Isotropic Displacement Parameters ( $\text{\AA}^2\times 10^3$ ) for 3w.**

| <b>Atom</b> | <b><i>x</i></b> | <b><i>y</i></b> | <b><i>z</i></b> | <b>U(eq)</b> |
|-------------|-----------------|-----------------|-----------------|--------------|
| H2          | 1562.54         | 5609.93         | 10212.4         | 51           |
| H3          | 3302.38         | 4814.09         | 11612.16        | 57           |
| H4          | 4846.08         | 3439.32         | 11132.29        | 51           |
| H5          | 4622.14         | 2833.39         | 9235.97         | 40           |
| H7A         | 886.27          | 6114.21         | 7990.47         | 48           |
| H7B         | 27.15           | 4885.99         | 8050.43         | 48           |
| H8          | 317.36          | 4977.26         | 6183.17         | 43           |
| H9A         | 2677.09         | 6133.71         | 7022.61         | 43           |
| H9B         | 2226            | 5665.72         | 5723.59         | 43           |
| H10         | 4290.55         | 4708.23         | 7290.83         | 32           |
| H13         | 6508.65         | 2616.28         | 5028.76         | 42           |
| H14         | 5025.58         | 2476.54         | 3251.73         | 44           |
| H15         | 2768.42         | 3068.44         | 3048.46         | 46           |

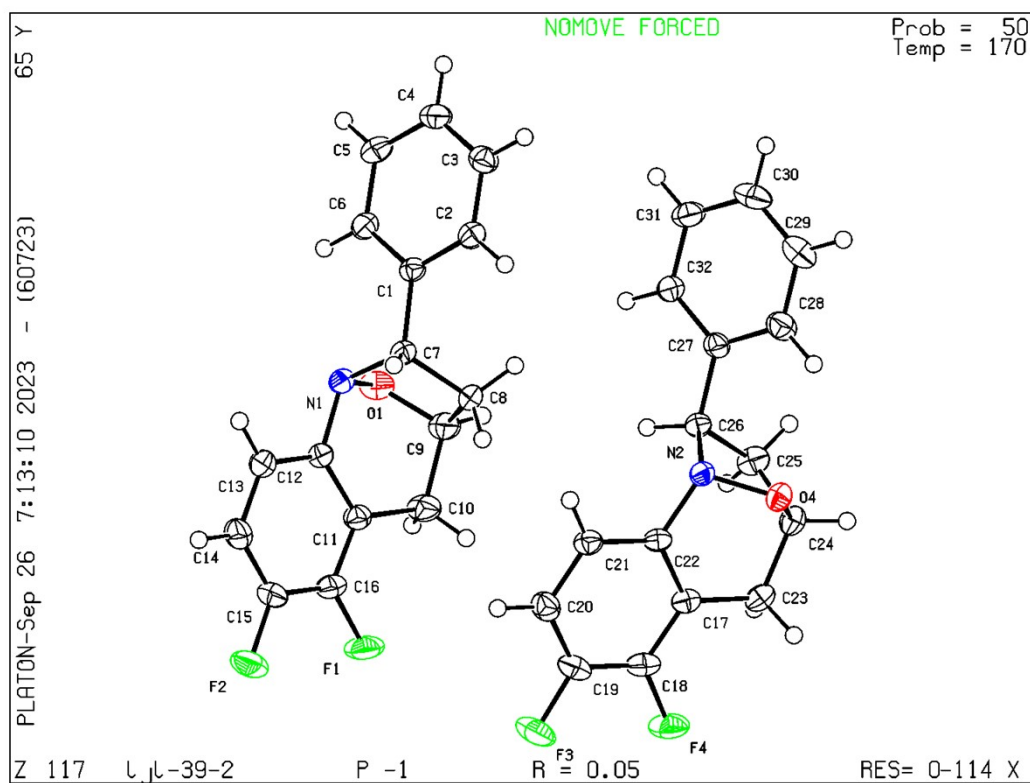

Figure S2. Crystal XRD image of **3ac**

**Table S9** Crystal data and structure refinement for **3ac**.

|                                         |                                                   |
|-----------------------------------------|---------------------------------------------------|
| Identification code                     | 3ac                                               |
| Empirical formula                       | C <sub>16</sub> H <sub>13</sub> F <sub>2</sub> NO |
| Formula weight                          | 273.27                                            |
| Temperature/K                           | 170.00(10)                                        |
| Crystal system                          | triclinic                                         |
| Space group                             | P-1                                               |
| a/Å                                     | 9.7065(3)                                         |
| b/Å                                     | 11.7198(4)                                        |
| c/Å                                     | 12.0290(4)                                        |
| $\alpha$ /°                             | 77.710(3)                                         |
| $\beta$ /°                              | 89.322(3)                                         |
| $\gamma$ /°                             | 71.433(3)                                         |
| Volume/Å <sup>3</sup>                   | 1265.13(8)                                        |
| Z                                       | 4                                                 |
| $\rho_{\text{calc}}$ /g/cm <sup>3</sup> | 1.435                                             |
| $\mu$ /mm <sup>-1</sup>                 | 0.923                                             |
| F(000)                                  | 568.0                                             |

|                                             |                                                               |
|---------------------------------------------|---------------------------------------------------------------|
| Crystal size/mm <sup>3</sup>                | 0.17 × 0.14 × 0.12                                            |
| Radiation                                   | Cu Kα (λ = 1.54184)                                           |
| 2θ range for data collection/°              | 7.536 to 147.088                                              |
| Index ranges                                | -10 ≤ h ≤ 12, -13 ≤ k ≤ 14, -14 ≤ l ≤ 14                      |
| Reflections collected                       | 8430                                                          |
| Independent reflections                     | 4941 [R <sub>int</sub> = 0.0289, R <sub>sigma</sub> = 0.0300] |
| Data/restraints/parameters                  | 4941/0/361                                                    |
| Goodness-of-fit on F <sup>2</sup>           | 1.059                                                         |
| Final R indexes [I ≥ 2σ (I)]                | R <sub>1</sub> = 0.0517, wR <sub>2</sub> = 0.1352             |
| Final R indexes [all data]                  | R <sub>1</sub> = 0.0557, wR <sub>2</sub> = 0.1391             |
| Largest diff. peak/hole / e Å <sup>-3</sup> | 0.30/-0.45                                                    |

**Table S10 Fractional Atomic Coordinates ( $\times 10^4$ ) and Equivalent Isotropic Displacement Parameters ( $\text{\AA}^2 \times 10^3$ ) for 3ac.  $U_{\text{eq}}$  is defined as 1/3 of the trace of the orthogonalised  $U_{ij}$  tensor.**

| Atom | x           | y           | z           | U(eq)   |
|------|-------------|-------------|-------------|---------|
| F1   | 11190.3(11) | 4985.4(9)   | 8606.9(10)  | 44.2(3) |
| F2   | 13256.3(11) | 4967.1(9)   | 10075.0(10) | 43.1(3) |
| O1   | 7001.8(11)  | 8498.2(10)  | 8864.5(10)  | 29.5(3) |
| N1   | 8134.3(12)  | 8929.4(11)  | 9204.6(10)  | 22.3(3) |
| C1   | 6921.8(14)  | 11081.1(13) | 8162.1(12)  | 20.9(3) |
| C2   | 6718.8(16)  | 12047.3(13) | 7209.7(13)  | 24.5(3) |
| C3   | 5613.5(16)  | 13158.2(14) | 7137.2(13)  | 28.0(3) |
| C4   | 4691.7(16)  | 13329.3(14) | 8019.1(14)  | 29.3(3) |
| C5   | 4882.0(16)  | 12376.7(15) | 8970.2(14)  | 29.3(3) |
| C6   | 5989.0(16)  | 11258.6(14) | 9043.9(13)  | 25.3(3) |
| C7   | 8143.8(14)  | 9883.6(13)  | 8185.7(12)  | 21.4(3) |
| C8   | 7991.6(18)  | 9274.4(14)  | 7195.2(13)  | 30.5(3) |
| C9   | 7401.1(17)  | 8237.7(15)  | 7758.4(15)  | 31.9(4) |
| C10  | 8543.9(17)  | 6963.7(14)  | 7972.8(15)  | 32.5(4) |
| C11  | 9678.3(16)  | 6931.3(13)  | 8834.5(13)  | 24.6(3) |
| C12  | 9483.2(15)  | 7909.1(13)  | 9380.9(12)  | 22.8(3) |
| C13  | 10565.0(17) | 7920.0(14)  | 10115.6(13) | 29.1(3) |
| C14  | 11852.9(18) | 6936.2(15)  | 10351.7(14) | 32.3(4) |
| C15  | 12027.8(16) | 5950.7(14)  | 9850.4(14)  | 29.6(3) |
| C16  | 10961.4(17) | 5953.4(14)  | 9102.0(14)  | 28.2(3) |
| F3   | 12598.2(12) | 4926.0(9)   | 5710.0(10)  | 47.0(3) |
| F4   | 10982.8(11) | 5046.5(8)   | 3877.0(10)  | 41.8(3) |
| O4   | 8741.9(11)  | 9378.1(9)   | 2250.6(8)   | 24.6(2) |
| N2   | 8813.7(12)  | 9446.1(11)  | 3436.5(10)  | 21.0(3) |
| C17  | 9819.7(15)  | 7186.5(13)  | 3664.3(13)  | 24.0(3) |
| C18  | 10821.2(17) | 6092.6(13)  | 4242.8(14)  | 29.5(3) |
| C19  | 11648.1(16) | 6032.5(14)  | 5186.4(15)  | 31.0(3) |
| C20  | 11520.4(16) | 7070.0(15)  | 5595.0(14)  | 29.2(3) |
| C21  | 10563.1(15) | 8191.9(13)  | 5013.3(13)  | 24.6(3) |
| C22  | 9734.9(14)  | 8248.5(13)  | 4057.2(12)  | 21.5(3) |
| C23  | 8892.9(17)  | 7241.4(14)  | 2653.4(13)  | 28.1(3) |
| C24  | 7897.1(16)  | 8558.3(14)  | 2223.5(13)  | 26.2(3) |
| C25  | 6667.2(16)  | 8976.8(14)  | 3007.7(14)  | 28.7(3) |
| C26  | 7260.8(14)  | 9684.2(13)  | 3732.2(12)  | 21.6(3) |
| C27  | 6427.4(14)  | 11053.8(13) | 3490.1(12)  | 22.7(3) |
| C28  | 6420.2(17)  | 11829.6(15) | 2435.1(14)  | 30.6(3) |



**Table S10 Fractional Atomic Coordinates ( $\times 10^4$ ) and Equivalent Isotropic Displacement Parameters ( $\text{\AA}^2 \times 10^3$ ) for 3ac.  $U_{\text{eq}}$  is defined as 1/3 of the trace of the orthogonalised  $U_{\text{ij}}$  tensor.**

| <b>Atom</b> | <b><i>x</i></b> | <b><i>y</i></b> | <b><i>z</i></b> | <b>U(eq)</b> |
|-------------|-----------------|-----------------|-----------------|--------------|
| C29         | 5569.5(18)      | 13065.4(15)     | 2217.1(15)      | 35.4(4)      |
| C30         | 4708.5(17)      | 13541.1(14)     | 3047.1(16)      | 34.8(4)      |
| C31         | 4716.0(17)      | 12784.2(15)     | 4098.4(15)      | 33.0(4)      |
| C32         | 5571.1(16)      | 11546.1(14)     | 4318.1(13)      | 27.1(3)      |

**Table S11 Anisotropic Displacement Parameters ( $\text{\AA}^2 \times 10^3$ ) for 3ac. The Anisotropic displacement factor exponent takes the form:  $-2\pi^2[h^2a^{*2}U_{11}+2hka^*b^*U_{12}+\dots]$ .**

| Atom | $U_{11}$ | $U_{22}$ | $U_{33}$ | $U_{23}$ | $U_{13}$ | $U_{12}$ |
|------|----------|----------|----------|----------|----------|----------|
| F1   | 42.4(6)  | 27.6(5)  | 60.4(7)  | -25.8(5) | -5.7(5)  | 2.3(4)   |
| F2   | 31.1(5)  | 32.5(5)  | 52.9(7)  | -8.3(5)  | -8.1(4)  | 6.9(4)   |
| O1   | 22.1(5)  | 28.3(5)  | 40.5(6)  | -9.1(5)  | 5.9(4)   | -10.8(4) |
| N1   | 23.0(6)  | 21.9(6)  | 22.3(6)  | -7.2(5)  | 2.0(4)   | -6.2(5)  |
| C1   | 19.1(6)  | 21.0(7)  | 24.3(7)  | -8.5(5)  | 0.2(5)   | -6.5(5)  |
| C2   | 24.7(7)  | 25.1(7)  | 24.6(7)  | -6.8(6)  | 3.6(5)   | -8.6(6)  |
| C3   | 29.0(7)  | 22.1(7)  | 31.2(8)  | -4.4(6)  | -2.5(6)  | -6.8(6)  |
| C4   | 24.0(7)  | 24.4(7)  | 38.3(9)  | -11.9(6) | -2.1(6)  | -2.8(6)  |
| C5   | 26.0(7)  | 31.2(8)  | 33.2(8)  | -14.6(6) | 8.3(6)   | -7.9(6)  |
| C6   | 27.9(7)  | 25.2(7)  | 23.9(7)  | -7.8(6)  | 3.8(6)   | -8.7(6)  |
| C7   | 21.2(6)  | 21.9(7)  | 21.5(7)  | -6.4(5)  | 3.8(5)   | -6.5(5)  |
| C8   | 40.3(8)  | 25.9(7)  | 19.5(7)  | -8.4(6)  | -0.5(6)  | -0.5(6)  |
| C9   | 26.6(7)  | 29.8(8)  | 40.3(9)  | -16.3(7) | -7.9(6)  | -4.6(6)  |
| C10  | 31.3(8)  | 24.5(8)  | 44.5(10) | -15.3(7) | -6.0(7)  | -7.5(6)  |
| C11  | 25.6(7)  | 21.4(7)  | 26.8(7)  | -7.4(5)  | 0.8(6)   | -6.4(6)  |
| C12  | 25.5(7)  | 20.6(7)  | 21.3(7)  | -5.5(5)  | 2.2(5)   | -5.4(5)  |
| C13  | 33.9(8)  | 25.5(7)  | 26.9(8)  | -9.0(6)  | -4.9(6)  | -5.9(6)  |
| C14  | 30.5(8)  | 32.7(8)  | 30.8(8)  | -7.1(6)  | -8.2(6)  | -5.7(6)  |
| C15  | 24.8(7)  | 24.4(7)  | 32.6(8)  | -3.9(6)  | -1.4(6)  | 0.3(6)   |
| C16  | 31.0(8)  | 21.1(7)  | 32.4(8)  | -11.2(6) | 3.4(6)   | -4.9(6)  |
| F3   | 41.7(6)  | 26.5(5)  | 57.1(7)  | 1.0(5)   | -10.0(5) | 4.4(4)   |
| F4   | 46.2(6)  | 20.6(5)  | 58.1(7)  | -16.4(4) | 2.1(5)   | -5.0(4)  |
| O4   | 28.0(5)  | 27.1(5)  | 21.2(5)  | -7.0(4)  | 4.7(4)   | -11.5(4) |
| N2   | 20.1(6)  | 21.7(6)  | 20.9(6)  | -6.5(4)  | 1.6(4)   | -5.3(4)  |
| C17  | 23.5(7)  | 21.2(7)  | 27.9(8)  | -7.5(6)  | 5.7(6)   | -6.7(5)  |
| C18  | 28.6(7)  | 19.4(7)  | 39.8(9)  | -9.5(6)  | 7.6(6)   | -5.3(6)  |
| C19  | 24.3(7)  | 22.2(7)  | 38.8(9)  | -1.1(6)  | 0.3(6)   | -0.6(6)  |
| C20  | 23.3(7)  | 31.6(8)  | 29.6(8)  | -4.3(6)  | -1.3(6)  | -5.9(6)  |
| C21  | 20.9(6)  | 24.0(7)  | 28.8(8)  | -8.8(6)  | 2.0(5)   | -5.4(5)  |
| C22  | 17.9(6)  | 20.0(7)  | 26.5(7)  | -7.1(5)  | 4.1(5)   | -5.0(5)  |
| C23  | 32.8(8)  | 26.2(7)  | 29.9(8)  | -13.8(6) | 4.3(6)   | -10.9(6) |
| C24  | 29.4(7)  | 29.0(8)  | 24.3(7)  | -10.0(6) | 0.4(6)   | -12.2(6) |
| C25  | 24.0(7)  | 30.6(8)  | 36.4(8)  | -13.1(6) | 3.2(6)   | -12.0(6) |
| C26  | 19.4(6)  | 22.0(7)  | 23.0(7)  | -5.9(5)  | 2.7(5)   | -5.5(5)  |
| C27  | 18.0(6)  | 23.5(7)  | 25.6(7)  | -6.6(5)  | -3.4(5)  | -4.4(5)  |
| C28  | 25.9(7)  | 29.4(8)  | 31.1(8)  | -2.2(6)  | 1.0(6)   | -4.3(6)  |

**Table S11 Anisotropic Displacement Parameters ( $\text{\AA}^2 \times 10^3$ ) for 3ac. The Anisotropic displacement factor exponent takes the form:  $-2\pi^2[h^2a^{*2}U_{11}+2hka^*b^*U_{12}+\dots]$ .**

| Atom | $U_{11}$ | $U_{22}$ | $U_{33}$ | $U_{23}$ | $U_{13}$ | $U_{12}$ |
|------|----------|----------|----------|----------|----------|----------|
| C29  | 30.9(8)  | 28.8(8)  | 40.2(9)  | 3.5(7)   | -4.7(7)  | -7.7(7)  |
| C30  | 27.0(7)  | 19.7(7)  | 54.8(11) | -7.9(7)  | -9.3(7)  | -3.2(6)  |
| C31  | 28.7(7)  | 29.4(8)  | 40.9(9)  | -18.0(7) | -1.0(6)  | -2.5(6)  |
| C32  | 25.8(7)  | 26.9(7)  | 26.6(8)  | -9.3(6)  | -1.4(6)  | -3.5(6)  |

**Table S12 Bond Lengths for 3ac.**

| Atom | Atom | Length/Å   | Atom | Atom | Length/Å   |
|------|------|------------|------|------|------------|
| F1   | C16  | 1.3473(17) | F3   | C19  | 1.3540(17) |
| F2   | C15  | 1.3504(17) | F4   | C18  | 1.3516(18) |
| O1   | N1   | 1.4435(15) | O4   | N2   | 1.4492(15) |
| O1   | C9   | 1.449(2)   | O4   | C24  | 1.4534(17) |
| N1   | C7   | 1.4750(17) | N2   | C22  | 1.4482(17) |
| N1   | C12  | 1.4459(17) | N2   | C26  | 1.4961(17) |
| C1   | C2   | 1.395(2)   | C17  | C18  | 1.384(2)   |
| C1   | C6   | 1.393(2)   | C17  | C22  | 1.401(2)   |
| C1   | C7   | 1.5169(18) | C17  | C23  | 1.499(2)   |
| C2   | C3   | 1.385(2)   | C18  | C19  | 1.374(2)   |
| C3   | C4   | 1.386(2)   | C19  | C20  | 1.376(2)   |
| C4   | C5   | 1.385(2)   | C20  | C21  | 1.388(2)   |
| C5   | C6   | 1.391(2)   | C21  | C22  | 1.389(2)   |
| C7   | C8   | 1.544(2)   | C23  | C24  | 1.518(2)   |
| C8   | C9   | 1.532(2)   | C24  | C25  | 1.534(2)   |
| C9   | C10  | 1.521(2)   | C25  | C26  | 1.550(2)   |
| C10  | C11  | 1.507(2)   | C26  | C27  | 1.5151(19) |
| C11  | C12  | 1.400(2)   | C27  | C28  | 1.394(2)   |
| C11  | C16  | 1.383(2)   | C27  | C32  | 1.391(2)   |
| C12  | C13  | 1.385(2)   | C28  | C29  | 1.389(2)   |
| C13  | C14  | 1.387(2)   | C29  | C30  | 1.388(3)   |
| C14  | C15  | 1.377(2)   | C30  | C31  | 1.380(3)   |
| C15  | C16  | 1.379(2)   | C31  | C32  | 1.392(2)   |

**Table S13 Bond Angles for 3ac.**

| Atom | Atom | Atom | Angle/°    | Atom | Atom | Atom | Angle/°    |
|------|------|------|------------|------|------|------|------------|
| N1   | O1   | C9   | 103.89(10) | N2   | O4   | C24  | 104.54(10) |
| O1   | N1   | C7   | 101.28(10) | O4   | N2   | C26  | 102.20(10) |
| O1   | N1   | C12  | 107.91(10) | C22  | N2   | O4   | 106.87(10) |
| C12  | N1   | C7   | 111.42(11) | C22  | N2   | C26  | 111.44(10) |
| C2   | C1   | C7   | 118.42(12) | C18  | C17  | C22  | 116.59(14) |
| C6   | C1   | C2   | 118.48(13) | C18  | C17  | C23  | 121.88(14) |
| C6   | C1   | C7   | 123.10(12) | C22  | C17  | C23  | 121.52(13) |
| C3   | C2   | C1   | 120.95(14) | F4   | C18  | C17  | 119.08(15) |
| C2   | C3   | C4   | 120.25(14) | F4   | C18  | C19  | 118.83(14) |
| C5   | C4   | C3   | 119.37(14) | C19  | C18  | C17  | 122.08(14) |
| C4   | C5   | C6   | 120.50(14) | F3   | C19  | C18  | 118.56(15) |
| C5   | C6   | C1   | 120.45(14) | F3   | C19  | C20  | 120.37(15) |
| N1   | C7   | C1   | 111.48(11) | C18  | C19  | C20  | 121.07(14) |
| N1   | C7   | C8   | 102.95(11) | C19  | C20  | C21  | 118.47(15) |
| C1   | C7   | C8   | 113.24(12) | C20  | C21  | C22  | 120.21(14) |
| C9   | C8   | C7   | 103.30(12) | C17  | C22  | N2   | 120.04(13) |
| O1   | C9   | C8   | 103.94(12) | C21  | C22  | N2   | 118.43(12) |
| O1   | C9   | C10  | 106.89(13) | C21  | C22  | C17  | 121.49(13) |
| C10  | C9   | C8   | 113.29(13) | C17  | C23  | C24  | 109.20(12) |
| C11  | C10  | C9   | 107.61(12) | O4   | C24  | C23  | 107.95(12) |
| C12  | C11  | C10  | 121.00(13) | O4   | C24  | C25  | 103.20(11) |
| C16  | C11  | C10  | 121.71(14) | C23  | C24  | C25  | 113.75(13) |
| C16  | C11  | C12  | 117.27(14) | C24  | C25  | C26  | 103.81(11) |
| C11  | C12  | N1   | 120.74(13) | N2   | C26  | C25  | 104.30(11) |
| C13  | C12  | N1   | 118.13(13) | N2   | C26  | C27  | 111.41(11) |
| C13  | C12  | C11  | 121.12(13) | C27  | C26  | C25  | 113.28(12) |
| C12  | C13  | C14  | 120.28(14) | C28  | C27  | C26  | 122.00(13) |
| C15  | C14  | C13  | 118.81(14) | C32  | C27  | C26  | 119.35(13) |
| F2   | C15  | C14  | 120.50(14) | C32  | C27  | C28  | 118.53(14) |
| F2   | C15  | C16  | 118.73(14) | C29  | C28  | C27  | 120.53(15) |
| C14  | C15  | C16  | 120.77(14) | C30  | C29  | C28  | 120.31(15) |
| F1   | C16  | C11  | 119.38(14) | C31  | C30  | C29  | 119.68(14) |
| F1   | C16  | C15  | 118.94(14) | C30  | C31  | C32  | 120.02(15) |
| C15  | C16  | C11  | 121.67(14) | C27  | C32  | C31  | 120.92(15) |

**Table S14 Torsion Angles for 3ac.**

| A   | B   | C   | D   | Angle/°     | A   | B   | C   | D   | Angle/°     |
|-----|-----|-----|-----|-------------|-----|-----|-----|-----|-------------|
| F2  | C15 | C16 | F1  | -1.0(2)     | F3  | C19 | C20 | C21 | 178.19(14)  |
| F2  | C15 | C16 | C11 | -179.97(14) | F4  | C18 | C19 | F3  | 0.3(2)      |
| O1  | N1  | C7  | C1  | 79.92(12)   | F4  | C18 | C19 | C20 | -179.77(14) |
| O1  | N1  | C7  | C8  | -41.79(12)  | O4  | N2  | C22 | C17 | -28.88(15)  |
| O1  | N1  | C12 | C11 | 24.33(16)   | O4  | N2  | C22 | C21 | 148.62(12)  |
| O1  | N1  | C12 | C13 | -154.82(13) | O4  | N2  | C26 | C25 | 33.38(12)   |
| O1  | C9  | C10 | C11 | -48.73(16)  | O4  | N2  | C26 | C27 | -89.16(12)  |
| N1  | O1  | C9  | C8  | -38.13(13)  | O4  | C24 | C25 | C26 | -19.67(14)  |
| N1  | O1  | C9  | C10 | 81.94(13)   | N2  | O4  | C24 | C23 | -78.64(13)  |
| N1  | C7  | C8  | C9  | 18.56(14)   | N2  | O4  | C24 | C25 | 42.08(13)   |
| N1  | C12 | C13 | C14 | 177.13(14)  | N2  | C26 | C27 | C28 | 52.09(18)   |
| C1  | C2  | C3  | C4  | 0.4(2)      | N2  | C26 | C27 | C32 | -131.83(13) |
| C1  | C7  | C8  | C9  | -101.95(13) | C17 | C18 | C19 | F3  | 179.60(14)  |
| C2  | C1  | C6  | C5  | 0.0(2)      | C17 | C18 | C19 | C20 | -0.4(2)     |
| C2  | C1  | C7  | N1  | -175.42(12) | C17 | C23 | C24 | O4  | 41.98(15)   |
| C2  | C1  | C7  | C8  | -59.88(17)  | C17 | C23 | C24 | C25 | -71.89(15)  |
| C2  | C3  | C4  | C5  | -0.3(2)     | C18 | C17 | C22 | N2  | 174.30(13)  |
| C3  | C4  | C5  | C6  | 0.2(2)      | C18 | C17 | C22 | C21 | -3.1(2)     |
| C4  | C5  | C6  | C1  | 0.0(2)      | C18 | C17 | C23 | C24 | 179.13(13)  |
| C6  | C1  | C2  | C3  | -0.2(2)     | C18 | C19 | C20 | C21 | -1.8(2)     |
| C6  | C1  | C7  | N1  | 4.24(19)    | C19 | C20 | C21 | C22 | 1.5(2)      |
| C6  | C1  | C7  | C8  | 119.78(15)  | C20 | C21 | C22 | N2  | -176.42(13) |
| C7  | N1  | C12 | C11 | -86.01(15)  | C20 | C21 | C22 | C17 | 1.0(2)      |
| C7  | N1  | C12 | C13 | 94.84(15)   | C22 | N2  | C26 | C25 | -80.44(13)  |
| C7  | C1  | C2  | C3  | 179.48(13)  | C22 | N2  | C26 | C27 | 157.02(12)  |
| C7  | C1  | C6  | C5  | -179.64(13) | C22 | C17 | C18 | F4  | -177.84(12) |
| C7  | C8  | C9  | O1  | 11.23(14)   | C22 | C17 | C18 | C19 | 2.8(2)      |
| C7  | C8  | C9  | C10 | -104.42(14) | C22 | C17 | C23 | C24 | -2.17(19)   |
| C8  | C9  | C10 | C11 | 65.15(17)   | C23 | C17 | C18 | F4  | 0.9(2)      |
| C9  | O1  | N1  | C7  | 50.74(12)   | C23 | C17 | C18 | C19 | -178.40(14) |
| C9  | O1  | N1  | C12 | -66.37(13)  | C23 | C17 | C22 | N2  | -4.5(2)     |
| C9  | C10 | C11 | C12 | 7.1(2)      | C23 | C17 | C22 | C21 | 178.12(13)  |
| C9  | C10 | C11 | C16 | -171.57(15) | C23 | C24 | C25 | C26 | 97.01(14)   |
| C10 | C11 | C12 | N1  | 5.2(2)      | C24 | O4  | N2  | C22 | 69.38(12)   |
| C10 | C11 | C12 | C13 | -175.64(14) | C24 | O4  | N2  | C26 | -47.78(12)  |
| C10 | C11 | C16 | F1  | -2.0(2)     | C24 | C25 | C26 | N2  | -8.31(14)   |
| C10 | C11 | C16 | C15 | 176.93(15)  | C24 | C25 | C26 | C27 | 112.99(13)  |

**Table S14 Torsion Angles for 3ac.**

| A   | B   | C   | D   | Angle/°     | A   | B   | C   | D   | Angle/°     |
|-----|-----|-----|-----|-------------|-----|-----|-----|-----|-------------|
| C11 | C12 | C13 | C14 | -2.0(2)     | C25 | C26 | C27 | C28 | -65.12(17)  |
| C12 | N1  | C7  | C1  | -165.56(11) | C25 | C26 | C27 | C32 | 110.95(15)  |
| C12 | N1  | C7  | C8  | 72.73(13)   | C26 | N2  | C22 | C17 | 81.99(15)   |
| C12 | C11 | C16 | F1  | 179.27(13)  | C26 | N2  | C22 | C21 | -100.51(14) |
| C12 | C11 | C16 | C15 | -1.8(2)     | C26 | C27 | C28 | C29 | 175.81(14)  |
| C12 | C13 | C14 | C15 | -0.5(2)     | C26 | C27 | C32 | C31 | -175.76(13) |
| C13 | C14 | C15 | F2  | -178.87(15) | C27 | C28 | C29 | C30 | -0.4(2)     |
| C13 | C14 | C15 | C16 | 1.8(3)      | C28 | C27 | C32 | C31 | 0.5(2)      |
| C14 | C15 | C16 | F1  | 178.31(14)  | C28 | C29 | C30 | C31 | 0.9(2)      |
| C14 | C15 | C16 | C11 | -0.6(3)     | C29 | C30 | C31 | C32 | -0.8(2)     |
| C16 | C11 | C12 | N1  | -176.01(13) | C30 | C31 | C32 | C27 | 0.1(2)      |
| C16 | C11 | C12 | C13 | 3.1(2)      | C32 | C27 | C28 | C29 | -0.3(2)     |

**Table S15 Hydrogen Atom Coordinates ( $\text{\AA}\times 10^4$ ) and Isotropic Displacement Parameters ( $\text{\AA}^2\times 10^3$ ) for 3ac.**

| Atom | <i>x</i> | <i>y</i> | <i>z</i> | U(eq) |
|------|----------|----------|----------|-------|
| H2   | 7347.73  | 11941.97 | 6601.83  | 29    |
| H3   | 5486.78  | 13805.36 | 6480.31  | 34    |
| H4   | 3936.36  | 14092.43 | 7971.94  | 35    |
| H5   | 4251.91  | 12487.87 | 9576.74  | 35    |
| H6   | 6109.37  | 10611.82 | 9700.16  | 30    |
| H7   | 9101.49  | 10035.6  | 8171.45  | 26    |
| H8A  | 7303.45  | 9870.62  | 6577.44  | 37    |
| H8B  | 8945.44  | 8939.24  | 6878.65  | 37    |
| H9   | 6532.26  | 8260.53  | 7304.82  | 38    |
| H10A | 8090.57  | 6321.48  | 8268.94  | 39    |
| H10B | 8995.82  | 6806.52  | 7254.54  | 39    |
| H13  | 10424.2  | 8604.23  | 10459.17 | 35    |
| H14  | 12600.95 | 6942.22  | 10850.4  | 39    |
| H20  | 12074.54 | 7019.91  | 6259.87  | 35    |
| H21  | 10474.25 | 8923.26  | 5270.11  | 29    |
| H23A | 8304.06  | 6686.05  | 2872.71  | 34    |
| H23B | 9519.44  | 6965.06  | 2042.46  | 34    |
| H24  | 7492.08  | 8674.6   | 1431.61  | 31    |
| H25A | 6469.15  | 8259.38  | 3497.08  | 34    |
| H25B | 5761.3   | 9523.29  | 2559.03  | 34    |
| H26  | 7228.54  | 9319.52  | 4559.14  | 26    |
| H28  | 7001.53  | 11510.78 | 1860.31  | 37    |
| H29  | 5577.15  | 13587.4  | 1496.61  | 43    |
| H30  | 4116.89  | 14383.54 | 2892.27  | 42    |
| H31  | 4137.57  | 13107.9  | 4672.29  | 40    |
| H32  | 5569.8   | 11030.6  | 5043.51  | 32    |
